# Supplementary material for: Genome-wide Identification and Expression Analysis of Amino Acid Transporters in the Whitefly, Bemisia tabaci (Gennadius)
Source: PubMed Central journal article supplement — Int J Biol Sci. 2017 May 16;13(6):735–47. doi: 10.7150/ijbs.18153 (PMC5485629; doi:10.7150/ijbs.18153), 2017-05-16
Supplement: ijbsv13p0735s1.pdf [file ijbsv13p0735s1.pdf]

## Supplementary Materials

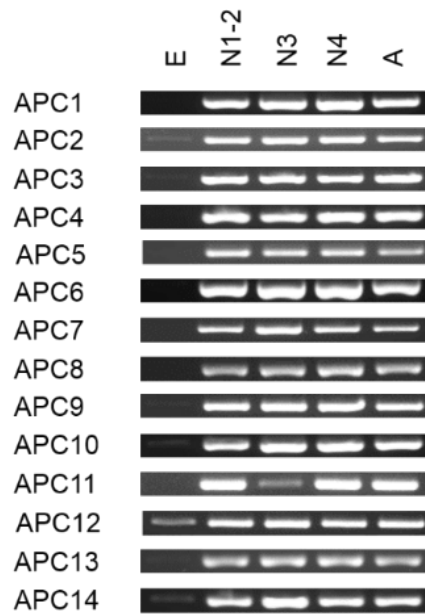

**Figure S1.** Amplification of 400 to 600-bp APC transporter gene fragments across different developmental stages of *B. tabaci*. E, Egg; N1-2, 1<sup>st</sup>- and 2<sup>nd</sup>-instar nymphs; N3, 3<sup>rd</sup>-instar nymph; N4, 4<sup>th</sup>-instar nymph; A, Adult.

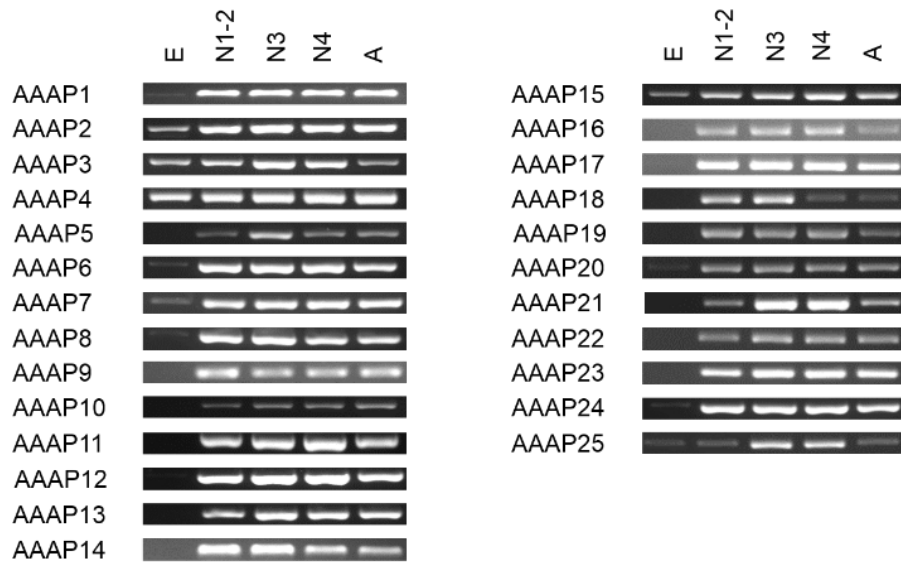

**Figure S2.** Amplification of 400 to 600-bp AAAP transporter gene fragments across different developmental stages of *B. tabaci*. E, Egg; N1-2, 1<sup>st</sup>- and 2<sup>nd</sup>-instar nymphs; N3, 3<sup>rd</sup>-instar nymph; N4, 4<sup>th</sup>-instar nymph; A, Adult.

**Table S1.** Identification of APC and AAAP genes in the *B. tabaci* B genome. The APC and AAAP sequences were obtained from the *B. tabaci* B genomic sequences and transcriptome databases, which were confirmed using the tBLASTX algorithm with a cut-off E-value of  $10^{-70}$ . Transmembrane (TM) helices were predicted by TOPCONS software, available at (<http://topcons.cbr.su.se/>). *A. pisum*, *Acyrtosiphon pisum*; *A. cephalotes*, *Atta cephalotes*; *B. impatiens*, *Bombus impatiens*; *C. lectularius*, *Cimex lectularius*; *C. quinquefasciatus*, *Culex quinquefasciatus*; *D. noxia*, *Diuraphis noxia*; *H. halys*, *Halyomorpha halys*; *H. saltator*, *Harpegnathos saltator*; *S. invicta*, *Solenopsis invicta*; *Z. nevadensis*, *Zootermopsis nevadensis*.

| Gene           | Scaffold | Start  | End    | AA  | Orientation | Exon | TM | Blast hit      | Species               | Identity | E-value | Coverage |
|----------------|----------|--------|--------|-----|-------------|------|----|----------------|-----------------------|----------|---------|----------|
| <i>BtAPC1</i>  | 41       | 528365 | 647266 | 501 | -           | 12   | 12 | XP_014252466.1 | <i>C. lectularius</i> | 79%      | 0       | 96%      |
| <i>BtAPC2</i>  | 55       | 565993 | 579717 | 486 | -           | 11   | 12 | XP_014286061.1 | <i>H. halys</i>       | 72%      | 0       | 97%      |
| <i>BtAPC3</i>  | 60       | 783377 | 791483 | 611 | +           | 13   | 14 | XP_015370694.1 | <i>D. noxia</i>       | 50%      | 0       | 95%      |
| <i>BtAPC4</i>  | 125      | 130357 | 185697 | 566 | +           | 13   | 14 | XP_014285984.1 | <i>H. halys</i>       | 81%      | 0       | 85%      |
| <i>BtAPC5</i>  | 183      | 396498 | 506465 | 792 | -           | 13   | 14 | KDR22125.1     | <i>Z. nevadensis</i>  | 69%      | 0       | 98%      |
| <i>BtAPC6</i>  | 538      | 30268  | 49049  | 500 | +           | 9    | 12 | XP_003485650.1 | <i>B. impatiens</i>   | 70%      | 0       | 92%      |
| <i>BtAPC7</i>  | 963      | 120329 | 135338 | 619 | +           | 11   | 12 | XP_001943940.1 | <i>A. pisum</i>       | 58%      | 0       | 79%      |
| <i>BtAPC8</i>  | 999      | 46729  | 64738  | 646 | -           | 9    | 14 | XP_014242275.1 | <i>C. lectularius</i> | 72%      | 0       | 98%      |
| <i>BtAPC9</i>  | 1270     | 72989  | 89703  | 614 | -           | 13   | 14 | XP_011168673.1 | <i>S. invicta</i>     | 54%      | 3E-168  | 96%      |
| <i>BtAPC10</i> | 1270     | 140120 | 158567 | 616 | +           | 13   | 14 | XP_012061678.1 | <i>A. cephalotes</i>  | 55%      | 0       | 94%      |
| <i>BtAPC11</i> | 1561     | 17206  | 33426  | 580 | -           | 11   | 12 | XP_001943940.1 | <i>A. pisum</i>       | 58%      | 0       | 84%      |
| <i>BtAPC12</i> | 1576     | 24441  | 65931  | 505 | +           | 7    | 12 | KDR11465.1     | <i>Z. nevadensis</i>  | 72%      | 0       | 89%      |
| <i>BtAPC13</i> | 1338     | 1409   | 13834  | 614 | +           | 13   | 14 | KYM76403.1     | <i>A. cephalotes</i>  | 52%      | 0       | 94%      |

|                 |      |         |         |      |   |    |    |                |                            |     |        |     |
|-----------------|------|---------|---------|------|---|----|----|----------------|----------------------------|-----|--------|-----|
| <i>BtAPC14</i>  | 1362 | 3242    | 19197   | 545  | - | 9  | 12 | KDR11465.1     | <i>Z. nevadensis</i>       | 63% | 0      | 92% |
| <i>BtAAAP1</i>  | 5    | 2961754 | 2980974 | 442  | + | 8  | 11 | XP_014241281.1 | <i>C. lectularius</i>      | 48% | 6E-122 | 93% |
| <i>BtAAAP2</i>  | 5    | 4266371 | 4279305 | 512  | + | 7  | 10 | XP_014279898.1 | <i>H. halys</i>            | 69% | 0      | 93% |
| <i>BtAAAP3</i>  | 10   | 2278493 | 2301442 | 508  | - | 7  | 10 | XP_001845151.1 | <i>C. quinquefasciatus</i> | 57% | 8E-173 | 92% |
| <i>BtAAAP4</i>  | 14   | 3533839 | 3552224 | 463  | + | 9  | 11 | XP_001945852.2 | <i>A. pisum</i>            | 68% | 0      | 95% |
| <i>BtAAAP5</i>  | 35   | 665239  | 677586  | 1081 | + | 10 | 11 | XP_011154879.1 | <i>H. saltator</i>         | 60% | 1E-145 | 36% |
| <i>BtAAAP6</i>  | 68   | 953386  | 999307  | 469  | + | 9  | 10 | XP_014272142.1 | <i>H. halys</i>            | 63% | 0      | 98% |
| <i>BtAAAP7</i>  | 160  | 321083  | 337031  | 463  | + | 8  | 11 | KDR07697.1     | <i>Z. nevadensis</i>       | 59% | 3E-161 | 91% |
| <i>BtAAAP8</i>  | 202  | 138739  | 171255  | 455  | + | 9  | 11 | XP_014285965.1 | <i>H. halys</i>            | 66% | 0      | 98% |
| <i>BtAAAP9</i>  | 202  | 342918  | 360434  | 561  | + | 13 | 11 | XP_015363508.1 | <i>D. noxia</i>            | 47% | 5E-155 | 97% |
| <i>BtAAAP10</i> | 234  | 152950  | 165220  | 454  | - | 9  | 11 | XP_014241281.1 | <i>C. lectularius</i>      | 44% | 7E-128 | 99% |
| <i>BtAAAP11</i> | 381  | 90753   | 125197  | 546  | + | 10 | 11 | XP_014285817.1 | <i>H. halys</i>            | 70% | 0      | 87% |
| <i>BtAAAP12</i> | 534  | 215882  | 224573  | 497  | + | 8  | 11 | XP_014293635.1 | <i>H. halys</i>            | 48% | 3E-142 | 97% |
| <i>BtAAAP13</i> | 566  | 23146   | 32010   | 467  | - | 9  | 11 | XP_014278668.1 | <i>H. halys</i>            | 54% | 1E-153 | 89% |
| <i>BtAAAP14</i> | 566  | 56724   | 65756   | 455  | - | 8  | 10 | XP_014278669.1 | <i>H. halys</i>            | 48% | 2E-129 | 97% |
| <i>BtAAAP15</i> | 566  | 69972   | 81014   | 459  | - | 8  | 10 | XP_008189238.1 | <i>A. pisum</i>            | 56% | 1E-141 | 81% |
| <i>BtAAAP16</i> | 566  | 94730   | 105206  | 450  | - | 8  | 11 | XP_008189238.1 | <i>A. pisum</i>            | 40% | 4E-103 | 96% |
| <i>BtAAAP17</i> | 566  | 115437  | 123160  | 442  | - | 9  | 11 | XP_015369666.1 | <i>D. noxia</i>            | 41% | 1E-80  | 85% |
| <i>BtAAAP18</i> | 566  | 126339  | 140007  | 470  | - | 9  | 11 | XP_014278669.1 | <i>H. halys</i>            | 39% | 3E-117 | 98% |
| <i>BtAAAP19</i> | 566  | 141985  | 154513  | 459  | - | 8  | 11 | XP_014278669.1 | <i>H. halys</i>            | 41% | 6E-115 | 98% |
| <i>BtAAAP20</i> | 566  | 156752  | 165127  | 450  | - | 8  | 11 | XP_008189238.1 | <i>A. pisum</i>            | 39% | 2E-106 | 96% |

|                 |      |        |        |     |   |    |    |                |                       |     |        |     |
|-----------------|------|--------|--------|-----|---|----|----|----------------|-----------------------|-----|--------|-----|
| <i>BtAAAP21</i> | 566  | 170666 | 190146 | 497 | - | 10 | 10 | XP_014278668.1 | <i>H. halys</i>       | 57% | 0      | 95% |
| <i>BtAAAP22</i> | 873  | 31197  | 41895  | 557 | + | 9  | 11 | XP_014239846.1 | <i>C. lectularius</i> | 45% | 3E-147 | 95% |
| <i>BtAAAP23</i> | 1219 | 64767  | 70325  | 535 | - | 2  | 11 | XP_015363705.1 | <i>D. noxia</i>       | 73% | 0      | 99% |
| <i>BtAAAP24</i> | 1576 | 117215 | 131298 | 463 | + | 6  | 11 | XP_014278669.1 | <i>H. halys</i>       | 44% | 6E-121 | 89% |
| <i>BtAAAP25</i> | 1810 | 3231   | 14171  | 557 | - | 9  | 11 | XP_014239846.1 | <i>C. lectularius</i> | 45% | 4E-147 | 94% |

---

**Table S2.** Primers used for studying AATs.

| Purpose             | Primer Name | Sequence (5'-3')      | Size (bp) | T <sub>m</sub> (°C) |
|---------------------|-------------|-----------------------|-----------|---------------------|
| Gene fragment clone | APC1-F      | TGACAACACCACAACGGAAGT | 454       | 58.4                |
|                     | APC1-R      | GGACAGGAACGCAATACAAAG |           | 57.5                |
|                     | APC2-F      | GGTGGTGACTACGCCTACA   | 494       | 53.6                |
|                     | APC2-R      | ATTGCCCTTGGGAGATTTA   |           | 54.7                |
|                     | APC3-F      | ATGCCTATGTAACGGTTGG   | 554       | 53.3                |
|                     | APC3-R      | GCAAATTATTGTCAGGGAAA  |           | 53.1                |
|                     | APC4-F      | GGACGATGAACCCGAGCAA   | 446       | 61.3                |
|                     | APC4-R      | CCAACCATCATA CGCCAC   |           | 59                  |
|                     | APC5-F      | TCCGTT CACGCTGGTTCAA  | 567       | 60.4                |
|                     | APC5-R      | GCTCAGAGGCGGCTTCATT   |           | 60.2                |
|                     | APC6-F      | CCATCCAGCAACGCTATCA   | 431       | 57.5                |
|                     | APC6-R      | ACAGTGACCAGCGGCAGAG   |           | 58.9                |
|                     | APC7-F      | TTAGCGTGCAATTTGGAGT   | 535       | 54.2                |
|                     | APC7-R      | TCATTAAGCTGGGCTGTCT   |           | 52.9                |
|                     | APC8-F      | GGTGAACCTGAGCGTGATG   | 473       | 56.4                |

|         |                        |     |      |
|---------|------------------------|-----|------|
| APC8-R  | CAAGGAAGGCGAAGATGAGT   |     | 56.8 |
| APC9-F  | ACATCTTCACGACCGTAAACT  | 504 | 54   |
| APC9-R  | CATCTGATGACATGGCGTAT   |     | 53.6 |
| APC10-F | TTGCCGCTCTTTGTTATGC    | 406 | 57.3 |
| APC10-R | GAAGGCTTGCGACTGTTA     |     | 56.2 |
| APC11-F | ATTCGCCAGTTTCCTCGTC    | 451 | 57.3 |
| APC11-R | GTCACAGCAAGGCTCATCG    |     | 56.8 |
| APC12-F | CACTGGTGCTCAAGAGGGA    | 408 | 56.1 |
| APC12-R | GATTTCAATGCGAATGGTTT   |     | 55.3 |
| APC13-F | GAATCGGGTCAACTCTTGG    | 521 | 54.8 |
| APC13-R | GGAAGGCTTGGCTACTGTTA   |     | 54.9 |
| APC14-F | GGGATTACAACCCAGCCAACA  | 522 | 62.1 |
| APC14-R | GAGCACCAGTGACAAACAGACG |     | 60.5 |
| AAAP1-F | ACGATCTTCCACCTCTTTC    | 456 | 50.9 |
| AAAP1-R | CAACAATAGCTGTGCCAAC    |     | 51.8 |
| AAAP2-F | AGACGCTGCTCAAGACAAC    | 415 | 53   |
| AAAP2-R | GCCAAAGACTAGGGCTAAAA   |     | 54.6 |

|          |                       |     |      |
|----------|-----------------------|-----|------|
| AAAP3-F  | GGCATCCATCCTGACAACT   | 581 | 54.8 |
| AAAP3-R  | TACTCACAGCACCGACCAA   |     | 54.9 |
| AAAP4-F  | GCAGGTCGCTGACGAGTTA   | 517 | 56.8 |
| AAAP4-R  | TGCTTGAAGGGCGTATGTT   |     | 56.5 |
| AAAP5-F  | TGAAAGCAACACGGAAAGA   | 586 | 54.7 |
| AAAP5-R  | TCAGCCAGAGTCAGCACAT   |     | 53.7 |
| AAAP6-F  | AAACGGGACCAACCAAGTA   | 525 | 55.2 |
| AAAP6-R  | AATATCCGAAGAAGCCAACA  |     | 55   |
| AAAP7-F  | GACGGTCTGAACCTGGAAA   | 514 | 55.2 |
| AAAP7-R  | CGAAAGTTGTAAGGGTGATGG |     | 57.4 |
| AAAP8-F  | ATGATGTTGGCGTTCGTAG   | 575 | 54   |
| AAAP8-R  | AAGTGCGTTATCTTGTCCC   |     | 52.3 |
| AAAP9-F  | GATGAGGCACAACAAGGAT   | 420 | 52.3 |
| AAAP9-R  | GGGAGTGTAAGACGCAGA    |     | 53   |
| AAAP10-F | GGTCTTGCCAGGAGATTTG   | 523 | 55   |
| AAAP10-R | TGCTACCTTGACCTCGTCA   |     | 53.8 |
| AAAP11-F | TGCTGGTTGGAATTGGGATA  | 464 | 58.7 |



|          |                        |     |      |
|----------|------------------------|-----|------|
| AAAP11-R | TTCGGCAGTCTTTGGCTTG    |     | 59.5 |
| AAAP12-F | AAATGGTGGAAATGGCTGAG   | 472 | 57.4 |
| AAAP12-R | GCTGGTAACGAGTGGTGGC    |     | 58.5 |
| AAAP13-F | AAATGCTTGTGCGGTCAGA    | 407 | 57.1 |
| AAAP13-R | GGAGAAACTCGGCAAATCG    |     | 58   |
| AAAP14-F | ATACTTGGCACCAGTGTCTT   | 571 | 51.8 |
| AAAP14-R | GAACAACCTCCAGGTTAGGG   |     | 51.6 |
| AAAP15-F | AATGCTGCGTGGTTTATGT    | 430 | 53.8 |
| AAAP15-R | CTCCAAATCTGCTGGTGAA    |     | 53.7 |
| AAAP16-F | CTGTGCTCAGCGTTCATCT    | 431 | 53.8 |
| AAAP16-R | TTCCGTCCTTCAGTCGTG     |     | 56.4 |
| AAAP17-F | ATCCTGAAGTAGCCGAAGC    | 409 | 54.4 |
| AAAP17-R | TCCAGTGCGAACAATGTAG    |     | 52   |
| AAAP18-F | CGGTGTTGTAAATGTAGCG    | 420 | 52.4 |
| AAAP18-R | TTCCAGAATGTGAGGGTGT    |     | 52.5 |
| AAAP19-F | ATGAACTATGTAGACGGAAACG | 592 | 54.3 |
| AAAP19-R | GCCAGATAACCGAAGAAGC    |     | 54.9 |

|          |                       |     |      |
|----------|-----------------------|-----|------|
| AAAP20-F | GGAGGCGGCATTTGAGTTA   | 496 | 58.5 |
| AAAP20-R | TGGGATCGTTGCTGCGTTA   |     | 60.6 |
| AAAP21-F | AGCGGAAGGAAGCATAACT   | 466 | 54.3 |
| AAAP21-R | GCTGAGAAAGAACTCGTGGTA |     | 54.7 |
| AAAP22-F | GCCGCACATCTTGCTCTAC   | 430 | 56.4 |
| AAAP22-R | GTTTGTACCAACCCGAAA    |     | 56.2 |
| AAAP23-F | GCAGCAGGTCATCACCAACA  | 445 | 59.7 |
| AAAP23-R | CGAGCCGGAGTCGTAAATC   |     | 58.1 |
| AAAP24-F | CGACCATAGGTACGGAACG   | 423 | 56.2 |
| AAAP24-R | GTGATGCTGCTTTGGGTGA   |     | 57.1 |
| AAAP25-F | CCGCACATCTTGCTCTAC    | 426 | 51.4 |
| AAAP25-R | GGTCACCAACCCGAAA      |     | 51.2 |

---

qPCR analysis

|         |                           |     |      |
|---------|---------------------------|-----|------|
| qAPC3F  | TCATAGGAGTTGGAAGTCTGGAAGC | 108 | 63.2 |
| qAPC3R  | CTGTGACACCATACGGAAAGAAACC |     | 64   |
| qAPC6F  | TGGGTGGCGTTGATGGTGATAC    | 139 | 65   |
| qAPC6R  | AGACA ACTACGGCAGCGATGAG   |     | 62   |
| qAPC12F | CAACTGTCTTAGCGTGCGATGG    | 116 | 63.2 |

|          |                           |     |      |
|----------|---------------------------|-----|------|
| qAPC12R  | TGTTACCGAGCAGGATGTGACC    |     | 62.2 |
| qAAAP2F  | CTACTGGGACCCGTTCAAGGAG    | 161 | 62.6 |
| qAAAP2R  | CGATGATGGTGGCGAAGATGC     |     | 64.8 |
| qAAAP7F  | GAACTGATCGGAATTGGTCTGGTC  | 91  | 63.8 |
| qAAAP7R  | AAGGCTTGGTGAAGGAGTCTGG    |     | 62.3 |
| qAAAP10F | GGTCTTATCGGCACGGCAATG     | 161 | 65   |
| qAAAP10R | TTGGCAGCGGGTAGGTTTCC      |     | 64.6 |
| qAAAP11F | TGCTGGTTGGAATTGGGATA      | 94  | 58.7 |
| qAAAP11R | AAGGATGAGAAGTGCTGGTGT     |     | 56.1 |
| qAAAP13F | GCTGGGCATTATAGGCACTCTTG   | 165 | 59.3 |
| qAAAP13R | GGTCTAAATGTCTTGGGTCCTTCTG |     | 59.1 |
| qAAAP14F | TTCTCACTGACCTGCCAAGC      | 156 | 58.4 |
| qAAAP14R | ACCCGCGAAACTGTGCTG        |     | 59.9 |
| qAAAP17F | TCTTTGCCTCTTGGGACCCTTAG   | 164 | 59.5 |
| qAAAP17R | CGGACGCCTTTCTGTGTTTCG     |     | 59   |
| qAAAP18F | CTCCCTTCGGTGTTGTAAATGTAGC | 130 | 59.9 |
| qAAAP18R | CCAGTCTGCGGTAGATTCAATGTG  |     | 59.6 |

|                              |            |                            |     |      |
|------------------------------|------------|----------------------------|-----|------|
|                              | qAAAP24F   | TCCCTGCCCTGGGTATCTT        | 165 | 59.1 |
|                              | qAAAP24R   | CGATCTCGTAAACGGTGGTG       |     | 58.8 |
| dsRNA synthesis <sup>a</sup> | dsAAAP15-F | T7-AAAATGCTGCGTGGTTTATGT   | 434 |      |
|                              | dsAAAP15-R | T7-GACTCCAAATCTGCTGGTGAA   |     |      |
|                              | dsAAAP21-F | T7-ATCCCGCACATTTACAAACGACA | 380 |      |
|                              | dsAAAP21-R | T7-GCCGCAATCCATCCATTCCACAT |     |      |
|                              | dsEGFP-F   | T7-CCACAAGTTCAGCGTGTCCG    | 469 |      |
|                              | dsEGFP-R   | T7-AAGTTCACCTTGATGCCGTTTC  |     |      |

<sup>a</sup> Forward and reverse primers used to synthesize dsRNA template with a T7 RNA polymerase promoter sequence (5'-TAATACGACTCACTATAGGGAGA-3') appended to their 5'ends.

**Table S3.** FPKM values of the APC transporter genes of *B. tabaci* B at different developmental stages obtained from the transcriptome data. Note: E, Egg; N1-2, 1<sup>st</sup>- and 2<sup>nd</sup>-instar nymphs; N3, 3<sup>rd</sup>-instar nymph; N4, 4<sup>th</sup>-instar nymph; M, Male; F, Female.

| Gene           | E        | N1-2     | N3       | N4       | M        | F        |
|----------------|----------|----------|----------|----------|----------|----------|
| <i>BtAPC1</i>  | 0.504086 | 2.467177 | 4.721837 | 1.11845  | 0.596027 | 0.874986 |
| <i>BtAPC2</i>  | 2.611293 | 2.940217 | 4.071933 | 1.996583 | 4.251477 | 0.481615 |
| <i>BtAPC3</i>  | 2.044453 | 5.93996  | 2.583997 | 2.3714   | 4.487063 | 1.727113 |
| <i>BtAPC4</i>  | 2.381347 | 13.96093 | 11.30084 | 11.19374 | 7.231903 | 18.99333 |
| <i>BtAPC5</i>  | 0.223266 | 0.791615 | 1.080903 | 1.007421 | 0.289564 | 0.407779 |
| <i>BtAPC6</i>  | 0.767753 | 17.21833 | 7.496543 | 7.006953 | 11.9449  | 4.766767 |
| <i>BtAPC7</i>  | 0.934964 | 2.470587 | 3.30673  | 3.928823 | 4.093657 | 3.575047 |
| <i>BtAPC8</i>  | 1.046626 | 4.794157 | 4.128153 | 4.282357 | 1.195909 | 3.070477 |
| <i>BtAPC9</i>  | 0.872926 | 9.5131   | 11.08772 | 6.113173 | 5.550617 | 5.823617 |
| <i>BtAPC10</i> | 0.411657 | 3.146057 | 4.009803 | 3.35583  | 4.7319   | 0.422492 |
| <i>BtAPC11</i> | 0.668551 | 1.682807 | 2.33072  | 2.619883 | 2.699473 | 2.66842  |
| <i>BtAPC12</i> | 5.329157 | 5.681487 | 7.551027 | 7.241447 | 4.710057 | 3.168047 |
| <i>BtAPC13</i> | 0.070793 | 0.995794 | 1.063923 | 0.885433 | 0.366296 | 1.247499 |
| <i>BtAPC14</i> | 0.184033 | 0.425704 | 0.161544 | 0.167623 | 0.103785 | 0.20269  |

**Table S4.** FPKM values of the AAAP transporter genes of *B. tabaci* B at different developmental stages obtained from the transcriptome data. Note: E, Egg; N1-2, 1<sup>st</sup>- and 2<sup>nd</sup>-instar nymphs; N3, 3<sup>rd</sup>-instar nymph; N4, 4<sup>th</sup>-instar nymph; M, Male; F, Female.

| <b>Gene</b>     | <b>E</b> | <b>N-1-2</b> | <b>N3</b> | <b>N4</b> | <b>M</b> | <b>F</b> |
|-----------------|----------|--------------|-----------|-----------|----------|----------|
| <i>BtAAAP1</i>  | 0.578572 | 8.22011      | 2.717903  | 1.585687  | 7.123683 | 0.73588  |
| <i>BtAAAP2</i>  | 10.22989 | 42.45715     | 38.52777  | 30.73893  | 48.3596  | 38.10693 |
| <i>BtAAAP3</i>  | 3.785387 | 4.692065     | 2.689527  | 2.322433  | 2.248233 | 2.04184  |
| <i>BtAAAP4</i>  | 4.159583 | 10.31182     | 14.2902   | 47.52007  | 14.30133 | 25.93267 |
| <i>BtAAAP5</i>  | 1.33198  | 2.080803     | 1.568687  | 0.717603  | 0.710404 | 0.496467 |
| <i>BtAAAP6</i>  | 1.641683 | 18.72775     | 13.70547  | 13.6206   | 2.67204  | 3.782507 |
| <i>BtAAAP7</i>  | 11.07331 | 14.9074      | 16.44983  | 13.8911   | 27.82387 | 13.0303  |
| <i>BtAAAP8</i>  | 0.673517 | 1.465861     | 1.738897  | 2.17426   | 2.037133 | 2.057167 |
| <i>BtAAAP9</i>  | 2.819563 | 6.880185     | 2.748393  | 8.535253  | 2.59104  | 1.546641 |
| <i>BtAAAP10</i> | 1.029008 | 9.85917      | 7.503357  | 3.700123  | 4.457277 | 3.83278  |
| <i>BtAAAP11</i> | 2.5482   | 12.68444     | 6.184347  | 5.73427   | 7.228037 | 7.745347 |
| <i>BtAAAP12</i> | 6.215703 | 14.99574     | 6.97934   | 3.292537  | 3.90188  | 3.541563 |
| <i>BtAAAP13</i> | 0.479833 | 4.671355     | 3.857377  | 2.02055   | 1.56855  | 1.509409 |
| <i>BtAAAP14</i> | 0.211091 | 5.55668      | 2.51767   | 2.96598   | 1.072565 | 0.810339 |
| <i>BtAAAP15</i> | 0.619186 | 96.51715     | 47.78057  | 34.7676   | 68.78437 | 13.0185  |
| <i>BtAAAP16</i> | 0.273658 | 4.3046       | 2.462887  | 1.812973  | 2.743743 | 1.991897 |
| <i>BtAAAP17</i> | 0.101924 | 9.61594      | 2.506403  | 1.356402  | 9.11255  | 0.439513 |
| <i>BtAAAP18</i> | 0.65359  | 5.823135     | 5.923733  | 2.740057  | 1.849917 | 0.677337 |
| <i>BtAAAP19</i> | 0.161588 | 10.45209     | 5.24838   | 0.879947  | 4.270933 | 0.418059 |
| <i>BtAAAP20</i> | 0.0001   | 1.511268     | 0.628093  | 0.3628    | 1.658513 | 0.148794 |
| <i>BtAAAP21</i> | 5.921527 | 53.23185     | 48.2102   | 66.43923  | 21.77993 | 27.6284  |
| <i>BtAAAP22</i> | 0.215216 | 0.248912     | 1.153725  | 1.642097  | 0.087835 | 0.11174  |
| <i>BtAAAP23</i> | 1.477754 | 6.146175     | 5.291007  | 9.562527  | 2.19235  | 5.467257 |
| <i>BtAAAP24</i> | 1.616925 | 9.2429       | 6.08309   | 5.516797  | 1.731983 | 1.393157 |
| <i>BtAAAP25</i> | 0.335507 | 0.192477     | 2.204997  | 2.69716   | 0.07752  | 0.13494  |

**Table S5.** FPKM values of the APC transporter genes of *B. tabaci* B on different hosts obtained from the transcriptome data. Transcriptome data were obtained from our transcriptome database [49]. Note: Ca\_F, Female *B. tabaci* B on cabbage; Ca\_M, Male *B. tabaci* B on cabbage; Cu\_F, Female *B. tabaci* B on cucumber; Cu\_M, Male *B. tabaci* B on cucumber; Co\_F, Female *B. tabaci* B on cotton; Co\_M, Male *B. tabaci* B on cotton. To\_F, Female *B. tabaci* B on tomato; To\_M, Male *B. tabaci* B on tomato.

| Gene           | Cu_M     | Cu_F    | To_M    | To_F    | Co_M    | Co_F     | Ca_M     | Ca_F    |
|----------------|----------|---------|---------|---------|---------|----------|----------|---------|
| <i>BtAPC1</i>  | 0.71561  | 2.59484 | 6.40264 | 4.73536 | 1.47041 | 4.58135  | 0.908491 | 3.3861  |
| <i>BtAPC2</i>  | 10.5207  | 1.36497 | 14.3225 | 3.39305 | 9.79553 | 0.380041 | 8.20607  | 1.37777 |
| <i>BtAPC3</i>  | 7.29165  | 1.22984 | 6.51042 | 1.4965  | 9.26157 | 1.88848  | 6.40502  | 3.5285  |
| <i>BtAPC4</i>  | 6.36161  | 23.6523 | 14.902  | 46.7852 | 7.53555 | 47.9464  | 6.21923  | 33.1499 |
| <i>BtAPC5</i>  | 0.794669 | 3.54625 | 1.53731 | 8.80196 | 1.25033 | 6.69387  | 0.525921 | 4.97186 |
| <i>BtAPC6</i>  | 11.1649  | 3.12895 | 21.4266 | 8.7605  | 17.6739 | 7.38503  | 18.8556  | 10.263  |
| <i>BtAPC7</i>  | 8.0125   | 5.66654 | 7.86717 | 8.2144  | 15.8144 | 11.544   | 12.9255  | 12.3286 |
| <i>BtAPC8</i>  | 1.37568  | 8.20883 | 4.13151 | 13.2228 | 2.75481 | 22.6107  | 2.2761   | 10.4078 |
| <i>BtAPC9</i>  | 6.7649   | 13.4289 | 11.5115 | 19.9085 | 9.66243 | 22.5264  | 6.36677  | 12.3807 |
| <i>BtAPC10</i> | 11.3984  | 4.45091 | 9.51716 | 6.18288 | 7.7459  | 4.59249  | 8.32143  | 4.25481 |
| <i>BtAPC11</i> | 5.69727  | 4.51959 | 4.96831 | 3.13376 | 12.1851 | 10.4354  | 10.1972  | 9.20616 |

|                |         |         |         |         |         |         |         |         |
|----------------|---------|---------|---------|---------|---------|---------|---------|---------|
| <i>BtAPC12</i> | 5.06789 | 5.30733 | 15.3353 | 13.5422 | 9.04664 | 16.7198 | 6.18353 | 7.90625 |
| <i>BtAPC13</i> | 1.67505 | 3.53658 | 1.82143 | 2.09064 | 1.38404 | 3.16782 | 1.37607 | 3.69418 |
| <i>BtAPC14</i> | 5.1911  | 4.90379 | 4.08498 | 3.14798 | 7.60005 | 9.77595 | 3.28993 | 2.80665 |

---



**Table S6.** FPKM values of the AAAP transporter genes of *B. tabaci* B on different hosts obtained from the transcriptome data. Transcriptome data were obtained from our transcriptome database [49]. Note: Ca\_F, Female *B. tabaci* B on cabbage; Ca\_M, Male *B. tabaci* B on cabbage; Cu\_F, Female *B. tabaci* B on cucumber; Cu\_M, Male *B. tabaci* B on cucumber; Co\_F, Female *B. tabaci* B on cotton; Co\_M, Male *B. tabaci* B on cotton. To\_F, Female *B. tabaci* B on tomato; To\_M, Male *B. tabaci* B on tomato.

| Gene            | Cu_M    | Cu_F     | To_M     | To_F     | Co_M    | Co_F     | Ca_M    | Ca_F    |
|-----------------|---------|----------|----------|----------|---------|----------|---------|---------|
| <i>BtAAAP1</i>  | 15.793  | 2.76318  | 10.7074  | 4.95606  | 14.9092 | 6.46244  | 12.5229 | 4.29521 |
| <i>BtAAAP2</i>  | 63.3379 | 43.8228  | 126.791  | 84.0371  | 91.162  | 105.438  | 57.9339 | 67.3925 |
| <i>BtAAAP3</i>  | 2.65329 | 2.35534  | 2.96127  | 2.4433   | 1.71382 | 2.75429  | 2.01014 | 2.82914 |
| <i>BtAAAP4</i>  | 10.0096 | 29.8833  | 24.2739  | 56.9124  | 18.8115 | 94.3445  | 10.6115 | 47.5306 |
| <i>BtAAAP5</i>  | 0.62224 | 0.807301 | 0.491468 | 0.135073 | 1.06187 | 0.550693 | 0.35637 | 1.14082 |
| <i>BtAAAP6</i>  | 5.47551 | 13.7767  | 4.05614  | 11.5464  | 5.45311 | 11.9665  | 2.80742 | 9.96717 |
| <i>BtAAAP7</i>  | 41.8304 | 10.1087  | 63.6086  | 33.6174  | 35.9897 | 24.9825  | 45.6354 | 20.6175 |
| <i>BtAAAP8</i>  | 5.72574 | 2.9992   | 4.13452  | 4.87386  | 4.60781 | 4.11404  | 4.44163 | 3.98968 |
| <i>BtAAAP9</i>  | 2.26104 | 2.52855  | 2.80876  | 2.10838  | 4.73305 | 2.58523  | 3.90361 | 2.57737 |
| <i>BtAAAP10</i> | 7.68244 | 14.7411  | 6.94265  | 7.02175  | 9.54278 | 8.07712  | 4.63147 | 11.3793 |
| <i>BtAAAP11</i> | 10.8255 | 12.8747  | 22.4179  | 18.0874  | 12.4113 | 20.5716  | 9.14341 | 20.0882 |

|                 |          |          |          |          |          |          |         |          |
|-----------------|----------|----------|----------|----------|----------|----------|---------|----------|
| <i>BtAAAP12</i> | 8.30079  | 2.47066  | 10.4889  | 1.78319  | 8.45991  | 3.9655   | 5.95928 | 5.27128  |
| <i>BtAAAP13</i> | 4.79259  | 7.24894  | 4.19629  | 3.62982  | 6.59685  | 5.48858  | 3.74476 | 5.96935  |
| <i>BtAAAP14</i> | 7.84666  | 5.16724  | 4.68925  | 2.8936   | 7.46658  | 6.57686  | 5.86542 | 6.92944  |
| <i>BtAAAP15</i> | 125.87   | 70.2869  | 121.095  | 77.6132  | 151.895  | 76.3586  | 93.9304 | 75.4808  |
| <i>BtAAAP16</i> | 9.55471  | 4.77589  | 2.09038  | 4.85694  | 5.58524  | 11.6481  | 3.64329 | 10.6702  |
| <i>BtAAAP17</i> | 7.08104  | 2.89034  | 4.38813  | 0.875946 | 9.15722  | 1.06287  | 3.2098  | 1.69543  |
| <i>BtAAAP18</i> | 2.17861  | 0.714491 | 1.18873  | 1.09298  | 2.51374  | 0.596796 | 2.76351 | 1.44238  |
| <i>BtAAAP19</i> | 1.04385  | 0.880296 | 0.582507 | 0.368215 | 0.985434 | 0.643378 | 1.61914 | 0.699736 |
| <i>BtAAAP20</i> | 1.38849  | 0.159674 | 1.91595  | 1.13987  | 3.27698  | 0.207467 | 2.38084 | 0.22564  |
| <i>BtAAAP21</i> | 21.4838  | 42.655   | 28.2192  | 58.1763  | 23.9546  | 78.2834  | 22.8014 | 44.3735  |
| <i>BtAAAP22</i> | 0.02456  | 0.082848 | 0.0001   | 0.110893 | 0.115929 | 0.080734 | 0.0001  | 0.087806 |
| <i>BtAAAP23</i> | 1.2516   | 7.76232  | 4.0044   | 15.5997  | 2.41236  | 16.9714  | 2.2779  | 11.1867  |
| <i>BtAAAP24</i> | 5.99708  | 1.87615  | 3.62727  | 2.8388   | 6.57461  | 3.49758  | 2.78466 | 4.26504  |
| <i>BtAAAP25</i> | 0.024478 | 0.082572 | 0.0001   | 0.0001   | 0.069326 | 0.241397 | 0.0486  | 0.029171 |

---

**Table S7.** Amino acid sequences of the APC transporters of the eight species.

| Gene   | Amino acid sequences                                                                                                                                                                                                                                                                                                                                                                                                                                                                                                                                                                                                                                                         |
|--------|------------------------------------------------------------------------------------------------------------------------------------------------------------------------------------------------------------------------------------------------------------------------------------------------------------------------------------------------------------------------------------------------------------------------------------------------------------------------------------------------------------------------------------------------------------------------------------------------------------------------------------------------------------------------------|
| BtAPC1 | MSQTPEPPPEKVPLRATMEDIDLGSDETETDKKDDSEVKLEAKMSLLNGIT<br>VIVGSIIGSGIFVSPSGVLRRTTGSVNMALIVWTISGVFSMVGAYCYAELGC<br>MISKSGADYAYIMETFGPFLAFIRLWIECMIVRPCSQAIVALTFYSIYVLKPF<br>VDCDPPDLVRLAVCCIMVLTFINCYSVKWATRVDYFTYAKLLALFVII<br>LAGVYQLFQGQTQHFTFDNTTTEVTSIALSFYSGLFAYNGWNYLNFIIIEEL<br>KDPVRNLPKAI AISCSLVTVVYVLANVAFYTTLSPQEVLNSEAVAVTFADR<br>LFGVMAWTIPV FVAMSTFGAVNGVLLTSSRLFYAGACEGQMPEILTMIQI<br>HRLTPAPAVLCIAFLSMLYLTVSDIYALINYVGFATWLSIGVAVLCLPVLRY<br>TQPKLHRPIKVNLFPAIYIICSVFVTVVPMI ASPVETGIGCLMILTSVPVY<br>LVFIAWKNKPKPLQRAVVKMTHALQKSMMVVGKQSAPSTL                                                                                                                  |
| BtAPC2 | MTSSSELGTPMVPVGTKQEKVCMKKQLGLLEGVAILGIIFGSGIFISPTTV<br>IQDAKSAGLSLLIWVLCGILSMVGALCYAELGTSIPKSGGDYAYIFEAFGPI<br>PAFLYLWDAMLIFVPTTNAIMGLTFANYI IKPFPTCDVPDLPKKLIASVI<br>CFLTFLNCYNVKATARTQNVFMIAKIAALCIIILAGLAYMTFADRGMTNFE<br>DVWANTTSDAGQIAVAFYSGIFS YSGWNYLNFMTTELKNPYVNLPRAIYI<br>SLPIVTFIYVLANVAYLAVLTPVEMIQSEAVAVSFADSIMGPLAWTMSLMV<br>AMSAFGGLSVHIMTSSRMCVFGARYGHFPAMLSHISVDRFTPTPSLVFLN<br>ILSLIMLYTSNVRDLITYSTFVESFFITLSVSGLLYLRWKQPNRPRPIKISIW<br>PILFVILCLFLVLPFFDSPLVVGVGLITLSGVPVYFVGVVWQPKPKWFR<br>SALDKTTYVVQKLFMSAKEEREL                                                                                                                                       |
| BtAPC3 | MVSFWDISISQRKTFSTIAKEESKLRVLTTYDLTALSIGSTLGIGIYVLPGA<br>VAKNVAGPSVVL SFVLA AFACVLSGICYAELSSRVPKAGSAYIYAYVTVG<br>ELMAFIIGWV VIMEYVIGASSVARGLSVYVDSL FNGTMEATFREYQIEN<br>VPFLSPYDFDFTCAVCILGIALSVGLKESARMNNVLV VINAVMLIVIGVG<br>SLEANFHNWALTPKEVPSGYGVGGFFPYGVTGAIAGAATCFYGFVGFDSI<br>TTTGEEVENPQRALPLSII SLTICVLYCGVAIVLTLMWPYLQDVNAPLP<br>YVFGQIGWPVWQVWVTIGGIVGTFASLIGSLLPIPRVVYSMADDGLLKF<br>LATVHPKFGTPFTATLVTSVIAGVLGGIFNLKQLVDLMSIGTLLAFTLVAVC<br>VLILRYRDEPDENCMLINSEIGESSRLTQVWLGEKTTVKKIFKQLWNWNK<br>LTIPTYLSSAIVTVETILFVSCSIGLVSLVNYKASLDASNFAVYTIITVSMIF<br>LLISISLQPTSLISLQFKVPFVPILPAISIMFNVYLMLLLDLATWIRFVSWLS<br>VGFVIYFCYGITHSSERKSAIQNQRCSGGYDTLSPNISIVRDPIL |
| BtAPC4 | MKHKFRDLFSCSNSSSELSNNNNTTASN NNLPAGNHAQNGKEGVQWRS<br>GMGGRGLGLGLGGAGSGGGGSGGAGGSGGEAETDDQDDGPRGDKLE<br>GADPAQDDTLHLQRRVGLLSGVALIVGTMIGSGIFVSPSGLMVRTGSIGM<br>SFVIWIACGVVSLFGALAYAELGTMNPSNGAEYAYFMDAFGPIPAFLFSW<br>VSTLVLKPSQMSIICLSFAKYAVEAFVDECEPPELSVKLVSVLTILVILVNC<br>YSVNLATGVQNTFTA AKLFAILIIIVGGLYQLMKGN TKNLNMFEGTTSS<br>VGNLATAFYTGLWAYDGNLNYVTEEIKSPSKNVPRSIMISIPLVTICYV<br>LINLSYLAVMSPAEMVESEAVAVTFGNRILGLMAWLMPLSVTISTFGSAN<br>GTLFAAGRLCFAASREGHLLDILSYVHVRRLTPAPGLIFHSIIAIAMVMSG                                                                                                                                                                             |

|        |                                                                                                                                                                                                                                                                                                                                                                                                                                                                                                                                                                                                                                                                                                                                                                                                                                                                                |
|--------|--------------------------------------------------------------------------------------------------------------------------------------------------------------------------------------------------------------------------------------------------------------------------------------------------------------------------------------------------------------------------------------------------------------------------------------------------------------------------------------------------------------------------------------------------------------------------------------------------------------------------------------------------------------------------------------------------------------------------------------------------------------------------------------------------------------------------------------------------------------------------------|
|        | TINSLIDFFSFTAWIFYGGSMLAVIVMRYTRPNFPRPYKVPIIIPWTVLLISL<br>YLIVAPIIDSPQIEYLYASFFIFAGLLVYVPFVHYKVNCKCKMEKFTVFCQLL<br>LEVAPTNITYD                                                                                                                                                                                                                                                                                                                                                                                                                                                                                                                                                                                                                                                                                                                                                  |
| BtAPC5 | MKIPTIPGPGLFPTGDYKKDGLSLFAKLIRTKNVEGMDGEISLKRTEIKSD<br>KKLKLKCLTTLDTSLGVGSCVGTGMVYLVSGMVARNYAGPGVIVSFFI<br>AALASIFSGACYAEFGVRPHTTGSAYMYSYVTVGEFIAFVIGWNMILEY<br>LIGTSACACALSACFDALTSAGISKTVASVTGTIFGRPPDFLASIITVLMTIL<br>IAAGVKKSLVFNNVLNAINLAAWVFIMSAGLFYVNTDNWSQHKGFLPY<br>GWSGVFTGAATCFYAFIGFDIIATTGEEANNPKKSIPLAIVSSLVILMAYV<br>TSSMMLTLIVPYEEVDQDSGLVEMFGQVGAYKQCQYIVAIGALAGLTVSM<br>FGSMFPMPRVVYAMAQDGLIFRSLGQVLPFTGTPVFATFCSGAAAAIAAL<br>LIKLEVLVEMMSIGTLLAYTLVSTCVLILRYQPHTTNLMDLLPESLRTPLN<br>RSPSKENVGNGQAGKYGTTLPADNMKTSYSGVISQPPVTTLNNQHRV<br>MVRKVTRRSOSSPDSDDTYAGEEEDLSMRDDQFLVSDRNENKFYGSV<br>HAGSTQASAGIKPRFSYISHRLQAATYLCPAIFPWVDTGPATEESGMMVM<br>KYVLLLYILILFDLLIVCAMDSMGTFKLKLVLYILFASIIAVLALISRKPQNR<br>KALLFMTPCVPFVPGIAVAVNIYLIFKLSVLTIVRFTVWMTIGFGVYFYYG<br>IKHSSLEHEPDDDEDGLRGAEGGQONIEMKPPLSKATSPARQPVSAHPKQE<br>VKPEPPARPPTSRAAPLSQRSESLFVPPTEFPTWDD |
| BtAPC6 | MAEPGAAGAGTLNAPSSSAEARGSGVDGPVELKKEIGLLDGVAIVGVIV<br>GAGIFVSPKGVNIENAGSAGLGLIVWFLSGGLSMIGALCYAELGTMIPKSG<br>GDYAYINEAFGPLPAFLFLWVALMVILPSSNAITALTFAQYILQPIWPDCEP<br>PYLAVRLIAAVVCLLTAINCYNVKWVTKVQNVFTLTKIFALMTIILSGLW<br>LVVNGKTEKISRPFEGSNYDPGHLALSVSGLFSFAGWNYLNFVTEELKN<br>PYENLPKAICISLPLVTVVYLFTNVAYFVALTKDEILKSSAVAVTFANRLF<br>PMAWVMPLFVACSTFGGLNGAIFASARLFFVGARNHGLPKAIALINVKHS<br>TPVPSLIFMCSVTLCQMLIKDIYSLITYTVFVEALLTLFSITGLLWLRVKRP<br>NAQRPIKVNILPLIFFVICSFLVVLPIFVTPVEVGVGLAFIFSGIPIYLIFIYW<br>EQKPSWFRYIIDNFNLCAKLFRCVLEDTVETETKVS                                                                                                                                                                                                                                                                                                                             |
| BtAPC7 | MTPPKDGFELKKFLKNLCPEECRCEGKSRLNSESSNMYIEVFSGKK<br>AEEGKPAKGVQLQRELGLMSAVNLILSVMIGSGIFVSPTRALKEAGSIGM<br>ALIVWALCGTISMLGALSAYELGTVVNKSGAEYSYREAFGPLHKFWGP<br>LPSFINCWVSIVFVRPAEIAIIILTFAYFTQLLNPIIPPNEIDNYYDRKKIVAI<br>AALFIITAINFFSVKLYVKIQNIFSSFKVAACFLVIGCGLYYIFIGKTQNLNP<br>FKGSDLSPRAFAVAFYHGLWAYDGWSSVTTVTEEIKKPNKNIPRAVIAVP<br>LVTMLYCFMNVSYMTVLSVPELIQAKAVANEVGVKVLGHFSCLIPMGVA<br>LSTFGCALSVQFVTRLCYSAKNGHMMEIFSIVHVKRLTPAPAVLLQG<br>ALCLVCILAGDIITLIEFASFLVWTFYGLAMVALIVMRYTKKDVPWPVKV<br>PIVIFVMIIASCLAIIPIAMKPPQYLIAVGFLISGFVVYIPFIYFQKKLFGA<br>DMFTKAVKSVMNVPDQDQELIAKKTAKLNDQSDPKEALCVVSLLS<br>ETKDDSCCDEPCCDDSCHKKSCCDKSCLEKSCCNESCLEKSCCNESCLE<br>KSCCDESCPRQ                                                                                                                                                                                                   |
| BtAPC8 | MPGSRHKIIGHVFSGICTKMNRKQLSSGEEVMDTPLKRCCLNTFDITLLG<br>VGHMIGAGIYVLTGTVARDLAGPGIILSFILAGITSILAALCYAEFGARVPK                                                                                                                                                                                                                                                                                                                                                                                                                                                                                                                                                                                                                                                                                                                                                                     |

|         |                                                                                                                                                                                                                                                                                                                                                                                                                                                                                                                                                                                                                                                                                                                               |
|---------|-------------------------------------------------------------------------------------------------------------------------------------------------------------------------------------------------------------------------------------------------------------------------------------------------------------------------------------------------------------------------------------------------------------------------------------------------------------------------------------------------------------------------------------------------------------------------------------------------------------------------------------------------------------------------------------------------------------------------------|
|         | <p>AGSAYVYTYISVGEFVAFVIGWNIILEHMIGAASVARAWSGYVDSLLSGS<br/> ISAATVASIGELHEKWLG RYPDLLAFMVCISYALLLGIGVKSSAVVNSLLT<br/> LVNLSVMGLVIVIGFWYGKLENWNANNRGLFPYGFSGVVAGAATCFYAY<br/> VGFDSIATSGEEAQDPSFSIPVATALSMTLVSFGYILVSAALTLMVPYTMID<br/> ASAALPEAFSMMGLHWVKYAVTIGALCGMTTLLGSLFSLPRCMYAMA<br/> QDGLIFAFGLKINKTTQVPVNNLIISGLMSATIALLFDFLEKLVEFMSIGTLL<br/> AYTIVSASVIVLRYRPNTPPPSNDNVSVNDVYIMSPSPGVEEFKVCMMGR<br/> LKPSFDWLEPVVGVWCKPGEAVSVAVFIFTCFSALLCFHFHWATAQMENG<br/> AWWTVFGCVFLIAVMLFCLLVIEAHEQNRTGLTFMVPLVPYPALSILFN<br/> VELMANLNILTWLRFMIWMILGLLVYFLYGIHHSKENDTTSSYSVLMTSS<br/> EATKSKWGSIPAPVTIPVTRKRRSGKGDRQAIVNSDDDDTSSD</p>                                                                                          |
| BtAPC9  | <p>MTFMRGVIGTLTRIKVSDIVIDSDAPKLARVLDLFDLTLGVTTLGVG<br/> TYVLPGAVAKNTAGPAVTVCFIAA AVVSILAALCYAEFAARVPKAGSAYV<br/> YCYVTVGEFCAFIIGWNLLEFVIGTASVAKAFTGYVDALFGGGYASMM<br/> QSVMPMHVSFLAQY PDLMALCVVLLFSLLLAWGVKESTFINNIFTVN<br/> VTVVIVIFAGIYVSKMSNWFIDPAMIPPEHKAAGKGGFMPYGVSGVLA<br/> GAATCFYSFGGFDSICTTGEEAKNPQRTIPLAIVMTLAI VFAVYFGVSSVIT<br/> MAWPYYDQHIDAPFPYVFDK TGLHAIKWIVTVGALFALCTSMLGVAFPL<br/> PRILYAMSSDGLIYKFFSRINAYTQTPVLATLISGLLAGIMAAMFDLTQLID<br/> MMSIGTLMAYSIVALCVILLRYKEDESSVEDVSKKQNDFGSNKTEQYTF<br/> SVLSILSTEKESPTARTVFIARISTTIFCAVTIIQTLILVLSSESIFSAESFVSVL<br/> STLVVLANFVILGATMYVISLQPQSDTTYLKFRVPGVPVVPCCCIFMNTY<br/> LMAQLDFHTWVRFAVWLAVGFVIYFTYGIQHSVQGILDRQQAQKELKSQ<br/> PPPPAQMYK</p>             |
| BtAPC10 | <p>MFPPNVKVLTKFASV VTRLKSEDSVDLESNKPKPKLARVLTVLDLTALG<br/> IGSTLGVGSYVLPGEVARNTAGPAVTVSFFIAAVVSILAALCYAEFAARVP<br/> KAGSAYVYSYMTVGEFCAFVIGWNLILEYVIGTASVAKALSGYLDALTG<br/> KVFETYMLQHYP MNVSFLGPYPDLISFSVIMLLSFVLAWGVKESTMLNNI<br/> FTALNLTTVGIIIIAGITVAKPSNWFIAKEDLPVDPNSKYNPGE GFMFPFG<br/> WTGVLVGAATCFYSFIGFD CIATTGEEAKNPQKTIPLAIVLSLLIIFCVYFGI<br/> SAVLTMMWPYYDQDPAAPF SVFEKVGMPQVKWIVSVGAVFALCTSLL<br/> GSMFPMARILYAMAEDGLIYTFLAQINKKTLTPLFATFVSGVLAGIISAIFN<br/> LTQLIDMMSIGTLLAYSIVSLCILLR YRKYEISEETKPRNEPAVNHEEPK<br/> KEYPGFISGLLNLENERRATDFSEAI SKILIGTFCILCFMHVGG LILMERRM<br/> RFEINFWFKAYLIGV GILLVISVILLWRQPQANTEKLTFTAPLMPIVPTLSIY<br/> VNTYLMSKLDKATWIRFV VVLLLGLLVYMCYGLRHSKEGKNRFIAAEK<br/> KEKISKS</p> |
| BtAPC11 | <p>MYIEVFSGKKAEEGKPAKGVQLQRELGLMSAVNLILSVMIGSGIFVSPTR<br/> ALKEAGSIGMALIVWALCGTISMLGALS YAELGTVVNKSGAEYSY YREA<br/> FGPLHKFWGPLPSFINCVWSIVFVRPAEIAIIILTFAEYFTQLLNPIIPPNEID<br/> NYYDRKKIVAIAALFIITAINFFSVKLYVKIQNIFSSFKVAACFLVIGCGLYY<br/> IFIGKTQNLNPFKGS DLS PRAFAVAFYHGLWAYD GWSSVTTVTEEIKKPN<br/> KNIPRAVIIAVPLVTMLYCFMNVSYMTVLSVPELIQAKAVANEVGVKVLG<br/> HFSCCLIPMGVALSTFGCALSVQFGVTRLCYSAAKNGHMMEIFS YVHSKR</p>                                                                                                                                                                                                                                                                                                         |

|                               |                                                                                                                                                                                                                                                                                                                                                                                                                                                                                                                                                                                                                                                                                                            |
|-------------------------------|------------------------------------------------------------------------------------------------------------------------------------------------------------------------------------------------------------------------------------------------------------------------------------------------------------------------------------------------------------------------------------------------------------------------------------------------------------------------------------------------------------------------------------------------------------------------------------------------------------------------------------------------------------------------------------------------------------|
|                               | LTPAPAVLLQGALCLVCILAGDIITLIEFASFLVWTFYGLAMVALIVMRYTK<br>KDVPRPWKVPIVPIFVMIIASCLAIPIAMKPPQYLIAVGFLISGFVVYIPF<br>IYFQKKLFGADMFTKAVKSVMNVPDQDQELIAKKTAAQLNDDQSDPK<br>EALCVVSLSETKDDSCCDEPCCDDSCHKKSCCDKSCLEKSCCNESCLE<br>KSCCNESCLEKSCCDESCPRQ                                                                                                                                                                                                                                                                                                                                                                                                                                                                |
| BtAPC12                       | MTSRNATDVKAKLPVEVDDEKVQLKRKITLPNGVALIVGTIIGSGIFVSPT<br>GVFQYTGSSVGLVIWTLGIFSTIGALCYAELGTCISRSGGDYAYILEAFG<br>PLPAFLRLWSALLIIRPTTQAIVAITFAQYAAKPPFGDCKPPEQAVTILAAV<br>CLCLLTSINCLSVRWSMQVQSVFTTAKLFALAAIVFFGVGHILLGNTENFD<br>HAFDGDYNPANIALAFYSGLFAFGGWNYNLNFVVDDELQDPFKNLPRAIWI<br>AMPIVTIVYVTANLAYFAVVAHEMLTSPAVAVSFGDRMFGQARWAVPVF<br>VALSTFGGVNGILFTSARLFVTGAQEGHLPPIFSFIHVKRCTPIPSLLFTCF<br>MSLLMLCSTNVFVLINYSQVLWLSVGVCIAGLLYLRLHTKPDMPRPIRVH<br>TALPIMFLICCVFLVSPVVAEPFNTIVGLLIILSGVPVYYIGIKWKTKPFAL<br>KSAHNDFTVFLQKALFVLSPEESENPVSLCTTLVSNRQNLH                                                                                                                                                    |
| BtAPC13                       | MFPPNVKVLTKFASVTRKSEDSVDLESNKPKPKLARVLTVLDLTALG<br>IGSTLGVGSYVLPGEVARNTAGPAVTVSFFIAAVVSILAALCYAEFAARVP<br>KAGSAYVYSYMTVGEFCAFVIGWNLILEYVIGTASVAKALSGYLDALTG<br>KVFETYMLQHYPMNVSFLGPYPDLISFSVIMLLSFVLAWGVKESTMLNNI<br>FTALNLTGVIIIAGITVAKPSNWFIKEDLPVDPNSKYNPGEFGFMPFG<br>WTGVLVGAATCFYSFIGFDCIATTGEEAKNPQKTIPLAIVLSLLIIFCVYFGI<br>SAVLTMMWPYYDQDPAAPFSPVFEKVGMPQVKWIVSVGAVFALCTSLL<br>GSMFRWRGFYTLWLRMVLSTHFWRKSTRKHLMFPMARILYAMAEDGLI<br>YTFLAQINKKTLTPLFATFVSGVLAGIISAIFNLTQLIDMMSIGTLLAYSIVS<br>LCILLRKYRKYEISEETKPRNEPAVNHEEPKKEYPGFISGLLNLENERRAT<br>DFSEAIKILIGTFCILCFMHVGGILMERRMRFEINFWFKAYLIGVGILLVI<br>SVILLWRQPQANTEKLTFTAPLMPIVPTLSIYVNTYLMKLDKATWIRFVV<br>WLLGLLVYMCYGLRHSKEGKNRFIAAEKKEKISKS |
| BtAPC14                       | MTSRNATDVKAKLPVEVDDEKVQLKRKITLPNGVALIVGTIIGSGIFVSPT<br>GVFQYTGSSVGLVIWTLGIFSTIGALCYAELGTCISRSGGDYAYILEAFG<br>PLPAFLRLWSALLIIRPTTQAIVAITFAQYAAKPPFGDCKPPEQAVTILAAA<br>CLCLLTSINCLSVRWSMQVQSVFTTAKLFALAAIVFFGVGHILLGNTENFD<br>HAFDGDYNPANIALAFYSGLFAFGGWNYNLNFVVDDELQDPFKNLPRAIWI<br>AMPIVTIVYVTANLAYFAVVAHEMLTSPAVAVSFHLNTKFIKFTPVNSSL<br>PHWAQKLTGQRVMEGHPLLKSGKGEVKGAPYLESVSFGDRMFGQAR<br>WAVPVFVALSTFGGVNGILFTSARLFVTGAQEGHLPPIFSFIHVKRCTPIPS<br>LLFTCFMSLLMLCSTNVFVLINYSQVLWLSVGVCIAGLLYLRLHTKPDMP<br>RPIRVHTALPIMFLICCVFLVSPVVAEPFNTIVGLLIILSGVPVYYIGIKWK<br>TKPFALKSAHNDFTVFLQKALFVLSPEESENPVSL                                                                                                       |
| AaAPC1<br>(AAEL003<br>919-PA) | MTNEAENQLTGKDTGGGGKVVLRKITLVNGITIIIVGTIIGSGIFVSPAG<br>VFLYTKSVGSSVGLWCLSGILSTLGALCYAELGTCITRSGGDYAYLLVAFG<br>PLVGFLRLWMALLIIRPTTQAIVALTFAQYAVKPPFPECDAPDNSVRLAA<br>VCLCFLTAINCISTKWAMKIQNVFTMAKLTALISIILAGVWYLATEKTENF<br>ENAWEGDYALSSLAYASYSGLFAFGGWNYNLNFVTEELENPYKNLPRAIW                                                                                                                                                                                                                                                                                                                                                                                                                               |

|                               |                                                                                                                                                                                                                                                                                                                                                                                                                                                                                                                                                                                                                                                                                                                                        |
|-------------------------------|----------------------------------------------------------------------------------------------------------------------------------------------------------------------------------------------------------------------------------------------------------------------------------------------------------------------------------------------------------------------------------------------------------------------------------------------------------------------------------------------------------------------------------------------------------------------------------------------------------------------------------------------------------------------------------------------------------------------------------------|
|                               | IAMPLVTGIYVLVNLAYFAVVPRHDMLASIAVAVNFGNRVFGPVAWLIPVF<br>VAMSCFGGVNGILFTSARLFSTGAQEGHLPWFSLVHVNRQTPIPALIFTC<br>VTSILMLMTPNVVALINYFSQILWLSVAACIAGLLWLRVTKPNMPRPRIRVN<br>LALPIIFLTCCMVLVLLPSFSEPMNLIIGMAITLSGVPVYYVCVVWNKNKN<br>RSRNVLMQWIERGCQILFNAAFVDCHHDRKNDRELSDMQTSIVDEKNV<br>SE                                                                                                                                                                                                                                                                                                                                                                                                                                                     |
| AaAPC2<br>(AAEL014<br>161-PA) | MAKIAAGDALAPVEGFGEAPRSRVSTGASSRLRAEQSDSDGGIKLKKE<br>LGLMDGVAIIVGVIVGAGIFVSPKGVLLYSGSIGQAIIVWILSGVLSMVG<br>LCYaelGTmIPKSGGDYAYIGEAFGPLPAFLYLWVALLILVPAGNAITAITF<br>AQYLLQPLWPTCEPPYESVRLLAALITCLLTAINCYNVKWVTRVETFTG<br>MKVGALLVIVAAGAWYLFSGNTELLENPFENSKIQPGFIALAFYNGLFSY<br>SGWNYLNFVTEELKDPYRNLPRaICISMPAVTHIYVITNIAYFAVLPPDEML<br>SSQAVAVTFADKMLGFMAVVMPLFVACSTFGSLNGAIFASSRFFVVGARN<br>GHLPAaislinvNCLTPIPslifLCLLTLFFFIRDVFSIINYVSYVEILFIFISV<br>AGLLRLRKKHPDAKRPIKVSIIPIIFLLTAGFLVIFS VFESPTevaIGTLIIVL<br>GIPVYYITIHKPLEWLAQTSQRINNVCaKLFCLCMPNTEKND                                                                                                                                                                            |
| AaAPC3<br>(AAEL008<br>406-PA) | MTVVKAAPTSGGLKREMGMSAINVIISVMIGSGIFVSPtaALKYSGSVG<br>FCLVWAVCGIISLLGALCfaELGTVVPRSGAEYAYLIEAFKKTnkFWGP<br>LPSFICAWVYVVVLRPAEIAVIILTfaEYSILPFSNLLGLKSLPEEDLHNLK<br>LIALLGLGVITYINLSSVKLYVTINNIFGFCKVfaCLIVIFGGIYQLAIGNTE<br>NLSRGfAGTNFSPGHIALAFYNGLWAYDgWSSVTTITEEIKRPEVNIPRSIII<br>AVPIITGLYVFMNMAYMTVLSPEEMIQSEAVGLDFGDRVLGSFSFLIPLGV<br>ALSTFGCALSIQFGVTRLCYVASQEGQMLEPLSYIHVRRATPTPAVAMQGI<br>LAFaFILVGNIEELIELASFLIwFFYGSaFIALLTLRKTQPDTPRPYKVPFV<br>PIFALGVSIFLSVVPiIAEPSPKYFFAVaFILSGVAVYTPFVYYKIRPKWMNK<br>LTYLIQVLFaVPTAEKFE                                                                                                                                                                                                  |
| AaAPC4<br>(AAEL009<br>358-PA) | MPSARRMILGHVMSGLCskMNRtkQLPADLMETPLNRClnTFDITLLGI<br>GHMVGAGIYVLTGTvAREMAGPGIVLSFILAGMVSMlaALCYaEFGTRV<br>PKAGSAYVYTYVSIGEFwAFVIGWNIIEHMLGAASVARAWSGYVDSML<br>GNIVANTTMEITGEMHEKLLAKYPDFLAFGVCMSYAIAlaAGVKATAMI<br>NSILTTVNVVMSLVVVLGFWYATPANWslPEQGFLPFGGGVLAGAAT<br>CFYAFVGFDSIATSGEEAKPNVSIPLATILSLCVVTIGYVLVsaALTLMIP<br>YNEINpAAALPDAFGTRGIawAKYAISTGAICGMTTTLGSLFALPRCLYA<br>MASDGLLFSCFGKVNTKTQVPLLNlavSGLCSALLALLFDLEKLVEFMSI<br>GTLLAYTIVSASVIVLRYRPISVEETVHLAPDTPGTDEEENPSSSSQSSAVD<br>PSSPTSEMIEIALAGRLRPQFRWLEPILGRCEPGVACSGAVLLFCVLSVAVC<br>FQLEVSWDELYDGTWWALGLYGfLLfCLVACIVVISaHHQNTRGLQFKV<br>PLVPYIPALSIFCNIELMVHLSFLTWLRFFIWLSIGMLVYFLYGIRNSKEGEL<br>GTSYSMLMSTQEAIRGWGATHSAGLSGGTRVTVTKIVKGRVSRKSVDKQ<br>AIIDDDDDDS |
| AaAPC5<br>(AAEL009<br>362-PA) | MSTPSCWKILTRKKILSIEADGAADNGKLGRILNTYDLTALGVGATLGVG<br>VYVLAGHVSKDQAGPSVVLsFLIAAAASFLAGLCYAEFGARVPKSGSAYI<br>YSYVCIGEFMAFVIGWNLmLEYIIGSASVSRGLSLYIDTLANDTMKIRFRE<br>IAPMEWDFMSSYFDFFGFSVAILLgVALAFGLKkSTMVNNFFTVLNIGIVL                                                                                                                                                                                                                                                                                                                                                                                                                                                                                                                 |

|                               |                                                                                                                                                                                                                                                                                                                                                                                                                                                                                                                                                                                |
|-------------------------------|--------------------------------------------------------------------------------------------------------------------------------------------------------------------------------------------------------------------------------------------------------------------------------------------------------------------------------------------------------------------------------------------------------------------------------------------------------------------------------------------------------------------------------------------------------------------------------|
|                               | FVIIAGALNADISNWNVNPNANVSTIYNVGEFFPFGFEGTLRGAATCFFG<br>FVGFDCIATTGEEVKNPRKAIPRAILLSLCTIFLAYFGVSTVLTLMWPYYK<br>QDVNAPLPFVFNEIGWTYAKWTVAIGGIIGLVASLFGAMFPQPRIIYAMAQ<br>DGLVFKALGKVSSRFKTPVFGTLCAALLTGTMAGLFDLKAALVNMLSIGT<br>LMAYTVVAISILILRFSEAPQTASIPSTSKQVFESSNLLRSGGRLTGSAFMR<br>QLFNISCVRIPSHASTSVVGVLTLYCLVSLALSILTIFYAKQPLYDMEPWA<br>LTLAGTLLGLLLLLILLMSIQPRETAEAPFKVPFVPLLPASIFVNIYLMML<br>DVYTWIRFGIWMGIGLALYAFYGFNSYRDVYSCRPGWTKLKYGH                                                                                                                                   |
| AaAPC6<br>(AAEL002<br>063-PA) | MTVVKAAPTSGGLKREMGMSAINVIISVMIGSGIFVSPTAALKYSGSVG<br>FCLVWVAVCGIISLLGALCFAELGTVVPRSGAEYAYLIEAFKKTNKFVGP<br>LPSFICAWVYVVVLRPAEIAVILTFEAYSILPFSNLLGLKSLPEEDLHNLK<br>LIALGLGVITYINLSSVKLYVTINNIFGFCKVFACLIVIFGGIYQLAIGNTE<br>NLSRFGAGTNFSPGHIALAFYNGLWAYDGWSSVTTITEEIKRPEVNIPRSIII<br>AVPIITGLYVFMNMAYMTVLSPEEMIQSEAVGLDFGDRVLGSFSFLIPLGV<br>ALSTFGCALSIQFGVTRLCYVASQEGQMLEPLSYIHVRRATPTPAVAMQGI<br>LAFAFILVGNIEELIELASFLIWFFYGSAFIALLLTRKTQPDTPRPYKVPFV<br>PIFALGVSIFLSVVPPIAEPSPKYFFAVAFILSGVAVYTPFVYYKIRPKWMNK<br>LTYLIQVLFEAVPTAEKFE                                          |
| AaAPC7<br>(AAEL010<br>988-PA) | GTSSVARGMSGYIDELAGKKISTALKETMGMNVDFLSDYPDFFSFVVVLI<br>LAALLAYGVKESTLMNIFTGVNLCVIAIVLVAGGMNCDPANWMIKPED<br>IPKGIDAGVGGFAPYGFAGIMAGAACKCFYGFVGFDCIATTGEEAKNPSRN<br>IPLAIVISLIIIFLAYFGISTVLTMALPYLQNPDAPPHLFEQLEWHAIKWI<br>VSIGAI FALCTSLGAMFPLPRVLYAMSTDGIIYKLRVHVKPTQTPVLATI<br>LAGLLAATMAMLFNLQQLIDMMSIGTLLAYTIVAVSVLVRLYEDQTMQ<br>SATVTIPNVFRQVFNVDKLKSPTLSSSIVKFGICIFGTIFIQINGISSTDELS<br>AEYPGTLAAISVLGACMVFLIIVTALQPTENTKLTFKVPLVPLLPMLSVFF<br>NLYLMFQLDAGTWVRFVAVWVIGYLIYFMYGIKHSVE                                                                                       |
| AaAPC8<br>(AAEL002<br>525-PA) | MVLKQRGA AIELHSPTEDVLVSPGTESLPP IENGATAGSGTIDGGGNERV<br>KMKKELGLLEGVAIILGIIFGSGIFSPKGV LQEVGAVGTSLVIWVTCGLLS<br>MIGALCYAELGTAIPKSGGDYAYIYEAYGPLPAFLYLWDATVIFVPSTNAI<br>MGLTFASYVFQPLFAAGCSVPTIGLQLFAAVTICLLTYINAYDVRVTTKMQ<br>NVFMFTKIGALVLVIVGVVWMSLGGTENFENAFENTETDPGKLAVAFYS<br>GIFSYAGWNYLNFMTTEELRDPYKNLPRAIYISLPLVTGIYVLANMAYVAV<br>LSPQQILSSDAIAVTFAQKAMGWGAFVMPILVAISAFGGLSVHIMTSSRMC<br>FVGARNGHMPEILSHINVNRYTPMPSLVFLCLLSLLYLFISDVYVLITYSSI<br>VESFFIMLSVSAVLYFRYTRPDINRPIKVQLWVPTLFVIICAFILIVPCYVAP<br>YEVGMGVLLTLAGIPVYYVGVAVWKNKPEFENVLRRATQFCQKMFMTA<br>KEENDDEE |
| AaAPC9<br>(AAEL011<br>654-PA) | MKFSIPLPGGGTGLTLFSKLVRTKDLRKLQGEDPKSTKPKLTKCLTTDLT<br>SLGVGSCCGTGMVYLVAGMVARNIAGPGVVL SFIIA AIASIFSGACYAEFGV<br>RVPHTSGSAYMYSYVSVGEFVAFVIGWNMILEYLIGTSACACALSASFDS<br>LSGGAISRSIASAVGTIFGRPPDFIAFGITLMMTFVLALGASKSVLFNNVLN<br>TVNLA SWVFILTAGMFYVDTATWSEHEGFLPYGWSGVFTGAATCFYAFI<br>GFDIIATTGEEAHNPQKSIPKAI VGSVLVIVLFVYVTSSFILTLTPYDHIDTG                                                                                                                                                                                                                                     |



|                                |                                                                                                                                                                                                                                                                                                                                                                                                                                                                                                                                                                                                                                                                                                     |
|--------------------------------|-----------------------------------------------------------------------------------------------------------------------------------------------------------------------------------------------------------------------------------------------------------------------------------------------------------------------------------------------------------------------------------------------------------------------------------------------------------------------------------------------------------------------------------------------------------------------------------------------------------------------------------------------------------------------------------------------------|
|                                | SALVQMWTYVVGAPKCRALVALGATAGLSVAMFGSMFPMPRVIYAMAQD<br>GLVFRMLSQWTRTGVPGLATIGSGLAASLVALTVRLEVLVEMMSIGTLL<br>AYTLVSTCVLVLRYQPHSTTLVDLLPAQLRTPQPPSTPDPTTQQRVKGNVL<br>VKKITRGSPPSDDSFADDSFDGFMGRDDQFLVSDKSENKQFYGAVHGAPQ<br>GGSNPFTLWGFYSYIGRQIEQYSYLCPLFPWVNPMPATHESGMFVTKMV<br>GLMYACIFFLDLMAIGITGTFSLVYTALVLGILGILLIISRQPQNRYALPF<br>LTPGLPFIPTIAITVNIYLIFKLSILTTLVRFTVWMSLGLIMYFYYGITHSSLEN<br>PSEEFELTVDGNGQQPPSGQKTNLKVPSQSNHREQTAVWDRHGYENRM<br>ATNDDGSELQWGTSNSSWNPDAWGDTTIYDPPRQQQPPVPQRSSHQYE<br>STNIFQPPPTQQRPEAKKDGFGMFYQETPSYPTWDD                                                                                                                                                          |
| AaAPC10<br>(AAEL002<br>557-PA) | MEDDSLKDKDIRKDSVKSATSNGTAGGGDGEITLKPMTLVNGVTIVVSGI<br>IGSGIFVSPTGVLINTGSVNMSLIVVLSGLFSMVGAYCYAELGTMIKKS<br>GADYAYIMETFGPFLAFIRLWIECMIVRPCSQAIVALTFVYVVKPFFPECQ<br>PPDDAARLLAVCCILVLFVNCWDVKWATAVQDIFTYAKLLALFIIIGAGA<br>YFLFKGNTEHFTFENTKTEVTSLALSFYSGLFAYNGWNYLNFIIIEELKDPV<br>KNLPRAIAISCTLVTVVYVFTNVSFYTVLSPEEVLGSAVAVTFADRFGM<br>FAWTIPVFVALSTFGAVNGILLTSSRLFYAGACEGQMPEILTMIIQRLTPTP<br>AVLIMALLSMVYLTVSDIFALINYVGFATWLSIGVAVLCLPWLWRWAQPNL<br>ERPIKVNLIPIFYLIATVFVTVVPMIASPVETGYGLLMILTSIPVYCFIAWR<br>NKPKWFNHTMGFTQSLQKLMVVRPKQK                                                                                                                                                             |
| AaAPC11<br>(AAEL012<br>129-PA) | MEDSVYSKLSFNDSYFVPGIGHMVGAGIYVLTGTVAREMAGPGIVLSFI<br>LAGMVSMLAALCYAEFGTRVPAKGSAYVYTYVSIGEFWAFVIGWNIILE<br>HMLGAASVARAWSGYVDSMLGNIVANTTMEITGEMHEKLLAKYPDFLA<br>FGVCMASYAIALAAGVKATAMINSILTTVNVVMSLVVVLGFYATPANW<br>SLPEQGFLPFGFGVLAGAATCFYAFVGFDSIATSGEEAKNPVNSIPLATIL<br>SLCVVTIGYVLVSAALTMIPYNEINPAAALPDAFGTRGIAWAKYAISTGA<br>ICGMTTLLGSLFALPRCLYAMASDGLLFSCFGKVNTKTQVPLLNLAVSG<br>LCSALLALLFDLEKLVFMSIGTLLAYTIVSASVIVLRYRPISEETVHLAP<br>DTPGTDEEENPSSSSQSSAVDPSSPTSEMIEIALAGRRLPQFRWLEPILGRC<br>EPGVACSGAVLLFCVLSVAVCFQLEVSWDELYDGTWWALGLYGFLFCL<br>VACIVVISAHHQNTRDLQFKVPLVPYIPALSIFCNIELMVHLSFLTWLRFFI<br>WLSIGMLVYFLYGIRNSKEGELGTSYSMLMSTQEAIRGWGATHSAGLSG<br>GTRVTVTKIVKGRVSRKSVDKQAIIDDDDDDS |
| AaAPC12<br>(AAEL012<br>128-PA) | MDKFFKALCRKKPNDGSHSKLARVLTLLDLTGLGVGSTLGLGAYVLA<br>GSVAYEQAGPGVVVSFVIAAVAAAIAAGLCYAEFAARVPKAGSAYIYTYITI<br>GEFAAFTIGWNLMLEYIIGTASVARGLSGYIDALIDHRMEKALQSIVEFRV<br>SFLGKHPDIFSFFVLTITALLAYGVKESTVLNNIFTGVNLMVIVVVLISVG<br>TKVNPDNWNKPEDIPEGVKGGVGGFMPYGLAGVMAGAAKCFYGYVG<br>FDCIATTGEEARNPSRNIPLAIIIFSLIIFLSYFGVATVLTMALPYYNQDPKA<br>PPPNLFLNGLGWQEIKWIVSIALVTCIVSAILVNAQDYLSAQYPLNLITLIL<br>AMSILILFLVIACQPTEESKITFKVPLVPFVPMLSILVNIYLMFQLDVNTWIS<br>FSIWLLVGFVIYFTYGIRHSVLGSGSQTLSQSLENPFCMVGLEKA                                                                                                                                                                                                  |
| AaAPC13<br>(AAEL012)           | MRQGGRIDRFWIALTRKKRNEDDGSQSLARVLSLLDLTGLGVGSTLGL<br>GVYVLAGSVAYEQAGPAVVISFLVAAVASAIALCYAEFAARVPKAGSAYI                                                                                                                                                                                                                                                                                                                                                                                                                                                                                                                                                                                              |

|                                |                                                                                                                                                                                                                                                                                                                                                                                                                                                                                                                                                                                                                                                                                                                                             |
|--------------------------------|---------------------------------------------------------------------------------------------------------------------------------------------------------------------------------------------------------------------------------------------------------------------------------------------------------------------------------------------------------------------------------------------------------------------------------------------------------------------------------------------------------------------------------------------------------------------------------------------------------------------------------------------------------------------------------------------------------------------------------------------|
| 131-PA)                        | <p>YSYVSI GEFAAFTIGWNLILEYVIGTSSVARGMSGYIDELAGKKISTALKE<br/> TMGMNVDFLSDYPDFFSFVVVLILAALLAYGVKESTLMNIFTGVNLCVI<br/> AIVLVAGGMNCDPANWMIKPEDIPKIDAGVGGFAPYGFAGIMAGAACK<br/> FYGFVGFDCIATTGEEAKNPSRNIPLAIVISLIIIFLAYFGISTVLTALPYYL<br/> QNPDAFPFHLFEQLEWHAIKWIVSIGAIFALCTSLLGAMFPLPRVLYAMST<br/> DGIIYKLRVHPKTQTPVLATILAGLLAATMAMLFNLQQLIDMMSIGTL<br/> LAYTIVAVSVLVLRVEDQTLMQSATVTIPNVFRQVFNVDKLSPTTLSSSI<br/> VKFGICIFALLVCAVCTILVLATDELSAEYPGTLAAISVLGACMVFLIIVTA<br/> LQPTENTKLTFKVPLVPLPMLSVFFNLVLMFQLDAGTWVRFVAVWIVIGY<br/> LIYFTYGIKHSVEGAIKQAAVNGNGITIVKNGIDNNAFDGSDNDFVSTV<br/> PAENPRKSSKNSYSLNNE</p>                                                                                                                                 |
| AaAPC14<br>(AAEL003<br>387-PA) | <p>MACGLLSLLGALAYAELGTMNTSSGAEWAYFMDAFGAWPAFLFSWVST<br/> LVLKPSQMAIICLSFAQYAVEAFVAECDPPLTVVKMVAILAIVSILFVNCYS<br/> VNLGMAVQNIFTSAKLVAVLIVICGGAYKLFQGNTOHLQNAFSGPTPSLG<br/> AIATAFYTGLWAYDGNLNYVTEEIQNPSKNLPRSIIGIPLVTLCYALIN<br/> VSYLAAMSATEMIESEAVAVTFGNRILGALAWLPLSVTISTFGSANGTLF<br/> AAGRLCFAASREGHLLDILSYVHVRRLTPAPGLIFHSLIAGAMVLYGTIDS<br/> LIDFFSFTAWIFYGGAMLALIVMRYTKPNYPRPYKVPLIIPILVMVISGYLV<br/> AAPIIEKPQIEYLYAVVFIFAGLIFYVPFVHWGYHPKFMDNFTLFFQMLFE<br/> VVPTTSMAMFD</p>                                                                                                                                                                                                                                                       |
| AmAPC1<br>(XP_00655<br>7900.1) | <p>MPSVRRMILGHVMSGLCTKMNRTKKLQGDLETPMKRCLSTFDITLLGI<br/> GHMVGSRIYVLTGTVARDTAGPGVLSFLLAGIASLLAALCYAEFGARIP<br/> KAGSAYVYTYISVGEFWAFVIGWNIIEHMIGAASVARAWSEYVDSL<br/> GSGISNYSRRIMHGYTMAEPLGSPDVLAAALCLFYAMLLTLGVKSSATV<br/> NSLLTLVNLGVMGLVIGLGFAYAKLSNWSCEHGGFLPYGFTGVLAGAAT<br/> CFYAYVGFDSIATSGEEARDPAYSIPRATLFSMTIVTVGYVLVGAALTLVIP<br/> YWKINPTAALPEAFSSIGIPWAKYVISIGALCGMTTTLFGSLFSLPRIMYA<br/> MANDGLLFGFLGHINNRTQVPVLNLAISGFLSALIALLLFDLQHLVEFMSIG<br/> TFLAYTIVSASVILRYRPEKVTSPSNAGTPSSLTSPTEGADSNDCNSVT<br/> SAESELLDLSEGTGKLKSRYIWLANFLGSKPGDVVTGSMIYTAGCISL<br/> CFLFILISQTYFAPALWDYFVLANVILLLIGSLFVIAHQSPPTGKFRVPM<br/> VPVIPALSILFNIGLMFHLSLLTFLRFLVWMVVGMLIYFLYGIHYSKEAAS<br/> PNSYSILMATSEAGRGAKWGATLRVNQKSDKVPILNEEDFVH</p> |
| AmAPC2<br>(XP_00655<br>8911.1) | <p>MKLELMDREKGLELFGKFIRTKNVEQLQDDQEKTPPELHPTDSKQKLQ<br/> KCLTTLDLTS LGV GSCVGTGMYLVAGMVARSVAGPGVVISFIIAASIFS<br/> GACYAEFGVRVPHTTGSAYMYSYVTVGELIAFIIGWNMILEYLIGTSACA<br/> CALSACLDALTDGAVSGAIANSVGTIFGRPPDFLAFVITILMMLLMAAGV<br/> KKS L V F N N V L N A I N L A I W V F V M T A G M Y Y V D I D N W N E H G G F F P Y D W S G<br/> VFTGAATCFYAFIGFDIATGEEATNPKRSIPLAIVSSLIIILTAYVTSSMML<br/> TLIVPYDEVDQDSALVEMFGQVGAYKCKYIVAVGALAGLTVSMFGSMFP<br/> MPRIVYAMAQDGLIFKLSQVWPITGTPAIATLTSGVCAAMAALLIQLEV<br/> LVEMMSIGTLLAYTLVSTCVLILRYQPHSTNLVELLPQSLRTPCRSPTKEN<br/> QGNGQAAQSDLAAANSQQRIMVRRVRRCNSSSPDSDDTYGAEEDEVGL<br/> GKDDQYLVSDRTENKFYGSVHAAAAASSCGSTHQYPGNTPIIGPPLNYL</p>                                                             |

|                                           |                                                                                                                                                                                                                                                                                                                                                                                                                                                                                                                                                                                                                                                                                               |
|-------------------------------------------|-----------------------------------------------------------------------------------------------------------------------------------------------------------------------------------------------------------------------------------------------------------------------------------------------------------------------------------------------------------------------------------------------------------------------------------------------------------------------------------------------------------------------------------------------------------------------------------------------------------------------------------------------------------------------------------------------|
|                                           | <p>QRRLQAAQYLCPAIFPWVDRGPATEASGRYVMKLVGILYLLIVFDLIVVC<br/> GMGHMGFTTLLMFAFLFAIIGILLAISRKPQNRNSVMFMTPGLPFVPAIA<br/> VTVNIYLIFKLSILTIVRFTVWMLGFIMYFYYGIKHSTLEERNASDNLEET<br/> VSAGNIELTVTDTQKQQQQQPSYTTTDRSIYESQQLDAFGQPVFGSTNF<br/> GGTPSQRPVISGQSSLFIDQESFPTWDD</p>                                                                                                                                                                                                                                                                                                                                                                                                                           |
| <p>AmAPC3<br/> (XP_00656<br/> 0702.1)</p> | <p>MRNTYGTFRMSKSGSIKDGEKGPYDPVPSTDKGNDEIKLEAKMSLLNG<br/> ITVIVGSIIGSGIFVSPTGVLKYTGSVNASLLVWTASGIFSTVGAYCYAELG<br/> CMIRKSGADYAYIMETFGPFLAFIRLWVECMIVRPCSQAIVALTFSVYVLK<br/> PVFPDCAPPDDATRILAACCICILAFINCWDVKWATRVDIFTYAKLLALFI<br/> IIFTGAYQLFTGHTEYFTFDNTKTEVTSIALSFYSGLFAYNGWNYLNFHIEE<br/> LKDPVKNLPAIAISCVLVTTVYVFANMAFYTTLSPEVLGSEAVAVTFA<br/> NRLFGMFAWTIPVFVALSTFGAVNGILLTSSRLFYAGACEGQMPEILTMIQI<br/> SRLTPPAVLCMTLLSMLYLCSDDIFALINYVGFATWLSIGVSVLCLPWLR<br/> WSQPNSRPIKVNLFPIIYILATLFTIVPMYASPVETGYGCLMILSSIPVY<br/> FIFIAWKNKPKFFQKGVGAVTKTLQKMMVVVGPKTK</p>                                                                                                                       |
| <p>AmAPC4<br/> (XP_00656<br/> 8546.1)</p> | <p>MYEVTVGHDPQTSNGNQSQQQLQSGSWGNGIPETTLVSRIRSNGNSNG<br/> WNPITSPFQRQPEQQQLHERKQKEIKSGDLGDDDEDGGGGGGGLEGTDPE<br/> ENNSVHLKRRVGLVSGVALIVGTMIGSGIFVSPSGLLVRTGSIGISFLVWTA<br/> CGMLSLCGALAYAELGTMNTSSGAEYAYFMDAFGAPPAFLFSWVSTLVL<br/> KPSQMAIICLSFAQYAVEAFAADCDPPEEVVKIVALLAIILILLVNCYSVNL<br/> ATGVQNAFTAAKLIAILVVIAGGSYKLIQGNTQHLKGAFDTFDGSTVNIG<br/> RLATAFYTGLWAYDGNLNYVTEEIKDPSKNLPRSIMIGIPLVTLCYALI<br/> NVSYLAVMSPSEMIESEAVAVTFGNRILGVMAWLMPLSVAISTFGSANGT<br/> LFAAGRLCFAASREGHLLDCLSYVHVRFTAPAGLIFHSLVAGAMVISGNI<br/> DSLIDFFSFTAWIFYGGAMLALLVMRTRPNHPRPYKCPLIIPVLVLGISAY<br/> LIIAPIIDKPQIEYLYAAGFILAGMLVYLPFVKYGYVPKFMEGVNAFLQML<br/> LEVAPTAADF</p>                                   |
| <p>AmAPC5<br/> (XP_00657<br/> 0076.1)</p> | <p>MASRLWKALSRRRIDENLENKSELARVLGLFDLTALGVGSTLGLGVYVL<br/> AGSIKETAGPAVCISFLIAIASGFAGMCYAEFASRVPKAGSAYVYSYVT<br/> VGEFIAFIIGWNLILEYIIGTASVARGLSNYLDALIGNVISETLHSLMPISVS<br/> FLSEYPDFFAFTVVILLIILSVGVKESILNNIFTVINLMTILIIIIAGSIKADP<br/> ANWRISINDIPESEQQHAGSGGFMPFGISGVMIGAACKCFYGFVGFDAVAT<br/> TGEEAKNPQRNIPIAIVVSLIILMAYFSISTVLTMMWPYYDQNADAPFPY<br/> VFDKIGWPTVKWIVNIGAAFALCTSM LGAMFPLPRILYAMGNDGIIIFKRL<br/> ANVHPKTMTPIFGTVVSGLFTGIMTLIFNLQQLIDMMSIGTLLAYTIVAISV<br/> LILRYQGKECTSNTQSITPIDGYKLTPMNILKQIVNLQNQKEVTEMSIKVA<br/> KYSIAILCVVIFITAFFISYVDTEVFGKNVIESVILILVNILLIIIIARQPVHE<br/> TDLAFKVLVPLLPCCSIFINLYLMLQLDAFTWMRFSIWMVIGLTIYFFYGI<br/> SHSEQGKKDKIEAEMIKRKYADQVRIVTRF</p> |
| <p>AmAPC6<br/> (XP_00657<br/> 0492.1)</p> | <p>MKLSKIFYWMMFITCYLSFSHALECYVCTDQEGNKEKCLKSTKICEQHQ<br/> DTCLTEIKWGSTPYWSQGAKKQYVYSKRCSTKKECERIKRANMDDCTYI<br/> WYQDWKCSGCCQGDKNYVVISMIWKLKTLTKMFSRKKEVDYSQDTR<br/> LARCLSTDLTALGIGSTLGVGVYVLAGSVSKTIAGPAVIVSFAIAAIA SMF<br/> AGLCYAEFGARVPRAGSAYIYSYVTMGEFTAFLIGWTLILEYVIGSASV</p>                                                                                                                                                                                                                                                                                                                                                                                                          |

|                             |                                                                                                                                                                                                                                                                                                                                                                                                                                                                                                                                                                                                                                                                                                                                                                                                                                                                                                                    |
|-----------------------------|--------------------------------------------------------------------------------------------------------------------------------------------------------------------------------------------------------------------------------------------------------------------------------------------------------------------------------------------------------------------------------------------------------------------------------------------------------------------------------------------------------------------------------------------------------------------------------------------------------------------------------------------------------------------------------------------------------------------------------------------------------------------------------------------------------------------------------------------------------------------------------------------------------------------|
|                             | RGLSTYVDALFNNTMRNAFETA AHIDIDLSSYPDFFAFGITLIFSAALAF<br>GAKESSVANNFFTLTNLSVVLV VIIAGSLKANINNWKTKPTCTTENCKY G<br>NGGFMPYGIAGVISGAATCFY GFIGFDCVATTGEEAKDPQKSIPIAIVASLT<br>VVFLSYFGVSTVLT TVLPYFEQNE DAPPELFD RIGWNWAKWLV TIGAIC<br>GLCSSLLGAMFPLPRIIYAMASDGLIFEWMGKVSSRFHTPLMGTF SAGILT<br>GLLAAIFELTQLVNMMSIGTLLAYSIVATCVLILRYE ESEAYQKKGDRDPR<br>TLKFIARQLINANGLNHSTKLTSQIVTYLVV CYVILCICIGITISIFTDEIMN<br>GKITLIVPLTILLLALV VILVFIYLQPTSGKNLAFSVPLVPFLPAFSIIINIYLM<br>MMLDKMTWIRFLIWM TVGLGIYFFYGVWH SKMRKDKHTKLPENGYNE<br>DTWKTNDSSMHK                                                                                                                                                                                                                                                                                                                                                                           |
| AmAPC7<br>(XP_39307<br>1.3) | MKLELMDREKGLELFGKFIRTKN VESLQDDQ EKTGPEPLHPTDSKQK LQ<br>KCLTTLDLTS LGV GSCVGTGM YLVAGMVAR SVAGPGVVISFIIA IASIFS<br>GACYAEFGVRVPHTTGSAYMYSYVT V GELIAFIIGWNMILEY LIGTSACA<br>CALSA CLDALTDGAVSGAIANSVGTIFGRPPDFLAFVITILMMLLMAAGV<br>KKSLVFNNVLNAINLAIWV FVMTAGMY YVDIDN WNEHGGFFPYDWSG<br>VFTGAATCFYAFIGFDIIATTGEEATNPKRSIPLAIVSSLIIL TAYVTSSMML<br>TLIVPYDEVDQDSALVEMFGQV GAYKCKYIVAVGALAGLTVSMFGSMFP<br>MPRIVYAMAQDGLIFKLSLQVWPITGTPAIATLTSGVCAAMAALLIQLEV<br>LVEMMSIGTLLAYTLVSTCVLILRYQPHSTNLV ELLPQSLRTPCRSPTKEN<br>QGNQVNYGKELRPDQLTTALNSVQAAQSDLAAANSQGRIMVRRVRR C<br>NSSSPDSDDTYGAE EDEVGLGKDDQYLVS DRTENKFGSVHAAAAASSC<br>GSTHQYPGNTPIIGPPLNYLQRR LQAAQYLCPAIFPWVDRGPATEASGRY<br>VMKLVGILYLLIVIFDLIVVCGMGMHGTFTTLLMFAFLFAIIGILLAI SRKP<br>QNRNSVMFMTPGLPFVPAIAVTVNIYLIFKLSILT LVRFTVWMILGFIMYF<br>YYGIKHSTLEERNASDNLEETVSAGNIELT VTD TQKQQQQQQPSYTTDR<br>SIYESQQLDAFGQP VFGSTNFGGTPSQRPVISGQSSLFIDQESFPTWDD |
| AmAPC8<br>(XP_39314<br>4.3) | MASRLWKALSRRRIDENLENKSELARVLGLFDLTALGVG STLGLGVYVL<br>AGSIAKETAGPAVCISFLIAAIASGFAGM CYAEFASRVPKAGSAYVYSYVT<br>VGEFIAFIIGWNLILEYIIGTASVARGLSNYLDALIGNV ISETLHSLMPISVS<br>FLSEYPDFFAFTV VILLIILLSVGVKESSILNNIFTVINLMTIL IIIIAGSIKADP<br>ANWRISINDIPESEQQHAGSGGFMPFGISGVMIGA AAKCFYGFVGFDAVAT<br>TGEEAKNPQRNIPIAIVVSLIILMAYFSISTVLTMMWPYYDQNADAPFPY<br>VFDKIGWPTVKWIVNIGAAFALCTSM LGAMFPLPRILYAMGIMTLIFNLQ<br>QLIDMMSIGTLLAYTIVAISVLILRYQGKECTSNTQSITPIDGYKLT PMNIL<br>KQIVNLQNQKEVTEMSIKVAKYSIAILCVVIFITAFFISYVDTEVFGKNVIE<br>SVILII LVNILLIIIIARQPVHETDLAFKVPLVPLLCCSIFINLYLMLQLDA<br>FTWMRFSIWMVIGLTIYFFY GISHSEQGKKDKIEAEMIKRKYADQVRIVT<br>RF                                                                                                                                                                                                                                                                     |
| AmAPC9<br>(XP_39377<br>7.2) | MEQVGKKGNEKIALKRELGLFSAVGMIVAVMIGSGIFVSPTSALERSGSV<br>GLCLIVWISCGLLSLLGALAFaelstVVPRSGAEYAYFIEAFSPLHQYAGQI<br>PAFICSWVYVMVLRPTEVAVIMLTF AEYSVQPFSGYLENLSEEW MFRLKK<br>LIAILALGLITYINLTSVKLYVKVQNIFTVCKIVACIFVICGGIWWLCTGHT<br>ELLEKPFHGTTTSAGNVALAFYSGLWAYD GWTSAAIVTEEIQKPEINILRS<br>ILIGVPLITILYVSMNLMYMAALTIPEMVRAPAVAVLWAKKVLPSWLG FVI                                                                                                                                                                                                                                                                                                                                                                                                                                                                                                                                                                         |

|                                |                                                                                                                                                                                                                                                                                                                                                                                                                                                                                                                                                                                                                                                                  |
|--------------------------------|------------------------------------------------------------------------------------------------------------------------------------------------------------------------------------------------------------------------------------------------------------------------------------------------------------------------------------------------------------------------------------------------------------------------------------------------------------------------------------------------------------------------------------------------------------------------------------------------------------------------------------------------------------------|
|                                | PLGVAISTFGCSLSIQFGVSRLCYVAGREGHVPRVFSFVHIEKMPAAAVA<br>FQGLLTLLYLLTGDIIALIEFASFLTWVFYGFAMLSLIIMRRTKPNASRPYAV<br>PILVPWLILGVSIFLAVTPIVHEPTPKYLFALLFVLLGILVYHTYVYKVKVS<br>SLATKITYLIQVLCLVAPDKED                                                                                                                                                                                                                                                                                                                                                                                                                                                                    |
| AmAPC10<br>(XP_39540<br>4.2)   | MPDKVAPAEKQVLKTAKTVNSDNKAVKLLKELGLLDGVAIIVGIIVGAGI<br>FVSPKGVLENSGSGVQALIVWIFSGVLSLIGALCYAELGTMIPKSGGDYA<br>YISDAFGPLPAFLYLWVALFILVPTGNAITALTFAQYILQPVWHGCIPPYAA<br>VRLAAVITCLLTAINCYNVKWATRVQDIFTGTKIFALLIIMVAGFWWLCM<br>GHTENFRHPMNGTNTQPGYIALAIYSGLFSYSGWNYLNFVTEELKDPYK<br>NLPKAICISLPLVTIYVLANIAYFVVLQDEILASNAVAVTFSDKLLGVMS<br>WIMPVVFACSTFGALNGAIFASSRLFFVGARNHLPAAIALINVQNLTPTP<br>SLIFLCIITLALLIIEDVYVLIYYVSFVEALFTTLSVSGLLWLRYSKPNRVRP<br>IKVSILLPIIFFIICAFVIFPCYVSPWEVGVGVIIIISGIPMYLIFIYWEKKPK<br>WLIQSSHNFNMICAKLFMCVQEERSD                                                                                                                         |
| ApAPC1<br>(ACYPI088<br>688-PA) | MRNSLSNHTLYQTLCRKKTFTEDVEPGKEKLRVLNIFDLTALGIGATLG<br>CGVYVLAGTVAKSIAGPAVVL SFIVAAIVSSFSGVCYAEFAGRVPKAGSAY<br>IYSYVTVGEFIAFFIGWTLYIEHTIGTASVAKAMTNYLDALLGDPQKRYFK<br>KHFPMHVDFLGEYPDFASFFFVMFIALIVAWGVKKSSTLNKAFTLLNLLT<br>LGTVVVSGFFLG                                                                                                                                                                                                                                                                                                                                                                                                                           |
| ApAPC2<br>(ACYPI083<br>161-PA) | MYTCFIFSFEELTTAIPHAGGPFAYSRRRAFGETGGLIAGLATLIEFVFAPPAI<br>AMAIGAYLNVQYPDLNPKTAAVGAYLVFMTLNILGVKLAAMFELVVTVL<br>AVLELLVFMGVVSPGFSIANFAANGWAGSDHFGMPALSGIFAAIPFAIWWF<br>LAIEGAAMAAEEAKDPKRTIPKAYITGILTLVLAIGVMLLAGGAGDWR<br>KLSNDINDPLPQAMKMIVGEHSNWMHMLVWIGLFGVASFHGILGYSRQ<br>FFALARAGYLPQGLAKLSRFQTPHRAIIAGGVIGIAAIYSDGLINLQGMTL<br>TAAMITMAVFGAIVMYLMSMLSFLKLRRTAPDMERSFRAPGYPIIPGIALV<br>LSLVCLIAMLWFNPVIGGLFVGIMLVGYIYFLATKTQRQNAPQDAMLMG<br>E                                                                                                                                                                                                               |
| ApAPC3<br>(ACYPI003<br>923-PA) | MAVGKKNRKKTMAGVVRESSMLDRVLT TTDLTALGVGSTIGVGVYVL<br>PGALSKYVAGPAVVV SFFIAAVASVFAGLCYAELSSRVPRAGSAYSAYIA<br>VGELAAFIVGWNLLLEYTIGGASIARGMSLYIDALTNKTMETAFRGLYEIE<br>LPYLSEYFDFFAMFIVLLFSVALACGLKDSVRLNNLFTLLNCAIMVIVIVG<br>GSFHIDFKNWSLPKAEVPNWAGEGGFWPYGLQGALQGAATCFYGYVGF<br>DCIAASGEEVKNPQKSLPLAIVLSL FIVFLAYSGVSAVLTLMIPYYAQDAN<br>MPLSHAFDVIGWTSWKWIIGVGAVFGMCACMFGSMYPLPRILYAMSNDG<br>LIFKSLGKVHPRFKTPFFGTIFAGIITGFFAALLNLQQLVDMMTIGTLLVYV<br>MVAVCVLYTRYQEQSDMDYDILADEYIESTALVTIKVQHTKKQILKQLFN<br>FHKFVRANSLSSYVASLQTTCTIVCLPLGLYLSHWYELNSTHWIIVQVLV<br>GVMILQLVSIAMQPTSKTPVAFKVPLVPLTPALSIFINIYLMFFFDIYTWTK<br>FIIWMIIGFAIYFGYGITHSKENNPEINIVNSSQSKTSLNID |
| ApAPC4<br>(ACYPI006<br>356-PA) | MLRNLQTSHGFNNDTND DDDGGDGDGETAGNGKNMLARKLSTKGDT<br>LYLERRVGLFSGVALIVGTMIGSGIFVSPTG LLIRTGSIGLSFVIWAACGAM<br>SLLGALAYAELGTMNPSSGA EYAYLMDAFGPMPAFLFSWISTLILKPSQV<br>AIICLSFAKYAVEAFVDECGSSDFVVKIVAVLSILIITYINCYSVNLATGVQN                                                                                                                                                                                                                                                                                                                                                                                                                                         |

|                                |                                                                                                                                                                                                                                                                                                                                                                                                                                                                                                                                                                                                                                                                       |
|--------------------------------|-----------------------------------------------------------------------------------------------------------------------------------------------------------------------------------------------------------------------------------------------------------------------------------------------------------------------------------------------------------------------------------------------------------------------------------------------------------------------------------------------------------------------------------------------------------------------------------------------------------------------------------------------------------------------|
|                                | AFTAAKLVAVFVVVAGGVYKIIQGRTEHFRNYFENTTTSMGDVATAFYSG<br>LWAYDGNLNLNYVTEEIKNPSKNIPKAIYISIPLVTCYLLVNVAYLTIMS<br>PDEIVRNEAVAVTFGIRALGSIWVPLSITISTFGSANGTLFAAGRLCFAAS<br>REGHLMHVLSYIHIKLTMPMSIIFHSIITIVMVASGTINSLIDFFSFTAWIFY<br>GSAMLALLVMRYTRPDVPRPYKVPIIPLIIFVISLYLVVAPIIDKPQVEYLY<br>SVMFMIAGMIFYVPFVRLGYKFRIIDRWTVIIQLLLQVAPTKLVLP                                                                                                                                                                                                                                                                                                                                    |
| ApAPC5<br>(ACYPI279<br>09-PA)  | MWPYYLQDSEAPFPYIYQQLEWPIVEWIVTIGAVFALCTNMIGTLFPLPRI<br>LYSMASDGLLFHIFSKIDPKTKTPFWGTFICGAFATLSSIFNLQQLMDMM<br>SIGTLMVYTLVCTCVLILRFRDDDESEQCNVRDNADRCAPLMGQLSSIFN<br>GSNLQTTKNTGRISVIIIYRICHARAGDGSTCSPDVTVPKKNAAHGR<br>GIEPASVCVATDALVRSATPSPLFIFYVTVLIHYD                                                                                                                                                                                                                                                                                                                                                                                                             |
| ApAPC6<br>(ACYPI005<br>118-PA) | MAEFRNYKNDQSLIKTMLRRKESDLSTEPTKNQLSRVLGLVDLISLGVG<br>STLGLGAYVLAGEVAVKFTGPAVVLVSAFAAVASALSGLCYAEFASRVPKA<br>GSAYAFSYVGIGEIVAFLLIGWDLILEYSIGCASARALS GHIDKPF GHPMRE<br>YLKETFPMHVDFLAPYPDFFSFTSIIMLTFLIAWGMRESSFLNKIFTVVNLL<br>TVITVVLTGLIKVDTYNWNIPKEDIPLDAKGGEGGFLPFGWSGVFVGAAT<br>CFYGFVGFDAIATTGEEAKRPTKDIPLAIVISLSIITLSYCSVAIILT LIW PYY<br>KQDPEAPPHIYQELGWQALEWIVTIGAVFALCTNMIGTLFPLPRILYSMA<br>SDGLLFHIFSKVDSKTKTPFWGTLCGTFAILSSLFDLQQLMNMMSIGTL<br>MAYSLVCICVLVLRVTNDDEECKVRDNGRFRVSLMRLSSSFNLNSQI<br>TTKNTGRTSVKIILVYLVAICFCSSVSIAQTEGKFNMITAACS SVGVLLL<br>VLCYLSRQPQSTNRPTFHVPCVPFVPCLSVVLNIYLMTQLDTSTWIRFT<br>VWVFIGLLIYLFYGLRNSVERLNQRRILDETYMKQIRYEIQVY |
| ApAPC7<br>(ACYPI000<br>537-PA) | MDGPWYKSADSFTWALTRKKTDELSREKLN RVLT LFDLTALGTGATLGC<br>GVYVLAGAVAKSIAGPGVLSFVIAAVVSAFSGLCYAELAGRVPKAGSSY<br>IYSYVAVGEFTAFVIGWNLIIIEYLIGTACAAMSNYCDYLLGNPQKRYM<br>TEYFPIHISFLSNYPDFASFTMIVIA                                                                                                                                                                                                                                                                                                                                                                                                                                                                           |
| ApAPC8<br>(ACYPI061<br>470-PA) | MDGLKKRLVQSSVCFSSIGDLTIGNRYPITKLCNQDTQYGRVLC TLIDN<br>NDGDKLINVYLPKSIKLNDEILEFNRSVKMNTTSENKIDSMSTKKR<br>GSVGLKKQLGLLEGVAIILGIIFGSGIFISPSGVMNEAGSVGVS LAVWMC<br>GILSMIGALCYAELGTSIPRSGGDYTYLFEAYGPLPAFLYLWDAMLVFLS<br>SICINIGFITFINCWNVKATTKIQNVFMFTKISALVLIIVCGGVYLHSNGFSK<br>FTNPWQGSVTDPGKLAVSVYSGIFSYSGWNFLNFMTEELKNPYVNL PRA<br>IYISMPLVTIIVLANVAYLAVLTPHDMVTTNAIAVTFSHLAMGSFEWVMP<br>LMVALSAFGGLCVNIMTSSRICCVGARYGHFPTFLSYINVERYTPTPALVF<br>LNILSLFMLFTSDVNILITYSSIVEAFTMLS VSSVLWNRWKRPNTNRPIK<br>VSLWIPITYVIVSLFLIVLPCYVRPFQVGMGVGITLLGIPVYYVCVWVWTK<br>PAWFQNSLKHVTFTIQKFFVVAKEEKADGVWE                                                                       |
| ApAPC9<br>(ACYPI005<br>006-PA) | AASVARAWSGFFDSMFDNVIRNTTISVLGELHETLFGKYPDVFAFFVCLL<br>HACILGVGVKTSSYMNSFLTLVNLGVMVAVIVVAGYYYGNSDNWSSDGG<br>FMPYGTGIIAGAATCFYAYVGFDSIATSGEEAKDPAYSIPVATIAMSVC<br>TGYVLVSGALTFLVPYWSIVPDAAFPAAFAGLDLNLWIKYLVSVGALCGM<br>TTTLFGSLYSLPRCIYAMADDGLVFKFLAKVNKKTQIPIINLAISFLCALI<br>ALFFDLEKLVFMSIGTLLAYTIVSASVIILRYRPTNRGLVRDSSSLELPTS                                                                                                                                                                                                                                                                                                                                      |

|                                 |                                                                                                                                                                                                                                                                                                                                                                                                                                                                                                                                                                                                                                                                                                                                                                                                                                                                                              |
|---------------------------------|----------------------------------------------------------------------------------------------------------------------------------------------------------------------------------------------------------------------------------------------------------------------------------------------------------------------------------------------------------------------------------------------------------------------------------------------------------------------------------------------------------------------------------------------------------------------------------------------------------------------------------------------------------------------------------------------------------------------------------------------------------------------------------------------------------------------------------------------------------------------------------------------|
|                                 | QADSFEMDMGGRLKPSYKFLEPFGEFEPGYIVCVSIGWFTSSTVVLVCVY<br>IQYWFNIQHVSUIDGIVLTAALGTDLILCQFLIEAHEQNSTELPFMVPVPLI<br>PSLSIVCNIVLMTNLNLLTWIRFFIWMVIGLLIYFLYGMHHSKENDVTSYS<br>VLLSSEAGKTPWGAINKSRKRVKTEDDRKPIIDNEELADNGYYH                                                                                                                                                                                                                                                                                                                                                                                                                                                                                                                                                                                                                                                                            |
| ApAPC10<br>(ACYPI009<br>985-PA) | MSVPKLPDFRRDGLALITRMVVRTKDLDDLQGESSPTGRFDPHHPKTKL<br>KCLNTIDLTSGLVGSCLGTGMVYVVTGLVARRFAGPAVILSFIIAAVASLFSG<br>ACYAEFGVRVPNTSGSAYMYSYVTVGEFIAFLIGWNMVLEYLIGTSACA<br>CALSASLDSLNGAISASVQNYVGFGLKPDILAAAGITLLMMVLLAAGVK<br>KSLVFNHLMNAINLAAWVFLMSAGLFYVNLNWNWTKNDGFLPNGWGGV<br>FKGAATCFYAFIGFDIIATTGEEAHNPKKSIPLAIMASLVILVAYVSSSIILTL<br>IVPYTKIDENAALLDMFVQVGAPRCQMVVAAGAMAGLLVSMFGSMFPM<br>PRIIYSMAQDGLLFSLSQIFPLTGPVVATVLSGVASAVAALVINLDTLIE<br>MMSIGTLFAYTLVSTCVLILRYQPQTSTVIHFFPETMRSPMNAKQIVTNG<br>RVNFVVQDDQKYAYTNQGYGNQTSFYQTQLPLPQQIIPSHQSQRIMVRK<br>VTRSSPDSDDTYFGDDSEGRDDQYLVSDRCESKFYGSVHGGSTAGSTA<br>AAGGFSAAANITRSIKAATYLCPAIFPWVDMGPATEESGMVVLKLVGVF<br>YVLIIVFDVLLVFSSESSTFVYILLYALLIAVIAVLGAISRKPQNKQILVFKT<br>PWVPFVPSFSIAVNLYLIFQLSSMTLLRIVVWVSIGLFFVYFYGIKHSTLEP<br>RVDEDERIELKMKSQTMTPKQNNQPPAPAKTSANTTSTANTTTTTTATA<br>STRVASSTTTAAVVDENKTEPKRPTNLEPLPASNDSNLFVSPSAFPKWED |
| ApAPC11<br>(ACYPI009<br>467-PA) | MNTATPENAKITDSIPEETGDRVRLKKQLGLLEGVAILGIIFGSGIFISPTG<br>VMIHAGSVGVSLTVWIMCGMLSMIGALCYAELGTSIPRSGGDYTYLFEG<br>FGPLPAFLYLWDAMLVFPVPTNAIMGLTFANYVIKPFPECDNPEQAVRLL<br>AAAVICFITFINCWNVKATTKVQNVFMFTKISALVLIIVCGGVYMYNSGFS<br>KFMNPWQGSVTDPGRLAVSVYSYSGIYSYSGWNYLNFMTTEELKNPYVNL<br>RAIYISMPLVTIIVLANVAYLAVLTPHDMETTKAIAVTFGHFAMGSFEWI<br>MPLMVALSAFGGLCVHIMTSSRMCVFGARYGHFPTFLSYINVERYTPTPS<br>LVFLNILSLLMLFTSDVEMLITYSSIVEAFFTMLS VSSVLWNRWKRPNINR<br>PIKVSLWIPITYVILSLFLIVLPCYVKPFVGMGVGITVVGIPVYYLVCVW<br>KTKPVWFQNSLKHVTFTIQKLFVSAKEEKSEDIWE                                                                                                                                                                                                                                                                                                                                                |
| ApAPC12<br>(ACYPI005<br>156-PA) | MTGSWTKSVYQKLSRKKTYVEEIGVEKDKFKRVLNVVDLTAALGTGSL<br>GCGVYVLAGTVAKSVAGPAVVLFSILAATVSSFSGVCYAEFASRVPKAGS<br>AYIYSYVAVGEFIAFVIGWNLLLEHTIGTAAVAKAMSNYLDLSDLPQKR<br>FMKKHFPIHMDFLGEYPDVASFLFIMSIALVVAWGVRKSSTLNNLFTTLN<br>LVTVCTVIVSGFYFANLSNWFIDKNDIPPVNGGNGGFLPFGWTGMIAG<br>AARCFYGFIFGDSISSTGEETKNPKKTIPLAIVLTLFNVTVAYSSVASVTL<br>MWPYYDQDPNAPLPVIYENLGMVPLKYLVTGGAVFALFTTLIGCLFPIPRI<br>LYAMSSDGLLFSFLATINEKTKTPFIASIIICGVCAGLLSTIFNLEQLVDMASI<br>GTLQSYMIVSVCVILRYRNTNLYSRDSDSPEEYTIAMWLNVSANVNTN<br>RETQYVSRILITIFSFTACIFCICVVNWDSHQGTAQLILGFIICLSIILLVVML<br>MLNRPQAIETLPFKVPFVFPVCLSIVLNLYLMMVLNVKTVIRFSVWL<br>VGLLIYGFYGLKHSIEGVKEQTTKVEEGKNEQKPSN                                                                                                                                                                                                                                       |
| ApAPC13<br>(ACYPI003)           | MRNSLSNHTLYQTLRCKKTFTEDVEPGKEKLRVLNIFDLTALGIGATLG<br>CGVYVLAGTVAKSIAGPAVVLFSIVAAIVSSFSGVCYAEFAGRVPKAGSAY                                                                                                                                                                                                                                                                                                                                                                                                                                                                                                                                                                                                                                                                                                                                                                                     |

|                                 |                                                                                                                                                                                                                                                                                                                                                                                                                                                                                                                                                                                                                                                                                                                |
|---------------------------------|----------------------------------------------------------------------------------------------------------------------------------------------------------------------------------------------------------------------------------------------------------------------------------------------------------------------------------------------------------------------------------------------------------------------------------------------------------------------------------------------------------------------------------------------------------------------------------------------------------------------------------------------------------------------------------------------------------------|
| 240-PA)                         | IYSYVTVGEFIAFFIGWTLYIEHTIGTASVAKAMTNYLDALLGDPQKRYFK<br>KHFPMHVDFLGEYPDFASFFFVFMFIALIVAWGVKKSSTLNKAFTLLNLLT<br>LGTVVVSGFFLGKLSNWFIPKSEIPPGVDGGDGGFSPFGWNGIAGAARC<br>FYGFIGFDSIATTGEETKDPKRTIPLAIIILSLFFVTLAYSSVASVLTLMWPYY<br>DQDPDAPLPVIYENMGMPPIIKYMVTCGAVFALMTTLLGCLFPIPRILYAMS<br>SDGLLFKCLSTINEKTKTPVLATMICGIGTGLLSSMFNLEQLVEMTSIGTL<br>MSYLMVCVCILILRYKNNNSVSQDLNSEVHIIYKWWNASNTGLTNTDS<br>QYVSRVLILTYTFAAFVFCICMTNVHYFEGSLQLSLTIIIGISVATLLISLLML<br>CRLPQAVENLSFRVPFVPLVPCLSILLNLYLMMELNIKTWMRFGVGIVVG<br>LLIYVFGVHNSLEGFKQQAIDKEHKQDPKISN                                                                                                                                                               |
| ApAPC14<br>(ACYPI003<br>523-PA) | MIHSWSGKTLYQSLSRKKTAFATENKQEKDKLKRVLTFIDLTALGIGATLGS<br>GVYVLAGTVAKSVAGPAVLSFIVAIVSSFAGVCYAEFAGRVPKAGSAYI<br>YSYVAVGEFIAFIIGWNMFIEHTIGTASAAKAMTNYLDSLLGDPQKRYMI<br>ARFPIHMQYMGEYPDVAAFLFLMFIALVMAWGVKKSSTLNTVFTAFNLL<br>TVGTVIVSGLFFVKISNWNIPKSEIPPGVDGGNGGFAPFGWGGIAGAARC<br>FYGFIGFESISTTGEETKNPKKTIPLAIVLTLVFTSAYSIVASVLTMMWPY<br>YDQDANAPFPVIYENLGLPVIKYTVTCGAVFALFTSLLGCLFPTPRILYAM<br>SCDGLLFEFLSIVNERTKTPVIATMICGVGAGILSSIFNLEQLVDMTSIGTLI<br>TYLIVCICLLVLRDRDTNTAIQDIDSNPDDYNIFKWYSLFNTKVTNLGTQY<br>ISRVLILITYTFSACVFCISMVNINCYDGAFYFPLIVVIAISITVSLLSMLMLH<br>RLPQAIENLAFRVPLVPFIPCMSIILNLYLMMELSIKTWIRFGVGLVGLVFI<br>YAFYGIHHSLEGSKQRAVKNEENKNTPRISC                                                  |
| ApAPC15<br>(ACYPI008<br>904-PA) | MMKLRETLYQVLFRRKNEDDIDDPDKEKLARVLNLVDLTALGVGSTLGV<br>GVYVLAGNVARIEAGPAVLSFVLAFAFASALAGLCYAEFAARVPRAGSA<br>YVYSYVGVGEFVAFVIGWNLILEYVIGTASVAKAFSNYIDALLDYPVKTT<br>MTYLFPMNVSFLADYDPVLSFSLVILLSIILAWGVRESTMINNVFTVVNLL<br>TVFTVVVSGLFKVNLYNWSIPKQDIPKSAKGGEGGFMPFGWAGVTAGA<br>AKCFYGFIFGDSVATTGEEAKKPKRDIPLAIIILSLSITFAYCCISSVLTLMW<br>PYYDQDIDAPFPYVYDKLGWTTLMKIVSSGAIFAMFASLLASMFSPRIL<br>MTMAEDGLMFSMFSIIHPKFKTPLLATLLSGLLAGIITALLNLEQLMNM<br>SIGTLLAYTIVCICVLILRYKNDPDSDEFVKNQVIDEPETSSGFFKVVDKYF<br>NLSNVDNANKETERVATTITVLYICTSVLFSFVTVQHECVATNHPWCDGN<br>SSAFQPGCVLNTNATTLFKQGCIENTIATYTSAILAIGLLLLLLLLLTRQPQ<br>SNKKLSFKVPLVPLIPCISILMNVYLMMKLDIITWIRFSIWLTIGLFIYVLYG<br>MNNSAEGIKRKGEPNNSRSSSAEPIHQISSINL |
| ApAPC16<br>(ACYPI000<br>584-PA) | MMDDPWYKSTDSTLWALTRKKTDSDDPSKEKLNRVLTFFDLTALCTGST<br>LGCGVYVLAGAVAKSIAGPAVLSFAIAAVVSAFSGLCYAEFAGRVPKAG<br>SAYIYSYVAVGEFTAFVIGWNLIEHLIGTAAMAKAMSNYCDSSLGDPQR<br>RYMTEYFPIHISFLADYPDLAFAFVIVVISLLVAWGVRESSLTNNIFTALNL<br>ITICIVIVTGFYKANYSNWSIPKSEIPPEAKGGEGGFMPFGWVGAAGAAK<br>CFYGFVGFDSIATTGEETKNPKRDIPLAIVAALFLSTIAYCGVATVLTLMW<br>PYYLQDPHAPLRALYENLNMPTLKIIVSVGAIFALCTSLLGAIFPLPRILYA<br>MASDGLIFKFLSNINATTKTPLISTIICGVFAGTLSALFNLEQLIDMASIGTL<br>QAYTIVCICVLILRYTDNPSIHDNTVKSIGITVFTWLNLSNAKVPNSDTQ                                                                                                                                                                                                        |



|                                 |                                                                                                                                                                                                                                                                                                                                                                                                                                                                                                                                                                                                                                                                                                                                                                                                                                                                                                                                                                        |
|---------------------------------|------------------------------------------------------------------------------------------------------------------------------------------------------------------------------------------------------------------------------------------------------------------------------------------------------------------------------------------------------------------------------------------------------------------------------------------------------------------------------------------------------------------------------------------------------------------------------------------------------------------------------------------------------------------------------------------------------------------------------------------------------------------------------------------------------------------------------------------------------------------------------------------------------------------------------------------------------------------------|
|                                 | YVSRALIFFSVCTFVFAISLANMESHGNTNRNLIINIINVTSLLVLLVTLFML<br>GRLPTAVEDLSFKVPLVPIIPCLSIVLNVYLMMELEYKTWIRFIVGLISGLLI<br>YLFYGIGHSLEGNKQKIQLNTIQMNPCLSS                                                                                                                                                                                                                                                                                                                                                                                                                                                                                                                                                                                                                                                                                                                                                                                                                       |
| ApAPC17<br>(ACYPI002<br>633-PA) | MDGSWWNSREKLIQVMSRRKSDDDILIDQPEKKKLARVLNLADLTALGV<br>GSTLGVG VYVLAGSVGKTDAGPAVVLSFILAAIASAFAGLCYAEFAARVP<br>KAGSAYVYSYVGVGEFVAFVIGWNLILEYVIGTASVAKGFSNYMDALLD<br>YPMKRTMTNLFPINVSFLSEYPDFLSFSIVLLLSILLSWGVRESTMINNVFT<br>VVNLLTVATVVITGLFKVNWYNWNIPKQDIPKNVRGGEGGFMPFGWAG<br>VTTGAAKCFYGFIFD VVATTGEEAKKPKRDIPLAIIILSLIITFAYCCISAV<br>LTLMW PYYKQDANAPFPYVYDQLGWTIKWIVSSAAIFALFTSLIGSLFP<br>LPRILYAMSCDGLLFRMFSDIHPKYQTPLLATLLSGLLAGIMSAIFNLEQLI<br>DMMSIGTLLAYSIVCICV LVLRYRNDSDVEFVIKGNDELETS GFVETVIKT<br>VVKYFNLSNIKYANEETESVAMIITMWFICTSALFCFITVKQDGAQNSSD<br>VATYSSAILVIGLLLLLLLLLARQPQSTKELSFKVPLVPFIPCMSILLNIYLM<br>KLDIHTWIRFGIWLLIGLFIYVFYGMKHSVEGRKQLKEPKKRPSSAAAVH<br>PISIKL                                                                                                                                                                                                                                                                               |
| ApAPC18<br>(ACYPI005<br>720-PA) | MGVCRKEDGSAVEADVAPAEDDGIELKPKMSLLNGVTVIVGSIIGSGIFIS<br>PTGVLENTGSVNASLVVWVLSGVFSMVGAYCYAELGCMISKSGADYAYI<br>METFGPFIAFMRLWVECMIVRPCSQAIVALTFSLYVLKPMYTD CDPPEEST<br>RLLAACCVLLTFINCWDVKWATR VQDIFTYAKLLALMVIITGVYQLYA<br>GHTEHFTFVNTKTEVTSIALSFYSGLFAYNGWNYLNFVIEELKDIRNLPR<br>AIAISCILVTVVYVFTNIAFYTTLS PQEVL TSEAVAVTFADRLYGPMAWTIP<br>VFVALSTFGAVNGILLTSSRLFYAGACEGQMPQILTMIQINRLTPPAVICIC<br>LLSLIYLQISNIYALINYVGFATWLSIGVSVLCIPVLRFTQPDLERPIKVNMF<br>FPVYIGATL FVTIPIIASPVETGYGCLMILTSIPVYGVFIFWKNKPMIFHKI<br>VGCLTRYLQILLMVTTSKTPAKV                                                                                                                                                                                                                                                                                                                                                                                                                             |
| ApAPC19<br>(ACYPI008<br>323-PA) | MHVDSMKCSDYRLMIGITKPKKNFEAAEHLAILHQFNGCTENNRLKIP<br>LLGPVTQFKAIGNCIGVENRGPTT PFITLKNNSVLNTFWLECD SFSFDCTR<br>NYIYYNVNQSILQYDLLSSMLFEVEVIQKIAVNAISNLFPLTHLNDRYLLV<br>KSILPNTYEIFDVKEHVSISIRLTPGYKLVHVG YILFNTFKLHKDSSMKM<br>FGDSVTQLCETVERETLSQILFRKNEDKLDQPDNKKLARVLNLFDLTSL<br>GVGSTLGVG VYVLAGIVANTLAGPATVLSFVLA AFAS AISGLCYAEFAAR<br>VTRAGSAYVYSYVGVGEFVAYMIGLNLILEYVIGTASVAKALS NYIDALL<br>GYPIRTCMMYLLPMNVSFLASYPDILSFLVLLLSFLLSWGVRESAMINN<br>LFTIVNLLTVGTVVVSGLFKINFHNWNIPKQDIPMSANGGEGGFMPFGWT<br>GVTMGAACFYGFIFD SIATTGEEAKNPKRDIPLAIIILSLIITFAYCCTSS<br>VLTLMWPYYDQDIDAPFPYVYNQLGWTSMKIIVSSGAIFAMFASLLASM<br>FSMPRILMTMAEDGLMFSMFSDTHPTLKTPTATLV SGLFAGIITMFLNL<br>DQLMNMMSIGTLLAYTIVSVCVLLLR YRNDPNDDKFVINQGDDEPETGG<br>FVKMVERYLNLSNVDNCNEDTERVATTLTVLYFCTSALFSFVTAQQECVK<br>TTQQWCDEDDR NATVFQPGCVVNTN NATPNFEQECIRNSIAMYTSVIL<br>AIGLVLLTYLLSRQPQSMKLSFKVPLVPLTPCISILLNFYLMMLDQNTW<br>IRFSIWMII GIFYVFYGMNHSVEGLKRKGEPKISQSSSVELKTSPPSSAEPE<br>YEYYTTHL |

|                                          |                                                                                                                                                                                                                                                                                                                                                                                                                                                                                                                                                                                                                                    |
|------------------------------------------|------------------------------------------------------------------------------------------------------------------------------------------------------------------------------------------------------------------------------------------------------------------------------------------------------------------------------------------------------------------------------------------------------------------------------------------------------------------------------------------------------------------------------------------------------------------------------------------------------------------------------------|
| <p>ApAPC20<br/>(ACYPI001<br/>378-PA)</p> | <p>MTSIPKNVKLRRELGLFSVAVCLIIISVMLGSGIFVSPANALKNTGSMCLV<br/>IWMSCGLLSLLGAMSYAELGTVVNKSGGEFSFYQSAFADMHKFWGPLPS<br/>FIYSWVSIMYVRPAEVAIIILTFAEYFIRPFSILSSMTPETEHTVKKTVSILAL<br/>GIITFINYTSVKCFIKIQNVFTVCKVTACIVVIGGGVYQLYQGNTKNLMTG<br/>FEGTTLSDITLPIAFYSGLWAYDGTATTVVSEEIKNPRRNILLSILLAVPF<br/>VTMIYVLMNVSYLTVLSVAEMTSVQAVAVEFGTRALGSFSFIPLGVATAT<br/>FGCALSVQFGITRLCFAASREGQMLEVFSYVSVKCLTPAPAVVLQGLLTLI<br/>CLLCGDIVVLIEFASFLVWMFYGISMAALLVMRYTKRDVKRPFKVPPIIF<br/>VLIVSTVLFITPILNDPKPQFLIGLVFILSAFLIYIPFVYQKKRLSIVDNFTKFI<br/>QVLMVVVPPEKDEEDAENCNVKDNEGETEAPMIAAVV</p>                                                            |
| <p>ApAPC21<br/>(ACYPI084<br/>217-PA)</p> | <p>MVGAGIYVLIGTVAKEMAGPAIILSFMLAGAAASMLAALCYAEFGTRIPKA<br/>GSAYVYTYVSVGEFWAFVIGWNIILEHMIGNNFRRARLITNIATTQRSFTG<br/>PELGGACLARVVV</p>                                                                                                                                                                                                                                                                                                                                                                                                                                                                                               |
| <p>BmAPC1<br/>(XP_00492<br/>4096.1)</p>  | <p>MSAQKAEISDRPETLSRQHSECGSAVKKLRELGLFSAVNLILGVMIGSGIF<br/>VSPASALEYSGSVALCLIIWTVSGIISLLGALSFAELGTVVGKSGAEYAYFQ<br/>EAFGKIHKFWGPLPSFSCAWIYVMILRPAEVAIVVMTFAEYAIQPITIDVHP<br/>DYKDNAIKLASLAALFIMTYINITSVKLFVQVQNVFVGVCKVLACLVVIGG<br/>GIYEIAKGNNTSHLNKGFEGSTTNPGSIALSLYYGLWAYDGWNSVTVVTEE<br/>IINPGVNVPLSISIAVPLITALYVFMNVAYMTVLSYAEMTSGTAVAVAFGAR<br/>VLGPFSEFIMPLGVAVATFGCAMSQVQFVTRVCYTAARGGHMLELFSYVNI<br/>KRLTPAPAVAFQAFLLTAIFISVGNIKTLIQFASWFLWFFYGLAMVALLVLRK<br/>TQAAKPRPYRVPTPIPVFVLIVAIFLSVLPIVEDPSVKYLMAIGFILLGVVV<br/>YTVFVYYKRTPSALIRKLTFTVQILFESVPPSKDQDD</p>                                                         |
| <p>BmAPC2<br/>(XP_00492<br/>4956.1)</p>  | <p>MVEERIKMRKQLGLLEGVAIILGIIFGSGIFISPKEVLEKTGSVWSALIVWA<br/>ACGVLATLGAMSYAELGTTLAQSGGDYHYINEAYGPLPAFLYLWDANFV<br/>FVPSTNAIMALTFTNNVVEPLFPNCPVNHISRKLIAASTICILTFINAYDIKF<br/>TTRIQNVFMFTKIMALVIIIIGGIVWILRGGTEHFENGWEGTKTSAAEWSV<br/>AFYSGIFSYSYSGWSYLNFMTEELRDPYVNLPRAIYISLPLVTVIYLLANMSY<br/>LAVLGPVGVSTEAIAVDFADHALGWFKWAMPTLVAVAILGGLSVHIMTS<br/>SRMCFAGARNGHMPELLAHINVKCMSPMPSLVFLMLMSLLMLIPNNLTS<br/>LITYCTVVESFFTTLSCSAVLWLRYPKPELHRPIQVQLWIPVLFVVISTMLL<br/>VVPVISEPFAVLAGAGMTLAGVPVYLCLVRTTPSPIKRLSVRFTYFCQKIF<br/>LCVVEDKEE</p>                                                                                           |
| <p>BmAPC3<br/>(XP_00492<br/>5382.1)</p>  | <p>MSYPDENIGRNYESIHFGRDSSVRRSFENGGIKAGATHAARLAYQVLS<br/>RRKVAEEGAARLARVLTAFDLTALGVGSTLGVGVYVLAGDVAKNYAGPA<br/>VVISFLLAAVASVFAGLCYAEFGARVPKAGSAYVYSYVCVGEFIAFIIGWN<br/>LILEYIIGAASVVKALSEYLDSSLNKAISSHLEAALPIDSPHLADYPDVFAF<br/>SVIMAFSVALSFGVKESTKFNNVCTAINLCVVLFVIVSGSLKADTSNWRIP<br/>ESEVPKDEGRSYGTGGFAPYGLAGIIRGAAVCFYGFIFGDCVATAGEEARR<br/>PQRSIPAAVAGSLLVFLAYCGVSCVLTLLVLPYYLQDEKAPFPFVYDRLGC<br/>PWAKYAVSVGAICALCSSLMGAVFPLPRIIYAMASDGLLFRWLGRVNEKY<br/>QTPLVGTITAGFLTGTLAMIFKLEQLIHMMSIGTLLAYSMVASCVLLLRYE<br/>ASPQRAGAERAAPSRRTATTVTVLVTLYGIWCFLMMWCVNSYGDRVLE<br/>GHGGYTALLLLATALVVATLCCISRQPVSEKKLAFSVPLVPWLPGLSILIN</p> |

|                                |                                                                                                                                                                                                                                                                                                                                                                                                                                                                                                                                                                                                                                                           |
|--------------------------------|-----------------------------------------------------------------------------------------------------------------------------------------------------------------------------------------------------------------------------------------------------------------------------------------------------------------------------------------------------------------------------------------------------------------------------------------------------------------------------------------------------------------------------------------------------------------------------------------------------------------------------------------------------------|
|                                | YLMLNLDYMTWVRFVWVAGLVYFSGMWNSTERRRTMDSIQLADQ<br>IIDGHTALLNHSGLTHALG                                                                                                                                                                                                                                                                                                                                                                                                                                                                                                                                                                                       |
| BmAPC4<br>(XP_00492<br>5398.1) | MSKIFAALRRCKLDDNDNTTQLSRCLGLFDLTS LGVGSTLGLGVYVLA<br>GAVAKTVAGPAVTL SFLVA AIASAFAGLCYAEFASRVPKAGSAYIYSYVSV<br>GEFIAFTIGWNLILEYAIGTASVAKGMAVYIDTLFNNTMARTMTAAAPINV<br>SFLADYPDFFAFGLVILITLLLIGVSESTKLNNVFTALNMTTVIIVVAGA<br>IKSNPANWNIKLADIPPEYVSQAGEGGFMPWGVAGVMAGAAKCFGFV<br>GFDCVATTGEEAKNPKRDIPLSIVLSLIIIFLSYFSIATVLTMMLPYYLQDAE<br>APFPYVFEQANLPVIKWIWTVGAIFALCT SLLGAMFPLPRVLYAMASDGV<br>LFRPLAAIEPRTKTPLLATAISGFLSAIMAAMFNLNQLIDMMSIGTLLAYTI<br>VATSVLILRYEEEDVSVSTEK VSTSAGGLAAALRQGCNLLGLKYPTQLSS<br>TIAKTTIALFFVVALAACVFRVGVDE VGGAVVGAALGAALVALLVLY<br>RQPTNNVTHLSFKVPLVPLVPYLSVCMNVYLMVQLDYQTWVRFIWLVI<br>GYLIYFFYGIRNSSLNAWPPAGKLGDKDKTQVVTKF |
| BmAPC5<br>(XP_00492<br>5399.1) | MGCGKIFATLRRCKKIDYDDDTTQLSRCLGLFDLTS LGVGSTLGLGVYVLA<br>AGAVAKTVAGPAVAISFLVA AISSVFAGLCYAEFASRVPKAGSGYNYSYVS<br>VGEFIAFTIGWNLILEYAIGTASVAKGMAVYIDTLFNNTMAKTVTAATPIN<br>VSFLADYPDFFAFGLVFLVTILLIGVNESAKMNNVFTALNVLTVIVVVVA<br>GAVKSNPANWNIKLADIPPEYVSQAGEGGFMPWGVAGVMAGAAKCFGF<br>FVGFDCVATTGEEAKNPKRDIPLSIVLSLIIIFLSYFSIATVLTMMLPYYMQ<br>DAEAPFPYVFEQVNLVPVIKWIWTVGAIFALCT SLLGTMFPLPRVLYAMAC<br>DGV LFRPLAAIHPKTKTPLLATAISGFLSAIMAAMFNLKQLIDMVSIGTLL<br>AYTIVATSVLILRYEEEDVSVGTEKISARGRGVLAVLGQGCNLLGLKNPT<br>QLSSTIAKITIAVLFVVALATCVLSVDGGAVAGAILGAILVLLVLYRQP<br>TNDVSHLSFKVPLVPLVPYLSVCMNVYLMVQLDYQTWVRFIWLIIGYLI<br>YFLYGIRNSSLNSSQPAGKVDDKDKSQVVTKF |
| BmAPC6<br>(XP_00492<br>8535.1) | MHHNEQPTGNACNGSTREGGLVWRGCSASCD AEDGTTGAFDDGNSNP<br>GDKLEGS DAAPDDPVHLKRRVGLFSGVALIVGTMIGSGIFVSPSGLLART<br>GSVGISFIIWMACGLLSLLGALAYAELGTMNTSSGA EYAYFMDAFGGPPA<br>FLFSWVSTLVLKPSQMAIICLSFAKYAVEPFVAECEPPDSLVKLVAVISIVMI<br>LAVNCYSVNLATNVQNIFTA AKLVAIAIIVCGGAYKLILGNTRHLQEPNEA<br>SSKATLGNIATAFYTGLWAYDGNLNYVTEEIKNPSKNLPLSIIIGIPLVT<br>LCYALVNVSYLAVMSVSEMADSEAVAVTFGNRLLGPMAWLMPLAVTIST<br>FGSANGTLFVAGRLCFAASREGHLLDILSYVHVRRTF PAPGLIFHSLIAVA<br>MVLYGTIDSLIDFFSFTAWIFYGGAMLALIVMRYTKPHAPRPYKVPIIPYI<br>VLFVSAYLVVAPILDKPQWEYMYAAAFILGGLLVYLPFVKWGYSLPFMD<br>KITVFLQMVLEVVPSTTFEY                                                                    |
| BmAPC7<br>(XP_00493<br>0971.1) | MGEESQAGDGKVVLKRKITLFNGVGHIGTIIGSGIFISPAGVYLYTGSVAA<br>SLIIWLASGLLSTLGALCYAELGTSITRSGGDYAYIYTAFGPLPAFLRLWIA<br>LLIIRPTTQAIVALTFGNYVVKPFPECDPPENAVRLLAAVCLCVLTAINCIS<br>VRWTMRIQDVFTTSKLLALVVIISGLYICIGNTQNFENAFAGEYSAGNI<br>ALAFYSGLFAFGGWNYLNFVTEELQDPYKNLPRAIWIALPLVTIIVMAN<br>LAYFAVVTKMEMMANPAVAAIFGDRLFNGNSWVIVFVALSTFGGVNGV<br>LFTSARLFATGAQEGHMPAFFSLFHVDKQTPISLIFTCCFSLMLTTSNVF                                                                                                                                                                                                                                                                   |

|                                 |                                                                                                                                                                                                                                                                                                                                                                                                                                                                                                                                                                                                                                                                                                                                                                                                                                                                           |
|---------------------------------|---------------------------------------------------------------------------------------------------------------------------------------------------------------------------------------------------------------------------------------------------------------------------------------------------------------------------------------------------------------------------------------------------------------------------------------------------------------------------------------------------------------------------------------------------------------------------------------------------------------------------------------------------------------------------------------------------------------------------------------------------------------------------------------------------------------------------------------------------------------------------|
|                                 | ALINYYSQILWLSVGASVVGMLWLRRTKPDLPRIKVNIVIPYIFLIAIACL<br>VIIPAIVQPKDTAIGIVILLSGIPVYYLVCVKWQRKPEAYHSFSGGILRFLQKT<br>CSCIYLDSTEKLSSES                                                                                                                                                                                                                                                                                                                                                                                                                                                                                                                                                                                                                                                                                                                                         |
| BmAPC8<br>(XP_00493<br>0975.1)  | MAKVADVDGLAPKAIENEVESSDGVEKGGVRLKKELSLMNGVAIIV<br>GVIVGSGIFVSPSLALKHAGSKGMALIVWVLSGFLSMIGALCYAELGTMI<br>PKSGGDYAYIGEAFGLPAFLYLWVALFILVPTGNAITALTFAENILKPLWP<br>VCNPPVVAVNLIAASITCFLTIINCYNVWVTRVQDSFTAACKVLALLVTF<br>ASLVYLFSGHTENLQYMMMEKTTTDPGEIAIAFYTGFLFSYSGWNYLNFVT<br>EELKDPYKNLPRAICISMPVVTLVYTLTNVAYFAVLSSDEILSSSAVAVTFS<br>EKILKMMSWIMPLFVALCTFGSLNGAIYTSRLLFFVGARNHPLAISLID<br>IKRLTPVPSLIFMCLVTLTLLSNDIEALMVYVTAVEALFTLCSVTGLLWM<br>RYTRPRLQRPVSLVLPAILITCTFIVICSCFKYPKHVIGVAFIALGVPIY<br>MIFIKWQNKPNWILTACNSFNLACSKLFLCLPEDCKEL                                                                                                                                                                                                                                                                                                                               |
| BmAPC9<br>(XP_00493<br>2101.1)  | MPGARHKILGHVLSGFCHKMNRCKPLHGDSMDTPLNRCLTTFDITLLGV<br>GHMVGAGIYVLTGTVAKSMAGPSTALSFLAGITSTLAALCYAEFGTRIP<br>RAGSAYAYTYVSIGEFWAFIIGWNIVLEYMIGAASVARAWSGYLDLILHG<br>AISNATVALTGELHETLLSRYPDILAFILCLAASLILAAGVKTSAYINNGLTI<br>LNLLVISLVIFLGFYADISNWSEKNGGFMPFGFSGVLAGAATCFYAFVGF<br>DSISASSEAKDPSRSIPVATVLSMAVAFGYILVAMALTMVPYNTINPD<br>AALPAALGAVHADWAKYAVAVGAVCGMTTLLGSMFSLPRCLYAMSAD<br>GLLFGFFSDISNKAQIPVANLAISGLSSAFIALFDLEKLVFMSIGTLLAYT<br>IVSAAVILRYRPTPTTEDKGFVVPQLDSPCDREDSSATGTPATDGGSSSE<br>MFETLTVGRLRPQFAWLEPLVGGRAPGAAVTCSVYFTTIATAALCAHNHF<br>LVEPAGLWVLLPDFVLIFIIISCLVIIWAHQSPTRLPFRVPWVPLPAASV<br>MLNVELMINLNALTWARFAMWMTFGLLVYFLYGIHHSKLGEGVAGLLSS<br>GGNNSDWGAVEKTSSRRIGRFRSSKGGDDRKPIICEDELSRREP                                                                                                                                                          |
| BmAPC10<br>(XP_00493<br>3202.1) | MYSVLDNLPTRDLIGHHSTIFGLRAVLINRRCLTTTDLTSLGVGSCVGTG<br>MYLVAGMVARKFAGPGVMISFIIAIAISIFSGACYAEFGVRVPNTTGSAYT<br>YSYVTVGEFIAFIIGWNMVLEYLIGTSACARALSACFDSLFGAISHHLAL<br>NIGTIFGKPPDFIAFAITLLMMLVLIAGVRKSLMFNNILNSINLIVWVFIMG<br>SGLFYADFSNWDHKGFLPYGWNGVFSGAATCFYAFIGFDIIATTGEEAN<br>NPKRSIPLAIVLSLGIILLAYVSTSMMLTLIVPYDQIDTDSALVQM FARAGA<br>PICKYIVAIGALAGLTVSMFGSMFPMPRIYAMAQDGLIFKSLASISSETSGT<br>PALATILGGFAAAMVALTIQLEVLVEMMSIGTLLAYTLVSTCVLVRLRYQPH<br>TTNLIELLPQSLRTPVEPDATATASHETCFTGHLQAHQAASQHVMMVRRVT<br>RSSPDSDDTLPGDDSEEYGRDDTFLVNSAAENKFYVGAVPGGSGAAYTR<br>CGRFMEAISRRHLHAMSYLECPGLFPWVDCGPATEFTGLFVIKAVGVMMFVM<br>IFLFDVLAAYGNPGTSTFTAIVMVLLFLGIVLILLISRKPQNRVALMYTTP<br>GLPFVPTIAIIVNIYLILNLSILTIVRFTVWVWALGLVMMYFKYGIKNSTLETN<br>PKMPRAVTPPPNPLDRITIPPASPGQSKPVGDRNIFEGDNGSGFYGHFDQ<br>YPDPLLSWHESNLEPAQSTSRGTMSTTTYKQVETRYNMKTNSTTSHSTSR<br>PPWAYPDSTYDTWDD |
| BmAPC11<br>(XP_01254)           | MILRPAEVAIVVMTFAEYAIQIPITIDVHPDYKDNAIKLASLAALFIMTYINI<br>TSVKLFVKVQNVFGVCKVLAACLVVIGGGIYEIAKGNSTHNLKGFEGSTT                                                                                                                                                                                                                                                                                                                                                                                                                                                                                                                                                                                                                                                                                                                                                               |

|                                 |                                                                                                                                                                                                                                                                                                                                                                                                                                                                                                                                                                                                                                                                                                                                                                                |
|---------------------------------|--------------------------------------------------------------------------------------------------------------------------------------------------------------------------------------------------------------------------------------------------------------------------------------------------------------------------------------------------------------------------------------------------------------------------------------------------------------------------------------------------------------------------------------------------------------------------------------------------------------------------------------------------------------------------------------------------------------------------------------------------------------------------------|
| 4065.1)                         | NPGSIALSLYYGLWAYDGNVSVTVVTEEIINPGVNVPLSISIAVPLITALYV<br>FMNVAYMTVLSYAEMTSGTAVAVAFGARVLGPFSFIMPLGVAVATFGCAM<br>SVQFGVTRVCYTAARGGHMLELFSYVNIKRLTPAPAVAFQAFLLTAIFISVG<br>NIKTLIQFASWFLWFFYGLAMVALLVLRKTQAAKPRPYRVPTPIPVFVLIV<br>AIFLSVLPIVEDPSVKYLMAIGFILLGVVVYTVFVYYKRTPSALIRKLTFTV<br>QILFESVPPSKDQDD                                                                                                                                                                                                                                                                                                                                                                                                                                                                           |
| BmAPC12<br>(XP_01254<br>5208.1) | MAGGKWTFCDVVRRRKIIQPHQLEAGNLKRCLSLWDVTALGVGSLGA<br>GVYVVIIGYAAFKEYAGPSIVLSFLIAGVAALFSGLCYAEFGARVPRAGSAYV<br>YSYVAIGEVAFFIGWCNILEAAMGAASLARGLSMYVDGMCNNSILEWA<br>TATMPISSSFLSPYFDLLAFVFLVIGVLLSVGGRESSAVNIAFVLLNLLVII<br>LVVIVGAINADSANWSIPSTDVPPQSGSGGFFPYGVWGTGKGAACFYGF<br>VGFDTINAAAEVVRKPKQETIPMVLIVLLTAFVCYCGISIVLTMMPYYLQ<br>NSTDAVGSFAFIFIGWEWMKWVVFVGAFAFAGILASLFGALLPLRLLYAMSS<br>DGLLVSWFSKLTSSRKSPVFATISSAAVVAILAGILELEQLILMLCIGTLLSY<br>TVVAVCVIVLRFSEYAPQSSPGFFKEVFGCGFRLATRSTARIVYAVLFLFI<br>SVCVSMALILAHVERPLIPLLVHLVLAALMLVIIMSLQPKAKEEVAFKTPLV<br>PLIPCLSIYVNVHLMALIKLQTWIRVLIWLAIGIPVYLLGLCCFKKKDKEE<br>KDIVMPHSDENGKPLPVQIVVESPTPPDSINRIGSHGDNTILEENEQSSDQI<br>RNVRNETFNIEEIKHQVIIENNEEKEAKIIDLLDQVLQAEETYGEAISLKD<br>QNIEEAPDVKEVIHRKSLGELSDAGSDVSSGNQVLSK |
| BmAPC13<br>(XP_01255<br>1684.1) | MEGDNVSKDGGALEAKMSLLNGCTVIVGSIIGSGIFVSPTGVLYKTGSVN<br>ASLLVWIASGVFSMIGAYCYAELGTMIRLSGADYAYIMETFGPFAAFVRL<br>WIECMIVRPCSQAIVALTFVYVVKPLFPECDPPEDATRLLAACILLTLFV<br>NCWSVRAATLVQDWFTYAKLLALFIIIAAGIYQLCRGQVEHFTFEGTSD<br>VTSIALSFYSGLFAYNGWNYLNFIIIEELKDPVRNLPRAIAISCALVTIVYTL<br>TNVAFYTTLSPTEVLGSAAVAVTFAERLFGWFALSIFLVAASTFGAVNGV<br>LLTSSRLFYAGAAQGQMPAMLTMTSRATPAPAVLAVALLSLLYLTVSDIY<br>ALINYVGFATWLSIGAAVLCLPVLRYTKPDLDRPIKVNLFPPVYIICTILV<br>AVPAVASPAETGIGCLMIFTAAPVYLLLLHPRTRINFLANIMHGATYLVQK<br>LTLSVRPKTK                                                                                                                                                                                                                                                           |
| DmAPC1<br>(FBPP0073<br>760)     | MYQHVQPNNNTNHIHANGHNVPKTTSTNGTMCANGSLGTEGPEAPETDS<br>SGTGRMRKPLERNGSTQNHVVHLERRLGLFSGVALIVGTMIGSGIFVSPS<br>GLLVRTGSGVGSFIIWLACGVLSLLGALAYAELGTMNTSSGAEWAYFMD<br>AYGPAPAFLFSWVSTLVKPSQMAIICLSFAQYAVEAFVTECDPPRGVVK<br>MVALVAIVMILFVNCYSVNLGMAVQNVFTA AKLVAVVVVICGGAWKLM<br>QGNTQHLSNAFNGPMPNVGAIATAFYTGWAYDGNLNLNYVTEEIKNPS<br>KNLPRSIIGIPLVTLCYALINISYLAAMSPQEMIESEAVAVTFGNRILGALA<br>WLMPLSVTISTFGSANGTLFAAGRLCFAASREGHLLDILSYVHVRRLTPAP<br>GLIFHSLIASAMVLHGTIDSLIDFFSFTAWIFYGGAMLALIVMRYTKPNYP<br>RPYKVPPIIPVVVLVISVYLVAAPIFETPRVEYLYALLFIFAGLIFYVPFVKLG<br>MTPRFMKNKVTLFFQLLLEVPTSSMAMFE                                                                                                                                                                                    |
| DmAPC2<br>(FBPP0074<br>557)     | MKPSDLLLVLEKVKFRVPLPPGVSSSTLLPKLIRTKDVKQLQDGNAQPQK<br>PKLTKCLNTLDLTSLGIGSCCGTGMVYLVAGMVAQKIAGPGVIISFIIAAIASI<br>FSGACYAEFGVRVPHTSGSAYMYSYVAVGEFVAFIIGWNMILEYLIGTSAC                                                                                                                                                                                                                                                                                                                                                                                                                                                                                                                                                                                                            |

|                             |                                                                                                                                                                                                                                                                                                                                                                                                                                                                                                                                                                                                                                                                                                                                                                          |
|-----------------------------|--------------------------------------------------------------------------------------------------------------------------------------------------------------------------------------------------------------------------------------------------------------------------------------------------------------------------------------------------------------------------------------------------------------------------------------------------------------------------------------------------------------------------------------------------------------------------------------------------------------------------------------------------------------------------------------------------------------------------------------------------------------------------|
|                             | <p>ACALSSSFDSLGTGNIAIARTISESIGTIFGKPPDFIAFGITLLMTCVLMGASK<br/> SVIFNHSLSNAVNLATWVFMMAAGLFYVDTKTWSEHQGFLPYGWSGVFS<br/> GAATCFYAFIGFDIATTGEEAHNPQKSIPKAIVGSLLVVLIAYVSVSLVTL<br/> VVPYDHINTGAALVQMWSYVNAPKCRAVVAIGATAGLSVAMFGSMFPM<br/> PRVIYAMAQDGLIFRQLSQLWHRTNVPGLATIGSGLAAALVALTVRLEILV<br/> EMMSIGTLLAYTLVSTCVLVLRYQPHSTSLVELLPAQLRTPVAHGASDSR<br/> SHVTPAEVLEVPGKLTIKRVTRGMSDSDSDSFIDDSPEGFLGGRDDQFLVS<br/> DRSENKFGSVHGAPTGPTGQATAFDAMGLNFVTRKIHDIYAYLCPGFFP<br/> WINPGQATAESGMYVTKLVGIMFGLIFFLDLFAAIGWSGGLAAFIYFILFIG<br/> IFVILLIISRQPQNRYALAFLLPGLPFIPAIATVNIYLIFKLSILTLVRFTVWM<br/> SLGFIMYFYGITHSSLEQASDDLELHVDYSKNVEEKAVWDQQSYNQTH<br/> EPVWASKEVKQPSTEQRNYGKTTSSSSSAQSSRSQGSAPEKPAGRST<br/> AGLNRPVPPPPIAGQAKGSGSGSGPPMERQYTGQFSMFVDEGQFPTWDD</p>             |
| DmAPC3<br>(FBPP0075<br>379) | <p>MARVQASDSLIPRQVFEVPPAEPNNSTADSGSQSGVKLKKQIGLLDQVA<br/> IIVGVIVGSGIFVSPKGVLFKFSGSIGQSLIVWVLSGVLSMVGALCYAELGT<br/> MIPKSGGDYAYIGTAFGLPAFLYLWVALLILVPTGNAITALTFAIYLLKPF<br/> WPSCDAPIEAVQLLAAAMICVLTLLINCYNVWVTRVTDIFTGKVVALLV<br/> IVGAGVWWLFDGNTEHWDNPFSGGLQDPGYIALAFYSGLFSYSGWNYL<br/> NFVTEELKDPYRNLPKAICISMPVTVIYMITNIAYFVLSVSPDEILSSDAVA<br/> VTFGDKMLGYMSWIMPFVAVACSTFGSLNGAIFASSRFFVGARNHGLPAA<br/> ISLINVNCLTPVPSLIFLGVLTLLLLFIEDVYVLINYSYVEALFTLISVSGL<br/> LWMRYKQPKTERPIKVNLAIPHILVCLFLVIFSCTQTPYVVGIGTHIILSGI<br/> PVYYLTIHKPVKWLADTSQAINLWCSKFFICMPNQEKFD</p>                                                                                                                                                                                              |
| DmAPC4<br>(FBPP0077<br>892) | <p>MPSSRRAILRHILSGICTKMNRTKSVPTDVMETPLNRCLNTFDIALLGIGH<br/> MVGAGIYVLTGTVAKEMAGPGIILSFILAGFISMLAALCYAEFGTRVPKAG<br/> SAYVYTYISMGEFWAFVIGWNILLEHMLGAASVARAWSGYVDSMLGGW<br/> IGNTTLELTGGIHEPGLAQYDPVLAFLVCIVYAAALAGGVKATAVFNLLT<br/> LVNIAVMVLVISVGFYADGKNWSEAEGGFLPYGVGGVIAGAATCFYAF<br/> VGFDSIATSGEEAKNPSVSIPVATVISLFFVTVGYILVSAALTMIPISEINPA<br/> ASLPEAFGQLNLSWAKYLISIGALCGMTTLLGSLFALPRCMYAMASDGL<br/> LFSCFGKINPTTQVPLNLVSGVMSACLALVFDLAKLVEFMSIGTLLAYT<br/> IVSASVILRYRPMERIHTTIRVPAVAGSPDDDDDDDEDVASQSSMDTSSPT<br/> SEMIEEVLGRLKAQFRCLEPLLGRFEPGSVSVAVMLFIFLSFAICVELK<br/> VSWTQLYTGTWWALIYGFIIFAAGTCVAIVAVHNQNTRGLIFKVPVLPFV<br/> PALGIFCNILLMVHLDVAVTWVRFVWVCIGMVVYFLYGIRNSKEGEVCSS<br/> YSILMTTSEAGKVPWGSFKATSGGKSKSKHSIFERFTGRSKPEDKKSIVEE<br/> SENETSGYS</p> |
| DmAPC5<br>(FBPP0078<br>206) | <p>MTNLWKALTRRKTEDVNEGESQLARVLNLFDLTALGVGSLGLGVYVL<br/> AGQVAFNIAGPAVTISFLIAAIAFAAGICYAEFAARVPKAGSAYVYSYVTI<br/> GEFVAFTIGWNLILEYVIGTASVARGLSGYFDSLNNNMSKALNESMHID<br/> VDFLDGYPDFLSFGMVLLLAAILAFGAKESSFLNNIFTTVNLVTIAIVLVA<br/> GAMNANVDNWRIPKDVPEGFGTGGFMPFGIAGVMAGAAKCFYGFVG<br/> FDCIATTGEEAINPKRNIPLSIVVSLIIIFLSYFGVSTVLTMMPLPYKQDKD<br/> APFPHAFDSVEWYTIKWIVTIGAVFALCTSLLGAMFPLPRILYAMGKDGIL</p>                                                                                                                                                                                                                                                                                                                                                                   |

|                             |                                                                                                                                                                                                                                                                                                                                                                                                                                                                                                                                                                                                                                                                                                                 |
|-----------------------------|-----------------------------------------------------------------------------------------------------------------------------------------------------------------------------------------------------------------------------------------------------------------------------------------------------------------------------------------------------------------------------------------------------------------------------------------------------------------------------------------------------------------------------------------------------------------------------------------------------------------------------------------------------------------------------------------------------------------|
|                             | FKRLSTVNSYTKTPLLATIVSGIFASIMAMLFNLDQLVDMMSIGTLLAYTI<br>VAICVLVLRVYQDEEMTKLVSVKAPNVFRQFFNGNSFREPNSSITKVGI<br>VVFAIFCLVWCSLQKVFDLSTGGIVALSLVGAVLILICVVIGMQPVSTIEL<br>TFKVPLVPFVPCLSVFANLYLMFQLDLNTWIRFLIWIVIGYVIYFCYGMRN<br>STQISRSRSHAEVAASALQNQGQHVNPGEFDPYKVENGGRPYEFSEKL                                                                                                                                                                                                                                                                                                                                                                                                                                      |
| DmAPC6<br>(FBPP0084<br>502) | MPAADELQSPSEMVLTPSSGNPPSSIAQPAANPAEKAQCREGSAESDSS<br>RVVIKKQLGLLEGVAIILGIIFGSGIFVSPKGVIREVESVGASLVIWVLCGLL<br>SMIGALCYAELGTAIPKSGGDYAYIFEAYGSLPAFLYLWDAMMIFVPTTNA<br>IMGLTFASYVLEPFFGGACEIPKIALQLLAAITICFLTLYLNSYYMKVTTKM<br>QNVIMFTKIAALVLIILVGLVWMMMGNVENFTRPFDNTETDPGKMSVAF<br>YSGIFSYAGWNYLNFMTTEELRDPYRNLPRAIYISLPLVTGIYVLANVAYLA<br>VLSPEMIASNAIAVTFGDKILGVFSLIPLMVAISAFGGLSVHIMTSSRICF<br>VGARNGHMPAILSHISVKSYPPLPSLVFLCFLSIVMLVSDVYVLTITYASIV<br>ESFFIMLSVSAVLYFRYTRPCMERPIKVAMWIPALFVIVCAFLVVPIYVAP<br>YEVGMGVLITIGIPFYVGVVWKNKPKWVQSTIDSVTFTCQKLFMSAK<br>EEKED                                                                                                                                        |
| DmAPC7<br>(FBPP0088<br>598) | MTDRYANGVTTSLVEPTNGCAAPGNPNPADGEEKIVLKRKLTLLINGVAIIV<br>GTIIGSGIFIAPTGVFIYTESVGSLLIWLTCGILSTIGALCYAELGTCITRSG<br>GDYAYLLVSFGPLVGFRLWLIALLIIRPTTQTIVALSAHYAVKPFPECDPP<br>QNAVKLLAAICLTLTTINCLSVKVS MKVQDVFTVGKLLALIMILSGLYY<br>MATGELENFRNPWEGIYTARNIGYAFYSGLFAFGGWNYLNFVTEELQDP<br>YKNLPRAIWIAMPLVTSIYVLVNLAYFAVVKPEMLSSLAVAVTFGNRVF<br>GPLAFMVPIFVALSTFGGVNGVLFTSARLFATGAQEGHLPKFFQLFHVKQ<br>QTPISLIFTCLMSLLMLLTDNVYQLINYFSSVLWLSVVASIAGMLWLRHK<br>RPDLRPIKVHLALPITFMVSCVTLVLLPNLEEPQNLLIGIGITLAGIPFYA<br>FIARKKKPKCYGRLSNSVVEICRAIFNTTIIESNEAIN                                                                                                                                                               |
| DmAPC8<br>(FBPP0099<br>766) | MVRQISPWKVLRTRKNLQADGSEGETKLNRLVGLWDLTALGVGSTLGA<br>GVYVLAGQIAKDQAGPSVMISFAIAALASLLAGVCYAEFGARVPKAGSA<br>YVYSYVCIGEFVAFVIGWNLILEYVIGTASVCRGISLYLDSLLNDTLKYTF<br>AEVAPMNVSFLGSYFDLAFGLVVFVGFVALAFGVETSTMANNFVTCLNIF<br>ILGFVIIAGALKADYSNWTVPSTVSANSTIGSGGFFPFGFEGTLRGAATC<br>FFGFVGFDCIATTGEEVRNPRKNIPKSILLSLLIIFLCYFGVSTVTLMLPYY<br>IQD VNAPLPYAFEYVGWPVAMWIVTVGGLVGLLASLFGALFPLPRVMYS<br>MAQDGLLKFGLKVSPRFRVPVTGSIVAALFTAIAIAGLFDLSQLVSLLSIG<br>TLLAYSVVAISIMLLRYMDYCEVDENPGQREVRASETTSLSSTSERFTFGS<br>VCTQLFNVHRVQEPNAISSRIVGVLSTLFLCLISLGIGVLMQAHLLIASKEV<br>WALTLLIVLVLMMLVICLICLQPREARRRLFRVPFVPIVPAISIFINIYML<br>QLDTWTWIRFGVWMIVGIPVFLACWYLYDCKNPAKRNPWRWDFYKALK<br>GLQESREQEYHCISKESVLTLETQLKKSPSSSLNRI |
| DmAPC9<br>(FBPP0271<br>785) | MEEFAEYYGMPSWSVTNAFRVLTRKKPLEDSNESKLAKVLSAFDLTALGI<br>GSTLGVGVYVLAGEVSKQYAGPAVVVSFLIAAIASIFAGLCYAEFGARVP<br>KAGSAYIYSYVTIGEFIAFLIGWNLILEYAIGSASVVKGLSTYLDQLCGNP<br>MSSFLGTHMPLNIEGMGAYPDLFAFVV TILFSLAIAVGAKESTRVNNVFT<br>MLNLGVVLFVIIAGLKFVSSSNWSIPKSQVPEGYGDGGFMPYGVSGIHK                                                                                                                                                                                                                                                                                                                                                                                                                                     |

|                                |                                                                                                                                                                                                                                                                                                                                                                                                                                                                                                                                                                                                                                                                               |
|--------------------------------|-------------------------------------------------------------------------------------------------------------------------------------------------------------------------------------------------------------------------------------------------------------------------------------------------------------------------------------------------------------------------------------------------------------------------------------------------------------------------------------------------------------------------------------------------------------------------------------------------------------------------------------------------------------------------------|
|                                | AAVCFYGFIFDCIATAGEEAKNPKKSIPFAVIVSLAMIFLAYFGVSTVLTMLPYFEQDEKAPLPHVFRINGWHVAEYVVSIGAMFGLCSSMMGAMFPLPRIVFAMSNDGLLKFGLGDISEKYKTPFKGTMITGMLTGILAAVFNLSQLVNMMSIGTLLAYSMVASCVLMLRYEVDDRRESRIVANGRATGLEQDRPCALWRRIFNLNGQTVPTKQTSRIVTYSVTLFSLWCMVFSQILTKFEEDLANVTSFDGIKLVLGTIPLAVLLVISRQPTSGVKLSFKVPLVPWLPGISILINIYLMIKLDILTWRFSIWIAIGLAIFLAYGIRHSRLRQREQRNNSIAMMRDCSNSALLGGQENSKYSNEVPLILMHSTS                                                                                                                                                                                                                                                                                       |
| DmAPC10<br>(FBPP0306<br>617)   | METESLNRKNSRKSIVNGNGDASAKLTNGDGDGGDGGGGEVTLKAKMSLLNGCTVIVGSIIGSGIFVSPTGVLMYTGSVNLALIVWVISGLFSMVGAYCYAELGTMITKSGADYAYIMETFGPFMAFIRLWIECMIVRPCSQAIVALT<br>FSTYVLKPPFFPECTPPEDSARLLAVCCILVLTINLWVWVAVQDIFTYAKLLALFIIIATGVYQLYLGNTQYFTFENTDTKVTSIALSFYSGLFAYNGWNYLNFIIIEELKDPVKNLPRAIAISCTLVTIVYVMANVSYFYLSPDEVMGSSAVAVTYAERAFGMLAWTIPVFVALSTFGAVNGILLTSSRLFYAGANNGQMPEILTMIIQIRFTPTPAVLAMALLSMLYLTVSDIFALINYVGFATWLSIGVAVLCLPWLRWAQPNLPRPIRVPMVFPVYLIATIFVTVVPMYASPVETGYGILMILSSIPVYLVFIAWKNKPIWFQKTMVSLTRFLQKMLMVLGKQTKPAQV                                                                                                                                                     |
| MsAPC1<br>(MSEX2.09<br>350-RA) | MWIGTSACARALSACLDLFLNGAISNHLANNFGTIYGKPPDFVAFGITLLMTVVLVAGVRKSLFFNNLLNAINLSVWVFIMAAGLYYVDLNNWTEHKGFLPFGWSGVFNGAATCFYAFIGFDIIATTGEEANPNKRSIPLAIVLSLGIILLAYVTSSMILTIVPYDKVNTDSALVQMFNYVHAPTCKYFVALGALAGLTVSMFGSMFPMRVIYAMASDGLIFRPLASVSEAAGTPAFATICGGFAAAV<br>VALLVHLEVLVEMMSIGTLLAYTLVSTCVLVLRYQPHSTNLIELLPQSLRTPVDPEGTATAVRETTFAGQSQAQMMPSGQRVMVRRVTRSSPDSDDTLPGDDSEEFGRDDTFLMNTHSENKFGAMPGGSGSNTACGRFFNALSRLHAMSYLEPGLFPWVDLGPATEQTGMFVIKAVGVMYGLVLLFDILAAYGNPGESNFTTALMVLLLIGILVILLMISRKPQNRVALMYTTPGLPFVPMTAIIVNIYLILNLSILTIVRFTIWMAGLIVYFKYGIKNSNLETNPPLPVAVTPPPPNPLDRTTIPPSSPRQSKPTGDRNIFEGDGNAFYSNFDQYSDPLLNWHVTELEPAQSTSRGPMTSSGTTYKQVESRYNAKTNSTTSHTSSRPPWAYPDSAYNWDD |
| MsAPC2<br>(MSEX2.03<br>340-RA) | MHHHEQPPGFACNGSAREGLVWRGCSASCAEDGTAGALTDGNANPGDKLEGPGAAPDDPVHLKRRVGLFSGVALIVGTMIGSGIFVSPSGLLERTGS<br>VGISFIIWMACGLLSLLGALAYAELGTMNTSSGAEYAYFMDAFGGPPAFLFSWVSTLVLKPSQMAIICLSFAKYAVEPFVSECEPPDALVKLVSVIAIVMILAVNCYSVNLATNVQNIFTAAKLVAVAIIVCGGAYKLILGNTRHLQEPNFAS<br>STATLGNIAAFYTGLWAYDGNLNYVTEEIKNPSKNLPLSIIIGIPLVTL<br>CYALVNVSYLAVMSMSEMVDSEAVAVTFGNRLLGPMAWLMPLAVTISTFGSANGTLFVAGRLCFAASREGHLLDILSYVHVRRTAPAGLIFHSLIAVAM<br>VLYGTIDSLIDFFSFTAWIFYGGAMLALIVMRYTKPHAPRPYKVPIIPIYVLLVSTYLVIGPILDKPQWEYLYAAAFILGGLLVYLPFVKWGYSLPFMDKITVFLQLVLEVPTSTTFEY                                                                                                                         |
| MsAPC3                         | MAGVKWPAFCRPRCRRKVFPDQIEDGNLRRCLNRWDLTALGVGSATG                                                                                                                                                                                                                                                                                                                                                                                                                                                                                                                                                                                                                               |



|                                |                                                                                                                                                                                                                                                                                                                                                                                                                                                                                                                                                                                                                                                                                                               |
|--------------------------------|---------------------------------------------------------------------------------------------------------------------------------------------------------------------------------------------------------------------------------------------------------------------------------------------------------------------------------------------------------------------------------------------------------------------------------------------------------------------------------------------------------------------------------------------------------------------------------------------------------------------------------------------------------------------------------------------------------------|
| (MSEX2.04<br>757-RB)           | AGIYVLIGYVALNVAGPSVVL SFLMAAVAALFAGLCYAEFATRVPRAGSA<br>YIITYVAIGELMAFLIGWCNILEAAVGAASLSSGLSLYLDSMVNGSMTAW<br>YESAMPLGVPLMSPYFNLLAFLIILCVGVLLSVGVRESAYVNNVLVGVNI<br>IVIAFIIVAGAICADVNNWYIPLTDVPEGSGSGGFFPYGVWGTMQGVAVCF<br>YGFVGFDTVNAVAEEVHRPRRTIPFTILIVLLVAFLVYSSVSIVVTMMVPY<br>YLQDRMYAVTSAFGYVGWNWARWIVFFGAIFGILSNIIGALLPLPRLLYA<br>MASDGLLFSFFAKLTSPSRKSPALATALSAVIISVLAGILDLETLILMMCLGT<br>LFSYTIVAVISVVVLRVYHSSYAPKSSPGFFKELFGCGFRLPTKGTERIVEVSL<br>ALFIAASVSSALVITHANSPLIPVVIHALVILLVIMMLQPRAKEEVSFKTP<br>LVPLIPCLSIYVNVHLMVLIKLQTWICVAVWILIGIPIYIICCCYKRKDIVE<br>DKTTARHENKNGTPPVQIVVESPTPPDTMNRISTYGGDDTIEEMDNETEG<br>SVRGLTMLAKRASEPPKTEEITIHQAYVENNEEKEAKIIDLLDQVLQAEED<br>TYGEVISLQDQKEDIPVRNEVQR |
| MsAPC4<br>(MSEX2.01<br>347-RE) | MMPEEKVRMRKQLGLLEGVTLILGIIFGSGIFISPREV LQKTGSVWGS LTV<br>WAICGGLATLGALS YSELGTTLAQSGGDYHYIDEAYGPLPAFLYLWDAIFI<br>FIPSTNAIMALT FANNVLQPIYHGCTINPLCRKLLAAVTICFLTFINAYDIKF<br>TTRMQNVFSLTMISSLVVIVMGGMVWMAQGHLENFEDGWAGTNSSVSD<br>WSVAIFLGIFS YSGWNYL NFMTEELRDPFVNL PRAIYISLPLVTAIYIMAN<br>VSYLAVLGQDVL TTEAIAVDFATAILGWL RWVMPALVCIATLGGLSVNIM<br>TSSRICFAGARNGHMPPELLAHINIKCMSPMPSLVFLMLLSLLMLIPDNLTS<br>LITYCTVVESFFTTICCSAVLWLRHKKPNLPRPIKVQLWMP SIFVAITSMLL<br>VIPVISEPFAVISGACITLAGLPAYYVLVKNTPAPIQRMTCEIILTSSFCQV                                                                                                                                                                                        |
| MsAPC5<br>(MSEX2.10<br>428-RA) | MSEKVKMRKQLGLLEGVAAILGIIFGSGIFISPKEVLVKTGSVWGALIVWG<br>ACGVLATLGAMSYAELGTTLAQSGGDYHYINEAYGPLPAFLYLWDANLV<br>FVPSTNAIMSLT FANNLLEPIFPNCPIDPMCRKLI AAATICFLTFINAYDVKF<br>TTRVQNVFMFTKILALV TIIIGGIVWIGKGGVEHFSDGWAGTKTSVSDWS<br>VAFYSGIFS YSGWNYL NFMTEELRDPFVNL PRAIYLSLPMVTFIYLLANV<br>SYLAVLGPVGV RATEAIAVDFAVGALS WVKWAMPTLVAIAILGGLTVHIM<br>TSSRMCFAGARNGHMPPELLAHINMKCMSPMPSLIFLMLISLVMLIPNNLT<br>SLITYCTVVESFFTTLSCSAVLWLR YKKPDLPRPIKVSLWMPILFVGV SAIL<br>LVVPVSEPVAVLAGAGMTLAGVPVYYALISCEPKTIRAISTKFTHLCQKL<br>FLSAVEEQEE                                                                                                                                                                              |
| MsAPC6<br>(MSEX2.08<br>056-RA) | MVGKIAAPAIAARFARRSPKSKEAECESVTLKSDLDADVESKDGGGALE<br>AKMSLLNGCTVIVGSIIGSGIFV SPTGVLKYTGSVNASLIVWITSGIFSMIG<br>AYCYAELGTMIRQSGADYAYIMETFGPFAAFIRLWIECMIVRPCSQAIVAL<br>TFSVYVLRPVFPECEPPNEATRLLAACCILLLTFVNCWSVRAATRVDWF<br>TYAKLLALFIIIAAGAYQLCMGKVEHFTFEGTTDSVTSIALSFYSGLFAYN<br>GWNLYLNFIIIEELKDPVRNL PRAIAISCALVTIVYTFTNIAFYTTLSPT EVLG<br>SAAVAVTFAERLFGWFALSIPLFVAASTFGAVNGVLLTSSRLFYAGAAQGGQ<br>MPAMLTMTTRATPAPAVLAVALLSLLYLTVSDIYALINYVGFATWLSIGA<br>AVFCLPVLRYTRPNLERPIKVNLFFPIVYIICTVLVAVPALASPAETGVGC<br>LMILTAVPVYLLLHPRTKMNCLEAVMHRATYLVQKLTMAVRPKVKMFL<br>HVNTSDHISDYSKPDQSVPMVYDH                                                                                                                |
| MsAPC7                         | MSAQDAEPAEKYETANGVASACGSTVKLRRELGLFSAVNLILGVMIGSGI                                                                                                                                                                                                                                                                                                                                                                                                                                                                                                                                                                                                                                                            |

|                                 |                                                                                                                                                                                                                                                                                                                                                                                                                                                                                                                                                                                                                                                                                                                   |
|---------------------------------|-------------------------------------------------------------------------------------------------------------------------------------------------------------------------------------------------------------------------------------------------------------------------------------------------------------------------------------------------------------------------------------------------------------------------------------------------------------------------------------------------------------------------------------------------------------------------------------------------------------------------------------------------------------------------------------------------------------------|
| (MSEX2.01<br>235-RA)            | FVSPASALEYSGSVAMCLIIWTVSGLISLLGALSFAELGTVVGKSGAEYAY<br>FQEAFGKIHKFWGPLPSFSCAWIYVVILRPAEVAIVVMTFAEYAIQPFTPDL<br>QADYKDKAIKLTSLAALFIMTYINITSVKLVKVNIFGVCKVFACLVIG<br>GGIYEIAKGNTENLDKGFEGSTTSPGGIALALYSGLWAYDGNVSVTVVTE<br>EIINPGVNVPLSISIAVPLITALYVFMNVAYMTVLSYAEMTSVPAVAVAFGT<br>RVLGPASFLIPLGVAIATFGCAMSVMQFVTRVCYTAARSGHMLEVFSYVN<br>LKRLTPAPAVAFQAFLTSIFISVGNIKTLIEFASWFLWFFYGLAMVALLVLR<br>KTQADKPRPYRVPTPIPCFVLLVAIFLSILPIVHDPSTIKYLMVGFIVLGFIV<br>YTIFVYYKKTPTTLRKFITQVLFESVPPSKEQD                                                                                                                                                                                                                         |
| MsAPC8<br>(MSEX2.12<br>361-RA)  | MAKVGDDVDGLPSRAMDSGLETVDGGDQESNGSVRLKKEGLMNGVAII<br>VGVVVGSGIFVSPHYVLKFAKSGMALIVWVLSGILSMIGALCYAELGTM<br>IPKSGGDYAYIGEAFGNLPAFLYLWGALFILVPTGNAITALTFAEYILKPLW<br>PECHPPTAAISLIAAITCFLTVINCYNVKWVTRVQDSFTAAKILALLITFFA<br>SLWYLFSGHTENLQNMMEGTTTKPGSIAAFFTGLFSYSGWNFLNFVTE<br>ELKDPYKNLPRAIRISMPVVTLVYALANVAYFAVLTNDEVLVSEVLAVTFS<br>EKILGKVAWIMPLFVAMCTVGSNGAIYASSRFFVGARNGHLPLAISLID<br>IRRLTPVPSLIFMCVVTLTLISTDIESLMLIVSAVEAMFTLCSVAGLLWMR<br>HTLPQKMRPIRVNLILPIVFLITCTFLVIFCFENPIKVGIGIAFIALGVPIYLI<br>FIQWSNPKWLQSACNSFNITCSKMFLCIPEDSKEL                                                                                                                                                                     |
| MsAPC9<br>(MSEX2.12<br>357-RA)  | MGEDSQAVNGKVVLKRKITLFGVGHIIIGTIIGSGIFISPTGVYLYTGSVAA<br>SLIIWLVCGLLSTLGALCYAELGTSITRSGGDYAYIYAFGLPAFLRLWIA<br>LLIIRPTTQAIVALTFGNYVVKPFPECDPPQNAVRLLAHVCLCILTAINCLS<br>VRWTMRIQDVFTTSKLLALIVIIIAGIYYICIGNTSNFDNAFEGEYSAGNIA<br>LAFYSGLFAFGGWNYLNFVTEELQDPYKNLPRAIWIALPMVTIIYVMAN<br>LAYFAVVSMMEMMSNPAAVAVIFGDRLFGRWSWVIPVFVALSTFGGVNGV<br>LFTSARLFATGAQEGHMPAFFSLFHVDKQTPIPSLIFTCLFSLMLTTSNVY<br>DLINYYSQLWLSVGASVVGMLWLRRTKPDIPRIKVNIVIPYVFLIAIACL<br>VIIPAIIKQPQDTIIGIAILLSGIPVYYVCVKWQSKPESYHTISGCVLRFLQKA<br>CSCMYVDSTEKLADN                                                                                                                                                                                   |
| MsAPC10<br>(MSEX2.01<br>857-RA) | MPGARHKILGHVLSGFCHKMNRKPLYGDAMDTPLNRCLTTLDITLLGV<br>GHMVGAGIYVLTGTVARYMAGPATALSFLLAGITSTLAALCYAEFGTRIP<br>RAGSAYAYTYVSIGEFWAFIIGWNIVLEYMIGAASVARAWSGYLDAML<br>GAISNATISLTGELHETLLSRYPDLLAFLICIVASLILAVGVKTSAYINNGITI<br>LNLLVISLVIFLGFYADITNWSEKNGGFMPYGFSGVLAGAATCFYAFVG<br>FDSISASSEAKDPSRSIPIATVLSMAMVAFGYILVALALTLMPYKSINAE<br>AALPAALGAVHADWAKYAVAVGAVCGMTTLLGSLFSLPRCLYAMSADG<br>LLFGFLSDINNKSQIPIANLFISGLSSALIALLDLEKLVFMSIGTLLAYTIV<br>SAAVILRYRPTPVVDDKIFGVPLDQSPGDREDSSATGTPATDGGSSSEM<br>EALTVGRLRAQYAWLEPLAGGRAPGAAVTSCVYTFVATAVLCANHF<br>AEPAGLWALLPDFVLSFIIIACLVIIWAHQSPTRLPRVPPVPLPAASVM<br>LNVELMINLNALTWARFAIWMFTGLLLYFLYGIHHSKLGEGVTGLLSRSG<br>SGGGNSGGWGAVEKTNAIARRVGRFARGSKGDDRKPIICDELSSRRDP |
| MsAPC11<br>(MSEX2.04)           | MTLIMSGIKAGASRAVNLAYRVLRSRKAEEGAARLARVLSALDLTALG<br>VGSTLGVGVYVLAGDVAKNYAGPAVILSFLLAAVASVFAGLCYAEFGARV                                                                                                                                                                                                                                                                                                                                                                                                                                                                                                                                                                                                            |

|                                 |                                                                                                                                                                                                                                                                                                                                                                                                                                                                                                                                                                                                                                                                                    |
|---------------------------------|------------------------------------------------------------------------------------------------------------------------------------------------------------------------------------------------------------------------------------------------------------------------------------------------------------------------------------------------------------------------------------------------------------------------------------------------------------------------------------------------------------------------------------------------------------------------------------------------------------------------------------------------------------------------------------|
| 753-RA)                         | <p>PKAGSAYVYSYVCVGEFIAFIIGWNLILEYIIGAASVVKALSEYLDSSLNK<br/> AISTHLEAAMPLDSPHLARYPDIFAFGVIMVFSVALAFGVKESTKFNNLCT<br/> GVNLCVVLVFIISGSFKADTKNWRIPSEVPKSETKDFGTGGFAPYGLAGI<br/> IKGAAVCFYGFIFGDCVATAGEEARPQKSIPFAVVASLLVFLAYCGVSS<br/> VLTLMIPYYMQDEKAPFPYVYDRLGWTWAKYAVSVGAICALCSSLLGAV<br/> FPLPRIIYAMSSDGLLFLGRVSERFQTPLIGTIIAGLFTGTLAMIFELEQLI<br/> HMMSIGTLLAYSMVASCVLLLRERYERTTAHKAAEPLNLTLSRSGFRQIFNAD<br/> KHLAPTPLSSAMVTVLVSLYGVWCFVMMLSINQYGEEILSGRPGPIALLS<br/> TGTLVLVLTLYAISRQPVSEKKLAFSVPLVPWLPGISILINVYMLNLDYM<br/> TWIRFAVWIAAGLLIYFTYGAWHSSERRRTLDSVQLADLHNSHTALLK<br/> HNGHTQQHD</p>                                                                                |
| MsAPC12<br>(MSEX2.04<br>756-RA) | <p>MGCARILAVLRRCKRLDDDDNSTQLARCLGLDLTALGIGSTLGLGVYV<br/> LAGAVAKTVAGPAVTISFLVAAIASAFAGLCYAEFAARVPKAGSAYVYSYV<br/> SVGEFIAFTIGWNLILEYVLGTASVAKGMALYIDSLFNNTMAKAMTEAAP<br/> INVSFLATYPDFFAFGLVMIITVLLGIGVAESTKLNNVFTGLNLLTIITVVVA<br/> GATTSDPANWNIKLSDIPPEYVSKAGEGGFMPWGVAGIMAGAAKCFFGF<br/> VGFDCVATTGEEAKNPKRDIPLSIVMSLVVIFVSYFSIATVLTMMLPYYLQ<br/> DADAPPHVFTEANMPVIKWIVTIGAI FALCTALLGTMFPLPRVLYAMGS<br/> DGVLFRLAKINPKSQTPILATFVSGLLSATMAALFNLNQLIDMMSIGTLL<br/> AYTIVATSVLILRYEEESPIPVQAALPIPETPLSVVRQTFNLLGLKYPSQLSA<br/> TIAKSTISILFVVALVTCVLLRWEVSGAALGVLGAALVLLLVLVLYRQPRN<br/> NVQDLFAVPLVPLVPLVSVCMNVYLMVQLDYQTWVRFIWLIIIGYLIYF<br/> FYGIRNSSLSLPAKSQVDEKKQNHVVTTKF</p> |
| NvAPC1<br>(NV13760)             | <p>MPKKVPCNRERAKAILHGEDAPIVEAANNKPAQSDSSSDSGVQLKKQ<br/> IGLIDGVAIIVGIIVGAGIFVSPKGVKSSGSGVQALIVWIFSGFLSLVGALC<br/> YAEFGTMIPKSGGDYAYISDAFGPLPAFLYLWVALFILVPTGNAITAIFAQ<br/> YILQPLWTGCEPPYEAIRLLAAVVTCFLTAINCYNVKWATRVDQAFGTGI<br/> FALVIVLAGLYWLCLGNTENLQHPMAGSNSEPGYVALAVYSGLFSYSG<br/> WNYLNFVTEELQEPYRNL PRAICISMLITVVYVLANVAYFVVLTRDEILA<br/> SNAVAVTFGDKLLGPM SWIIPFFVACSTFGALNGAIFASSRFFVGARNGH<br/> LPTALSLINVQNLTPMPSLIFLCIITLVLLFIKDVYTLINYSVFVEALFTMSI<br/> TGLLWLRYPDLHRPIKVPLALPIIFFIICAFVTLPCYVTPWEVGVGIAF<br/> VLCGIPVYVWFIYWPKKPKWLISASDKFNMLCAKIFLCVQEDKHD</p>                                                                                                     |
| NvAPC2<br>(NV12558)             | <p>MPSVRRMILGHVMSGMCAKINRKKKLEGDVMDTPLKRCLSTFDITLLGI<br/> GHMIGAGIYVLTGPVARDIAGPGVILSFLLAGLASLLAALCYAEFGAKVP<br/> KAGSAYVYAYVSVGEFVAFVIGWNIILEHMIGAASVARAWSGYVDSLGS<br/> RAISNFTKRLMSGYSMDEPLGNVDPVAAALCFVYALLLALGVKCSAAV<br/> NSLLTLVNLGVMALVICLGFYYADLGNWNFQGHGFLPYGITGVFAGAAT<br/> CFYAFVGFDSIATSGEEARDPTRSIPRATGLSMAIVTVGYILVSAALTLEP<br/> YSRISRTAALPEAFAARGIPWAKYVISVGALCGMTTTLFGSLFSLPRTMYA<br/> MASDGLLFGFLARVSKRTQVPTINLAIAGFVSGLIALLFDLDHLVEFMSIG<br/> TFLAYTIVSASVIVLRYRPPPPSQAMDNTVSSDTTLASSSTHQLASPANT<br/> DLAMDSSDCNSMCTSVESQLIQGFCTDGIGRVQPRYAWLSNFLGDCEPGT<br/> AVTTSIIFYSVACVSLCSLLVFLSQNTYSPAWWDYVMLINLVIIILVASLLVIA</p>                                        |

|                     |                                                                                                                                                                                                                                                                                                                                                                                                                                                                                                                                                                                                                                                            |
|---------------------|------------------------------------------------------------------------------------------------------------------------------------------------------------------------------------------------------------------------------------------------------------------------------------------------------------------------------------------------------------------------------------------------------------------------------------------------------------------------------------------------------------------------------------------------------------------------------------------------------------------------------------------------------------|
|                     | AHQQNPPSLGCTFRVPMVPLVPALSILLNIGLMFHLSMLTWLRFVWMI<br>GLLIYFLYGIHYSKEAVDPNSYAVLMETAEAEARGAKWGSLRLNRKSDTTP<br>ILGSEEYLH                                                                                                                                                                                                                                                                                                                                                                                                                                                                                                                                       |
| NvAPC3<br>(NV13071) | MTCARLWRALSRRRQDELTAKSELARVLGIIDLTAALGVGSTLGLGVYVL<br>AGSVAKDTAGPAVCISFLIAAIAAFAGMCAEFSSRPKAGSAYVYSYVT<br>VGEFIAFVIGWNLILEYVIGTASMARGVSSYIDVLTNYTIERALHEAMPIK<br>VSFLSQYPDFALGMVILLTLFLSIGVKESSMLNNVFTTINLITISIIVSGII<br>KADPSNWSIDVLDIPMNVNTPGTGGFMPFGIKGVMEGAAICFYGFVGF<br>AVATTGEEAKNPQRNIPLAIVLSLAIIFLAYFSISTVLTMMWPYYDQDAQA<br>PPFYVYDQIGWPTVKWIVNIGAVFALCTSLGAMFPLPRVLYAMASDGI<br>FKFLATVHPKTMPTLLGTALSGLLTGIMTLLFDLQQLINMMSIGTLLAYTI<br>VAVSVLILRYQKEELSTQLSNPKTTGPMYSTPANYFKQIFNLYNQKEPTHF<br>STLTAKYAVLLFGIIVFIIGILVNNCNVLEGKLPVIFAILALLALLTATAIGR<br>QPVQQIELSFKVPLVPFIPCLSIMINLYLMLQLDMNTWIRFAAWMVIGFCI<br>YFFYGVRHSVQGERERLEAETLARKYADQVQVVTKC |
| NvAPC4<br>(NV50138) | MSKAKKEDEVEQVGLKRELGLMSAISMIAAVMIGSGIFVSPASALAHSGS<br>VGFCLIIWIVCGILSLLGALAFELSAVVPRSGAEYAYLMDAFSPHRYFG<br>PLPAFICSWVVFVLRPAEVAVVILTFAEYFVQPFEPYVGETREHWDHVK<br>KLIAILALGLIVYINLRSVKLFVKVQNVFTVCKIAACILVIVGGIWWLATG<br>HTELLSDPFNTTTKPGEIALAFYGGWLSYDGTAAAVVAEEVQRPEINI<br>LLSIVIAVPIITVLYVSMNLMYMSAIPVQEMISAPTVAIWAKNVLPWLIF<br>AIPLGVALSTFGCALSLQFGVARLCYVAGREGHVPSFFSWVHYERMTPAA<br>AVTLQGLLSLFFMLVGDILKLIDFASFLIWFYGLSMVALIIMRRTKPDVK<br>RPYRVPIFIPWLVLFIIFLTVMPIIDNPSLMYLFVLFILLGCMYHFYVYK<br>KRKSRFARKLTYLVQMLFMVVPDEVESESEDEAASKKLTKAAS                                                                                                             |
| NvAPC5<br>(NV14792) | MAKGTKVMENVREGDDKVRMCKQLGLLEGVAIILGIIIFGSGIFISPKGVI<br>QEVQSVGLSLVIWVLCGLLSMIGALCYAELGTSIPRSGGDYAYIHESFGDL<br>AAFLYLWAANLIFVPTTNAIMALTFAKYVLQPFVVCVAVSDSAVRLLAAATI<br>CFLTYVNCYDVKETTKMQNVFMFAKVGALVIVILTGLSWLFMGHAENFE<br>KAFESTNTDPGKIAVAVYSGIFSYSGWNYLNFMTTELKDPYVNLPRAIYIS<br>LPLVTLIYVLANVAYLAVLTPDEMIASEAIAVSFGGKILGVWSWIIPVMVAI<br>SAFGGLSVHIMTSSRMCFVGARNGHFPAMLSHINVKRYTPTPALVFLCILS<br>LIMLCTSDVFLITYCSIVESTFIMLSVAGILYLRKCPDMERPIKVSLEWIPI<br>TFVLICAFVLVPCYERPVEVGMGVLITLSGIPAYLIGVAWKNKPAKFQEI<br>NAKITHVVQKLFLSAREEQEADY                                                                                                                     |
| NvAPC6<br>(NV14736) | MHLNDLYTAFSRKKQIDAPGDSSLARCLSTLDTALGIGSTLGVGVYVLA<br>GSVAKTIAGPAVIISFAIAAFASMIAGLCYAEFGARVPRAGSAYVYSYVTM<br>GEFIAFLIGWTLILEYVIGSASVVRGLSTYVDALFNNSMRNAFESAAPIDIS<br>HLSSYPDFFAFGVTLAFSAALAFGAKESSVANNLFTLANLTVVLFVVIAG<br>AFKADMNNWKLKPSCTKTKCPNGNGGFMPLYGLPGVITGAATCFYGFIFG<br>DCVATTGEEAKNPQRSIPIAIVSLTVVFLAYFGVSTILTTPVLPYEQNADA<br>PPPYMFDYIGWNWARYVVSAGAICGLCASLLGSMFPLPRVIYAMASDGLI<br>FKWMGKVSSRFHTPLMGTLASGLLTVLAAVFELSQLINMMSIGTLLAY<br>SIVAACVLILRYEESKSFETRNDIESYSVSSIVKQLVNYKRLTYSTRLTSKI                                                                                                                                                      |

|                     |                                                                                                                                                                                                                                                                                                                                                                                                                                                                                                                                                                                                                                                                                                                                                                                                                                                                                                                            |
|---------------------|----------------------------------------------------------------------------------------------------------------------------------------------------------------------------------------------------------------------------------------------------------------------------------------------------------------------------------------------------------------------------------------------------------------------------------------------------------------------------------------------------------------------------------------------------------------------------------------------------------------------------------------------------------------------------------------------------------------------------------------------------------------------------------------------------------------------------------------------------------------------------------------------------------------------------|
|                     | VTSLVFSYFIACIALTSLISISYKEITDGNFTMLIPLLLLLTIVLILILLFIYLQPN<br>CDKQLSFSVPFVPIFGLSILINVYLMMLLDVMTWVRFGIWMIVGLGIYF<br>FYGVWNSTIRTRNSAKNVNQNDWKNQDVPKLT                                                                                                                                                                                                                                                                                                                                                                                                                                                                                                                                                                                                                                                                                                                                                                         |
| NvAPC7<br>(NV15895) | MRNNCWPKAGQEQEGPASSFLQEQQQQQQQQQQQQQPNFQGGPLGN<br>DQDGGGCRGLEQDPEKDDPVHLKRRVGLVSGVALIVGTMIGSGIFVSP<br>SGLLVRTGSGVMSFIVWTGCGLLSLCGALAYAELGTMNTSSGAEYAYFM<br>DAFGAPPFLFSWVSTLVLKPSQMAIICLSFAQYAAEFAEEDPPPQVVK<br>LVALLAIVLILLVNCYSVNLATGVQNAFTAGKLIAILVIVAGGSYKLIQNT<br>QHLHQPFRIEESQGETVKAVFNIGKLATAFYTGLWAYDGWNNLNYVTE<br>EIKDPSKNLPRSIMIGIPLVTLCYALINVSYLAVMSPIEMIDSEAVAVTFGNR<br>ILGAMAWLMPLSVAVSTFGSANGTLFAAGRLCFAASRQGHLMDCLSYVH<br>VRRFTPAPGLIFHSLVAGAMVLSGSIDSLIDFFSFTAWIFYGGAMLALLVM<br>RRTRPNHPRPYRCPLLIPVLVLLISIYLIVAPIIEKPKQIEYLYAAGFIAAGMLF<br>YLPFVKYGYVPKFMEGVNAFLQVLLLEVAPTAFAFD                                                                                                                                                                                                                                                                                                                             |
| NvAPC8<br>(NV10182) | MSKSSGSLKSTKGSIKGSIKDGETNNGPYDSPGVGGDEIKLEAKMSLM<br>NGVTVIVGSIIGSGIFVSPSGVLQYTGSVNASLLVWTASGLFSMVGAYCY<br>AELGCMIRKSGADYAYIMETFGPFMAFIRLWIESMIVRPCSQAIVALTFST<br>YVLKPFPPDCEPPQDAARLLAVCCICVLAFINCWDVKWATRVQDIFTYAK<br>LLALFVIIAGAGGYQLVKNQQTQHFTFDGTTTEVTQIALSFYSGLFAYNGWN<br>YLNFIIEELKDPVRNLPRAIASCTLVTVIVYVLTNVAFYTTLSPNEVLNSKA<br>VAVTFANRLFGPMAWTIPVFVALSTFGAVNGILLTSSRLFYAGACEGQMPE<br>ILTMQTSRMTPTPAVICMALLSMLYLCSSDIVALINYVGFATWLSIGVSVL<br>CVPWLRWAQPNLPRPIRVNLAFFIVYILCTLFVTIVPMYSSPVETGYGCLM<br>ILSSVPVYFAFIAWKNKPKFFQKSVVSFTKFLQKVILVVGKPKPAKI                                                                                                                                                                                                                                                                                                                                                                |
| NvAPC9<br>(NV10224) | MAALSGFEGLHTRESCIMKLDKDFMDREKGLELFGKFIRTKNIDNLQGEQA<br>RAGSEQYSAGSKQKLQKCLTTLDLTSGLVGVSCVGTGMYLVAGMVARSV<br>AGPGVVIISFIIAIIASIFSGACYAEFGVRVPHTTGSAYMYSYVTVGELIAFII<br>GWNMVLEYLIGTSACACALSACLDALANGAISGAIGDTFGTIFGRPPDFL<br>AFVITLLMMLLMAAGVKKSLVFNNVLNALNLAVWVFIMAAGMFYVDS<br>ANWTEHRGFMPFGWSGVFTGAATCFYAFIGFDIATTGEEATNPKRSIPLA<br>IVSSLVILLIAYVSSSMVLTLIVPYDEVDQDSALVEMFGQVGAYKCKYIVAV<br>GALAGLTVSMFGSMFPMPRIVYAMAQDGLIFRSLSQVWPLTGTPALATLT<br>SGLCAAVAALLIQLEVLVEMMSIGTLLAYTLVSTCVLILRYQPHTTNLVEL<br>LPQSLRTPCRSPTKDTQANGHQVGYGKELRPDQLTTALNTAQSHASQSEL<br>GISSNGQRIMVRRVRRANSSSPDSDDTYGGEDEIGLGKDDQYLVSDRTE<br>NKFYGSVHAAAAGSSCGSAHQYPGNTPIIGPPLNYLQRRQLQAAQYLCPAI<br>FPWVDRGPATEASGRYVMKLVGILYLLILIFDLIIVCGMGMNMGFTTFLLF<br>VFFFAIIAVLLAISRKPNRNSMMFMTPLPFVPAIAVTVNIYLIFKLSILT<br>VRFTVWMTLGFIVYFYYGIKHSSLEEGNAEAAAETSAGGNIELTVDPSK<br>SSHHPQPASSPYATSDRSIYEGQQLDAFGQPVFGSTNFGGTPSSHQQQSGT<br>SGTSGTPLFVPPDSFSPSWDD |

**Table S8.** CDS sequences of the APC transporters of the *B. tabaci*.

| Gene   | CDS sequences                                                                                                                                                                                                                                                                                                                                                                                                                                                                                                                                                                                                                                                                                                                                                                                                                                                                                                                                                                                                                                                                                                                                                                                                                                                                                                                                                                                                                                                                                                                                                                                                                                                                                                                                             |
|--------|-----------------------------------------------------------------------------------------------------------------------------------------------------------------------------------------------------------------------------------------------------------------------------------------------------------------------------------------------------------------------------------------------------------------------------------------------------------------------------------------------------------------------------------------------------------------------------------------------------------------------------------------------------------------------------------------------------------------------------------------------------------------------------------------------------------------------------------------------------------------------------------------------------------------------------------------------------------------------------------------------------------------------------------------------------------------------------------------------------------------------------------------------------------------------------------------------------------------------------------------------------------------------------------------------------------------------------------------------------------------------------------------------------------------------------------------------------------------------------------------------------------------------------------------------------------------------------------------------------------------------------------------------------------------------------------------------------------------------------------------------------------|
| BtAPC1 | <p>ATGTCCCAAACGCCGGAGCCTCCGCCGGAGAAGGTGCCGCTGCGGGCG<br/> ACGATGGAGGACATCGACTTGGGCTCGGACACGGAGACGGACAAGAA<br/> GGACGACTCGGAGGTCAAGCTCGAGGCGAAGATGTCCCTCCTCAACGG<br/> GATCACCGTCATCGTCGGGAGCATCATCGGCTCCGGGATCTTCGTCTCG<br/> CCGTCCGGGGTGCTCAGGACCACGGGCTCCGTCAACATGGCGCTCATC<br/> GTTTGGACTATATCCGGTGTCTTCTCCATGGTTGGGGCCTACTGCTACGC<br/> GGAGCTGGGGTGCATGATCTCCAAGTCGGGGGCCGACTACGCGTACATC<br/> ATGGAGACGTTCCGGCCTTTCCTGGCGTTCATCCGGCTCTGGATCGAGT<br/> GCATGATCGTCCGCCCTGCTCCCAGGCCATCGTCGCCCTCACCTTCAG<br/> CATCTACGTCCTCAAGCCCTTCTTCGTGACTGCGACCCGCCCGACCTAT<br/> CCGTCAGGCTCCTCGCCGTCTGCTGCATAATGGTGCTGACGTTTCATCAAT<br/> TGCTACTCTGTGAAGTGGGCGACCAGGGTCCAGGACTACTTCACGTACG<br/> CTAAACTACTCGCCTTGTTTCGTATCATCCTTGCGGGAGTCTACCAACTT<br/> TTCCAAGGACAACTCAACACTTTACGTTTGACAACACCACAACGGAA<br/> GTTACGTCCATAGCACTGTCATTTTACTCTGGACTGTTTCGCATATAACGG<br/> CTGGAATACTCAACTCATAATAGAAGAGTTAAAGGATCCCGTAAGG<br/> AACCTACCGAAAGCCATAGCTATATCGTGTTCTTTGGTGACTGTCGTCTA<br/> TGTGCTGGCGAATGTGGCGTTCTACACGACACTCTCACCGCAAGAGGTG<br/> CTGAATTCCGAAGCTGTAGCAGTGACTTTTGCTGACCGACTTTTCGGAG<br/> TGATGGCTTGGACAATTCCTGTGTTTCGTGCGCCATGTCTACTTTTGGAGCA<br/> GTCAATGGAGTACTTTTAACATCTTCAAGGTTATTCTACGCCGGGGCATG<br/> TGAAGGACAAATGCCAGAAATTTTAACAATGATCCAAATCACAGACTA<br/> ACCCCTGCGCCTGCTGTTCTTTGTATTGCGTTCCTGTCCATGCTGTACCT<br/> TACAGTCTCTGATATTTACGCGTTAATAAATTACGTTGGATTTGCTACTTG<br/> GTTGTCCATCGGAGTAGCTGTTCTATGTCTTCCAGTGCTGAGATACACAC<br/> AACCAAACTACATCGACCAATCAAAGTGAACCTCTTCTTCCCCGCGTT<br/> GTACATAATTTGCAGCGTTTTTCGTAAGTGTGTTCCCTATGATCGCCAGCC<br/> CTGTTGAGACAGGTATCGGGTGTCTGATGATTTTGACTAGTGTTCCAGTG<br/> TATCTTGTCTTCATAGCTTGGAAAAACAAACCAAGCCATTGCAAAGAG<br/> CTGTCGTAAAAATGACACATGCTCTACAGAAGTCAATGATGGTCGTTGG<br/> TAAGCAGTCGGCCCCATCCACACTATAA</p> |
| BtAPC2 | <p>ATGACATCTAGCTCTGAGCTGGGCACGCCAATGGTGCCGTTGGCACCA<br/> AACAGGAAAAAGTATGCATGAAGAAGCAGCTAGGGTTGTTGGAAGGAG<br/> TTGCCATCATCCTAGGAATTATTTTGGATCAGGTATATTTATCTCACCGA<br/> CTACAGTCATCCAAGATGCCAAATCTGCAGGTCTTAGTTTGCTTATCTGG<br/> GTGTTGTGGTATTCTATCCATGGTCCGGTGTCTTATGCTATGCTGAATTG<br/> GGGACATCTATAACCAAGTCCGGTGGTGACTACGCCTACATCTTTGAAG<br/> CGTTCGGCCCTATTCCAGCTTTTCTATACTTGTGGGATGCCATGCTCATCT<br/> TTGTACCCACAACGAATGCTATCATGGGATTAACGTTTGCCAATTATATAA<br/> TCAAGCCTTTCTTCCCCACTTGTGATGTTCCCTGACCTACCAAAAAAGCT<br/> GATTGCGGCCAGTGTTATCTGCTTTTTGACGTTTTTGAAGTCTACAATG</p>                                                                                                                                                                                                                                                                                                                                                                                                                                                                                                                                                                                                                                                                                                                                                                                                                                                                                                                                                                                                                                                                                                                                                                             |

|        |                                                                                                                                                                                                                                                                                                                                                                                                                                                                                                                                                                                                                                                                                                                                                                                                                                                                                                                                                                                                                                                                                                                                                                                                                                                                                                                                                                                      |
|--------|--------------------------------------------------------------------------------------------------------------------------------------------------------------------------------------------------------------------------------------------------------------------------------------------------------------------------------------------------------------------------------------------------------------------------------------------------------------------------------------------------------------------------------------------------------------------------------------------------------------------------------------------------------------------------------------------------------------------------------------------------------------------------------------------------------------------------------------------------------------------------------------------------------------------------------------------------------------------------------------------------------------------------------------------------------------------------------------------------------------------------------------------------------------------------------------------------------------------------------------------------------------------------------------------------------------------------------------------------------------------------------------|
|        | <p>TGAAAGCAACAGCAAGGACCCAGAATGTTTTTATGATAGCCAAGATCGC<br/> TGCTCTGTGCATAATTATTCTTGCTGGGCTTGCATATATGACTTTTGCGGA<br/> TAGAGGAATGACGAATTTGAAGACGTGTGGGCAAACACAACCTCTGA<br/> CGCAGGCCAAATTGCAGTTGCATTTTACTCAGGCATTTTCTCCTATTCTG<br/> GCTGGAACCTACCTGAATTTATGACAGAAGAATTGAAAAATCCCTACGT<br/> AAATCTCCCAAGGGCAATTTATATCTCTTTGCCAATTGTGACCTTATCTA<br/> TGTGTTGGCAAATGTGGCGTATTTGGCTGTTCTAACCCCTGTTGAAATGA<br/> TACAGTCGGAAGCCGTGGCAGTGTGCTTTGCTGATTCCATCATGGGCC<br/> TCTAGCATGGACCATGTCATTAATGGTAGCCATGTCAGCATTCGGAGGTT<br/> TGAGCGTGCACATCATGACATCATCTCGAATGTGCTTCGTTGGGGCTCG<br/> CTATGGCCACTTCCAGCCATGTTGTCGCACATCAGCGTTGATAGATTCA<br/> CGCCAACCCCTTCCTTAGTTTTTCTCAATATTCTCTCGTTAATCATGCTAT<br/> ACACTAGTAATGTCCGTGATCTGATCACTTATTCTACATTTGTAGAATCAT<br/> TTTTCATCACACTCTCAGTGAGTGGCCTATTATACTACGTGGAAACAA<br/> CCCAACAGACCACGACCTATCAAGATTCCATTTGGATTCCCTATTCTTTT<br/> TGTCATCCTGTGTCTCTTTCTGGTCGTCTCCCATTCCTTTGACTCGCCGC<br/> TGGTAGTTGGAGTCGGAAGTCTCATCACTCTAAGTGGTGTGCCAGTTTA<br/> TTATTCGGAGTCGTTTGGCAACCCAAGCCAAAATGGTTCCGGAGCGCT<br/> CTGGATAAAACAACGTACGTGCTACAAAAACTGTTTATGTCTGCCAAGG<br/> AAGAGCGTGAACCTGTGA</p>                                                                                                                                                                                                                                                                |
| BtAPC3 | <p>ATGGTCTCATTTTGGGACTCGATATCGCAGCGAAAGACTTTTACGTGAT<br/> AGCAAAAGAGGAGTCTAAACTCAAAGAGTCCTGACCACCTATGACTT<br/> GACAGCTTTGAGTATTGGCAGTACACTCGGAATCGGTATTTACGTTCTTC<br/> CGGGAGCTGTAGCCAAAATGTCGCCGGACCCAGCGTTGTTCTTTCTTT<br/> TGTTCTCGCTGCCTTTGCGTGCGTCCTTTCCGGAATTTGTTATGCTGAGC<br/> TCAGTTCGAGAGTGCCAAAGGCAGGGTCTGCCTATATCTATGCCTATGTA<br/> ACGGTTGGCGAACTAATGGCTTTTATCATTGGATGGGTAGTCATCATGGA<br/> ATACGTAATAGGTGCCTCCAGTGTGCTCGAGGCCCTAAGTGTTTATGTAG<br/> ACTCTCTGTTTAATGGGACGATGGAAGCAACTTTTCGTGAGGTCTACCA<br/> GATCGAAAATGTACCGTTTCTTTACCTTATTTTCGACTTTTTTACATGTGC<br/> TGTCTGCATCATTTTAGGAATTGCTCTGAGTGTGGGTCTCAAAGAATCAG<br/> CGCGAATGAACAATGTGCTAGTGGTCATTAATGTCGCCGTTATGCTGATT<br/> GTCATAGGAGTTGGAAGTCTGGAAGCCAACTTCCATAACTGGGCACTGA<br/> CTCCCAAAGAGGTGCCCTCCGGTTATGGGGTCGGAGGTTTCTTTCCGTA<br/> TGGTGTACAGGGGCAATAGCTGGAGCAGCAACATGTTTTTACGGATTT<br/> GTCGGTTTTGATTCCATCACACCACAGGTGAGGAGGTAGAAAACCCA<br/> CAGAGAGCGTTACCTTTATCAATCATTCTTTCCCTGACAATAATTTGCGT<br/> CTTATATTGTGGAGTGGCAATTGTTTTGACATTAATGTGGCCCTACTATTT<br/> ACAGGACGTTAATGCACCCTTACCATACGTCTTCGGTCAAATCGGCTGG<br/> CCTTGGGTGCAGTGGGTAGTCACAATTGGAGGCATAGTTGGGACCTTTG<br/> CGAGTTTAATAGGATCACTTCTTCCAATCCCTCGCGTAGTATATTCAATGG<br/> CTGATGACGGCTTACTGTTTAAGTTCTTGGCTACTGTACATCCAAAATTT<br/> GGAACCTCTTTTACTGCAACTCTAGTTACGTCAGTCATCGCTGGAGTATT<br/> GGGAGGTATATTCAATCTGAAGCAATTAGTTGACTTGATGTCCATCGGAA</p> |

|        |                                                                                                                                                                                                                                                                                                                                                                                                                                                                                                                                                                                                                                                                                                                                                                                                                                                                                                                                                                                                                                                                                                                                                                                                                                                                                                                                                                                                                                                                                                                                                                                                                                                                                                                                                                              |
|--------|------------------------------------------------------------------------------------------------------------------------------------------------------------------------------------------------------------------------------------------------------------------------------------------------------------------------------------------------------------------------------------------------------------------------------------------------------------------------------------------------------------------------------------------------------------------------------------------------------------------------------------------------------------------------------------------------------------------------------------------------------------------------------------------------------------------------------------------------------------------------------------------------------------------------------------------------------------------------------------------------------------------------------------------------------------------------------------------------------------------------------------------------------------------------------------------------------------------------------------------------------------------------------------------------------------------------------------------------------------------------------------------------------------------------------------------------------------------------------------------------------------------------------------------------------------------------------------------------------------------------------------------------------------------------------------------------------------------------------------------------------------------------------|
|        | <p>CTTTGCTTGCATTTACTTTAGTAGCTGTCTGCGTTCTAATTCTGAGATATC<br/> GGGATGAACCGGATGAAAATTGTATGTTGATTAATTCGGAAATCGGAGA<br/> ATCGTCACGACTGACGCAAGTTTGGCTCGGCGAAAAGACCACCGTCAA<br/> GAAGATTTTCAAACAGCTCTGGAATTGGAACAAACTTACGATTCCCACC<br/> TACTTGTCCAGCGCAATTGTCACTGTTGAAACCATTCTTTTCGTCTCATG<br/> CTCCATCGGACTCGTGTCAATTGGTCAATTATAAAGCATCGCTTGATGCTT<br/> CAAATTTTGCAGTGTATAACCATAATTACTGTTTCCGTTATGATTTTTCTTCT<br/> TATTTCAATAAGTCTTCAGCCTACATCTTTGATTTCTCTTCAGTTAAGGT<br/> TCCTTTTCGTGCCTATTTTACCTGCCATCAGTATTATGTTTAATGTATATTTG<br/> ATGTTGCTCCTCGACTTGGCCACATGGATCAGATTTGTTTCTTGGCTATC<br/> TGTAGGTTTTGTAATTTACTTCTGCTATGGCATAACTCATAGCTCAGAGA<br/> GAAAATCTGCAATCCAGAATCAGCGGGAGTGTAGTGGTGGATATGATAC<br/> TTTGAGCCCTAATATTTCCATAGTGAGGGATCCTATCCTGTAA</p>                                                                                                                                                                                                                                                                                                                                                                                                                                                                                                                                                                                                                                                                                                                                                                                                                                                                                                                                                                                                                        |
| BtAPC4 | <p>ATGAAACATAAATCCGTGATCTCTTCTTGTTCGAATAGCTCCTCGGA<br/> ACTCTCAAACAACAACAACACCACCGCCAGCAACAATAACCTACCGGC<br/> AGGTAATCATGCACAGAACGGGAAGGAAGGAGTCCAGTGGCGGAGCG<br/> GGATGGGGGGCCGGGGCCTGGGGCTGGGCCTGGGGGGCGCGGGGCTCG<br/> GGAGGCGGAGGGAGCGGGGGCGGCGCGGGCGGCTCCGGCGGGGAGGC<br/> GGAAACGGACGACCAAGACGATGGGCCGCGAGGAGACAAGCTGGAGG<br/> GGGCGGACCCAGCTCAGGATGACACTCTTCACCTCCAGAGACGGGTGG<br/> GACTCCTCAGTGGGGTGGCTCTAATCGTCGGAACCATGATTGGTTCCGG<br/> CATTTTTGTTTCCCCGTCAGGCCTGATGGTGCGCACTGGTTCCATTGGCA<br/> TGAGTTTCGTCAATTTGGATCGCATGTGGCGTTGTCTCTTTTTTGGGGCG<br/> CTGGCCTATGCGGAGCTGGGGACGATGAACCCGAGCAACGGGGCCGAG<br/> TACGCTTACTTCATGGACGCGTTCGGCCCGATCCCTGCATTCTCTTCTC<br/> GTGGGTCTCCACGCTGGTGCTCAAGCCCTCGCAGATGTCCATCATCTGT<br/> CTCAGCTTCGCCAAGTACGCCGTCGAGGCCTTCGTGACGAGTGCAGAG<br/> CCCCCAGAGCTCTCCGTCAAACCTCGTCTCCGTCCCTCACAATACTGGTAA<br/> TATTGGTGGTAAACTGCTATAGCGTCAATTTAGCCACCGGTGTGCAGAA<br/> CACGTTTACCGCCGCTAAGTTGTTTGCTATTCTCATCATCATCGTAGGAG<br/> GTTTATATCAGCTTATGAAAGGCAACACGAAAAATTTGGAGAACATGTT<br/> TGAAGGAACAACCTTCATCTGTTGGCAATCTTGCGACGGCATTTTACACG<br/> GGTCTGTGGGCGTATGATGGTTGGAATAACCTGAATTATGTACAGAAAG<br/> AAATTAATCACCATCAAAGAATGTTCCCTCGGTCAATCATGATCAGCATA<br/> CCTCTGGTAACAATCTGTTATGTTTTAATAAACCTCTTATCTGGCTGTG<br/> ATGTCACCTGCTGAAATGGTTGAGTCGGAAGCGGTTCGACAGTACTTTTG<br/> GAAATCGAATCCTTGGGCTAATGGCATGGTTAATGCCGCTGTCAGTGAC<br/> AATATCAACCTTTGGTTCAGCAAACGGAACGTTGTTTGCCGCTGGTCGG<br/> TTGTGTTTTGCAGCGAGTCGTGAAGGACACCTATTAGATATTTTGTGATA<br/> TGTCACGTCAGGCGATTGACTCCTGCTCCGGGGCTAATATTCCAATCA<br/> ATTATTGCCATTGCCATGGTCATGTCGGGTACAATCAACTCACTCATCGA<br/> CTTCTTCAGTTTACGGCGTGGATTTTCTACGGTGGCTCAATGCTTGCTG<br/> TTATTGTGATGCGCTATACTAGACCTAACTTCCCGAGACCCCTACAAAGTT<br/> CCAATTATCATAACCATGGACGGTGCTTTTTGATTTCTCTGTATTTAATAGTA</p> |



|        |                                                                                                                                                                                                                                                                                                                                                                                                                                                                                                                                                                                                                                                                                                                                                                                                                                                                                                                                                                                                                                                                                                                                                                                                                                                                                                                                                                                                                                                                                                                                                                                                                                                                                                                                                                                                                                                                                                                                                                                                                                                                                                                                                                                                                                                                                                        |
|--------|--------------------------------------------------------------------------------------------------------------------------------------------------------------------------------------------------------------------------------------------------------------------------------------------------------------------------------------------------------------------------------------------------------------------------------------------------------------------------------------------------------------------------------------------------------------------------------------------------------------------------------------------------------------------------------------------------------------------------------------------------------------------------------------------------------------------------------------------------------------------------------------------------------------------------------------------------------------------------------------------------------------------------------------------------------------------------------------------------------------------------------------------------------------------------------------------------------------------------------------------------------------------------------------------------------------------------------------------------------------------------------------------------------------------------------------------------------------------------------------------------------------------------------------------------------------------------------------------------------------------------------------------------------------------------------------------------------------------------------------------------------------------------------------------------------------------------------------------------------------------------------------------------------------------------------------------------------------------------------------------------------------------------------------------------------------------------------------------------------------------------------------------------------------------------------------------------------------------------------------------------------------------------------------------------------|
|        | <p>GCTCCTATTATCGACTCTCCGCAGATCGAGTACCTGTATGCATCATTTTTTC<br/> ATCTTTGCAGGCCTTCTAGTCTACGTTCCATTTGTTCACTACAAGGTCAA<br/> CTGCAAATGCATGGAGAAATTCACCGTTTTTTGTCAACTATTACTGGAAG<br/> TTGCGCCGACGAACATCACCTATGATTGA</p>                                                                                                                                                                                                                                                                                                                                                                                                                                                                                                                                                                                                                                                                                                                                                                                                                                                                                                                                                                                                                                                                                                                                                                                                                                                                                                                                                                                                                                                                                                                                                                                                                                                                                                                                                                                                                                                                                                                                                                                                                                                                                         |
| BtAPC5 | <p>ATGAAGATTCCAACGATTCTGGGCCCGGGTTATTCCCGACGGGCGACT<br/> ACAAAAAAGACGGCCTCTCATTATTCGCCAAATTAATTAGGACGAAAAA<br/> TGTGGAAGGAATGGACGGCGAGATTTTCGCTCAAATTAGGACTGAAATC<br/> AAATCGGATAAAAACTTAAATTGAAGAAATGTCTAACAACGTTAGATT<br/> TAACTTCACTCGGTGTCGGCAGTTGTGTTGGCACAGGAATGTATTTAGTT<br/> TCTGGAATGGTCGCAAGAAATTACGCCGGTCCAGGTGTAATAGTTTCGT<br/> TTTTTATAGCAGCCTTGGCTTCCATATTTTCAGGTGCTTGTTACGCTGAGT<br/> TCGGGGTACGAGTTCCGCACACAACAGGCTCGGCATATATGTATAGTTAT<br/> GTAAGTGTAGGTGAATTCATTGCATTTCGTAATTGGTTGGAATATGATATTA<br/> GAGTATTTAATTGGAACCTCAGCATGTGCCTGTGCTTTGAGCGCTTGTTT<br/> TGACGCCCTCACGAGTGGCGCCATTAGTAAAACGGTAGCCAGTGTAACG<br/> GGAACCATATTCGGTTCGCCCTCCCGACTTCCTAGCTAGTATAATAACAGT<br/> CTTGATGACAATTTAATAGCCGCTGGTGTAAAAAAATCACTAGTTTTTA<br/> ATAATGTTCTAAATGCAATCAATTTAGCCGCGTGGGTCTTCATAATGAGC<br/> GCAGGCCTCTTTTACGTCAATACGGACAACCTGGTCCCAGCACAAAGGAT<br/> TCCTTCCCTACGGTTGGTCCGGGGTATTACAGGGCGGGCGACGTGCTT<br/> TTATGCATTCATAGGGTTTGACATAATCGCAACGACGGGCGAGGAGGCG<br/> AACAAACCCTAAGAAATCCATTCTTTAGCAATAGTTAGCAGTTTAGTAAT<br/> AATTCTCATGGCCTACGTCACCTCATCTATGATGCTCACACTAATAGTTCC<br/> CTACGAAGAGGTGGATCAGGACTCAGGGCTGGTCGAGATGTTCCGGTCA<br/> AGTGGGGGCGTACAAGTGCCAATATATCGTCGCCATCGGGGCGCTCGCC<br/> GGGCTCACGGTCAGCATGTTCCGGCTCCATGTTCCCCATGCCCAGAGTAG<br/> TCTACGCCATGGCTCAGGATGGCCTCATTTTCAGGTCTCTGGGTCAAGTT<br/> TTGCCTTTCACCGGCACTCCGGTCTTCGCCACGTTTTGTAGTGGTGCCG<br/> CGGCCGCCATTGCCGCCCTTCTATTAAACTCGAAGTTCTTGTTGAAATG<br/> ATGTCTATAGGTACTTTACTTGCATATACTTTAGTCTCAACATGTGTCCTC<br/> ATCTTGAGGTATCAACCGCACACCACGAACCTCATGGACTTTTACCAG<br/> AGTCTCTCAGGACGCCTCTGAACAGGTCGCCTTCAAAAGAAAATGTTG<br/> GCAACGGCCAGGCGGGAAAATATGGCACAACCTCTGCCAGCAGATAATAT<br/> GAAAACGAGTTACAGCGGTGTCATATCGCAGCAGCCTCCAGTCACAAC<br/> GCTGAATAACCAGCAACATCGAGTGATGGTGCGCAAAGTTACCAGAAG<br/> ATCCGGAAGTAGTTCGCCCGATTCCGGACGACACGTATGCGGGGGAGGA<br/> ATCTGAAGACCTCTCCATGCGCGACGACCAGTTCCTGGTTTCAGATAGA<br/> AACGAGAACAAGTTCTACGGATCCGTTACGCTGGTTCAACCCAAGCC<br/> AGCGCGGGAATCAAACCTCGCTTACGCTATATCAGTCATCGGCTTCAGG<br/> CGGCGACGTACTTGTGCCCGGCGATCTTTCCATGGGTGGACACGGGCC<br/> GGCTACCGAGGAGAGTGGCATGATGGTGATGAAGTACGTGTTGCTCCTA<br/> TACATCCTCATTATCCTCTTCGATCTACTCATCGTTTGTGCCATGGACTCC<br/> ATGGGGACTTTCCTCAAACCTTGACTCTACATCCTGTTTCGCCTCCATCAT<br/> AGCCGTTTTGGCTCTCATCTCGAGAAAACCGCAGAACAGGAAAGCGCT</p> |

|        |                                                                                                                                                                                                                                                                                                                                                                                                                                                                                                                                                                                                                                                                                                                                                                                                                                                                                                                                                                                                                                                                                                                                                                                                                                                                                                                                                                                                                                                                                                                                                                                                                                                                                                                                                         |
|--------|---------------------------------------------------------------------------------------------------------------------------------------------------------------------------------------------------------------------------------------------------------------------------------------------------------------------------------------------------------------------------------------------------------------------------------------------------------------------------------------------------------------------------------------------------------------------------------------------------------------------------------------------------------------------------------------------------------------------------------------------------------------------------------------------------------------------------------------------------------------------------------------------------------------------------------------------------------------------------------------------------------------------------------------------------------------------------------------------------------------------------------------------------------------------------------------------------------------------------------------------------------------------------------------------------------------------------------------------------------------------------------------------------------------------------------------------------------------------------------------------------------------------------------------------------------------------------------------------------------------------------------------------------------------------------------------------------------------------------------------------------------|
|        | <p>ACTCTTCATGACTCCGTGCGTCCCTTTTGTTCCTGGGATTGCAGTGGCGG<br/> TCAACATATACCTCATCTTCAAACCTCCGTTCTGACCCTTGTTGATT<br/> ACGGTCTGGATGACGATAGGCTTTGGCGTGTACTTCTACTACGGCATAA<br/> AGCACAGCTCCTTGGAGCACGAACCGGACGATGAGGACGGGCTCAGA<br/> GGGGCGGAAGGCGGTCAGCAGAATATCGAAATGAAGCCGCCTCTGAGC<br/> AAGGCGACGAGCCCCGCCCGCAACCGGTTTCGGCGCCCCACAAGCAG<br/> GAGGTGAAACCCGAGCCCGCCAGGCGCCACCTCCAGGGCGCCA<br/> CCGCTCAGCCAACGATCCGAGAGCCTCTTCGTCCCACCCACGGAATTCC<br/> CGACGTGGGACGACTAA</p>                                                                                                                                                                                                                                                                                                                                                                                                                                                                                                                                                                                                                                                                                                                                                                                                                                                                                                                                                                                                                                                                                                                                                                                                                                                                                    |
| BtAPC6 | <p>ATGGCCGAGCCCGGGGCTGCGGGGGCGGGGACGCTGAACGCGCCCTCC<br/> TCGTCCGGCGGAAGCGCGGGGGTTCGGGGTGGACGGGCCGGTGGAGCT<br/> GAAGAAGGAGATCGGGCTCCTGGACGGCGTGGCCATCATCGTCCGGGT<br/> CATCGTCCGGGGCCGGGATCTTCGTCTCCCCAAGGGGGTTCATCGAGAAC<br/> GCCGGTCCGCCGGCTCGGACTCATCGTCTGGTTCCTGTCCGGAGGCT<br/> TGTCCATGATCGGGGCCTTGTGCTACGCCGAGCTCGGAACGATGATCCC<br/> AAAATCTGGCGGTGATTACGCGTATATCAACGAGGCTTTCGGTCCATTGC<br/> CAGCGTTCCTCTTTCTTTGGGTGGCGTTGATGGTGATACTACCATCCAGC<br/> AACGCTATCACGGCTCTCACATTTGCTCAATACATTCTGCAACCGATTTG<br/> GCCTGACTGCGAACCGCCCTACCTGGCGGTCAGACTCATCGCTGCCGTA<br/> GTTGTCTGTTTATTGACTGCCATTAATTGTTACAATGTCAAATGGGTCAC<br/> CAAGGTTCAAAACGTTTTTACGTTGACCAAAAATTTTTGCTCTGATGACC<br/> ATTATCCTCTCGGGTCTTTGGCTCGTTGTGAATGGAAAAACGGAGAAGA<br/> TTTCGCGACCGTTCGAGGGAAGCAACTATGATCCTGGTCATTTGGCTTTA<br/> TCCGTTTACTCTGGTCTATTTTCCTTCGCTGGCTGGAATTATTTGAATTC<br/> GTGACGGAGGAGCTCAAGAACCCTTATGAAAACCTGCCTAAAGCGATC<br/> TGCATATCTCTGCCGCTGGTCACTGTCGTCTATTTATTTACAAATGTAGCA<br/> TATTTTGTAGCGCTGACAAAAGATGAAATTCTAAAATCCAGCGCAGTTG<br/> CTGTGACATTTGCAAATAGACTCTTCGGTCCGATGGCCTGGGTTATGCCA<br/> CTGTTTGTGGCGTGCTCGACTTTTGGAGGTCTGAACGGCGCCATTTTGT<br/> CATCCGCTAGATTGTTCTTCGTCCGTGCTAGGAATGGACATTTGCCGAAG<br/> GCTATAGCCTTAATTAACGTTAAGCACAGCACACCTGTTCCATCCTTGAT<br/> ATTCATGTGCAGTGTGACCTTATGTCAAATGCTGATCAAAGACATATACT<br/> CTCTGATCACGTATACAGTCTTTGTAGAGGCATTACTAACCCCTTTTCTCTA<br/> TTACGGGTCTTCTTTGGCTCCGAGTAAAGAGACCAAATGCACAAAGGCC<br/> GATCAAGGTGAACATAATATTGCCGTTGATTTTCTTCGTAATTTGCTCATT<br/> TTTGGTTGACTACCAATTTTCGTAACCTCAGTAGAGGTTGGAGTAGGA<br/> CTTGCCTTATCTTTTCTGGCATTCCAATATACTTAATTTTATTTACTGGG<br/> AACAAAACCATCATGGTTCAGGTATATTATAGATAACTTCAACCTGACA<br/> TGCGCCAAGTTGTTCCGATGTGTTTTGGAAGACACTGTGGTGGAAACA<br/> GAAACTAAAGTTTCGTGA</p> |
| BtAPC7 | <p>ATGACCACCCCGAAAGACGGGAAATTTCGAGTTGAAGAAATTCCTCAAG<br/> AATCTTTGTCCAGAAGAATGTTCTCGATGTGAGGACGGAAAAAGCAGG<br/> CTGAACTCCGAGAGCAGCAACATGTACATCGAAGTATTCAGTGGCAA<br/> AAGGCCGAAGAAGGAAAACCGGCCAAAGGCGTCCAACCTCAGAGGGA</p>                                                                                                                                                                                                                                                                                                                                                                                                                                                                                                                                                                                                                                                                                                                                                                                                                                                                                                                                                                                                                                                                                                                                                                                                                                                                                                                                                                                                                                                                                                                                |

|        |                                                                                                                                                                                                                                                                                                                                                                                                                                                                                                                                                                                                                                                                                                                                                                                                                                                                                                                                                                                                                                                                                                                                                                                                                                                                                                                                                                                                                                                                                                                                                                                                                                                                                                                                                                                                                                                                                                                                      |
|--------|--------------------------------------------------------------------------------------------------------------------------------------------------------------------------------------------------------------------------------------------------------------------------------------------------------------------------------------------------------------------------------------------------------------------------------------------------------------------------------------------------------------------------------------------------------------------------------------------------------------------------------------------------------------------------------------------------------------------------------------------------------------------------------------------------------------------------------------------------------------------------------------------------------------------------------------------------------------------------------------------------------------------------------------------------------------------------------------------------------------------------------------------------------------------------------------------------------------------------------------------------------------------------------------------------------------------------------------------------------------------------------------------------------------------------------------------------------------------------------------------------------------------------------------------------------------------------------------------------------------------------------------------------------------------------------------------------------------------------------------------------------------------------------------------------------------------------------------------------------------------------------------------------------------------------------------|
|        | <p>GCTGGGGCTAATGAGCGCTGTGAATTTGATTCTCAGTGTCATGATTGGTT<br/> CTGGAATTTTTGTCTCTCCAACACGAGCTCTGAAGGAGGCCGGATCCAT<br/> CGGAATGGCCCTCATTGTTTGGGCTCTATGTGGAACCATCTCCATGCTAG<br/> GTGCGTTGTCTTATGCTGAGCTTGGCACTGTTGTTAACAAATCCGGAGC<br/> TGAGTACTCTTACTATCGAGAAGCATTGGACCCCTCCACAAATTTGGG<br/> GACCACTTCCTAGTTTCATCAATTGTTGGGTTTCAATCGTATTTGTCCGC<br/> CCTGCAGAGATTGCTATAATCATCCTGACTTTTGCGGAATACTTTACTCA<br/> ATTACTTAACCCCATATCCCACCAAATGAAATTGATAATTACTATGATAG<br/> AAAGAAGATAGTCGCCATCGCAGCTCTTTTTATTATCACAGCAATCAACT<br/> TCTTTAGTGTCAAACCTGTATGTTAAGATTGAGAATATTTCTCATCATTCA<br/> AAGTTGCTGCTTGCTTCCCTGTATAGGCTGTGGTCTCTACTACATTTTC<br/> ATTGGGAAAACCTCAAACCTTGAAAATCCATTCAAAGGATCAGATTTAT<br/> CGCCAAGAGCTTTTGCAGTGGCATTTTACCATGGTCTTTGGGCTTATGAT<br/> GGCTGGTCCCTCAGTGACTACTGTCACAGAAGAAATTAAGAAACCTAATA<br/> AAAACATCCCCAGAGCAGTCATAATTGCTGTGCCTTTGGTCACAATGTT<br/> GACTGTTTCATGAATGTCTCTTACATGACAGTTCTGAGCGTTCCGGAGT<br/> TGATTCAAGCCAAAGCTGTTGCCAACGAAGTCGGTGTGAAAGTTTTGG<br/> GTCATTTCTCCTGTTAATCCCAATGGGTGTTGCACTTTCAACGTTTGGT<br/> TGTGCTCTTAGCGTGCAATTTGGAGTAACCAGATTATGTTACTCAGCAGC<br/> TAAAAACGGACACATGATGGAAATATTTTCTATGTTCACTCGAAAAGA<br/> CTTACCCAGCTCCAGCTGTGCTTTTGCAGGGTGTCTGTGTCTGGTGT<br/> GCATTTTGGCTGGAGATATAATTACCCTAATTGAATTCGCCAGTTTCCTTG<br/> TCTGGACATTCTATGGTCTTGCCATGGTCGCCTTAATTGTTATGAGATACA<br/> CGAAAAAAGATGTTCTTAGACCATGGAAAGTACCAATTGTTATTCCTATT<br/> TTGTTATGATCATCGCCTCATGTTTGGCAATTATTCCAATTGCAATGAAG<br/> CCTCAACCTCAGTACCTGATAGCCGTTGGATTCTTATTTCTGGATTTGTT<br/> GTCTACATTCCTTTCAATTTACTTCCAGAAGAAATTATTGGCGCAGATATG<br/> TTCACGAAAGCAGTCAAGTCAGTGATGAACGTTCAACCTCCTGACCAA<br/> GATCAAGAACTCATCGCCAAAAAGACAGCCCAGCTTAATGATGATCAGT<br/> CTGATCCAAAAGAGGCTCTGTGTGTTGTTTCTTCTGTGACGAAACCAA<br/> AGACGATTCGTGTTGCGATGAGCCTTGCTGTGACGACTCATGTCACAAA<br/> AAATCGTGTTGTGACAAATCGTGCCTTGAAAAATCGTGTTGTAACGAAT<br/> CGTGTCTCGAAAATCGTGTGTAACGAATCGTGTCTCGAAAATCGTG<br/> TTGTGACGAATCGTGTCCACGTCAATAA</p> |
| BtAPC8 | <p>ATGCCGGGCTCTAGGCATAAAATAATTGGACATGTTTTTCAGCGGAATTTG<br/> CACAAAGATGAACCGAACCAAACAATTGAGCTCCGGTGAGGAGGTGAT<br/> GGATACACCTCTTAAGAGATGTCTCAACACTTTCGATATCACTCTTTTAG<br/> GTGTCGGGCATATGATTGGTGCAGGAATATACTGTGCTAACAGGAACAGT<br/> GGCCCGAGATCTGGCCGACCAGGAATTATTCTCTCGTTCATTTTAGCCG<br/> GCATAACCTCAATTTGGCTGCTTTGTGCTACGCCGAATTCGGCGCACG<br/> GGTGCCTAAAGCTGGCTCGGCGTACGTTTACACCTATATCAGCGTCGGA<br/> GAGTTCTGGGCCTTCGTCAATTGGCTGGAATATCATTCTCGAGCATATGAT<br/> TGGAGCTGCGTCTGTGGCCCGCCTTGGAGTGGCTACGTAGACTCACTT<br/> TTGAGTGGGAGCATAAGTGCAGCCACGGTGGCTTCGATCGGCCAACTG</p>                                                                                                                                                                                                                                                                                                                                                                                                                                                                                                                                                                                                                                                                                                                                                                                                                                                                                                                                                                                                                                                                                                                                                                                                                                                                                                                                                            |

|        |                                                                                                                                                                                                                                                                                                                                                                                                                                                                                                                                                                                                                                                                                                                                                                                                                                                                                                                                                                                                                                                                                                                                                                                                                                                                                                                                                                                                                                                                                                                                                                                                                                                                                      |
|--------|--------------------------------------------------------------------------------------------------------------------------------------------------------------------------------------------------------------------------------------------------------------------------------------------------------------------------------------------------------------------------------------------------------------------------------------------------------------------------------------------------------------------------------------------------------------------------------------------------------------------------------------------------------------------------------------------------------------------------------------------------------------------------------------------------------------------------------------------------------------------------------------------------------------------------------------------------------------------------------------------------------------------------------------------------------------------------------------------------------------------------------------------------------------------------------------------------------------------------------------------------------------------------------------------------------------------------------------------------------------------------------------------------------------------------------------------------------------------------------------------------------------------------------------------------------------------------------------------------------------------------------------------------------------------------------------|
|        | <p>CACGAAAAATGGTTGGGTGCTATCCAGACTTACTCGCCTTCATGGTCT<br/> GCATATCATA CGCTCTTTTACTAGGTATCGGAGTGAAGAGTTCAGCGGTG<br/> GTGAACAGCCTGCTGACGCTGGTGAACCTGAGCGTGATGGGGCTGGTG<br/> ATCGTGATCGGTTTCTGGTACGGGAAGCTGGAGAACTGGAACGCCAAC<br/> AACCGGGGGTTCCTCCCGTACGGGTTCCTCGGGGGTGTTCGCAGGGGCC<br/> GCCACCTGCTTCTACGCTACGTCGGCTTCGACAGCATCGCCACCTCCG<br/> GCGAGGAGGCCAGGACCCCTCCTTCTCCATCCCGGTCGCCACCGCACT<br/> CTCCATGACACTTGT CAGCTTCGGGTACATTCTAGTGAGTGCAGCGTTG<br/> ACCCTCATGGTTCCGTACACTATGATCGATGCCAGCGCAGCCCTTCCCGA<br/> GGCATTCTCCATGATGGGTCTACATTGGGTCAAGTACGCAGTAACGATTG<br/> GGCACTCTGTGGTATGACGACCCTTACTTGGCTCCCTCTTCTCTCTC<br/> CCGCGATGCATGTATGCCATGGCACAAGATGGACTCATCTTCGCCTTCCT<br/> TGGCAAGATCAATAAAACCACACAGGTTCTGTGTAAATCTCATCATAT<br/> CAGGATTGATGAGCGCCACGATTGCACTCTTATTGATCTAGAAAACT<br/> GGTGGAGTTCATGTCGATCGGAACATTGTTGGCGTACACCATCGTTAGC<br/> GCCTCGGTGATAGTTCTTAGATACCGTCCGAACACACCGCCTCCTTCTAA<br/> TGATAACGTCAGCGTTAATGACGTCTACATAATGTCACCCTCTCCTGGGG<br/> TGGAGGAGTTC AAGGTTTGCATGGGTGGACGCCTGAAGCCCAGCTTCG<br/> ATTGGCTGGAGCCGGTAGTGGGTGGTGCAAACCTGGCGAAGCTGTGT<br/> CTGTTGCCGTTTT CATTTCACCTGCTTCAGCGCCCTGCTCTGCTTCCAC<br/> TTTCATTGGGCCACCGCTCAAATGGAGAATGGCGCGTGGTGGACCGTTT<br/> TCGGCTGCGTCTTCTGATTGCCGTCATGCTCTTCTGTTTACTAGTGATA<br/> GAGGCTCATGAGCAGAATAGAACC GGGCTGACGTT CATGGTGCCCTAG<br/> TTCCTTACGTACCCGCTTTGAGCATTCTTTTCAACGTGGAGCTCATGGCA<br/> AACCTGAACATCTTAACTTGGCTCCGGTTCATGATCTGGATGATTTTAGG<br/> GTTACTGGTTTACTTTTTATATGGTATCCACCACAGCAAGGAAAATGATA<br/> CCACTTCCTTACTCGGTGCTCATGACGTCATCAGAGGCGACGAAATC<br/> AAAATGGGGCTCGATTCTGCTCCGGTCACAATTCCTGTCACGAGGAAA<br/> AGAAGGTCCGGGAAGGGAGATCGCCAGGCTATCGTCAATAGCGACGAC<br/> GATACTGACAGCTCGGACTAA</p> |
| BtAPC9 | <p>ATGACGTTTATGCGAGGTGTGATCGGGACTTTAACCCGAATCAAAGTTT<br/> CGGATGAGGATATAGTGGACAGCGACGCGCCGAAGTTGGCCCGTGTCTT<br/> TGACCTGTTGACCTGACGTTGCTCGGAGTTGGGACCACACTCGGGGT<br/> GGGCACCTACGTGCTTCCGGGTGCCGTCGCCAAAAACACCGCCGGTCC<br/> CGCTGTCACCGTTTGCTTCGCCATTGCTGCCGTTGTCTCATTGTTGGCTG<br/> CTTTATGTTATGCTGAATTTGCTGCCAGGGTACCGAAAGCGGGATCAGCT<br/> TACGTCTACTGTTACGTCACAGTCGGCGAGTTTTGTGCATT CATAATAGG<br/> ATGGAATTTGCTGCTTGAGTTTGT CATTGGTACAGCAAGTGTAGCGAAA<br/> GCGTTCACCGGCTATGTCGATGCACTTTTTGGGGGTGGCTACGCTTCCAT<br/> GATGCAAAGTGTCATGCCGATGCATGTTTCCTTCTAGCCCAATATCCAG<br/> ATCTCATGGCTCTGTGCGTCGTCCTATTGTTTTCACTTTTGTGGCCTGG<br/> GGTGTCAAAGAATCTACATTCATTAACAACATCTTCACGACCGTAAACTT<br/> GGTAACGGTTGTCATCGTAATTTTCGCCGGGATTATGTTTCCAAAATGA<br/> GCAACTGGTTCATTGACCCGGCGATGATCCCTCCGGAGCATAAGGCAGC</p>                                                                                                                                                                                                                                                                                                                                                                                                                                                                                                                                                                                                                                                                                                                                                                                                                                                                              |

|         |                                                                                                                                                                                                                                                                                                                                                                                                                                                                                                                                                                                                                                                                                                                                                                                                                                                                                                                                                                                                                                                                                                                                                                                                                                                                                                                                                 |
|---------|-------------------------------------------------------------------------------------------------------------------------------------------------------------------------------------------------------------------------------------------------------------------------------------------------------------------------------------------------------------------------------------------------------------------------------------------------------------------------------------------------------------------------------------------------------------------------------------------------------------------------------------------------------------------------------------------------------------------------------------------------------------------------------------------------------------------------------------------------------------------------------------------------------------------------------------------------------------------------------------------------------------------------------------------------------------------------------------------------------------------------------------------------------------------------------------------------------------------------------------------------------------------------------------------------------------------------------------------------|
|         | <p>GGCCGGGAAAGGAGGTTTCATGCCTTACGGCTGGTCGGGAGTCTTGGC<br/> TGGGGCCGCTACCTGCTTCTATTCTTTTGGCGGATTGCGACTCCATTTGCA<br/> CAACGGGCGAGGAGGCCAAAAATCCACAAAGAACCATCCCTTTGGCTA<br/> TTGTTATGACACTTGCGATTGTGTTTCGTTGCCTACTTTGGTGTATCCTCCG<br/> TTATCACGATGGCGTGGCCTTATTATGACCAGCATATTGACGCTCCATTCC<br/> CATATGTATTTGACAAGACAGGACTGCACGCTATAAAGTGGATTGTAAC<br/> AGTCGGCGCTTTGTTTGTCTGTGTACCAGTATGCTGGGAGTTGCTTTTC<br/> CTCTGCCCAGAATCCTATACGCCATGTCATCAGATGGTTAATTTACAAG<br/> TTCTTTTCCCGTATAAATGCGTACACACAGACTCCTGTGTTAGCAACTTT<br/> AATATCTGGTCTTTTAGCTGGTATTATGGCAGCAATGTTGACCTGACAC<br/> AGCTAATCGATATGATGTCAATTGGTACTCTGATGGCTTATTCAATTGTTG<br/> CTCTGTGTGTGATTTTACTGAGGTACAAAGAGGACGAATCTAGTGTGGA<br/> GGACGTCAGTAAAAAGCAAAACGATTTTGGGTCAAATAAAACAGAGCA<br/> GTACACTTTCAGCTCTGTCTTAAGTATATTAAGCACAGAAAAAGAGAGC<br/> TCACCTACCGCAAGAACAGTATTCATTGCGAGGATAAGCACAACTATATT<br/> CTGTGCTGTACGATAATTCAGACGCTAATCCTTGTTCTCAGCGAATCAA<br/> TATTTTCGGCTGAATCATTTTGGAGTGTCTTGAGCACTCTCGTCGTTTAA<br/> GCTAATTTTGTAAATTTAGGAGCGACCATGTATGTCATTTTCGTTGCAACC<br/> ACAATCGGATACAACCTACCTCAAATTCAGGGTTCCTGGAGTGCCTGTG<br/> GTGCCATGCTGCTGTATATTTATGAATACATATCTTATGGCCAACTCGAT<br/> TTTCACACGTGGGTCCGATTCCCGGTGTGGTTGGCTGTTGGTTTTGTGAT<br/> CTACTTCACCTACGGAATCCAGCACAGCGTGCAAGGTATCCTCGATCGT<br/> CAACAGGCGAAACAGGAACTGAAATCGCAGCCACCCCCTCCCGCCAG<br/> ATGTACAAATGA</p> |
| BtAPC10 | <p>ATGTTCCCCCGAATGTTAAGGTGCTACTAACAATAATTCGCCTCGGTTGT<br/> TACGCGGCTGAAATCGGAAGACTCAGTGGATCTAGAATCAAACAAGCC<br/> GAAGCCGAAGTTGGCGAGAGTGCTAACCGTTCCTTGATCTGACAGCGTT<br/> GGGAATCGGGTCAACTCTCGGTGTTGGTTCCTACGTCTTACCGGGAGAA<br/> GTCGCTCGCAATACAGCTGGACCTGCTGTCACTGTCTCTTTCTTCATTGC<br/> TGCTGTTGTCTCCATTCTTGCCGCTCTTTGTTATGCCGAGTTTGCAGCTC<br/> GAGTTCCTAAAGCAGGATCAGCATAACGTTTACAGTTATATGACTGTCCGG<br/> GAGTTCCTGCGCTTTCGTCATAGGCTGGAATCTCATCTTAGAATATGTCAT<br/> CGGGACGGCCAGTGTGCAAAGGCACTGTCCGGATACCTGGATGCCCT<br/> GACAGGAAAAGTGTTTCGAAACGTACATGTTGCAACATTATCCGATGAAT<br/> GTCAGTTTTCTCGGTCTTATCCAGATTTGATCTCATTCTCCGTCATCATG<br/> CTACTTTCATTTGTGCTAGCATGGGGCGTTAAGGAATCAACAATGCTCAA<br/> TAATATTTTTACTGCTTTGAACCTAACCACGGTTGGCATCATAATTATTGC<br/> TGGGATAACAGTCGCCAAGCCTTCCAACCTGGTTCATCGCGAAAGAAGAT<br/> TTACCCGTGGACCCAACTCAAATAACAACCAGGAGAAGGAGGTTTC<br/> ATGCCGTTTGGCTGGACTGGTGTCTTAGTTGGAGCAGCTACTTGTTTCTA<br/> CTCTTTTCATTGGGTTGACTGCATAGCAACAACAGGGGAAGAGGCGAA<br/> AAACCCCAAAAAGACTATTCTCTGGCCATCGTTTTGTCTCTGTTGATAA<br/> TTTTCTGCGTGTATTTTGGAAATATCTGCAGTTCTCACCATGATGTGGCCTT<br/> ATTATGACCAGGATCCAGCGGCTCCATTCCCTTCAGTGTTGAGAAAGT</p>                                                                                                                                                                                          |

|         |                                                                                                                                                                                                                                                                                                                                                                                                                                                                                                                                                                                                                                                                                                                                                                                                                                                                                                                                                                                                                                                                                                                                                                                                                                                                                                                                                                                                                                                                                                  |
|---------|--------------------------------------------------------------------------------------------------------------------------------------------------------------------------------------------------------------------------------------------------------------------------------------------------------------------------------------------------------------------------------------------------------------------------------------------------------------------------------------------------------------------------------------------------------------------------------------------------------------------------------------------------------------------------------------------------------------------------------------------------------------------------------------------------------------------------------------------------------------------------------------------------------------------------------------------------------------------------------------------------------------------------------------------------------------------------------------------------------------------------------------------------------------------------------------------------------------------------------------------------------------------------------------------------------------------------------------------------------------------------------------------------------------------------------------------------------------------------------------------------|
|         | <p>TGGGATGCCTCAGGTAAATGGATAGTCTCCGTGGGGGCCGTTTTTGCT<br/> CTGTGCACCAGTTTGTCTGGGGTCAATGTTCCCGATGGCGCGGATTTATA<br/> CGCGATGGCTGAGGATGGTCTCATCTACACATTTTTGGCGCAAATCAAC<br/> AAAAAAACACTTACGCCATTGTTTCGCCACATTCGTGTCAGGAGTTTTGG<br/> CAGGAATAATATCGGCTATTTTTAACCTAACGCAGCTAATCGACATGATG<br/> TCCATCGGCACCCCTCCTCGCTTACTCCATCGTTTCATTGTGCATTTTGCTT<br/> TTAAGGTACCGAAAATACGAGATCAGCGAGGAAACGAAACCAGGCCGT<br/> AATGAGCCTGCAGTCAATCATGAAGAACCAAAGAAAGAATATCCAGGC<br/> TTCATTTCCGGATTGTTGAACCTTGAAAATGAACGGCGGGCCACGGATT<br/> TCTCGGAGGCGATCTCGAAGATTTTAATTGGCACTTTTTGTATTTTATGTT<br/> TCATGCATGTAGGAGGTCTAATTTTGATGGAACGAAGAATGCGATTCTGA<br/> AATCAACTTTTGGTTCAAAGCATACCTCATTGGTGTAGGAATTTACTTG<br/> TGATCAGCGTGATTCTCCTATGGCGACAGCCTCAGGCAAACACAGAAAA<br/> ACTAACTTTTACAGCTCCATTGATGCCAATTGTACCTACTTTAAGTATTTA<br/> CGTGAACACATACCTAATGTCAAAGCTGGATAAAGCAACATGGATCAGA<br/> TTTGTGTCTGGCTTTTATTAGGTCTCTTAGTCTATATGTGTTATGGGCTC<br/> AGGCACAGCAAGGAAGGAAAGAATAGATTTATTGCAGCTGAAAAGAAG<br/> GAAAAGATCTCAAAAAGTTAG</p>                                                                                                                                                                                                                                                                                                                                                                                                                                                                                      |
| BtAPC11 | <p>ATGTACATCGAAGTATTCAGTGGCAAAAAGGCCGAAGAAGGAAAACCG<br/> GCCAAAGGCGTCCAACCTCAGAGGGAGCTGGGGCTAATGAGCGCTGTG<br/> AATTTGATTCTCAGTGTTCATGATTGGTTCTGGAATTTTTGTCTCTCCAAC<br/> ACGAGCTCTGAAGGAGGCCGGATCCATCGGAATGGCCCTCATTGTTTGG<br/> GCTCTATGTGGAACCATCTCCATGCTAGGTGCGTTGTCTTATGCTGAGCT<br/> TGGCACTGTTGTTAACAAATCCGGAGCTGAGTACTCTTACTATCGAGAA<br/> GCATTTGGACCCCTCCACAAATTTGGGGACCACTCCTAGTTTCATCAA<br/> TTGTTGGGTTTCAATCGTATTTGTCCGCCCTGCAGAGATTGCTATAATCAT<br/> CCTGACTTTTGCGGAATACTTTACTCAATTACTTAACCCATTATCCCACC<br/> AAATGAAATTGATAATTACTATGATAGAAAGAAGATAGTCGCCATCGCAG<br/> CTCTTTTTATTATCACAGCAATCAACTTCTTTAGTGTCAAAGTGTATGTTA<br/> AGATTGAGAATATTTCTCATCATTCAAAGTTGCTGCTTGTCTCCTTGTC<br/> TAGGCTGTGGTCTCTACTACATTTTCATTGGGAAAACCTCAAACCTTGA<br/> AAATCCATTCAAAGGATCAGATTTATCGCCAAGAGCTTTTGCAGTGGCAT<br/> TTACCATGGTCTTTGGGCTTATGATGGCTGGTCCTCAGTGACTACTGTC<br/> ACAGAAGAAATTAAGAAACCTAATAAAAACATCCCCAGAGCAGTCATA<br/> ATTGCTGTGCCTTTGGTCACAATGTTGTACTGTTTCATGAATGTCTCTTAC<br/> ATGACAGTTCTGAGCGTTCCGGAGTTGATTCAAGCCAAAGCTGTTGCCA<br/> ACGAAGTCGGTGTGAAAGTTTTGGGTCAATTTCTCCTGTTAATCCCAATG<br/> GGTGTGCACTTTCAACGTTTGGTGTGCTCTTAGCGTGCAATTTGGAGT<br/> AACCAGATTATGTTACTCAGCAGCTAAAAACGGACACATGATGGAATA<br/> TTTTCTATGTTCACTCGAAAAGACTTACCCAGCTCCAGCTGTGCTTTT<br/> GCAGGGTGTCTGTGTCTGGTGTGCATTTTGGCTGGAGATATAATTACCC<br/> TAATTGAATTCGCCAGTTTCTCGTCTGGACATTCTATGGTCTTGCCATG<br/> GTCGCCTTAATTGTTATGAGATACACGAAAAAAGATGTTTCTAGACCATG<br/> GAAAGTACCAATTGTTATTCCTATTTTTGTTATGATCATCGCCTCATGTTT</p> |

|         |                                                                                                                                                                                                                                                                                                                                                                                                                                                                                                                                                                                                                                                                                                                                                                                                                                                                                                                                                                                                                                                                                                                                                                                                                                                                                                                                                                                                                                                                                                                                                                                                                                                                                                         |
|---------|---------------------------------------------------------------------------------------------------------------------------------------------------------------------------------------------------------------------------------------------------------------------------------------------------------------------------------------------------------------------------------------------------------------------------------------------------------------------------------------------------------------------------------------------------------------------------------------------------------------------------------------------------------------------------------------------------------------------------------------------------------------------------------------------------------------------------------------------------------------------------------------------------------------------------------------------------------------------------------------------------------------------------------------------------------------------------------------------------------------------------------------------------------------------------------------------------------------------------------------------------------------------------------------------------------------------------------------------------------------------------------------------------------------------------------------------------------------------------------------------------------------------------------------------------------------------------------------------------------------------------------------------------------------------------------------------------------|
|         | GGCAATTATTCCAATTGCAATGAAGCCTCAACCTCAGTACCTGATAGCCG<br>TTGGATTCCTTATTTCTGGATTTGTTGTCTACATTCCTTTCACTTACTTCCA<br>GAAGAAATTATTCGGCGCAGATATGTTACGAAAGCAGTCAAGTCAGTG<br>ATGAACGTTCAACCTCCTGACCAAGATCAAGAAGTCAATCGCCAAAAAG<br>ACAGCCCAGCTTAATGATGATCAGTCTGATCCAAAAGAGGCTCTGTGTG<br>TTGTTTCTCTTCTGTCAGAAACCAAAGACGATTCGTGTTGCGATGAGCC<br>TTGCTGTGACGACTCATGTCACAAAAAATCGTGTTGTGACAAATCGTGC<br>CTTGAAAAATCGTGTTGTAACGAATCGTGTCTCGAAAAATCGTGTTGTA<br>ACGAATCGTGTCTCGAAAAATCGTGTTGTGACGAATCGTGTCCACGTCA<br>ATAA                                                                                                                                                                                                                                                                                                                                                                                                                                                                                                                                                                                                                                                                                                                                                                                                                                                                                                                                                                                                                                                                                                                                                                                                    |
| BtAPC12 | ATGACGTCCCGCAACGCGACGGACGTGAAGGCGAAGCTGCCCGTGGAG<br>GTGGACGACGAGAAGGTCCAGCTGAAGCGGAAGATCACGCTGCCCAA<br>CGGAGTGGCCCTCATCGTCGGCACCATCATCGGCTCCGGCATCTTCGTG<br>TCCCCACCGGCGTCTTCCAATATAACGGGTCAGTGGGCTCGTCGCTGG<br>TGATCTGGACGCTATGCGGGATCTTCTCGACGATCGGGGCCCTGTGCTA<br>CGCGGAGCTCGGGACTTGCATCTCGCGCTCGGGCGGCGACTACGCCAC<br>ATCCTCGAGGCGTTCGGCCCCGCTGCCGGCCTTCCTCCGCCTATGGTCGG<br>CCCTCCTCATCATCCGGCCCCACCACCAGGCCATCGTCGCCATCACCTTC<br>GCCAGTACGCCGCCAAACCTTCTTCCCAGGGGACTGCAAACCCCCG<br>GAGCAGGCCGTCACCATCTAGCTGCCGTCTGCCTTTGTCTCCTGACCT<br>CCATCAACTGTCTTAGCGTGCGATGGTCCATGCAAGTTCAAAGCGTCTT<br>CACCACCGCGAAACTCTTCGCCCTGGCTGCCATCGTTTTCTTCGGCGTT<br>GGTCACATCCTGCTCGGTAACACGGAAAACCTTCGATCATGCCTTCGACG<br>GGGATTACAACCCAGCCAACATCGCACTCGCCTTTTACTCGGGTCTCTT<br>CGCGTTTGGCGGATGGAACATCTTAATTTGTTGTGGACGAGCTACAA<br>GATCCTTTCAAGAATCTACCGCGAGCTATATGGATAGCGATGCCGATCGT<br>AACAAATTGTGTATGTGACAGCAAATCTGGCCTACTTTGCCGTGGTCCCT<br>GCTCATGAAATGCTCACCTCGCCAGCTGTTGCAGTCTCATTTGGGGACC<br>GTATGTTTCGGACAAGCACGCTGGGCTGTCCCTGTTTTTGTGGCCTTGT<br>AACATTTGGAGGAGTGAATGGTATTTTGTTCACATCAGCTCGTCTGTTTG<br>TCACTGGTGCTCAAGAGGGACATCTTCCCTCCAATATTCTCCTTCATACAC<br>GTAAAAAGATGCACTCCAATTCCTTCCCTTCTCTTCACATGTTTTATGTCT<br>CTCTTAATGTTGTGTTCTACCAATGATTTGTTCTGATCAACTACTTCAGT<br>CAAGTTTTGTGGCTGTCAGTTGGAGTATGCATAGCAGGTCTCTTGTA<br>GCGCCACACCAAACCTGACATGCCACGCCCCATCAGAGTGCACACAGC<br>TCTACCCATTATGTTCCCTCATTTGCTGTGTCTTCTTGGTGTCTGTGCCTGT<br>CGTGGCAGAGCCATTTAACACAATCGTTGGATTACTTATAATTCTCTCTG<br>GAGTGCCTGTGTA<br>CTACTACATTGGTATCAAATGGAAGACAAAACCATTCGC<br>ATTGAAATCAGCACACAATGACTTCACTGTTTTCTTACAAAAAGCACTAT<br>TCGTGCTGAGCCCAGAAGAGTCAGAAAATCCTGTCAGTCTCTTGTGTAC<br>TACATTGGTATCAAATGGAAGACAAAACCATTTGCATTGA |
| BtAPC13 | ATGTTCCCCCGAATGTTAAGGTGCTACTAACAAAATTCGCCTCGGTTGT<br>TACGCGGCTGAAATCGGAAGACTCAGTGGATCTAGAATCAAACAAGCC<br>GAAACCGAAGTTGGCGAGAGTGCTGACCGTTCTTGATCTGACAGCGTT                                                                                                                                                                                                                                                                                                                                                                                                                                                                                                                                                                                                                                                                                                                                                                                                                                                                                                                                                                                                                                                                                                                                                                                                                                                                                                                                                                                                                                                                                                                                               |

|         |                                                                                                                                                                                                                                                                                                                                                                                                                                                                                                                                                                                                                                                                                                                                                                                                                                                                                                                                                                                                                                                                                                                                                                                                                                                                                                                                                                                                                                                                                                                                                                                                                                                                                                                                                                                                                                                                                                                                                                                                                                                                                         |
|---------|-----------------------------------------------------------------------------------------------------------------------------------------------------------------------------------------------------------------------------------------------------------------------------------------------------------------------------------------------------------------------------------------------------------------------------------------------------------------------------------------------------------------------------------------------------------------------------------------------------------------------------------------------------------------------------------------------------------------------------------------------------------------------------------------------------------------------------------------------------------------------------------------------------------------------------------------------------------------------------------------------------------------------------------------------------------------------------------------------------------------------------------------------------------------------------------------------------------------------------------------------------------------------------------------------------------------------------------------------------------------------------------------------------------------------------------------------------------------------------------------------------------------------------------------------------------------------------------------------------------------------------------------------------------------------------------------------------------------------------------------------------------------------------------------------------------------------------------------------------------------------------------------------------------------------------------------------------------------------------------------------------------------------------------------------------------------------------------------|
|         | <p>GGGAATCGGGTCAACTCTTGGTGTTGGTTCCTACGTCTTACCGGGAGAG<br/> GTCGCTCGCAATACAGCTGGGCCTGCTGTCACTGTCTCTTTCTTCATTGC<br/> TGCTGTTGTCTCCATTCTTGCCGCTCTTTGTTATGCCGAGTTTGCAGCTC<br/> GAGTTCCTAAAGCAGGATCAGCATAACGTTTACAGTTATATGACTGTCCGC<br/> GAGTTCTGCGCTTTCGTCATAGGCTGGAATCTCATCTTAGAATATGTCAT<br/> CGGGACGGCCAGTGTTGCAAAGGCACTGTCCGGGATACCTGGATGCCCT<br/> GACAGGAAAAGTGTTGCAAACGTACATGTTGCAACATTATCCGATGAAT<br/> GTCAGTTTTCTCGGTCTTATCCAGATTGATCTCATTCTCCGTCATCATG<br/> CTACTTTCATTTGTGTTAGCATGGGGCGTTAAAGAATCAACAATGCTCAA<br/> TAATATTTTTACTGCTTTGAACCTAACCACGGTTGGCATCATAATTATTGC<br/> TGGGATAACAGTAGCCAAGCCTTCCAACCTGGTTCATCGCGAAAAGAAGAT<br/> TTACCCGTGGACCCAACTCAAATAACAACCCAGGAGAAGGAGGTTTC<br/> ATGCCGTTTGGCTGGACTGGTGTCTTAGTTGGAGCAGCTACTTGTTCCTA<br/> CTCTTTCATTTGGGTTGACTGCATAGCAACAACAGGGGAAGAGGCGAA<br/> AAACCCCAAAAAGACTATTCTCTGGCCATCGTTTTGTCTCTGTTGATAA<br/> TTTTCTGCGTGTATTTTGAATATCTGCAGTTCTCACCATGATGTGGCCTT<br/> ATTATGACCAGGATCCAGCGGCTCCATTCCCTTCAGTGTTGAGAAAGT<br/> TGGGATGCCTCAGGTTAAATGGATAGTCTCCGTGGGGGCCGTTTTGCT<br/> CTGTGCACCAGTTTGTGGGGTCAATGTTCCGATGGCGCGGATTTTATAC<br/> GCTATGGCTGAGGATGGTCTTATCTACACATTTTTGGCGCAAATCAACAA<br/> GAAAACACTTAATGTTCCCGATGGCGCGGATTTTATACGCGATGGCTGA<br/> GGATGGTCTCATCTACACATTTTTGGCGCAAATCAACAAAAAACACTT<br/> ACGCCATTGTTGCCCACATTCGTGTCAGGAGTTTTGGCAGGAATAATATC<br/> GGCTATTTTTAACCTAACGCAGCTAATCGACATGATGTCCATCGGCACCC<br/> TCCTCGCTTACTCCATCGTTTCATTGTGCATTTTGTCTTTAAGGTACCGAA<br/> AATACGAGATCAGCGAGGAAACGAAACCAGGCCGTAATGAGCCTGCAG<br/> TCAATCATGAAGAACCAAAGAAAGAATATCCAGGCTTCATTTCCGGATT<br/> GTTGAACCTTGAAAATGAACGGCGGGCCACGGATTTCTCGGAGGCGAT<br/> CTCGAAGATTTAATTGGCACTTTTTGTATTTTATGTTTCATGCATGTAGG<br/> AGGTCTAATTTTATGGAACGAAGAATGCGATTCGAAATCAACTTTTGG<br/> TTCAAAGCATACCTCATTGGTGTAGGAATTTTACTTGTGATCAGCGTGAT<br/> TCTCCTATGGCGACAGCCTCAGGCAAACACAGAAAACTAACTTTTACA<br/> GCTCCATTGATGCCAATTGTACCTACTTTAAGTATTTACGTGAACACATAC<br/> CTAATGTCAAAGCTGGATAAAGCAACATGGATCAGATTTGTTGTCTGGC<br/> TTTTATTAGGTCTCTTAGTCTATATGTGTTATGGGCTCAGGCACAGCAAG<br/> GAAGGAAAGAATAGATTTATTGCAGCTGAAAAGAAGGAAAAGATCTCA<br/> AAAAGTTAG</p> |
| BtAPC14 | <p>ATGACGTCCCGCAACGCGACGGACGTGAAGGCGAAGCTGCCCGTGGAG<br/> GTGGACGACGAGAAGGTCCAGCTGAAGCGGAAGATCACGCTGCCCAA<br/> CGGAGTGGCCCTCATCGTCGGCACCATCATCGGCTCCGGCATCTTCGTG<br/> TCCCCACCGGCGTCTTCCAATATACCGGGTCAGTGGGCTCGTCGCTGG<br/> TGATCTGGACGCTATGCGGGATCTTCTCGACGATCGGGGCCCTGTGCTA<br/> CGCGGAGCTCGGGACTTGCATCTCGCGTTCGGGCGGCGACTACGCCTAC<br/> ATCCTCGAGGCGTTCGGCCCCGCTGCCGGCCTTCTCCGCCTATGGTCCG</p>                                                                                                                                                                                                                                                                                                                                                                                                                                                                                                                                                                                                                                                                                                                                                                                                                                                                                                                                                                                                                                                                                                                                                                                                                                                                                                                                                                                                                                                                                                                                                                                                                                                                                          |



CCCTCCTCATCATCCGGCCCACCACCCAGGCCATCGTCGCCATCACCTTC  
GCCCAGTACGCCGCCAAACCCTTCTTCCCAGGGGACTGCAAACCCCCG  
GAGCAGGCCGTACCATCCTCGCTGCCGCCTGCCTTTGCCTACTGACCT  
CCATCAACTGTCTTAGCGTGCGATGGTCCATGCAAGTTCAAAGCGTCTT  
CACCACCGCGAAACTCTTCGCCCTGGCTGCCATCGTTTTCTTCGGCGTC  
GGTCACATCCTGCTCGGTAACACGGAAAACCTTCGATCATGCCTTCGACG  
GGGATTACAACCCAGCCAACATCGCACTTGCCTTTTATTCCGGGTCTCTTC  
GCGTTTGGCGGATGGAACCTATCTTAATTTTCGTTGTGGACGAGCTACAAG  
ATCCTTTCAAGAATCTACCGCGAGCTATATGGATAGCGATGCCGATCGTA  
ACAATTGTGTATGTGACAGCAAATCTGGCCTACTTTGCCGTGGTCCCTGC  
TCATGAAATGCTCACCTCGCCAGCTGTTGCAGTTAGTTTCCACTTAAAC  
ACGAAATTCATCAAATTTCCGACACCTGTAAATTCCTCATTGCCTCATTG  
GGCTCAAAAATTAACCTGGGCAAAGGGTGTGGAGGGGCACCCTTTGCT  
CAAGGGGAGCAAAGGGGAAGGGGTGAAGGGGGCACCGTACCTTGAAA  
GTGTGTCATTTGGGGACCGTATGTTCCGACAAGCACGCTGGGCTGTCCC  
TGTTTTTGTCCTTGTCACATTTGGAGGAGTGAATGGTATTTTGTTCA  
CATCAGCTCGTCTGTTTGTCACTGGTGCTCAAGAGGGACATCTTCCTCC  
AATATTCTCCTTCATACACGTAAAAAGATGCACTCCAATTCCTTCCCTTCT  
CTTACATGTTTTATGTCTCTCTTAATGTTGTGTTCTACCAATGTATTTGTT  
CTGATCAACTACTTCAGTCAAGTTTTGTGGCTGTCAGTTGGAGTATGCAT  
AGCAGGTCTCTTGTACTTGCGCCACACCAAACCTGACATGCCACGCCCC  
ATCAGAGTGCACACAGCTCTACCCATTATGTTTCCTCATTGCTGTGTCTT  
CTTGGTGTCTGTGCCTGTCGTGGCAGAGCCATTTAACACAATCGTTGGA  
TTACTTATAATTCTCTCTGGAGTGCCTGTGTACTACATTGGTATCAAATGG  
AAGACAAAACCATTTCGATTGAAATCAGCACACAATGACTTCACTGTTT  
TCTTACAAAAGCACTATTCGTGCTGAGCCCAGAAGAGTCAGAAAATCC  
TGTCAGTCTCTAG

**Table S9.** Amino acid sequences of the AAAP transporters of the eight species.

| Gene    | Amino acid sequences                                                                                                                                                                                                                                                                                                                                                                                                                                                                                                                                                   |
|---------|------------------------------------------------------------------------------------------------------------------------------------------------------------------------------------------------------------------------------------------------------------------------------------------------------------------------------------------------------------------------------------------------------------------------------------------------------------------------------------------------------------------------------------------------------------------------|
| BtAAAP1 | MEMKSSESASNVTQVMTRSQQEKVFPPRQFKHATSDFETFLHIVKSSLGS<br>GLLATPDAFKNAGIGLGLVGMVAVLVITHATSILVRSSQAICCTLQKPHLT<br>YADTAEYAFEYGNIPAVRPYAGFARKFVKVFSVITYYGVNTVYVVLIASSA<br>KQLIENHIEWSLNIRWYILLVLLVLLPLGLIIKLMKFLAPFSAIANVCLFVGLG<br>IILFKIMDDLPLSERPFVAPIEKVPLFFATMLFGLEGIGTVLPVENEMKNPD<br>HFLGWTGVLSVSMFFIGLVNAIVGLFGYWKYGDAVCGSISLNMEQDWLS<br>ELVKFLIAVAILFTYGLQMTVTSEVVWDSVQDYFHKDNSKVAYYCVRASL<br>VVGTAIVAAIIPNLAPIISLFGAIGFMSMLGLFCPAVIDFVLFYDVEKGLTDWR<br>CWKNILLIIAASFATFLGAYTSLADIISNYS                                                                             |
| BtAAAP2 | MSELDVIQFSFFQEPSTGEPQATELDTFLPQDGSNKDGSSAKYKVQVLPTR<br>PRDAEAAAAGTGHHEKGYWDPFKERKLDHATTDGETLTHLLKASLGTGIL<br>AMPAAFKNAGMITGIFATIIVSLVCTHCSYVLVKCAHSLYHRKKVTTMTFA<br>DVGEVAFANGPPWGRKFSKWARFSILFGLFLAYFGTCSVYTVIIAKNFKIVI<br>EHHSHYNADIRFYIAVLLVPLILLSWIPNLKYLAPISMLANFLMAGGLGITF<br>WYLVWDLPSVWERPQFASWETLPDFFSTTIFAIEAIGVIMPLENAMETPQH<br>FVGICGVLNRGMSGVTMIYILLGFLGFLKFGDAAQDNITNLDITQIAPQV<br>ANIFVAIAVFCTFGLQFFVCLEIGWDSVKGYFPKRQRFYNYIVRTVLVSGA<br>VFLAIAVPTIGPFINLIGALCFSLLGLIIPVFIEFVITYWDVGFSGSNWIVWKN<br>ILVLIFGVLALVFGSATSIKGIAALYAPQGPVADGFNKTLENLSSYNTTTSV |
| BtAAAP3 | MSDNTPLRILKTNLGIKLLKMKPEERQPLIGVAYPIPISENFDDRAMPRPDI<br>RDSPENLSVNIDGGPMNDQFVNATKEEEVKNDFQSARDLAHPTSNLDTLI<br>HLLKGNIGTGILAMADAFRNAGLYLGLVCTLCLGAICTHCMHMLIGCEKE<br>LCERTSVPALDFAEVAETAFAFATGPERLRKFSTVFRMLVNTFLIITQIGFCCAY<br>FVFSQNLHDEIKYFFFDIELIWLILMLVPMILLNWIKSLKYMMPISLLAS<br>ILTTSGLGIIFYVVLQDLPNTNTVPKVASWGQLPLYFGTAVYAFEGIGVILPL<br>ENSMKSPEHMRGYVGILNTGMVIVTCLYTAVGFFGYLKYGDAATRGSITF<br>YMGAELFASHVVRTMALAIFLSYCLQFYVPANIIWPQLVSRFAFLQPEER<br>QYFGEYIFRTLVLFTFLAVIIPDLSAVISLVGAVSSSTLALIFPPLLEMVTF<br>YEKDFSRYRTLKDLLIMLFGICGFLVGSYTSILNILNPPENPL          |
| BtAAAP4 | MPGPGGELKMHNISQNSPEGGNGTKYNEFSINVPHPESPPDGDYDPHTHR<br>VLDAPTTNETLIHLLKGS LGT GILAMPKAFYQAGLLIGTIGTILIGFLCTY<br>CLHVLVRSQYILCKRKRVPILSYPD SMKIALQEGPSGLRMFADASYVIVDG<br>FLIVYQLGICCVYIVFVATTVKQVADELADPIDLRVHMLILLPLILINYVPN<br>LKMLAPFSQVANFITFAGLAITLYIQLDLPVSSRPLVGEPRNYSLVFGTT<br>LFALEAVGVMLALENNMKTPASFGGYGGVNLKGMVIIVFLYVAMGFLGY<br>VKYGELIAGSVTLNLPQGMLAQS VKLIFAVAIFITYALQAYVPVDIIRTY<br>MKQYHSHKNKMLIEYILRTAVVLITFVLAVLIPRLELFISLFGALCLSALGIA<br>FPAIIELCVLWPDQLGTLNYVLWRDVLVIGILALVIGTSISVNDIIVSFQ                                                           |
| BtAAAP5 | MHSNSVITLSNSIIGVSILAMPFCFQQCGIILSLIILFFISIISRLACHFLLKSAV<br>ISRCRSFEFLAFHMFPGAGKTVIELSIVGFLMGSCVAFFVVVVDLGPVAVKS<br>VLNLEMSVQALRPALLIGVAVFIILPLGLVRDIDSLSSICTLSIGFYIILVLKII                                                                                                                                                                                                                                                                                                                                                                                            |

|         |                                                                                                                                                                                                                                                                                                                                                                                                                                                                                                                                                                                                                                                                                                                                                                                                                                                                                                                                                                                                                                                            |
|---------|------------------------------------------------------------------------------------------------------------------------------------------------------------------------------------------------------------------------------------------------------------------------------------------------------------------------------------------------------------------------------------------------------------------------------------------------------------------------------------------------------------------------------------------------------------------------------------------------------------------------------------------------------------------------------------------------------------------------------------------------------------------------------------------------------------------------------------------------------------------------------------------------------------------------------------------------------------------------------------------------------------------------------------------------------------|
|         | <p>AEATPPIFDSSWADKVNYPWPAGILQCLPIFSSALSQCQTQLFEIFGSYLN<br/> LDKINGAIKSSVNMCTAVYMGVGLFGYIAFCSQPLTGNALMNFPPSVTGD<br/> IKLGFVVSVALSFPLVIFPCRASLYSFLYHQNHSSHYELLTRNTGGSSQNV<br/> LLIVTVSLILALLVPSIELVLGLLGSTIGVILCYILPSVFFTRLLKKNTER<br/> LAQVVIIVGVFIMVLGTYTNLFAAEKAISGPEKDMQLNIAISPEKEFPSEIK<br/> HGLEEMREHSMEAFHNVPEKLHLDQANLDLKENADQVKESDDKKNQVS<br/> LVDSNKDLQSQGDAKKEPVKTKSENLMKATRKPEPEPVEPVETKHFND<br/> PQKIEVDANLKPDLPENMNQAKSEAVKKEIIVDQPKIVADESLRQEKAPEK<br/> QVESPNEINVPKKDKEKIYIPKGGKIFKLLHEIPKPNPPSKKDSVNNVNL<br/> EGNLRPEIMDKLKDTPPLPIALQKNINVFVSLIPEKTPENDDKVKNRELL<br/> DHQKNNEPHPRERRDVLTLAEEELSNGKGISVKGIHENEGSETVKLVTRSL<br/> GSVDTDVIENSEKVVILSEVGDKDLKMKNNGENETSDKSHSSLSASKAD<br/> FILDVEEYQSAKLSPDFGNQKSAKFTAKPEHNLGNKLIDESTQNLDfsp<br/> DIQKSDQFAIKSDFNFDNQKSGSSVKSVEPGSQKYDASIPKTDLNI SFH<br/> QSDESAPKSDLNFDNHQGMPEVKTSKIPSSDSNLVNSQSLPELQNHNSAP<br/> SSDSNLGNERNNSASKLKMSMDNASGDITLKETLRSVNSVEMKGVDS<br/> CPKNSSAKKSIQPNRTSNSSKSNSSDKLLNIQAPDRLSSPDNIFNDIESVN<br/> VEISNAFHDPKSFKRDLKSVELVAENDEQILDNILSVRKEIDSISKTIEIK<br/> NDR</p> |
| BtAAAP6 | <p>MGNEKMEKGEYLEKTQSMVTIDGSFNSTSTLKLTDNGTKKIEADDTYEP<br/> FSNRDMTHATSNNGAFFHLLKSSLGSGILAMPNAFKNGGLIFGIVGTILT<br/> GIICTYCVHMLVICSQILSARVKKPTLGFETAFAEAFQTGPTKYKQWAGFA<br/> RE FVYGALFATYYFGNTVYVLIATSFKQVMDSNLGLDWDIRIYILFLAL<br/> PLVPVGIIRTLKYLVPFSAMATVFIMVGLGFTIAYTLEDLPPVTSRHYFTS<br/> WHQLPLFFSTVLFAMEGIGTVIPIENSMKNPGHFLGCPGVLNIAIIIVN<br/> LYGCVGFFGYLKYGDETKGSVTLNLPATALAESIKILVALSILFTYGLQFT<br/> VPTEIVWKRISHKFSEENQEKGYYIMRAF MILGTVVAAAIPNLSPAILV<br/> GAICFSTLGLFCPAIIEITIFWDDDVATPGIPWRWIKNMVLVVVSIFALV<br/> SGTYASHIEMSH EYS</p>                                                                                                                                                                                                                                                                                                                                                                                                                                                                                                           |
| BtAAAP7 | <p>MERLKDSVQPDYQATSPRTPLRINEPSNDSASPSTNANARSPNFETGAPQ<br/> NAGINVLTA AVFVAGEMAGSGVLALPKAVVDSGWIGIFIVIICINAGYGG<br/> SR LGECWAILEERYPEYRGNTRNPYATIAERAVGKWGSYLVSVCMQITL<br/> FGASIVYLLAAQLVQDLLIVVFPVSGFCWWFLIFAVGLIPAMWLGSPKDF<br/> WLVGVGALLSTTVAVVFIATQMLIDGLNLEKLPRHRPHSFKEFFLAFGTIL<br/> FAFGGASTFPTIQNDMVHREKFSKSVMIAFIAITGLYSPLVIGGYIYGDSI<br/> QPNV VMSLSHTTLVSLANIAMAIHLILAFLIINPVCQDLEEMLQVPPEF<br/> CLKRCIVRTCMIMLMIIIVGATVPRFSKILSLVGGSTITLTTFVLPNYFY<br/> LKLSDQRAPNWPVREVPLHMRVYMYELIGIGLVGGCCSTYSALIDMVGP<br/> DPSFTKPCYWP N</p>                                                                                                                                                                                                                                                                                                                                                                                                                                                                                                             |
| BtAAAP8 | <p>MGEIKK PANEKTYILEQQFQSPVSDGPNSDTEQLFRNEKDPHKSGLEVA<br/> SF NYVNSIIGSGVIGIPYAFKEAGFGLGIMMLAFVALVTDYSLVLMVRS<br/> AHISGVYSYQGLMEAAFGSAGFIILSFLQFIYPIAMVSYNIVVGDITIKV<br/> LMRVFNLYPHSLLARRDVVALATIFVTLPLCLMKNLAGLAKASILSMVFV<br/> FFIL LAIFIRFFTLQDVVPPSFDAWEFANWDVIPALGIMAFAMCHHN<br/> VFLLYESI ERADQTKWDKITHFSLSVSFAISAMFGVAGYATFTGYSQGD<br/> LLENYCWDD</p>                                                                                                                                                                                                                                                                                                                                                                                                                                                                                                                                                                                                                                                                                             |

|          |                                                                                                                                                                                                                                                                                                                                                                                                                                                                                                                                                                                                                  |
|----------|------------------------------------------------------------------------------------------------------------------------------------------------------------------------------------------------------------------------------------------------------------------------------------------------------------------------------------------------------------------------------------------------------------------------------------------------------------------------------------------------------------------------------------------------------------------------------------------------------------------|
|          | DLMNLARLFFSCTILFTYPIECLVTRSVIYQIMGNENNVSDLQHLLITCGIV<br>GTTFLLSIMTDCLGVVLELNGVLSAVPLAFILPAASYLKLEPGSVFSDRKL<br>ALGLAIFGCLVAVIGAVLIILDFDSEDTC SHGRVMPYCLNHTLYT                                                                                                                                                                                                                                                                                                                                                                                                                                                    |
| BtAAAP9  | MTDGFDDHPSNRPRRKSLSSESQPLLSSDHSCTSLYDPTTTGVFRYDSE<br>SEWDNEANKQDVQSKKETNSLGAFRSISLQHKKPDVPVFNKAFSYTPAP<br>RYAEFWRSEPVTTCSFPVISQSMHKVATQSSIVTIFSIWNTMMGTSLAMP<br>WGVGRAGILMSVFLFFMMGMICLYTAQKMIQVQKKYGDKHVGEMAELC<br>RVLLGRPGEIIAKVSSIIVLLGANIIYVLMNSFLYYSVTFIYHFGDGIIVSPN<br>STLSGVEACPRNVTPVVEYQRVPGSTFDQLWQLNNTVPLFLALILGPLL<br>NFKSVTFFTKFNSFGTLSAMYLVLFVLVKSIFWGLHVDHEDSPYFSPLV<br>SSNLAATSGMLPLSFFIHSIVITLMRHNKDQTKNDRDLSIAYGLVGLTYCLV<br>GVLFYLCFPLAKSCIDDNLLNLFQNRDLMTVIARGFIFFQLLTVFPLIMYM<br>LRIQIFAAMQLNHYP SLFHVILLNITIVGICVSFAVFFPKIGALLRFTGALGG<br>FICVFTLPCLLYIASEIKEDRLTWQTVVVHSHIPLTGFINVAQFFVND |
| BtAAAP10 | MDTQLATIQTTLLEIKTAESNSCADLVPRKEEQKEKNPNTREFKHATDFET<br>FLHIIKASLGSGLLATPDAFKNAGIALGLIGTAMAVAAITHTTAMLVRNSQT<br>LCYMLKKPFLTYFETAEYAFEYGNLPAAKGHGGLARRFVKLFLSLITYYGV<br>NTIYMVLIASIKQLVETRIDTQWNIRWYILLALIILPVGVIKLMKFLAPFS<br>AFANVCLFGGLGIILCRILRDLPPVSSRPLVAPIEKIPLFISTILFGCEGIGIVLP<br>AENEMKNPDHFLGWTGVLSWSMFCIGISNAIVGFFGYLKFGDEVQGSISL<br>NMQDDWISELVKILIALAILFSYGLQMTVTSEVVWDSVKDRFHKDNSKK<br>AYYCVRSSLVVGTA VVAVIPNLAPIISLFGAVGFSMMGLFCPAVIDLVLYY<br>DPERGWTDWRCLKNILLMLAALAATLLGTYSMVDIITNYE                                                                                                             |
| BtAAAP11 | MSDGGVGVADWASDPSARSTSRPGRSALVSPEIQIERVSPEALHRGPVTL<br>ATHNMRLTLEGKNVRPIITEFDPKKS GVRTERADLVMVKYKCQSN GVPIT<br>MTTGSTLPLVSSTNKDAESGGYNPFHRKVAHPTSDMETFIHLLKGS LGT<br>GILAMPLAFSNAGLWFGLAATFTIGLICTYCVHILVKSSHILCRMKVP SLS<br>FADIAEVAFLAGPTSVQGFAAFSRSMVNLFLVIDLLGCCCVYLVFVAKNIK<br>QVVVDVYAGAEFDVRWYILSILPLLIANLIRNLKYLAPFSMISNLLVGIGITI<br>TFYYMFKDLPSLDSVPHQHFSSEQLPLFFGTAFI ALEGIGVVMPL ENNMK<br>KPQHLIGCPGVLNTGMFLVISLYSGVGGFYLYKYGSKTEPSITLNL PQHELL<br>GQSVKLMMAVAIFLTYALQFYVPFEIHWKSVKHRFTSKPKTAEYSLRVGLV<br>VGTVVLAITPELGPFISLVGALCLSTLGLMFP AIIELVIYWE EPGMGAYNW<br>RLYKNLAIIFGLLGLVTGTYSLSWEMGMGNAH    |
| BtAAAP12 | MDEGYSTWTGLLYVFNLIVGTGVLTLP HAFVQAGWVFGILLLSALAF TSY<br>MAVTFVIEAMSRANAVKMTLRRLRHLQKSKAAFLKQIQGDS DSVSGDEE<br>GDHSRIPPETSPLVPNEYIDKFPAAPRSLFSVDTKVEMVEMAELFFPPWGK<br>VFFFINFCLYLCGDLTVYAAAVGKSLVDVSCMTTSINSTHPDNELCWEGAT<br>ITRRGAYAIFLLL FVLTLPFAFFNVQKTKYIQMFTTLMRTLAFSVMIVLSV<br>QRIIDPTQDHGAPPVVRPAGMPALFGACIYSFMCHHSLPALITPIKDKSKLS<br>RLLSFDFILILTFYFILILTSIFAFP NIEQLLTLNFRPDFNTKLDLEIIDYFLMLF<br>PVLTLASAFP IAITLRYNLQAASVGEDGPWVVRRLVLP TIAVTVP IIVALLF<br>TNIETIVGINGSYAGAGIQYVIPVFLLLRSRALTPEALKNEVNPHQSPFSSPI<br>WPRALLLWAVCCVIFVSVNLADKFLNVS VF                                                     |

|          |                                                                                                                                                                                                                                                                                                                                                                                                                                                                                                                       |
|----------|-----------------------------------------------------------------------------------------------------------------------------------------------------------------------------------------------------------------------------------------------------------------------------------------------------------------------------------------------------------------------------------------------------------------------------------------------------------------------------------------------------------------------|
| BtAAAP13 | MATDQKTNPQFGSDEEIGYVGDSMKAPIIKDDYDPDKDTGDKNLTTYFE<br>TLIHMLKVSLGTGILAMPKAFSNAGYLLGIIGTLAVGALSTYTMQMLVRS<br>EYELCKKRRVPRMTYAQTFEAAFAEGPKTFRPLAGAAGVVCKIILFLFQG<br>GACCVYIVFVAENLKAVGDQYFGKTDIRLYMAYLLGPLILICWLRNFKYL<br>APVSSFGNVMTLICYCITFYMLSDLPSFSTRQAVVELDRFPLFELDRFPLF<br>IGTALFAMEAVGVVMPKSEMKNPRQFRGWFGVLNLCAMVPITILYLLVGL<br>AGYLKYGDSARGSSISLNLDPNEVPAQCCKVMLAFSVYICYAICAYVTFQM<br>LWGDYLEPKFEESKKKLVYEYIGRTLVLVTFGLAVSIPNLELFISLIGALGL<br>ANLGVAFPTIMELLTRWDKYHGCLFALFLLKNICLLFVAVYAFFIGGSTSIIN<br>IYKKVIVGS |
| BtAAAP14 | MASDQKNGSTPAQQERGDVIKTPGDTDYDPDEDLGEKNLTTYFETLLHM<br>LKVSLGTGVLAMPKAFANAGYLLGMIGTIIVGVLCYTTQMLVQSEYELS<br>RRLRVPSMTYPQTFEAAFSEGPKRRCRPFKAAGVTCNLILFLLQCGLSCVY<br>MVFVADNLKAVLDQYIGTTDIRLYMACLLGPLILCWFGLNLYLAPLSFFG<br>NSMTMICYCITFWYVLTDLPSFSTRKAVVDLKQFPLFIGTALFAMEAISVVI<br>PLKNEMKRPAQFRGSFVNLCSMVPITILYLLVGLGGYLYGDAARGSSISL<br>NLPTSEVPAQCCKLMLAFSVLISNTVLTYYVTSTILWEEFLKSRFENSKRKV<br>VWELSARAFLVLATFVIAASIPNLELFISLIGALGLANLGLAFPVIAETLTFW<br>DRYHGCWFFFILKNICLLAAIYAFFIGGATSITIYEKLMGDTLF                    |
| BtAAAP15 | MTKTESKDMMSKISEAERNKSKTKIIDDKYDYDPYDQPAPENATSYADSL<br>TILLKFSLGTGILAMPRSFHNAGYVVGFIGTMVIGFLTTYTIHMIMSAYEYEL<br>CKRKRVPNMSYPETMEAAFEYGPRKMRKFKNAAWFMCYIFLLIYQTGTS<br>CIYLVFIADNLKEELDLFFGGSTDIRMVIVYLLIPLILISMVRNLKLISPLASL<br>GHIFVMICFSIIFYIFRDIPNIAERKPVGTMQGIPLFFGTVLFAMEAIGSVM<br>PVKNEMAKPEQFTSRFGVINMAMVPIVLLYTIIGLFGYLQYGDKTKGSITL<br>NMPQHNLFGHTVKLLLAASVYINYAISNYVIYDLVWPCLTSKMEKNSHKL<br>SYEYCVRIAIVLITFGFSIAIPNLELFISLGLSLCLVNLGIFFPVILQTLTFWDE<br>FRGPRFYTFLIKNIFLIIAILGFVIGVGRSSIEIYNTVILPSFS            |
| BtAAAP16 | MGFKEKSDSQAVLDVEVSGDSPDLDEHYEPHDYQPPGKSASYCEALFILV<br>KASLGTGILCMPRAFYNAGYVVLGAVGTIFAGVISVLSVHLIANTEHELRRR<br>KRIPRMTYPETLEASFEMGPGNVKRYKGIARVVCTVALTMQAFGSDCVYA<br>IFIAVNIKEICDHFFTPAPLKFYLLCCLLPFIVICWIRNLKYLAPGSTIGTACSI<br>CCIGAAYYIFSQPITTEGRKTVGSLRDFALFFGAALFAQGDFGVVPLKN<br>RMTKPAQFGSVCVNVAMIPDVFLYVIIGVFGYLAYGDNTRDPITLNMP<br>QTGFAGDLIRFLLAVSVFAMYPICNYVVIELLWDKNLKLKLQDVKHRKSW<br>EYAFRTAVTCANILFCIAVPSLELVMSLVGSLMVPALSLWFPAIMYTLTFWD<br>EYRGKFAFFLLRSSILLTGVFALVSVSITVFEIYETML                          |
| BtAAAP17 | MGLEKKSESRTVLDVGVNEDIPDFSDENYEPHDHEPDGKSASYFQAFSVL<br>MKASLGTGILGMPRAFYKAGYILGTISTIISGGLTILSVHLIARTEHELRRR<br>RIPRMTYPEVAEAAFEKGVFRRFKRVS RNICFYGLVLTEFGTTAAAYAIAE<br>NLKAVCDNNFSPAPLRFYLLCCLLPVLCWIKNLKSLAPVTSLGTCCSIG<br>CIGTIYYIFISQPISLEHRKASGSFNDFALSFGTTLFALEAFPEILPIKNRMTK<br>PGEFGSTFGVLNAAMVPNTALCVVFGVFGYLAYGKNTLSPITLNLPQTGM<br>VGD LIRFLLGASIFMSYPIGNYVVVELLWHKNLKLRYEKIPDYWEYVFRT                                                                                                                        |

|          |                                                                                                                                                                                                                                                                                                                                                                                                                                                                                                                                                   |
|----------|---------------------------------------------------------------------------------------------------------------------------------------------------------------------------------------------------------------------------------------------------------------------------------------------------------------------------------------------------------------------------------------------------------------------------------------------------------------------------------------------------------------------------------------------------|
|          | CVTCSNILCCIAVPNLELIMSLVGSMLMVPALWLPALMHTITFWNEYTGIK<br>FLIYVIGPFISSYTISIMLNVCLVTILLIL                                                                                                                                                                                                                                                                                                                                                                                                                                                             |
| BtAAAP18 | MLYFADPAIAKMEGNCNRGKMGFNKTTDSQAALDVDLNEKNPEIGENYE<br>PYNHEPAGKTASYIEALLILIKASVGTGVLGMPRAFYNAGYVLGTMGTVF<br>AGILTTVTVHLISNSEHELCCRKRIPQMSYPETVEAAFEHGPNSKRFKNT<br>ARIICQLALVMLEFGADCAYAIFIADNIKEICDHIFSPAPVRFYLLCLLGPLIF<br>MCWIRNLKFLAPGSTLGTGCAIGCVGVVVFYFIFSQPITLEGRKAAGSLKDF<br>ALFFGQVLFAGAYGMVVS LKNRMRRPASFGSPFGVNVAMVPNLVLYVI<br>MGFFGYLAYGNQTKSSVTLNLPQTGFIGDLIRILMAGSIFTTYPLCNYIVVE<br>QLWHKNLALRFEDNKRIVFWEYVVRTALTCANIACCIAIPNLELVMAFTGS<br>LMVPTLGIWFPSIYTLTFWNKYTGIKFAFFLSRTIIIMIVGVFASVISLSTTV<br>REIYGTAFA                         |
| BtAAAP19 | MELGCNRRGKMGFNKTTDSQAALDVDLNEKNPEIGENYEPYNHEPAGKTA<br>SYIEALLILIKASVGTGVLGMPRAFYNAGYILGTMGTVFAGILTTVTVHLIS<br>NSEHELCCRKRIPQMTYPETVEAAFEYGPNSRRFKNTARIICYSALVLE<br>FGADCAYAIFIADNIKEICDHIFSPAPVRFYLLCLLGPLILMCWIRNLKFLAP<br>GSTLGTGCAIGCVGVVVFYFIFSQPITLEGRKAAGSLKDFALFFGQVLFAG<br>AFGMVVPLKNRMRRPASFGSPFGVNVAMVPNLVLYVIMGFFGYLAYGN<br>QTKSSVTLNLPQTGFIGDLIRILMAGSIFTTYPLCNYIVVEQLWHKNLALRF<br>EDNKRIVFWEYVVRTALTCANIACCIAIPNLELVMAFTGSLMVPTLGIWFPS<br>IYTLTFWNKYTGIKFAFFLSRTIIIMLVGVFASVISLSTTVREIYGTAFA                                         |
| BtAAAP20 | MRFNKNSDSQAADVEGSDSVTNNSDDYEPHDQLPPAKSASYIESLFILIK<br>ATLGTGILGMPRAFYTAGYVLGAVGTLFAGILTTGSMILIGKSEHELCCRK<br>RIPRMTYPETMEAAFELGPGCLRRFKGAARFLTTAIVMLEFGTDCAAYAIFI<br>AVNIKEICEQHFSAPLRFYLLCLLGPLIVMCWVRNLKYLAPGSTLGSFCA<br>VGCVAAYYYYIFSQPMTLEGKKAAGSVRDFSLFFGQVLFALGAFGVVPL<br>KNKMTRPAQYGSVCGVNAATIPDIFLYIIIIGVFGYLAAGENTQNPITLNM<br>PQTGIVGDLIRILLACSIFTTYPLCNYVVIEQLWHKNLRLWLGDVKNPHQ<br>WEYAFRTVVTCANVLCIVVPSLELVMSLVGSLMVPALGLWFPAIMYTLTF<br>WNEYRGVKFALFLLSIVLALTGMFALVVSLSLSTTLTEIYETVL                                                   |
| BtAAAP21 | MTRDNHVRHLHLENRQSVKHGIDNPAMLENGSTEQVCTPEKNEKKVSESK<br>EVLTRITVVKSPSSLEKPLDDDDYPYLHRDVKHPTSYSDTFFHMLKASLG<br>TGILAMPNAFHNAGFTVGTIGTLVIGFLCTYAIHSLIGAGYELCRRRKVPS<br>MTYPQTSEAAFEEGPQWLRWFPTPYAAFTTQLFLILYQIGASCIYVVMASN<br>IKAVCDEYYAETDVRLYMVYILIPILICWIRNLKLLAPFSSAANFVTIVSFG<br>ITFYIYFSDIPHISQRQAVGKVENMPLFFGTVLFAMEAIGVILPLENEMGNP<br>KRFASFGVLTSMIPITLLYTFVGGFGYMKFGEKAEGSITLNLPKDEVLA<br>QSVKMLLAASIYMCYALSCYVAFDLMWNGWIAAKLEKNEHKTFWEYVT<br>RTSIVLVFTFLAVAIPNLELFISLIGALCLATMGIAFPAAIQMLTFWDYYRGS<br>FVLFLTKNMILILIALLGFFIGTSTSLNKIYHEFFLS |
| BtAAAP22 | MSNEEVPLLSGVGGVGKSKCSFKGLSLFFASLCVIDLFGVFPIVALPRAIV<br>DCGWLGLPLAFTVFTLQIYTALLGRSWVMAEMIEPSIVEKSRYPYAALA<br>ELTFNTRMRKFVTFLLDITIFGGGVPNLLVASQNLQILGLKISNFEWDVSYC<br>YWMLLLGVALCPAMWLGSPKDMKWLAASSVCIVVTVGALTWYLLLHEP                                                                                                                                                                                                                                                                                                                              |

|                                |                                                                                                                                                                                                                                                                                                                                                                                                                                                                                                                                                                                                                     |
|--------------------------------|---------------------------------------------------------------------------------------------------------------------------------------------------------------------------------------------------------------------------------------------------------------------------------------------------------------------------------------------------------------------------------------------------------------------------------------------------------------------------------------------------------------------------------------------------------------------------------------------------------------------|
|                                | LPPGAVPPDLPEVSWQSLAIAYGILAFQFDIHPMILTVQVDMKKNKLGHA<br>ILAGFLVSGGLSIVTCIIHYLRFGTSINYNILPGLQPHILLYVDAFLVTLQICLS<br>MVGGTALFQDVEDKLGVPRDFNWKRCVVRSSILMTAVLIGEAVPRFDLV<br>MGLLGGALTGPLMFILPPIIHYRLRSILWRKQLIARIDRYEADGARLREELL<br>RKTTLPPQQLSYAPNAFGLVTNDMSTGKEIPTGPASGSFSSETSSSLGSLP<br>QPYLPPSELLDPPLAPRSLVQHLVGLVSTEVDSESVSQLGCCELAMTFVIVG<br>AGITATVVATYYALVGNIAAYATFSPPCIVSVNEASRAIFDELVT                                                                                                                                                                                                                          |
| BtAAAP23                       | MTYFGRFYIPPISAAVNVAWATIKAVIPEDSPCVELIQKMTGQRTGEEAGGA<br>QGKQEPNEHVNFQAQFNGPKATDNTEMATMSGYGSADRGEDEDFGGKQV<br>NFSKSRATTESGCSFDEFGERGRHKINEWQAAWNVTNAIQGMFIVSLPF<br>NVLRRGGYWAIGAMIGTAYICCYTGKILVECLYELDTMTGERVRVRDSYVSI<br>ARECFGPLWGARIVNMAQMIELLMTCILYVVVCGDLLIGTFPEGVIDTRS<br>WMMLVGCFLVPLGFLKSLHHVSTLSFWCTMSHIFINVIILGYCLELPSWG<br>WSKVKWTLLENFPISLGVIVFSYTSQIFLPTLEGNLIDRSKFDWMLDWSH<br>IAAAIFKSLFGYICFLTFQNDTQQVITNNLHSPAFAKGLVNFVLVIKAILSYP<br>PYAAACDLLEKSFFKGRPETRFPTIWHMDGELKVVGLAFRVGIIVGTVLM<br>AILPHFIILMGFIGNFTGTMLSFIWPCYFHLKLGDTLERKTVIFDCFVICL<br>GCLFGIIGIYDSGSAMIKAFEIGLFP                        |
| BtAAAP24                       | MGFNKKTESQNTLDLSVNDEKPEKDLEKEQEEYDPYKQEQTGKTTSYF<br>EALLILIKASLGTGILGMPRAFYNAGYLLGTIGTIVAGVLTQTQTAHMISSTE<br>YELSRKRVPRLTYPETIEAAFELGPGNFRFRKLAGQICYVMILLEFGG<br>DCVYAIFIAENVKAICDHRYGTHSLRWYQTWLMIPLILICWIKNLKYLAPG<br>STLGTGCAVGCFCVYIYFIFSQPIALEGRKAIGSFREFALFFGTALFAMGAF<br>GIVVPLKNKMTNPKRFGGTFGVVNATMIPNMTMYVLMGFFGYLAYGNF<br>TQSSITLNLPTGAIGDVIRILMAGSIFTTYPLCNYVVTDMVWHKWMKLL<br>FGDNKHLKWEYVVRTCLCFTNYLCCIAIPNLELFMSLSGSLCLPALGIFFP<br>IIIHTLTFWHSYTGWRFFFFLFRALIVALGLFAFLVSFSTTVYEIVTSIFLAE<br>DNHV                                                                                                       |
| BtAAAP25                       | MSNEEVPLLSGVGGGVGNSKCSFKGLSLFFASLCVIDLFGVFPIVALPRAIV<br>DCGWLGLPLAFTVFTLQIYTALLGRSWVMAEMIEPSIVEKSRYPYAALA<br>ELTFNTRMRKFVTFLLDITIFGGGVPNLLVASQNLQILGLKISNFEWDVSYC<br>YWMLLLGVALCPAMWLGSPKDMKWLAASSVCIVVTVGALTWYLLLHEP<br>LPPGAVPPVLPEVSWQSLAIAYGILAFQFDIHPMILTVQVDMKKNKLGHA<br>ILAGFLVSGGLSIVTCIIHYLRFGTSINYNILPGLQPHILLYVDAFLVTLQICLS<br>MVGGTALFQDVEDKLGVPRDFNWKRCVVRSSILMTAVLIGEAVPRFDLV<br>MGLLGGALTGPLMFILPPIIHYRLRSILWRKQLIARIDRYEADGARLREELL<br>RKTTLPPQQLSYAPNAFGLVTNDMSTGKEIPTGPASGSFSSETSSSLGSLP<br>QPYLPPSELLDPPLAPRSLVQHLVGLVSTEVDSESVSQLGCCELAMTFVIVG<br>AGITATVVATYYALVGNIAAYATFSPPCIVSVNEASRAIFDELVT |
| AaAAAP1<br>(AAEL00078<br>0-PA) | MSFLNNLRSLPLPPVKNVLNVAMQTARQTIPSKNKQNDYEQPVGENVGP<br>AAGVRSPPQVPPRPQNVHFAETDGDGTGTTTELNPLNPFTNPKAYYQEGTD<br>QPSAGQYQETGFNQPSDFENGYQAGGYPPRQGSVQSFSDSTFAGGCEGE<br>APGGMKINEYQAAWNVTNAIQGMFIVSLPFAVLRGGYWAIIAMVGIAYIC<br>CYTGKILVQCLYEPDPTGEPVRVRDSYVAIAKVCFGKKIGARVVSIAQIIE                                                                                                                                                                                                                                                                                                                                          |

|                               |                                                                                                                                                                                                                                                                                                                                                                                                                                                                                                                                       |
|-------------------------------|---------------------------------------------------------------------------------------------------------------------------------------------------------------------------------------------------------------------------------------------------------------------------------------------------------------------------------------------------------------------------------------------------------------------------------------------------------------------------------------------------------------------------------------|
|                               | LLMTCILYVVVCGDLMAGSFPDGDTRSWMMLCGIFLLPLAFLKSLHH<br>VSLLSFWCTMSHLLINAIIVGYCLLEIGDWGWSKVKWRMDFENFPISLGV<br>VFSYTSQIFLPTLEGNMEDRSKFNWMLDWSHIAAAAFKALFGYICFLTQ<br>NDTQQVITNNLHSPSFKGLVNFCLVIKAILSYPFFAACELLERAFRGP<br>KTLFPVWELDGDLDKVGWGLAWRLAVILGTIMMAIFIPHSILMGFIGSFTG<br>TMLSFIWPCYFHLKLGKGLLDQKQRACDYFIIFLGVLFVGVVGIYDSGALI<br>KAFEIGLPF                                                                                                                                                                                             |
| AaAAP2<br>(AAEL00111<br>4-PA) | MERNSVQTVTLMNSIIGVILSMPFCFQKCGVVLSLVLLLSTYITKLVCS<br>YMIKSIIARRKTFEQIAFYAFGSCGKLLVELCVVGYLLGTICIAFVVVGD<br>LGPQIAAKMLAINESSTLRTWVMIVVTAVCIPLGLLRNVDSLSTVCTASLG<br>FYVCLILKUMAESSEQISKAGWFDRLDMWKTEGILQCLPIISMALSCQM<br>LFEVYATMPTTSLDKMSRVIQKSTSLCACIYGLIGFFGYVAFNGHQFSGN<br>LNFSPSYVSDIIGFVLSVAFSFLAIFPCRVSLYSLYKKTTHSDAHMYIPES<br>KFRPLTVAIVCTALVLGWMVPSIEVVIGLVGSTIGVAVCIIPAACYMHICK<br>TNISEKQLAQVMIVFGFFIMILGTIANLEAMNRVPEKKYETGVKEDVVLAP<br>VVNVEK                                                                              |
| AaAAP3<br>(AAEL00142<br>9-PA) | MSSGSPKKDVLNLDMLQLLSKSSPTRNGDMIVDDNYDPHLHRNRPHPTTF<br>ETLVHLLKGSGLGTGILAMPQAFYNAGYISGFVNTILIGILCTYCLHVLVQA<br>QYILCKRHRVPILTYPISMKMALEEGPACLRRFSPYAVVIVDGMIVYQLGI<br>CCVYIVFVATNIKQLVDVYLNLDVKIHCMLLVPLIGINMIRNLKILAPFSTL<br>ANVITFVGLGMILYVLDLPSLSEMEMVTDIGRFPLFFGTTLFALEAVGVI<br>IALENNMATPKSFGGTFGLNVGMFVIVALYAGMGFLGYWKYGAEALGS<br>LTLNLPEDILSRITRILFAVAIFISYGLQCYVPVDIWNVYLVQKYKDSNNK<br>FVYEMLVRIVVIVTFLLAVAIPRLGLFISLFGALCLSALGIAFPAIMEICVL<br>WPKLGLPGKLVLWKDIIILIFGIIGLVAGTYTSVRDIIYSFQ                                      |
| AaAAP4<br>(AAEL00221<br>4-PA) | MKNEREPLLSTSDNSFDATNNEHQHLLARPDLRSPENMIVDVGNDNDSL<br>SQTASKEDPAYGSASDAYDPSMHRTLEHPTTNMDTMIHLLKGNIGTGILA<br>MPDAFKNAGLYVGLFGTLLMGAICTHMHMLVRCSELCRRLQVPSLNF<br>AEVCSRSFETGPIGLRRYSNLARTLVNMFLVITQLGFCCVYFVFAANLKE<br>VVAHYFFDLDRVYLLMLVPMVLLNLVKNLKLTPVSLVAACLTVAGLA<br>CTFYFVLQDLNTHTVKPFASWAQLPLYFGTAVYAFEGIGIVLPLENNMKT<br>PEDFGGWTGVLNTGMVIVACLYTAVGFFGYLKYGEGVQGSITLNLPGDQF<br>IAQLVRIMMALAIFFSYGLQFYVPISILNPSIKRRLHSEQAQLIGEYLLRVGL<br>VVFTFLLAAMIPNLGAVISLVGAVSSSTLALIFPPLIEIITFWPDGLGKNYVW<br>LWKDIAIMTFGICGFVFGTYTSVAQIINPDLH |
| AaAAP5<br>(AAEL00395<br>6-PA) | MTSTQNRFSFETSKDADDEDEYNPFKQRIRKANSSIGTLIHMVKGSLGTG<br>ILAMPFAFKTGGLVFGILGTMLVALIYAHCVHLLVGTSQKACKRSRIPVLG<br>FAETAENVFANGPFRLRKFAGFAKAYIDYMLLVISYFSVCVYLVFISTTLRD<br>VINYELQIDWSIRIYILLTTCVAFITQVRELKYLVPFSLLANSSIIVVFIITLF<br>YIFKEPVAISNRKFWPELSNLPFFGTAVYAIEGIGIVLPVENKMKQPQHFL<br>QTFGVANFAICFITILYNIVGFFGYATYGEGETKGSVTLNLPNDELLAKSTQL<br>LAAVAILLTLGLYYYYPMEILWKKIGHKIPERRHNLAQVGIRLGIVVAMMG<br>LALTVPQLEPFIFVGSIGSATLALLTPIVLDTVYRWPTGYGWMRWRLKN<br>ILLGAFGLFILAVGTYFSLMDIVAIYE                                                |



|                                 |                                                                                                                                                                                                                                                                                                                                                                                                                                                                                         |
|---------------------------------|-----------------------------------------------------------------------------------------------------------------------------------------------------------------------------------------------------------------------------------------------------------------------------------------------------------------------------------------------------------------------------------------------------------------------------------------------------------------------------------------|
| AaAAAP6<br>(AAEL00397<br>0-PA)  | MRLHRVHRKFAREGHQRRPGLERPNIHPADDDPHVDRSNSYAQVPS<br>PVLGAGQPVYRCDLWHHAVLHLQDPLVFDDKPNFASFATLPLFFSTVIFAM<br>EGIGVVMPVENSMAKPQHFLGCPGVLNTAMGTVITLYAVIGFFGYVRYGD<br>ISAGSITLNLPTEDILAKIAQLLIAAAILFTFGLQFYVPM DILWKKIHDKIPK<br>DKHNFSQIAIRTGIMILMGGIALAVPDLEPFIGLVGAVFFSSLGLLVPCVVET<br>VFLWPNELGTFKWILIKNVIFSAFSIFALISGSFVSIEEIVKLYTNDGHTE                                                                                                                                                   |
| AaAAAP7<br>(AAEL00585<br>3-PA)  | DFSEVKDYNPFHRKIAKPNSTIGTLIHLVKGTGTGILSMPLAFRNGGFAF<br>GIVGTVISGIIYAHCVYLLVSTSRKACRRSFVPM LGYTETVENVFTHGPRG<br>VKKYAILARFLQVVKILQFYLLICVYLVFIGNTLKDIVNHDFQLGWDTRVF<br>IFLAAVPLIFTTQIRELKYLVPFSAIANALHITAIGITMFYILKEPISLENRSMW<br>PAWNTLPAFIGTVMYALLGIEYVLPNENKMKRPEHMLGNCGVVNVAVCFI<br>TALYTIVGALGYAQYGGDTKGSVTLNLPANEALAKSTQLLTITAILSTGLI<br>NYVPTDIVWRKIQH KIDPKRHNFAQISFRFGMLVLLTAIAVGVPELEPFVGL<br>TGSISGGSLVVIIPAVIDTVFRWPGGFGRMNWILWKNVLLVLFGLLVLGIGT<br>YFSVVDIVAIYEKE            |
| AaAAAP8<br>(AAEL00585<br>4-PA)  | MAIPLAFKNGGLFFGAIGIIAVCFLYVHCVDLLVGTAKACKRYRVPTLGF<br>AETADIVLVNGPSTVRRFASFVRNYIDGMLVFHSLIFCLFQIFIATSLRDVI<br>NNQLQLAWSTGVYVAIVTVPIALIIQIRVLKYLVPFSAIENALMIIAFGITLS<br>FLVNEPVS LDNRNLWPEWNLPPFFIRYWWVQLYETTTFRNSSNFSTILFAI<br>QGIRFVLP IENKMKHPQNFLGTCGVVSQAIAFLSILYIATGFFGYACYGDDT<br>KASITLNLPSDSRLAEFTRLLAALSALFQMGLGFYVPM EIIWRRIETKIPED<br>HHNVAQIAIRFGLMTILTAISVGV PDLQLFVGLVGSFCSSNLVLLVPVLDV<br>VFRWPNDYGPCGWILKNVILAVFGVLLL VFGTYSSIRRIIKTYE                                  |
| AaAAAP9<br>(AAEL00585<br>5-PA)  | MSSSVENLEKNDDDDYNPFHRKIKKPNTTIGSFIHMIKGS LGTGIMAMP<br>LAFKNGGLIFGSIGTVVICVLYAHFVHLLVHTSQKASKRSQVPMLGFSATA<br>KDVF GKGP SLRLYTSYASGFIDSMVIDGFLTACLYIVFIAKSLQDVLYNQ<br>LQLDWDTRVYILLLL PLLVIIQVRK LKHLVPFTAIASGLIISAVGISLFFIFTA<br>KIDLSSKSMWPEWMNLPSFVSTVLF AISGINTVLPVENNMKHPEHFLRPF<br>VMQTAFGCLTVLYGVTGFFGYAQFGNATKASITLNLPSDNGWAQTTR LIS<br>AMGVLVALGFSLYVPLEILWPRIESRLSPKRQNC AQIGMRSMFALAMVLT<br>LVVPEIEPFIGLLGSFSTASLSILFPVSLDMIFRWPNGFGRCRWHLVKDVVL<br>WVFGFLVFLIFGTYFSIMDIVEIYK |
| AaAAAP10<br>(AAEL00585<br>9-PA) | MLVIDSILSICLYIVFIAESMQGVIYNQQGLDWDTRMYILMIPIVIMQVR<br>ELKQLVPFTAVANMLIIASVGVSLYFIFREPISLADRNLWPQWTTFPSFVSTV<br>LFAIAGIKTVLP IENKMKHPGDFLRPLGVMQSGLGILTVLYGVTGFFGYAQ<br>YGEITKGSVTLNLPSDSGWAETTRLLSAIGILVSLGFTLYIPMEIWPRL EAK<br>IPLRWHNVGQISIRTGLAIAMVGFALVAPKVESFIGLLGSFGTAVLSVLLPV<br>TVDTLYRWPTDFGWCRWRLVKNSVLILFGLFVLT VGTYFGILDIVAIYQ                                                                                                                                              |
| AaAAAP11<br>(AAEL00586<br>5-PA) | MKVREDDYDPFKHRQVEKPNSTIGTLIHM IKGSLGTGIMAMPLALKNGG<br>LIFGTIGTIVICVIYTHCVHLLVSTSQRACKKGQTPVLGYSETVHAVFSDGP<br>SKVRRIAKFTMGFVDMILIQSILT CCLFLVFIKSLHDVIYNQLGVDWDV<br>RIYILIELIPVVVITQIRELKYLVPFSLIANALLISAIGITLYFILSKPFSLDNRN<br>LWPEWSSAASFASAVLFAIQGIRYVLPVENKMKHPQHFLSSLGVLNIAMAF<br>LISLYIITGFFGYAQYGDKTEG SVTLNLPSENLWAESTRLLSGIGIMFSLGLS                                                                                                                                           |

|                                |                                                                                                                                                                                                                                                                                                                                                                                                                                                                                                                                                 |
|--------------------------------|-------------------------------------------------------------------------------------------------------------------------------------------------------------------------------------------------------------------------------------------------------------------------------------------------------------------------------------------------------------------------------------------------------------------------------------------------------------------------------------------------------------------------------------------------|
|                                | YYVPMDIMWSHIHSRLSQKWHNWGQIIVRFTMLVILAAVAIGAPEIGPFVG<br>LVGSFGSSTLAILIPVTLDVIFRWPHGFGRMKWLLWKNLILVFGVGLFILVAG<br>TYFSVKDVVAIQ                                                                                                                                                                                                                                                                                                                                                                                                                    |
| AaAAP12<br>(AAEL00719<br>1-PA) | MTVDKGHSNTAFVGDQVTSKKSAPVKTISANNYVLEIQDKKPGLETDY<br>NPYEHHRHVEHPTTSNETLIHLLKGS LGTGILAMPNAFHAGWLVGAVGTL<br>LIGILCTYCIHLLIKA EYELCRRKRVP SLNYP AVTQTALLEGPDALKPLSNVI<br>IHIINVFLVYQLGTCCVYVVFVASNIKAIADYYTETPTDVRFLMLIILLPLI<br>LINWVRNLKFLAPFSTLANFITLVSGIILYIFREPVTFEGKEAFGKISEFPL<br>FFGTVLFALFAIGVILPLENEMKKPKQFGGNFGVLNKAMVLIVTLYIGMGF<br>FGYLNYGADSKGSITLNLPEQEILAQCVKGMLAFAIYITHGLACYVAIDIT<br>WNDYAKKRFSGDSPRSVFYEYIVRTVLVLTFLAVAI PNLELFISLFGALCLS<br>ALGIAFPALIQTCYWHQRHGWDKTMIVKNV VIGVIAIVGLVVGTTTSL<br>KEIVHTFFEEE                  |
| AaAAP13<br>(AAEL00719<br>3-PA) | MSSGSPKKDVNLDMQLLSKSSPTRNGDMIVDDNYDPHLHRNRPHPTTTF<br>ETLVHLLKGS LGTGILAMPQAFYNAGYISGFVNTILIGILCTYCLHVLVQA<br>QYILCKRHRVPILTYPISMKMALEEGPA CLRRFSPYAVVIVDGFMIYVQLGI<br>CCVYIVFVATNIKQLVDVYLNLDVKIHC MILLVPLIGINMIRNLKILAPFSTL<br>ANVITFVGLGMILYVLDLPSLSE REMVTDIGRFPLFFGTTLFALEAVGVI<br>IALENNMATPKSFGGTFGVLNVGMFVIVALYAGMGFLGYWKYGA EALGS<br>LTLNLPEDILSRTIRILFAVAIFISYGLQCYPVDIWNVYLVQKYKDSNNK<br>FVYEMLVRIVVIVTFLAVAI PRLGLFISLFGALCLSALGIAFP AIMEICVL<br>WPKLGPGLVVLWKDIILILFGIIGLVAGTYTSVRDIIYSFQ                                           |
| AaAAP14<br>(AAEL00719<br>7-PA) | MDNFKKKTNRPNLEYTPIRPQWTGSSKSEVNNYIFGNMKDSLSDVAAQ<br>TVAGSTLPLVGMPREDEEAGSYNPFHRKLTHPTSDVDTLVHLLKGS LGS<br>GILAMPLAFLHAGLWFG LGATLAIGAICTYCIHILVKCSHILCRRAQIPSLGF<br>ADVAETAFLAGPDGVKKYSRLARFIINLFLVLDLMGCCCIYIVFVATNVKQ<br>VVDYYTHSHYDVRYYILVSLIPLILINLIRKLYLTPFSMIANILIGAVGIT<br>LYYITDLP AFSEKGVADVHHMPMFFGT VIFALEGIGVMSLENNMKTP<br>QNFICPGVLNIGMTVVVVLYALVGFGLGYLKYGEDTKGSVTLNLPVEDIL<br>AQLVKIMIAVAIFLTYSLQFYVPM EIIWKNVQHNFNEHKNAAEYGIRIGLVA<br>ITVFIAAALPNIGPFVTLIGAVCLSTLGMMPFAVIELVTFYEKPGYGRFNWIL<br>WKNIFLILFGVVG FITGTYSIEEFSQHLEEV |
| AaAAP15<br>(AAEL00720<br>0-PA) | MCAHFNEENNEGSK EETLSSLPQASFN YINSIVGSGVIGIPYALHRAGFGL<br>GLFLLVIVAVITDYSLILMVR CGHLSGRFSYPGVMEAA YGKAGYLLSLLQ<br>FMYPFLAMISYNVVVGD TLSKVLVRLVPSWGSSMGPVRFVVLVVTVFV<br>VIPLCLYKNV SRLAKASFLSLACVVIILFAVVYKLLAGDYAVVPDTPESWR<br>FAHTDLIPAVGIMAFMCHHNTFLVYQSMRNATLERWEKVTHISVGF AW<br>LVAVCFGIAGYCTFRALSQGD LLENYCWDDLMNFARVLF SISILLTFPIEC<br>FVSREIVRTQIKRFYSQEVVEYD TDKDP SHATGAGEEDDKSVATTLVIVLA<br>AFIISPYTECLGPVLELNGLLAAIPLAYVLPGLAYIQLSPHSLFSQEKLPAAG<br>LVLFGTFTISGAALLV PNLIGDCRTGIIMGYCRDDELAVNGTMAGTTPST<br>DCTGDGV                    |
| AaAAP16<br>(AAEL00745)         | MAPNQRDLETASLLTASN DNNNDN SSSIRS NLNGDHRLKPSLLEVAIRNN<br>MRHYGSTPNQWQKITRYDPLQHRKLENPTS NLDTLIHMLNGLNGLTGILA                                                                                                                                                                                                                                                                                                                                                                                                                                    |

|                                 |                                                                                                                                                                                                                                                                                                                                                                                                                                                                                                                                                                                                      |
|---------------------------------|------------------------------------------------------------------------------------------------------------------------------------------------------------------------------------------------------------------------------------------------------------------------------------------------------------------------------------------------------------------------------------------------------------------------------------------------------------------------------------------------------------------------------------------------------------------------------------------------------|
| 8-PA)                           | MPDAFKNAGLYVGLFGTMAMGVICTHSMHTLVKVSHELCHRYQVPSMS<br>FSEVGRYALESGPSSLQRFSLRIGVLINCFIIMQLGFCCVYFLFVAVNLHDF<br>LEYISIKTDVFTVLLGILLPLIALNMIRSLKLLTPTSMVASLLAISGITISSMFL<br>LKDLPRSTSVAPASSWSTIPLYFGTVMYAFEGIGVILPLENNMRTPKDFCR<br>WNGVLNTGMTIVVCLYSVGFYGYLKYGDAAEGSITLNLPSHLFLAELVR<br>LLMAVAVFASYALQFYVPISILGPVRRQFGSHRAQDYAEYALRVALVLLTF<br>TLAAIIPNLGSFISLVGAVSTLALVFPPLLEIVTYWPSRQYGTWNWILWK<br>DLLMVAFGLSGFLIGTSMSVVEIVTEWQ                                                                                                                                                                         |
| AaAAAP17<br>(AAEL00891<br>3-PA) | MTVDKGHSTAFVGDQVTSKKSAPVKTISANNYVLEIQDKKPGLETDY<br>NPYEHHRHVEHPTTSNETLIHLLKGLGTGILAMPNAFHAGWLVGAVGTL<br>LIGILCTYCIHLLIKAEYELCRRKRVPSTLNYPAVTQTALLEGPDALKPLSNVI<br>IHIINVFLVYQLGTCCVYVVFVASNIAIADYYTETPTDVRFLMILLPLI<br>LINWVRNLKFLAPFSTLANFITLVSGIILYIFREPVTFKGKEAFGKISEFPL<br>FFGTVLFALFAIGVILPLENEMKKPKQFGGNFGVLNKAMVLIVTLYIGMGF<br>FGYLNYGADSKGSITLNLPEQEILAQCVKGMFAFAIYITHGLACYVAIDIT<br>WNDYAKKRFSGDSPRSVFYEYIVRTVLVITLFLAVAIPLNELFISLFGALCLS<br>ALGIAFPALIQCTYWHQRHGWDKTMIVKNVIGVIAIVGLVVGTTTSL<br>KEIVHTFFEEE                                                                                 |
| AaAAAP18<br>(AAEL00947<br>9-PA) | MLPILQMTIAIAIEERQQNGTATNGSLPQGTVNNGFVLDDTAACKPSNGTE<br>VVHHYGPHHGHDDHYYHLHHHHIREKPGHDYTDVITVHGVAHHTKNTY<br>LETMTHLLKGNIGTGCIYAMGDAFKNGGLLATVLTVFIGFVCVHCQHVL<br>LNCAKKVHMDQQDKGRPPDAETVGLCFQKGPFRRLAKPMKMAVNIF<br>ICVTQLGFCCYFVFISSNFKQIFDRYDLVLDVHYHMALLLIPIILTSIITKLLK<br>FLSYCSMLANVFMISLIGITFYALQDVPSISERRYVGENLQLPLFFGTAVF<br>AFEGIALVPLQNMKKPHDFRKACGVLNTGMVFIVSLFTLFGFAGYLKW<br>GEDVQGSITLNLDPGEVLAESVKIMIATGVLLGFALQFFVAIIIMWPPVQC<br>RLNITKHKTLAEICFRILVLTFFIAECVPSLSLFLISLIGALCSTALALVFPPII<br>EMIVAYSEPNCPSRFMIVKNVFILILALLGFFTGSYESLTKIVQELLM                                            |
| AaAAAP19<br>(AAEL00992<br>3-PA) | MMFRDKTGPDLITFRGFTPPPATDDDLLEQRRACSMATESEKPPNDDE<br>HSSSPNLSLFFASLCVIDLFGVFPIVALPKSIISCGLYGIPLVLLVITLQIYTAT<br>VLGRCWTIAEKLDPSIVRKNRYPYAAIAEFTYGKRMSVFVTVLLDMTVFG<br>GGIPNLLVASQNLQLLGSKLTGGEFEFSCYWLMLIGMFLCPIMWLGSPKN<br>MRPLASISVIICSSVAFLTWLSIGEDTFVTNVNGTVVPRDDFEPFKGIELGTP<br>SWIRLLKAYGIIAFQFDIHPMLLIQVDMKKRIGKAVFLGLMATCTLST<br>VTTVFAAYRYGMDTNNVLQILPKSWPLYITILLVTLQLCLSSAVGNSALF<br>QHVEDVLGASRDFTIKRCVIRSSLVWLAVLIAELLPRFDVVMGIIGGTLTG<br>LIFILPPLFYQKMISLEAIYYQEMERIQSRDTLVSTDDREPLFSPDYGSIGPQ<br>GTDTRRPPPPTLHWMGDCFSICHDRFQQFCRFLYSDCILSGAVILFGIGATLI<br>STYYNIFDVKDGTQFWGSCAANITLVSDL |
| AmAAAP1<br>(XP_001123<br>019.2) | MNCLIGDMEQLISNDMLLCTAPSPSSIYNNRNNNRSGTNVISTIFLIVNATL<br>GAGLLNFPQAFDKAGGLVTSISVQLVLLVFITATLILANCSITNTCSMQD<br>MFANFYGQKSFLCAFCIMIYSFGCCLTFLIIIIGDQFDRVLLTYYGFDYCHT<br>WYLSRTFVTIVTCSLFIPLCFKRLDILSYTSSIGCITILYVALLIVYKSFTYT<br>ESSNPMKIWPDNKLEALQIIPICFAYQNHMTAIPMYACMKERNLRKFTLC                                                                                                                                                                                                                                                                                                                    |

|                                 |                                                                                                                                                                                                                                                                                                                                                                                                                                                                                                                                                                                     |
|---------------------------------|-------------------------------------------------------------------------------------------------------------------------------------------------------------------------------------------------------------------------------------------------------------------------------------------------------------------------------------------------------------------------------------------------------------------------------------------------------------------------------------------------------------------------------------------------------------------------------------|
|                                 | AIVSMIICFIIYTVVGISGYATFGIDKVPDILQEYTDKSIILTLGIIIFIAIKNFTT<br>YPIVLYCGRDALLSLLGMDINITIKFRVFITLIWYILSLIIAILVDPDISPVINLLG<br>VLSAAFIFIFPGICLFQCILLKDSELHLNKDRLLIFFAVFITALGAFVSGIIFVE<br>TIEDLSITSKTIPLVTGFRHLNKNLCT                                                                                                                                                                                                                                                                                                                                                                    |
| AmAAAP2<br>(XP_003251<br>042.1) | MLKMISQMSHIMTLANSIIGVSVLAMPYCFKQCGIVLAIVVILSSILSRLA<br>CYFLIKSAVMSRRRNPELLAFHAFGHMGKFLVELFIIGFLVGTCAIAFFVVM<br>GDLGPQIVRKVIDKNPEDIRTSLLVATSIFIVLPLGLLRNIDSLTTLSTATIIFY<br>LCLILKIITESVQHIFAGDWYEHVYYWKPSGILQCVPIFSMALFCQTQLFEI<br>YETIPNVSLEKMNEVVHGALNICTIVYLCVGGFFGYAFCTEPFTGNILMSFE<br>PSLSSEMIKMGFVFSIAFSFPLVIFPCRASLNSLLFRRVYAHEPCVNYLPETR<br>FRCLTIIIVAVSLITGILIPNIEFVLGLVGSTIGVMICLIFPAIFFISISSKHTNERL<br>LAQHILFIGICIMILSTYANLYALEESTNTKILTPTNKPSNQINGLPLNLNKDD<br>I                                                                                                        |
| AmAAAP3<br>(XP_006559<br>952.1) | MSEESEGSSLNRKEEEQPYNQAETGKNEAEKSSSENLEVSRAQISESEELFQ<br>TQEEQYDLTATQIDEPQVFSQDEPYDPYAHKPAKPVSNFKSLATLIKSVIG<br>TGLFAMPNAFASVGLVIGVAGTILIGLLITGCLHILLKIHKMCIRLRPILN<br>YDEVVVATLTTGNKKPWLSSRIATCLVDSSIIMCYIGVGAVYVVFISGIVQE<br>FYDFEGIDHKYIVLILFPFFFVMNMMKYLNDAIISIIGNLFLFVAAVIAVY<br>ALKDGIGGEWVINHNGLYPKFGVTVFFSISPGIMLEVEHDMKKPWN<br>TKFTGVLNHGMMHITLFTLVGVIGYLFKFGPDSNGNFIRNFATNDPYWNR<br>ENREREREGKEGNVLKSFFFCSCPCKATILALVMQALSIYFTYGLQCYMPII<br>ILLDQYIMPGDDDNQPRGKIYLFWNVMIRLIVTFITCILAAIIPKLDLFMAV<br>VGALGTSTLSIIIPAFLYILVHHNNYGLTKWKLVFGLSLLIIVCFITSYVIVV<br>NLTLIIIEFFKNR |
| AmAAAP4<br>(XP_006560<br>541.1) | MENAKEETINMQLIGSESPYKVNNEIAGSGLNASEVPISQTTNVEDYDPHK<br>HRNRPNPTSNAETLIHLLKGSGLTGILAMPNAFRNSGLVTGVIATVIIGVLC<br>TYCLHVLVKAQYKLCRRLRPILSYPLSMKYALEEGPGCVRWFAPYAPGL<br>VDGFMIVYQLGICCVYIVFVASNIKQVADQYWEPLDVKIHMLILLVPLILIN<br>YIRNLKLLAPFSTLANVITFVGLTMILVYMFKDLPSLKEREMFGTLRNFSL<br>YFGTTLFALEAVGVIIALENNMKTQYFGGYCGVLNIGMTVIVALYIVMGF<br>FGYIKYGSNVEGSVTFNLPSEEIMAQSIKIMFAIAIFITHALQGYVPVDIWN<br>TYLDQKIQRKIFWEYVCRILTTLSTFTLAITVPRGLFISLFGALCLSALGI<br>AFPAAIIEICVLWPDRDLGPCMIMLVKNLLLIVFGLLGLVIGTYVSMVDIINF<br>K                                                                  |
| AmAAAP5<br>(XP_006560<br>544.1) | MENAKEETINMQLIGSESPYKVNNEIAGSGLNASEVPISQTTNVEDYDPHK<br>HRNRPNPTSNAETLIHLLKGSGLTGILAMPNAFRNSGLVTGVIATVIIGVLC<br>TYCLHVLVKAQYKLCRRLRPILSYPLSMKYALEEGPGCVRWFAPYAPGL<br>VDGFMIVYQLGICCVYIVFVASNIQDLPSLKEREMFGTLRNFSLYFGTTL<br>FALEAVGVIIALENNMKTQYFGGYCGVLNIGMTVIVALYIVMGFFGYIKY<br>GSNVEGSVTFNLPSEEIMAQSIKIMFAIAIFITHALQGYVPVDIWN<br>TYLDQKIQRKIFWEYVCRILTTLSTFTLAITVPRGLFISLFGALCLSALGIAFPAAIIE<br>ICVLWPDRDLGPCMIMLVKNLLLIVFGLLGLVIGTYVSMVDIINF<br>K                                                                                                                                 |
| AmAAAP6<br>(XP_006562)          | IKCNEEVTRRVNDPNATTGFAGTVELCFATGPLSLRKYSVFMRKLVNIFLCI<br>TQLGFCCVYFVFIKMNKMLVMDVYGIEMDVHQHMAVILIPIMLSTWIRNL                                                                                                                                                                                                                                                                                                                                                                                                                                                                          |

|                                  |                                                                                                                                                                                                                                                                                                                                                                                                                                                                                                                                                                       |
|----------------------------------|-----------------------------------------------------------------------------------------------------------------------------------------------------------------------------------------------------------------------------------------------------------------------------------------------------------------------------------------------------------------------------------------------------------------------------------------------------------------------------------------------------------------------------------------------------------------------|
| 556.1)                           | KYLVVPSSMANFLVIAGYVATMYMMCNDLPSIHERRYIADWHDLPLFFGT<br>VIYSFEGITLVLPLKNEMKKPSNFSKPFGLNVGMVIVGGMFVAMGFISYL<br>KYGDAVAGSVTLNLESKEVVDGKIIKHSSLPQCIQIAISLSILLTYALQFYV<br>PIAIIWPKIVNRFQPFNWPVLSETIFRSTMCLLTFILAEAIQGLFISLVGAV<br>SSTALALIFPPIEMVVCWQNASLGICTISKDILIVLIGLLGFITGTYESITSIK<br>AFST                                                                                                                                                                                                                                                                            |
| AmAAAP7<br>(XP_006562<br>695.1)  | MEKNEKEEQGNPMKEFNSTRKIATIEIEGYNEKDDLYNPFENRDKKNSNS<br>DFGALAHLLKSSLGTGILAMPNAIKNGGVIFGGIGTIIIGLCAHCVHILVRS<br>SHILCKRTKTPQMTYAETAEEAFLCGPKTVRPFANFSRMFVNAALCATYIG<br>GACVYVVVFVSTSIKQLVDFHTGMTIPMRLYILTLPVLLLQVVRNLKFMV<br>PFSIVANLSMMTGFAITLYYIFNDIKIPSHVKPIASIEQLPSFFATVLFVIEGIG<br>VVMPVENSMMKNPHHFLGCPSVLNITMTIVVSLYTVLGVFGYLKYTEDIKG<br>SITLNIPTEDILGQAVKLLIALAVLFTYGLQLFVPMDIMWRVAVKEKCSHKY<br>QGLCHTVMRICISIFTICVALLVPELEPFISLVGSIFFSILGITIPAVVETISCWD<br>GHLGRGKWRFWKNSTLVIFSLALIFGSWISISDIKLYK                                                               |
| AmAAAP8<br>(XP_006565<br>057.1)  | MSHKMLSQGVSVHGGNSQRTPMRPMIAEYDPKKHGKTELSDTVLVKY<br>KCEKNDIPITVTNGSTLPLVERPNDEEAALYNPFHRKLAHPTSDLDLTIHL<br>LKGSLGTGILAMPMAFRNAGLLFGLFATFFIGAVCTYCVHILVKCAHNLCR<br>RTQTPSLGFADVAEEAFLVGPEPVQKYARLAKATINSFLVIDLIGCCCVYIV<br>FISTNVKGVVDYYTETDRDIRFYMAALLPFLIIFSLVRNLKYLAPFSMLAN<br>VLIATGMGITFYIFSDLPSIKDVPNFSSWSQLPLFFGTAIFALEGIGVVMPL<br>ENNMKTPTHFIGCPGLNTGMFFVLLYSTVGGFGYWRYGEDTKASITLN<br>PEQSDILAQSAKLMIAVAIFLTYGLQFYVPMIHWKNVKQYFGSRKLLAEY<br>VIRIVMVIFTVTVAIAIPNLGPFISLVGAVCLSTLGLMFPSVIELVTVWDQEN<br>GLGACYWKLWKNLAIISFGVLGFLTGTYYVSIQEILDENK                   |
| AmAAAP9<br>(XP_006567<br>533.1)  | MQIPLYISEKYKDYAKNDFPNVTTYDSCQHHWRPQIVRKVIDKNPEDIR<br>TSLLVATSIFIVLPLGLLRNIDSLTTLSTATIIFYLCLILKIITESVQHIFAGDWY<br>EHVYYWKPSGILQCVPIFSMALFCQTLFEIYETIPNVSLEKMNEVVHGAL<br>NICTIVYLCVGGFYIAFCTEPTGNILMSFEPSSLSEMIKMGFVFSIAFSPL<br>VIFPCRASLNSLLFRRVYAHEPCVNYLPETFRCLTHIVAVSLITGILIPNIEF<br>VLGLVGSTIGVMICLIFPAIFFISISSKHTNERLLAQIILFIGICIMILSTYANLY<br>ALEESTNTKILTPTNKPSNQINGLPLNLNKDDINANFPNPKILPNIKEEMN<br>KLPDLNVIKNSLNLQVNDIRQEPPP                                                                                                                                   |
| AmAAAP10<br>(XP_006572<br>160.1) | MNRERLPLLFKDVNSDLSLLFATLCVIDIFGIFPIIALPRSIVQCGLYGIPLVFI<br>VLTLLQIYTAILLGKSWIATTIDPQILRKNRNPLAAVTELTGSRARNLITHL<br>DLTVFGCTIPNLLVASQNLQIFGLKISGQQFNLSFCYWLLIIGILLCPIMWLG<br>SPRDMKIISLFSCTMLLLIALLIWWCIITDTRELDIIPITSPSWDKFISSYGM<br>LAFQFDIHPTLMTVQVDMRHPQDINKAVIISFLGNFTMSIVVLIAALQLCLS<br>SVLSHSTLFQDLEDQCNIRNFGWKRCLIRSAIVFLGVAVGESVPRFDIVM<br>VLIGGSLLTGLLVFVFPPLLYSKIIALKTRSKKIRSLIPEVYSSSERCQSSKDMP<br>INPRIHKSIIYGVLSVPRSEYHRYSVYVYNELENELDKIVDYENDIIDSEK<br>FLMIKRIYDNKPIFIDASQSYNIYKQIIPEESISESTTYNYKMWSNCFSYLIV<br>FFGIIITISSTYINMKNTHIYVQFTSPCIMNVITLQNSV |
| AmAAAP11                         | MAHFRGFYIPTLGATFNVAWETLKAKWPENSPCMELIRGSGPDQKQAPGQ                                                                                                                                                                                                                                                                                                                                                                                                                                                                                                                    |

|                                   |                                                                                                                                                                                                                                                                                                                                                                                                                                                                                                                                                                                                                                  |
|-----------------------------------|----------------------------------------------------------------------------------------------------------------------------------------------------------------------------------------------------------------------------------------------------------------------------------------------------------------------------------------------------------------------------------------------------------------------------------------------------------------------------------------------------------------------------------------------------------------------------------------------------------------------------------|
| <p>(XP_392615.1)</p>              | <p>SGHAQFKSFDEGHDNTEMMTMNGDQAYRDQNNVAIAEDSFSYQRNGDK<br/> VRTGVSSSGEFSEYDEGGGEFGSGVKINEWQAAWNVTNAIQGMFIVSLPF<br/> AVLRGGYWAIAMIGIAHICCYTGKILVECLYELDTTGTQRVRVRDSYVAI<br/> AKECFGPTWGARAVNIAQIIHELLMTCILYVVVCGDLMIGTFPEGAI DTRSW<br/> MMLTGIFLLPLGFLKSLQHVSVLSFWCTMSHLFINAIVGYCLLEIGDWGW<br/> SKVKWTIDLENFPISLGVIVFSYTSQIFLPTLEGNLIDRSKFDWMLNWSHIA<br/> AAAFKSLFGWICFLTQNDTQQVITNNLHSAGFKGLVNFCLVIKAMLSYPL<br/> PYAAACELLERAFFRGKPKTPFPTIWTVDRELKVVWGLAWRIGVIVFTILM<br/> AIFIPHSILMGFIGSFTGTMLSFIWPCYFHLKLRNSMEWSAVAYDCVFIF<br/> LGVLFVIGVYDSGSALINAFEIGLPF</p>                                                                    |
| <p>AmAAAP12<br/>(XP_394217.1)</p> | <p>MGNTDSVHDVEMNSLSNADNDRPYIKRTPMRPMIAEYDPKKHGVKTELS<br/> DTVLVKYKCEKNDIPITVTNGSTLPLVERPNDEEAALYNPFEHRKLAHPTS<br/> DLDTLIHLLKGS LGTGILAMPMAFRNAGLLFGLFATFFIGAVCTYCVHILV<br/> KCAHNLCRRRTQTPSLGFADVAEAAFLVGPEPVQKYARLAKATINSFLVIDLI<br/> GCCCYYIVFISTNVKGVVDYYTETDRDIRFYMAALLPFLIIFSLVRNLKYL<br/> APFSMLANVLIATGMGITFYIFSDLPSIKDVPNFSSWSQLPLFFGTAFIALE<br/> GIGVVMPLENNMKTPTHFIGCPGV LNTGMFFVLLYSTVGVFFGYWRYGE<br/> DTKASITLNPEQSDILAQSAKLMIAVAIFLTYGLQFYVPMEIHWKNVKQYF<br/> GSRKLLAEYVIRIVMVIFTVTVAIAIPNLGPFISLVGAVCLSTLGLMFPSVIE<br/> LVTVWDQENGLGACYWKLWKNLAIISFGVLGFLTGTYYVSIQEILDENK</p>                                     |
| <p>AmAAAP13<br/>(XP_395531.2)</p> | <p>MNRERLPLLKDVNSDL SLLFATLCVIDIFGIFPIIALPRSIVQCGLYGIPLVFI<br/> VLTQLIYTAILLGKSWIATTIDPQILRKNRNPLAAVTELTGSRARNLITHIL<br/> DLTVFGCTIPNLLVASQNLQIFGLKISGQQFNLSFCYWLLIIGILLCPIMWLG<br/> SPRDMKIISLFSCTMLLLIALLIWWCIITDTRELDIIPITSPSWDKFISSYGM<br/> LAFQFDIHPTLMTVQVDMRHPQDINKAVIISFLVTGSLFLVTILAVWKYGS<br/> NITANILQLIPGNFTMSIVVLIAALQLCLSSVLSHSTLFDQLEDQCNIKRNG<br/> WKRCLIRSAIVFLGVAVGESVPRFDIVMVLIGGSLTGLLVFVFPPLLYSKIIA<br/> LKTRSKKIRSLIPEVYSSSERCQSSKDMPINPRIHKSIIYGVLSVPRSEYHR<br/> YSYVYYNELENELDKIVDYENDIIDSEKFLMIKRIYDNKPIFIDASQSYNIY<br/> KQIIPEESISESTTYNYKMWSNCF SYLIVFFGIITISSTYINMKNTIHYVQFT<br/> SPCIMNVTILQNSV</p> |
| <p>AmAAAP14<br/>(XP_396451.2)</p> | <p>MDNKAPTEMDTFLPQDGSNAKDGVFKYKVQVAPQDMETGQGDGKSFDP<br/> FSERRVDNPTTDGDTLTHLLKAALGTGILSMPIAFKNAGLVVGFATVLVAF<br/> VCTHCAYILVKCAHVLYYKTRRTEMSFADVAEVAFATGPQWGRKFSKPIR<br/> YLIQISLFATYFGTCSVYTVIVAANFNQIIKHYKEEGSGEFSRLMATCLLIP<br/> MILLSWIPNLKYLAPVSMVANIFMGTGLGITFYLVWDMPPITSVPLFAPIE<br/> DFPRFFSITIFAMEAIGVVMPLENNMKTPQHFGICGV LNKGMMSGVTLIYI<br/> LLGFLGYVKYQDETLD SITLNLPTTEEIPAQVVKILIALAVYCTFGLQFYVCL<br/> DIAWNGIKDRFQKPKMLANYILRTVMVTGAVLLAVIVPTIEPFIGLIGAFCF<br/> SILGLLIPVFVETVTYWDVGFPGNWWALKNVIIIGIMALVFGSRSALIQI<br/> ANLYS</p>                                                                                   |
| <p>AmAAAP15<br/>(XP_624412.2)</p> | <p>MYKYQNAWKPCIIHDSGSESAPLISSGSHISVEPVIFQDSETS DLEYIPTNS<br/> YFKYGSLET CNLHSNITIIPKKSVTENHTLVTS LTLNTESSLNVIQDRCYEIH<br/> NTDLEIVEDTCKDIKSKQSSLV TIFSIWNTILGSSLLTIPWGIQMAGFFPGILL</p>                                                                                                                                                                                                                                                                                                                                                                                                                                           |

|                             |                                                                                                                                                                                                                                                                                                                                                                                                                                                                                                                                                                                                 |
|-----------------------------|-------------------------------------------------------------------------------------------------------------------------------------------------------------------------------------------------------------------------------------------------------------------------------------------------------------------------------------------------------------------------------------------------------------------------------------------------------------------------------------------------------------------------------------------------------------------------------------------------|
|                             | ILIMSGLCLYTAYCLLLVYNYGGEQKNIEVIQLCQIYLNKWAHEYVAKIFSIT<br>VLLGATIAYWVLMNSFLYNSVNFYDSVVKVSQFPIIDNTSFTSEVLCPKKI<br>TYNSTNFIMHDYTYSTLGPLWDLYKTVPIFLGLLIFPLNFNSPTFFAKFNS<br>LGTISIIYLIVFILIKSYSWGINMNEIEWKTSWTLKFSFPALSGMLALSFFIHN<br>IIITIMQNNYDQSKNGRDLSIAYLLVTLTYITVGIVFYVCFPLNKSCIEDNLL<br>NNFQKWSGLTVGARIVLLFQLLTVYPLLAYMLRIQLLTSICKIFNTGCVIIN<br>IILVSVCIFFAVFVPIYIGTIIRYTGALSGFIYIFTLPSLLYLVLKEQKKLTFSLF<br>LHISILIFGFLNLLAQFFITEY                                                                                                                                                            |
| AmAAAP16<br>(XP_624573.2)   | MSHDNLGFTSSTDTLDTKRWSSSRSNQNGYDPTHNKSNIYVLELEEKKS<br>VQEEYEEDYNPYEHMVAHPTTSFETLLHLLKGS LGTGILAMPRAFYHAG<br>YGIGTVATIIIGLFCYCMRILVSSEYELCKRKRVASLSYPATAEAALAVGPM<br>PFRFRSRAVHTINLFLMVYQLGTCCVYTVFIATNLKMALKTYVSDIDLRL<br>YMLAILLPLILVNWIRNLKFLAPCSTVANFITFIGFIILYYIFREPLSFENRD<br>VIGNVENFPLYFGTVLFALEAIGVIMPLENEMKKPKVFMKTFGVNLIGMG<br>VIVALYTGMGFFGYIRYGGAIEGSITFSLGEPLALANAVQILLAI AIFFTHP IQ<br>CYVAIDIIWNEYIAPNLEKNSHKLLEWEYVVRTSLVLLTFLLAVAIPQLDLFIS<br>LFGALCGLGLAFAPIIQTFTWTVCDRTERSIMVAKNMSLVLFGLGLIV<br>GTYTSLRDIIKTFS                                                                |
| ApAAAP1<br>(ACYPI000092-PA) | MVESGNMAKEKWKSDCVNIRSNGRTEQIKRENAEHRLSILSIVYNPTAHP<br>TSYLDTLVNMLKGNVGCILAMGDAFKNGGLFLSPVLTFFIIGICVYNQHV<br>LVQCSKSVKQKLKLQHNQFAETVELSFETGPQRFQSYSVFRNSVNSFIVI<br>TQLGFCCVYILFVSKSIQQLSWYNIQLDVHVSILISMVPIMISSLIRSLKFI<br>ARLSAIANVCMLVGLVVILYYCTVDLPLSSRSAIAHWTIPLYFGTSIFSFE<br>GISLVLPLEQEMKKPKQFSTAFGLVNVGMVIVTSLIVLTGFMGYWRFGDA<br>VRGSLTLNLPEEFLLSKVVISSMMFGIICTYTLQFYVPVEILWPKVEQRFGP<br>FRSPLLWDTGLRVVLVITFIAADVPHLSLFISSMMGAVASTFLALIFPPLCH<br>MAVTSADDGGNGYGLFNWRLAMNCVTLVLGALGFVTGTYASVYEIFGA<br>FQKVAITAAVTNTTGNNYTAPGVH                                                             |
| ApAAAP2<br>(ACYPI000153-PA) | MIYADFGQPAMEEEGQPRGFQIRGHLVHGIPRVGDSNYDPACPTCNPGSIN<br>DTVTPTAVVVSSPPAIVTTAVAVPGPIPATNDYNYNGPLQHEIGPMAALRQN<br>GGMLTRTDDTYSFSGFITGIAVVFVSGEMAGIGMLAAPWAVVNLGWLGF<br>VLLITFGIATAYSACCLGTCWLILEERYAQYRIYPIPDYPTIAMHAVGRRTS<br>YATRACISITLFGSATVYLMLIAQTAQKFLGSHPEVEFSTWLFVFSVSLSS<br>LMFLESPKDYIYVATGAFLTMTSSYFIIMQMLLDERIQEGSATDTQKSVPA<br>NQFFLSFGTILFAYGGAASFPVINFMFKRDEFSSHVVASFILLTILFSSVVV<br>GGYIYGHNTINPNIIMSLSDSWVSYAAVILMAGHLVLGFVIMAKPVTEQAE<br>SFLSSTNGFSVQRFFVRICVLLAMIFVGECPNFISSLVALIGCSTVILATFVL<br>PSVFYLRCAQQSATWPDRSLPWKSKLYMYTIILGLSSGLGAMFTALSEL<br>FDLRSLIPHYYYYYFYDLDYPSLS |
| ApAAAP3<br>(ACYPI000333-PA) | MGRVSKKSFKRSSRPRAKSMITDCEIQPLLNTELSRTSIADNGFIFKYDSEN<br>SDLENNKAPTTQSKANELLYPYLRSFSLDYDILNRPKFYRKLQPYIPLGD<br>TITNEPYTQNSIITIFAIWNTIMGTSLLAMPWSVERAGLVMGLILMFVIAAL<br>CLYTSNRILKVQVLHGNDTGEVAQLSKKLLGPWAEVIAKLFSEIILLGANIV<br>YWILMSNFLYYSVGYIHDLLFADENTGAFEFNTTNLICPNSADFNATSDT                                                                                                                                                                                                                                                                                                                |

|                                 |                                                                                                                                                                                                                                                                                                                                                                                                                                                                                                                                                                                                                                                                                                      |
|---------------------------------|------------------------------------------------------------------------------------------------------------------------------------------------------------------------------------------------------------------------------------------------------------------------------------------------------------------------------------------------------------------------------------------------------------------------------------------------------------------------------------------------------------------------------------------------------------------------------------------------------------------------------------------------------------------------------------------------------|
|                                 | TRQLTYERIWDLNTTVPFLVIVAPLLNFRSATFFTKFNSLGTAVLYLFIF<br>VIIKSYSWGINMSAPTEGLTDYSEFYKNTFPATSGMLTLSMFIHNIITIMR<br>NNENQKHNGRDLSIAFTLVLLTYLLIGITFYVCFPLAKSCIEDNFLNFPRT<br>DVFSIARVFLFFQLLTVYPLISYMLRVQVFAALELSIYPSVLHVIALNCFVIF<br>ICILFAIFMPHIGTVIRFSGAICGFVYIYTLPTMLHLASQRRRNLLTFGSVIFH<br>VSISLVGLANLIAQFFV                                                                                                                                                                                                                                                                                                                                                                                             |
| ApAAAP4<br>(ACYPI0005<br>36-PA) | MKHTVNSNGQGADGNNANDGDGNVGTQGWRRAKGGKKQLPYDPFQM<br>RDNSNSTTATGALLHLIKSSLGTGVLAMPNAFKNGGLIFGLFGTAAIGALC<br>AHCYLLVVCQSLSARRTRPALGFADTAYAAFKTGPHRFRAWAAFARGF<br>VNAALFCTYYFGNCVYVILISASFQVADNHLPEEWHLSIRTWILGLALPI<br>LPLGIIRSLRVLPFSAVATTFILVGLGCSMAWVVIGVSPFSSKEAVLAAVPL<br>PDMASRPWVGTAHMPFFSTVVFAMEGIGTVLPIENSMRHPEHFLRARP<br>CGVLNAAMTLVVFLYSMAGFLGYLRFGNSTEGSITLNLNDLYVFLVPA<br>ETVKITVTLISILFSYGLQFCVPSEIVWARLRPWLRKRKWDKAYSLPATDKD<br>TSTVAVSTIAGSIVTMTTSTMNHTTNDKQTEVEELDEQENFVEWEY<br>YVMRALMILGTCTVYSHLFVIFITVIAAIVPNLAPIISLFGAVFFSILGLMC<br>PAVIHLVAFWEYNNEHENSENDESDSENDLRFDGVDNYAMFDDMSIVC<br>GDNTQRQQRRMNDESSTKNKGMSRITATKDIAIASLAIFAMVSGAYAS<br>LVDIFQSYGFSKEHTINSTIEIITTTIGPGPESAFLLIK |
| ApAAAP5<br>(ACYPI0005<br>50-PA) | MTDSMTRNFNNYPSTAKPEQHVSKQQMAAADCYDNQGMRLSELDINGK<br>PVNGNTCINMDSLNNRCVGINIKGDTATQLNEKQNFYNPYQHRDVKHPT<br>TYFDTLIHLLKASLGTGILAMPFAFKNAGYVVGTGLGTHIIGILCTFTIHLV<br>ASHEL CIRRKVPSLTYPGTVAAAFEEGPKFTRILAPYARMMTNMFLVLYQI<br>GSSCVYVVFIA SNLKVVGDAYLGGNTDVRMYMVYIPLILISWVRNLKL<br>LAPFSSIATCLTVVSFTLIFYIFREAPSFTDREPVGTVKSIPFFGTVLFAME<br>AIGMVLPLENEMKNPKKFGSVFGLNASMLPISTLYLIVGLLGYLKYGDK<br>TTGSITLDMPQTEVLSQVVKLLLSASIYITYALSNYVAFDIVWKGMEQKM<br>EKNEHRICWEYALRTSIVIVTFFFAIIPNLEHLISLIGAFCLSSVGIALPAIVS<br>FLTFSDVYKNEGNIQYGLFCLRNLLIILIAIFAFVIGVSTSVSDIIHMT                                                                                                                                         |
| ApAAAP6<br>(ACYPI0006<br>27-PA) | MRAHVMTLANSIIGVSILAMPFCFKECGIVLSTLLLVLNSLMSRASCHFL<br>KSAIKSRTRDFEFLAFHLFGKLGKLTVELSIIMFLMGTCIAFFVVMGDLGP<br>QIIGNTFNIKNTAALRPSIMIGLAAFVVLPLGLLRDVNSLNTICTAAIIFYAC<br>LVFKIFIEAFDKLFSFVWVSEIYFWKPVGLFQCLPIFSMSLFCQTQLFDIFET<br>ITNESLTKLNAVIRSSMNMCSTSVYISVGILGYIAHYDSVLTGNILTSFSQCLS<br>SDIIKIGFVMSIAVSFPLVIFPCRSSISLIATKDYVLVSGGRQHIAETPFKCIT<br>FFIVLFSLVGTLLMPNIEVVLGLIGSTIGVMINVMFSPMFLVRVANKSPKER<br>FWARFIFVGFIMVMGTSANLFAIQQTFTNTKTVHREAESLNFKPMDTHH<br>DIINPKLKTSEEIRVEPPIPVEPIIKSNVDVKQEKSVKVENGNTISKDAINKE<br>DEELEKRPEIELLEKLSHEKEEKILAESKKILEELK GARQVQFEKNRR<br>PVNNVKDLNFSMNKQEVKKNDISLDEKKNQLVKDKLPLPLVKEANRPN<br>KTKMETIRDKRDLTSTVHSNNEEKEENC DKNEKSVNEDVPRVKHVDNID<br>NIENISISN    |
| ApAAAP7<br>(ACYPI0010)          | MSHHFAGAGDVGVP LKSTVGVGIPVSAEDILQTFDNDERKLQVCGSMRP<br>IITELDNKRGSIRTDVADLMVKYKCSSNGVPITQTNGSTLPLVPGSSKD                                                                                                                                                                                                                                                                                                                                                                                                                                                                                                                                                                                              |



|                                  |                                                                                                                                                                                                                                                                                                                                                                                                                                                                                                                                                                                                     |
|----------------------------------|-----------------------------------------------------------------------------------------------------------------------------------------------------------------------------------------------------------------------------------------------------------------------------------------------------------------------------------------------------------------------------------------------------------------------------------------------------------------------------------------------------------------------------------------------------------------------------------------------------|
| 18-PA)                           | AEFGGYNPFDHRTVQYPTTDMETFIHLLKGSLSGILAMPLAFMNAGLIF<br>GLIATATIGFVCTYCVHILVKSSHKLCRMVQVPALGFADVAEVAFLAGPPAF<br>QKFSGLFRGLVNTFLTIDLLGCCCVYIVFVAKNIKQVMDEYVLDINVRWY<br>MLMMLPLVIAMNLRNLKYLAPLSMVANFLVGTCTITFWYVFQDLPPM<br>KSAPFITDWHKWPLFFGTAIFALEGIGVVMPLNNMKTPQHFIGCPSVLNI<br>GMAIVVLLYSTVGMFGFLKYGDKTEGSITLNLPKDELLAQSVKVMIAVAIF<br>LTYSLQFYVPFEIHWKGSKHRFTSHPVLFYLLRVLLVVGTVLVAIACPNLG<br>PVISLVGALCLSFLGLILPSCIDLVTWCWEEPGLGRGYWRLWKNMVIIMFGIL<br>GLVTGVYSSMLDIIVTFNQ                                                                                                                              |
| ApAAAP8<br>(ACYPI0013<br>66-PA)  | METDKLNDRENKTNGDAQFAVVEMGELNHCSRSTSGENKRSGYLVTLM<br>HFIKGNIGCGMLAMGEAFKIGGLYLTLFILLYVWLISVYNMHVLTTLRKY<br>QNRLQAKRAPSFGDTVENAFKMSDKWIFRSISNNIRKIVFYNILITQLGLCS<br>VYILFIGTSLQKLLQYSYEINIQTVLLTmplimvcaslrklrFIAPLSTLA<br>NFALITGVITIMYYSKSGPSSKGVRSYSKWTELPTMFGIIMFSFEGIGLVL<br>LFAEIEDSKKFTSSFGVLNFGMVAVMMLNVPLGMTGYSKWGDDVKSSLT<br>LNLPHYDHELTQFVILMMLGIACSYALQFYPAAVIVYSLEKIYGFNHPAV<br>WDYSIRICICLVTYLAASTVPHLDLDFMSLVGVTCTVALTMIFPALSNLAFRT<br>KDKGSFFGSFFDMVTILTAVIGSVTGIYANTTAIYEAFSQNHSNG                                                                                                   |
| ApAAAP9<br>(ACYPI0016<br>84-PA)  | MMGSQGVPELQSFLLDDKSKMKEVPPQTKRKSSKNQEKSEVANLNGIE<br>YFDPFLERNLEHPTTNGETLTHLLKASLGTGILAMPQAFQCSGLITGIFATV<br>FVSFVCTFCSYSLVKCAHTLYRRTRVTAMGYADVAEVAFANGPAWSRKFS<br>SLTRQLVLWLLFVTYFGTCSVYTVIIASNFELFAHHMGYALNLRIFIAMLL<br>LLPLILLSYVPNLKYLAPVSMVANLLMSVGLGVTFYTYLNDIPSISDRPAV<br>GSLETFTFFCLTVFAMEAIGVVMPLNNMKTPRKFLGVFGVLNVGMGG<br>VTVVYILLGFLGFLKYGDETKSSITLNLPTEDAAAQVAKICISLAVFCTYGL<br>QFFVCLEIAWTKIQENFEKATIYHNYVLRTVLVTLVAVAVPTIGPFIGLIG<br>AFCFSLGIIAPMIIEFATYWDQVTVWMTIRNAVLISVGILALVFGTSNSVA<br>DIITAYVPPELIPINATGTRTAAQ                                                                   |
| ApAAAP10<br>(ACYPI0027<br>42-PA) | MANFGRFYVPPFGAAMNVVWAAVKAYVPEDSPCVEAIMKRRGDRAAAG<br>AASAGTGTGAADGVDAERNRLQGGGKPDTPNFRTTCNSELSSYGGVEKR<br>DGGVDGDGVTKRTPQAFSMDDGSFDEDSSGGGEFGRGRHKIDEWQAAW<br>NVTNAIQGMFVSLPFAVLRGGYWAIVAMIGIAYICCYTGKILVECLYELD<br>LNTGQRRVRVDSYVSIARDCFGPVWGARAVNVAQMIELLMTCILYVAC<br>GDLMEGTFPDGVIDTRSWMMITGVLLIPLGFLKHLHHVSLLSFWCTMSHI<br>VINIILGYCVLELPDWGWSKVKWTIDVENFPISLGMIVFSYTSQIFLPTLEG<br>NLSDRSKFDWMLWESHIAAAIFKSLFGYVCFLTFQNDTQQVITNNLHSPA<br>FKGLNVFLVVKVLLSYPLPYAACDILEKSFFIGPPATLYPSIWHVDGELK<br>VWGLAFRVAIILCTVFMAISIPHFAILMGFIGSFTGTMLSFIWPCYFHLKLG<br>GDSLEWRTIMFNCVFIFLGLFGVIGVYDSGTAIKAFQIGLPF |
| ApAAAP11<br>(ACYPI0041<br>84-PA) | MCSTNSSQEYLVAPSKDGMDETSYILQRRRQQQVMDGGDNLKNCPKFA<br>SFNYINSIIGSGVIGIPYAFNLVSGVGMGVILLALVAIVTDYSLVLMLSAHIS<br>GSFSYQSLMKSAFGRYGFVLSFLQFIYPIAMISYNIIVGDTATKVLIRLFS<br>LPNDSVFAQRYFVIAMATIFITPLCMLRNVARLAKASIVSFIMVLVIFVTV<br>IRYESLHDVMSTVTEVGNINTWDFARPGAIQAIGIMSFGFMCHHNVFLLY                                                                                                                                                                                                                                                                                                                       |

|                                  |                                                                                                                                                                                                                                                                                                                                                                                                                                                                                                                                                                                                                                                                                                                                                                                                                                                   |
|----------------------------------|---------------------------------------------------------------------------------------------------------------------------------------------------------------------------------------------------------------------------------------------------------------------------------------------------------------------------------------------------------------------------------------------------------------------------------------------------------------------------------------------------------------------------------------------------------------------------------------------------------------------------------------------------------------------------------------------------------------------------------------------------------------------------------------------------------------------------------------------------|
|                                  | DSIEGASQTIWNCVTHVAVTISFLLMVAFGLVGYATFGDLTQGDLLENYCW<br>NDDLINISRLLFSLTLLTFPLECMVTKAVVDQTLRGGTDPVPMSSKKRHAI<br>TVSILMATYFVSISTKCLGIALEINGVVAAIPLAFVLPAAIYIKISNDSWKEKI<br>PAYCLALFGTIVAASGISLVVYEILTFTADSCENDRIMDHCNINDTYLPTGDI<br>IQLPLN                                                                                                                                                                                                                                                                                                                                                                                                                                                                                                                                                                                                           |
| ApAAAP12<br>(ACYPI0043<br>20-PA) | MVEVQSQTGSPKPMVIRRCTEVPAMAGSPTASEMTRRRRRRRLMSNAS<br>SVVSAAAAGIPASEKHKISNNEALMHLVKATIGGGFLAMPEAFHNIGIVM<br>GVIGTSILGLSVLNMMS CIVRCSQTMRS GKYVDIILAEQNGKKT VGN GDD<br>DGNNGSKQLARQRHSNELVLP SMDYPDTVANVLKYRAHGRFARFAS FAR<br>NFTSASLVATYYGVNIYVCIVSSTSKQLIDQYTSEASEDSWSHSLHG SIRW<br>YPIIISVLILPVG MIRLMKYMVPFSVAANACMLSGTVAVFYFIVFGDGSQDP<br>IPPEEQAKLVVWPATRWTLFAGSS LCSLESVGM LLIENAMSRPLELAGPP<br>YTLHRSVVVIIIIMNSVLGLFGYLR YGDQCAGSISLNL PQDNHLSQVIKMMI<br>AAGILLTYGLQLTVTTDLAWQGLRSKVVKSMGGSDSDDAEDDDFRQK                                                                                                                                                                                                                                                                                                                                     |
| ApAAAP13<br>(ACYPI0055<br>19-PA) | MTTEINGDFSINDNHIKVQAAKPAQVNC DKMTLKT SRVNEDKPLLTGTAT<br>LYNQNGSNFLSPTARTLPDTNISSGPMNESLEKNVANGGSTSDYNPLLNRQ<br>LENPTS NFDTMIHLLKGNIGTGILAMPDAFRNSGWV VGLVCTALLGAVCT<br>HCMHILVRCSHEL CVRTQRPSLSFPNVAEMAF EYGPPKLQKYSSAASKFIN<br>TFLVMTQLGFCCVYFLFVATNLQEVITHYFSVKLSVQSYLLILLVPMILLNC<br>VKSLKYLTPASFVATILTVIGLGITFFYLLQGLPKT LSVKAFSSWQQLPLYFG<br>TAVYAFEGIGMVLPLENNMKNPESFGGMTGVLNTGMVIVTCLYTSIGFFG<br>YLR YGEAVKLG SITLNL LKISQSVRAAMAFSIFLSYGLQFYVPIGIVWPAL<br>KGYFHSQSSQRNAELSIRVFLVTLTFALAAAI PNL SAIISLVGSFSSSALALIF<br>PPIIELMTFWDHCSGKEFTLMFVKDIIIIIGFLGFGFGSYASLWNIIEPISS                                                                                                                                                                                                                                                                |
| ApAAAP14<br>(ACYPI0062<br>58-PA) | MDNPAAVLSDDVEDWTPRAPSTGSNQ P QARLSSNTPNNSSQTQSPTPHQ<br>KQQFQQPTPQQQYKRNASTYSIDIPATLGLMVTNTNPAANGGSTTSSTMK<br>LTEYSSSGSNSSNSG SVGDGTATATS YIISGGNGEKADGNMVGGRRRKG<br>GKKQPRYDPFQMRDKSKATTD SGALLHLIKSSLGSGILAMPNAFKNGGLI<br>FGLVGTAAIGTLCTHC IYLLV LCSQTLARRTRR PALGFADTAAAFSTGPR<br>RFRAWAPFAREFVNAALFCTYYFGNTVYVVLVAASFQVADTHTPPEWH<br>MPIRAWILGLAIPLVPLGIVRSLRLLVPFSAIATAFILVGLGCTMSWVVTGVS<br>LFADESALTA AVPLPDIGSRPWIAPVGHMPLFFATVLFAMEGIGTVLPIENS<br>MRHPQRFLKARPCGV LNAAMVLVCLYSVAGFLGYLRFGDATDGSITLN<br>LPNDLFAESVKIMVALSILFSYGLQFCVPSEIVWTRLEPWLRKRRQNSKYS<br>ADTKTATSCGAPVNTIAGSTISTVTA VTTTSATS VDEKKQLELESNLQDKP<br>MEGAYYVMRAAMILGTVFIAALV PDLAPFISLIGAVFFSILGLMCPAVIH LA<br>AFWNHGDEDEGEETDDATDSEDDLDFDGDY YAVDDDDTDLEAVQRQPQR<br>RSSGRSTRRRRKGMSRWTVAKDVAIVMIALIALVSGTYASLV DIVAFY GAG<br>GEGGHHA AKNGTAVTVGTTTIGPGPES AFLVAANVVPQL |
| ApAAAP15<br>(ACYPI0076<br>81-PA) | MGSQGTEPVLQS FLLVEKSKMKEIPRNLRKPSNILEKGEVAHLNGIDYFDP<br>FLERSLEHPTTNGETLTHLLKACLGTGILAMPLAFQCSGLITGIFGTVFVSL<br>VCTYCSYLLVKCAHTLYRR TKVSYMSYADVTEVAFANGPQWSRKFS SLTR<br>QSVLWLLFVTYFGTCSVYTVIIASNFEQLFTHHMGYELNLR YFISILLIPLIL<br>LSYVPNLKYLAPVSMVANLLMAAGLGITFY YTLCDVPNISKRPAVGTLET                                                                                                                                                                                                                                                                                                                                                                                                                                                                                                                                                             |

|                                  |                                                                                                                                                                                                                                                                                                                                                                                                                                                                                                                      |
|----------------------------------|----------------------------------------------------------------------------------------------------------------------------------------------------------------------------------------------------------------------------------------------------------------------------------------------------------------------------------------------------------------------------------------------------------------------------------------------------------------------------------------------------------------------|
|                                  | FPTYFCLTVFAMEAIGVVMPLENNMTKTPRDFLGLFGVLNIGMGGVTIVYI<br>MLGFFGYLKYGETTKSSITLNLPTEDIAAQVAKICISLAVFCTYGLQFFVCL<br>EITWTKVQKNFEKATVYHNYILRTVLSLSVAIAVAVPTIGPFIGLIGAFCS<br>LLGIIMPVLIFFTYYWDNITVWMIVRNAVLIAVGLMALIFGTINSITDIITVY<br>EPNATQTVNSTMNSTLIHSTTQ                                                                                                                                                                                                                                                                |
| ApAAAP16<br>(ACYPI0088<br>49-PA) | MGDKSRKNSATQDVEANGTTDQQQQVEAVAKAVHGHVPVSEHPTTYCETL<br>MHLKGNIGCGMLAMGDAFRNGGLLMAPILTVFIGTVCIYNNHILLNVAH<br>KLLKSRKLEHCPTFSETVELSFATGPKSLQKHADLFRRTTVNVFVIITQLGFC<br>CVYILFVSSSIKQFCDEYGTVLDIHHMIFALVPIMSCAMIRNLKFIAPLSTA<br>ANISMAIGLGIILSYCVVDLPTLNSRTAVAHWSQIPLFFGTAIYAFEGISLVLP<br>LQLEMKTPNRFASMTGVLNVGMTIVTFIILTMGFVGFWRFGDDVKGSLTL<br>NLPPTLILSKIVVGLMVFAICTYTLQFYVPVAILWPSVQEKYGPFPSPALA<br>EYLLRAVLVAFATFLAAEVIPHLALFISLVGAIASSTFLALIFPPICHMVWVKDE<br>GFGAFNWKLHMDIITIVLGLLGFVTGTYFSLHDIIIVAFSKDFGFH         |
| ApAAAP17<br>(ACYPI0089<br>57-PA) | MSKKKEISDNKLRPFKCQEKSEVAHLNGIDYFDPFLERNLEHPTTNGETLT<br>HLLKASLGTGILAMPLAFQCSGLITGIFATLCVSFVCTYCSYLLVKCAHTLY<br>RRTKVSSMSYADVAEVAFANGPQWSRKFSLITRQSVLWLLFVTYFGTCSV<br>YTVIIASNFEQLFTHHMGYELNLRYSIFISILLIPLILLSYVPNLKYLAPVSMVA<br>NLLMATGLGITFYTLCDVNPISERPAVGTLETFTYFCLTVFAMEAIGVV<br>MPLENNMTKTPRSFLGVFGVLNIGMGCVTIVYILLGFFGYLKYGEATKSSIT<br>LNLPTEDLAAQVAKICISLAVFCTYGLQFFVCLEIMWNKIEETFERTTILHN<br>YVLRVTVLVIASVLIAVAVPTIGPFIGLIGAFCSLLGIIVPLIIEFATYWDEVTV<br>WMTIRNLVLIVVGVLAIVFGTANSIADIIAAYDPAQAVECVINSTLPQPIAE |
| ApAAAP18<br>(ACYPI0089<br>71-PA) | MSELSLGTGIGPPSDTKDQKSKSYAVNVQQENMSLNLNANGSPPYDPHAHRIL<br>EHPTTNETLIHLLKGLGTGILAMPNAFYNSGLLVGTGTVGTLIGFLCTYCL<br>HVLVRSQYLLCKKHRVPILSYPDMSKYALQDGAFLKFGVPLSAIIVDGLFI<br>VYQLGICCVYIMFIGTSIKQVLDIYIEPMNERYYMLMMLIPLVAINLIRNLK<br>LLAPFSQGANIITFAGLAIVLWYIFVDLPPISSRPLIGEPRNYTLFVGTTLFAL<br>EAVGVVLALENNMKTASFGGTTGVLNIGMTIITVMYVGMGFFGYVKYG<br>EIVEGSVTLNLPNGDILSQAVKLIFAVAIFITYALQAYVPVEIHWNTYMKKR<br>QNWDKTTMEYLLRISVVLVTFLLAVAIPLLDLDFISLFGALCLSVLGIGFPALI<br>EICVLWPERNFGRFNYVLIKDIILIIIGILALVLGTYISLQDIARKL       |
| ApAAAP19<br>(ACYPI0097<br>36-PA) | MIADSSGLTVPFAILCIVDLFGIFPIVVLPGPIKCGWLGIPLAIGVFAIQVYT<br>AILLGKCVIIAEEIEPNIVKKNRYPYAALAEFIGNKVKRIVTVMLDVAVFG<br>ACIPNLLIASYNLHILGIKLSSEFRDVSPIWLVIGIILCPPLWLGSPKDMK<br>WIVSSSVFFVGSVSVLTWIAMYDTQREIYAPIPEPSWNSVALAYGLLAFQF<br>DVHPLVTVQMDMVDKRLPVAIICAFITCSLFLITTVIGYVRFGSLLSSN<br>LLDQLSNSYILDVNITLVTIQICLSTAVSTTALFQHIEHFLKIPKEFNRRRCVL<br>RSCIVMLAVTIGEAVPRFDLLMGLVGALLTGPLMFLPLFYIKIRSLRRLKI<br>KKSEGVCYRTFPNAKLTPIVGFKRLALLIFIILAGTLATVLSVSGIRDTHIYA<br>KFTPSCIMKLFE                                            |
| ApAAAP20<br>(ACYPI0805<br>26-PA) | MIAYYYGMRFIMILGSIMVAVAVPDIGPLVSLVGSVGFSLGLIVPVIMETV<br>WYWSEEDDDWNGAVTASATTVTTSETTVTDAGTTSTTVNDGSALTA<br>VAAGEGERRLMIRGGGFRAIRHLKNLILLLLGLMALVGGAFYNIRDIVSR                                                                                                                                                                                                                                                                                                                                                          |

|                                 |                                                                                                                                                                                                                                                                                                                                                                                                                                                                                                                                                                              |
|---------------------------------|------------------------------------------------------------------------------------------------------------------------------------------------------------------------------------------------------------------------------------------------------------------------------------------------------------------------------------------------------------------------------------------------------------------------------------------------------------------------------------------------------------------------------------------------------------------------------|
|                                 | ASGDGSPAPTI                                                                                                                                                                                                                                                                                                                                                                                                                                                                                                                                                                  |
| ApAAAP21<br>(ACYPI2621<br>2-PA) | MSDGDVGITNSCDDTSTESNMVSKPQSSSTLSSGLLSCTSQTSSSLMMQNF<br>LNYDPPSLTSDDTYYSSFTYFVRSRISGLGFLCLPHAFKQVGVITGLALCFIA<br>GLMFTYTFTTLSADCAVSELDRVQLGMWPESNLQMVFNFFKLLTEMGFS<br>VNFNVSLSFEIVCLIFLLLPNGNYLTPLNLLSNITCTALLSIIFYNIFTSDMNI<br>DRETLMCGNWDVDFQFFGILLFTFIPIVQVFKIEDGSIRKNDIAWPLKLLN<br>TSMIILTNMYIAIGLCGYLDQQDVPIFGVLILKFMPAIRCRTIVKTCVALNVT<br>IFHRELVESTVLWVPSIMVNNVKNDKMGQPPSAVKYSPVMIAGMTAFT<br>KILFTFCFFVTTVVASPVTSDFQVIVALIGYLGACNMMIYPFIVEMCVTY<br>ALYGMSTGRYVIFKDVCLVLLGLSLFACGTSMLVVCIIHGHGD                                                                         |
| ApAAAP22<br>(ACYPI4429<br>7-PA) | MVSRSKTSPLSCTLKSSSPMMQNFLNYDPPSQISDDTYSSFTYFVRSV<br>GLGFLCLPYAFKQVGVITALALCFIGGLMFTHSFTTLCRFRYKLCMHRVP<br>TVPYQNLIEYSLACGPICRWSTFLRFTFIATNLTNFGKSCLYMKFVSLTIY<br>EFLTEMGFSVNYFNVTLSFNVCLLFLLLPNGNYLTPLNFLINIACTGLLSL<br>LFYNIFTSDMNIGCQTLICGNVTDVQYFGILLFTFIPIVQVFKIGDRSIRKN<br>DFAWPKLLNMSMVIITNMYIAIGLCGYLDQQNVPIFGIPILKFMPAIRCRNI<br>VKTCVAINVTIFYRELNESTLLWVSSIKVDKSDNKMGNPPSTVKYSPAM<br>FAGLTAFTKILFTFCFFVTIIVASPATSGFQAMVALIGYLGACNMMIYPYI<br>VEMCVTYALHGISTRRYVIFKDVCLVLLGLLVFCGTSALVLRIIIHGD                                                                         |
| ApAAAP23<br>(ACYPI5319<br>8-PA) | MDRPAEKKDKISNASALMHMIKSTIGGGFLAMPEAFHNAGLLVGSIGTM<br>ILGVAVLNMMSFIVRISQKLRSGKYAAAILAEKNKNNDGTERKHDGEPIDI<br>NSSELVLEPMDYPDTVEAVFKYGGGRFASWAPFAKKLTTVSLIVTYYG<br>NIIYVCIVASTTKQLVDIHTKDESEMGLWYALHGLNVRWYPLFVALLIIPM<br>GMIQLIRYLVPSVIANGLISAGTVVLFYFIFTDDNGRNPLNAEERAKLVV<br>WPMTRWTLFAGSALCSMEGVGMLMHIENSMKKPRELAGPPGYTLHWSM<br>LIIVILNGALGFFGYIRYGERCLGSVPLNLPDNLSEGVKIAVTLGILMTY<br>GLQLTVTADLVWQWLKRRSDTNVFPRTGSATQEVSEMNNQYKLMRFLII<br>GTVIVATIVPDVGPMSLVGSGVSVLGLLVPAALETVWYWDVRSEEDYSE<br>LDVDLEFDGIGLASAAALTSRDDNLKMRKIGARRTLRHIKNFIYVILALSA<br>LAGGAFYNLREMFALVPDHT |
| BmAAAP1<br>(NP_001243<br>940.1) | MSKNGLEEPSGSQPTPKETTPLITKGGENGNGGKNGGLSVGQTSMLIAG<br>EMAGSGVLALPRALVRTGWIGVPIIILMCLVAAFSGKRLGDCW TILEERNP<br>QLRSRKRNPYAIADQTLGKTWSVVVSMIIVTLFGASVVYLLMAAQIIEQ<br>LLTLIPTLTICTWYLIVVGAMTPLIFFNSPKDLTFTGVIAFGSTVIACILYFIE<br>MMNEVRPFVFRWGVHGFDFFLAFGTIMFAFGGASTFPTIQNDMTDKSQF<br>GKSIQYSFGAILLLYLPIAIGGYAVYGESVGSNVALSLSATPLTLVGNIFMAI<br>HLVFAFIILINPVCQEMEEIYNIERDSVGWRVLIRLSIMGAILFIGESIPRFYTI<br>LALVGGTTVALLTYILPSFCYLSLINQTPREGQTPPETPGWVKLLCYEVIAL<br>GVLGAVAATYSGLSAVFSSAVTTPCYLR                                                                                    |
| BmAAAP2<br>(XP_004924<br>910.1) | MSWRPDNTKNDMSKRISSSSIYSNRGSLSTNLNQYLDFERDSSVATYELYP<br>GTETDNYDFTVERHSPLLYNLFESTAYLIKGGAGILNVHVAYMFAGLWT<br>SLVVTVMGGIICRCMMLLVKSAHKMYVLLRVPRLYADLVEAVVAIGPL<br>KKLRNYSKTLRYFVDICLFVQMCCTCCIYEIIIATLKKVLEAVSPSLSHQE<br>LHLRIYVMITMVPLIAVCLIRNMRYLAPFSLADLFIGICMAIALYYGMSST                                                                                                                                                                                                                                                                                                   |

|                                 |                                                                                                                                                                                                                                                                                                                                                                                                                                                                                                                                                                                       |
|---------------------------------|---------------------------------------------------------------------------------------------------------------------------------------------------------------------------------------------------------------------------------------------------------------------------------------------------------------------------------------------------------------------------------------------------------------------------------------------------------------------------------------------------------------------------------------------------------------------------------------|
|                                 | VPIRERPAWKNYGGLIRGSSIIYALSGITATLPVENNMERPKLFFIVLQYG<br>MSVVLCLVTVTGFFGYWGFGENCQGPITVHMGVSEVFPILILQFKLILMLC<br>VTFGVKFWVPFRLVWYYLGKLNDRDKLWERIYMMFLIILITGITTLVPNL<br>TSVMVFMGSFLPPLTAIIFPALIDSFAFWNEYQKERFRWKLTLINIMSVMIAF<br>TIVGSAFCLMFIKV                                                                                                                                                                                                                                                                                                                                           |
| BmAAAP3<br>(XP_004924<br>926.1) | MFIYKFMGGIVETITGGDEEASYDPHLHRKIEKPTSYSSETMIHLLKGSIGA<br>GILAMPEAVRRVGIFASIAGLLLVGFASYCLQLLIVAQYELCKRWRRGYM<br>AYPKSMRLALQDGPCLRWSSGLLYYFVDVVLILWQLGICVIYPVFAENI<br>KQVCDSYNLELGLRTHLCCILGPLIIVSMVKDLKVMTPFSSVSNVITILGLI<br>LVFFYMIEEDLSFEKEKMEVKSADIPVFGVTLFALEAVGVVLALEYNM<br>ENPKHFCGIFGLFNIGMMIIIALYLMVGVFGYVKYGDEIKASITLNLQNE<br>KKAQAAKLIFALSIFLSPQLQNFVAYNIIWRRLLKKKITGKKKCPIDYALRILL<br>VLVPWALAIAVPQLGPFISLFGALCLSLAVVFPGLIDVCIWYPDRYGLCY<br>KLLRDVFIHAGLVCLVSGSYSSMIEIVNMK                                                                                                   |
| BmAAAP4<br>(XP_004924<br>927.1) | MDENKAETMYLRAVPDDVNGEAKDSAAEENYDPHEHRQLPKPTNNIETL<br>IHLKCSLGTGILAMPQAFARAGLVTGIVFTVLIGVLVTHCLHVLVRSQYA<br>ACKHLRVPLLSYPASMAAALEVGPAPFRRLARPASITVDIFLVVYQLGICC<br>VYIVFIADNIKKIVDPFYAMAVELHMLIILCPLIVFNLIPSLKLLAPFSAVAN<br>VLTFIGLGIVVYYLATGKKSHQPLDLWGSLETFFLFFGTVLEALTAVGVVIA<br>LENNMKTPKAFGSPCGVLNSGMALIVLLYVTVGAMGYIYCVSKCSDSITL<br>DLPSGPLATSVIVMFAVAIFISYGLHCFVPVDVWVRGYVEPRLRAAATPPA<br>RLVLAEYVLRVLLCLLTFVLAVSVPRLLGLFISLFGALCLSALGICFPAIMEA<br>CVKFPHDLKPIWLLKDVLLFLVGLVAGTYTALQAIKRSFQSTSPLHA                                                                              |
| BmAAAP5<br>(XP_004927<br>269.1) | MNGNCNPETPLEESQTKPLVSSHDRTYVGETTGGLSVLFTILCIVDLFGV<br>FPVIALPKSVISCGIYGIPLVLSVGLQLYTAALLGRCWLLAKEITPIISEKN<br>RSPYAAVAQLAFGDPARRLVIFLIDATVFGSGVPNFILAAQSLQIFWWKISG<br>GNVGVTYCIWMLVLALLCPIMWLGSPKDMKPLALTSVFIVTTVAVSTWT<br>CIIQDDVSPVSTGTILEYQPHAPDFLIAYGILAFQFDIHPMLLTIQVDMRDSK<br>KVNKAVLGGFAITGFMFTTTAFLVATRYGQDVTNNILQTIPPSIPLYLVALLV<br>TLQLCLSSAVSNSALFQHIEDLLQIPRNFCIQRCLIRSSVAVAVFLAETVPR<br>FDLVMGLVGSTLTGPLMFIFPPLFFLKLCYLKSKKDITESQNAYSNNATNG<br>SLDSQKSKLNKIETSGSSQQNGVVTVIQNGENVNPSLYTKYKTFSRDYAE<br>MGKEDEYTIKWDIVLALVMTLGIATVIATYCSWAHSIEYAEFSPCLL<br>NATIAARSFLESQMAL |
| BmAAAP6<br>(XP_004927<br>808.1) | MGDVKKQPHIDYDPFEHREVEKPNSDVRSTANLIKASLGTGILAGPLAFS<br>NAGWGVGLIGTLFIGFLCTHCHILVKTSRGCKIEKKPLLDYAETCRSVFA<br>NGPKSVRRFAGAASIFAEFALLSTYVGVCCIYTVLISDSIKQLVDHYVPSVT<br>IPVEYYCLILLPLCVLCQIRYLKFLAVFSMIANVLLVATYAICLYYIFGGGIS<br>FVDKKVAGDPARYPAFISTVIFAMEGIGVMPVENSMMKPKQNFLGFPSVLV<br>VAMSTIVFLYSTLGLFGYFRYGDVLRGTITLNLPTTEWPAIFAKIFIALSIFFT<br>YPLQFYVVIDIFTKYTKHHIKENYQKMAQVAVARTVGVTCVIGIALPPLLE<br>QIINIVGAIFYSILGLVIPAIVETVFRWNDLGKFKWILWKNVLILLFGLGSLV<br>SGCTVTIMDIIQVLKQKTE                                                                                                     |
| BmAAAP7                         | MYPKLEKMSGKTVKEDEYNPYEHRKIEKPNSDIRSLANLIKSSLGSGLLA                                                                                                                                                                                                                                                                                                                                                                                                                                                                                                                                    |

|                                  |                                                                                                                                                                                                                                                                                                                                                                                                                                                                                                              |
|----------------------------------|--------------------------------------------------------------------------------------------------------------------------------------------------------------------------------------------------------------------------------------------------------------------------------------------------------------------------------------------------------------------------------------------------------------------------------------------------------------------------------------------------------------|
| (XP_004927<br>809.1)             | MPLAFSNSGWAVGIIGTIVIAFVCGHCVHIFVKTSRGCCCKLVRRPLLSYSET<br>CKAAFEHGPKSLRPFADFAAQLFSEFALFFTYIGVCCIFTVLIADSLKQLFDE<br>YVTTTVLPVEYYCLILVPLCLMVQIRHLKWLAPFSFIANILLIATFVICMY<br>YIFGDEINFDTKRISGDL SRLPAFLSTVIFAMEGIGVMPVENTMKKPQHFL<br>GCPSVLVAMSTIMLMYSILGLFGYFRYGDVLRGSITLNLPIDDWPAVCAK<br>TFIALSIFFTYPLHFFVVDIFTRYAEPHIKKEYRNFAQILARTSCVWICGGI<br>GIALPMLEQIINIVGALFY SILGLIIPGVIE TVFRWEDLGRWNWIFWKNLLIV<br>LFGVCSLVSGCTVSVMDIISILNKKTI                                                                        |
| BmAAAP8<br>(XP_004927<br>982.1)  | MISENFSVSGSNEDMPSKTQSTITLDRKDAVVENDYNPF EHRTLEHKTSTI<br>GAFFHLLKSSLGSGILAMPMAFKNIGLIPGSIGTVVAVIATHCVHILVSTSR<br>DVCKATKTPSLSYTDT CETVFKIGPRKLRPYSLHVRYFVDAAMAGVCLGG<br>TSVYVIFIASLKDIFDHLTPQHILSVEVYCCILLPLIITQIRYLKFLVPFSLF<br>SNLCLIVTFGITCYTTFHDIPSEAKLVVDISRWPLFLSTAIFAMEGINVVM<br>PVENEMAKPEKFLGCPGVNFTMIFVAVLYGVVGIFGYLKYGNEVMGSV<br>TINLPQDEILALIAKFLVAIAVFFTYCLQMYAPMDIHWTRLKPHIGSGYHNS<br>AQILLRRLSVLTVVLAIAIPDLGLLIGLVGAIFFSTL GILIPVIVQTVHKWN<br>KTSLSYLLWKNGLLIIYFIVLISGCYSAVRDILIKYSSM          |
| BmAAAP9<br>(XP_004927<br>983.1)  | MLLSFALIFYVPVDIAWRRIQDRIPAKTHR WAMSGLRLFGTLFIVGLACAV<br>PKLELFMELVGAVCLSVLGLLLPSVIEIWRWGRDIGPTHWVWKNLVICL<br>FAIAMVSGVTFAIKSMLNENL                                                                                                                                                                                                                                                                                                                                                                           |
| BmAAAP10<br>(XP_004929<br>516.1) | MSDEKQPLLTGPNPENVIEIQSTEPVINDDGPST ETKKGDYCPASERCLEY<br>PTSNFDTMIHLLKGNIGTGILAMPDAFKNAGLIFGVFCTLIMGAMCTHCM<br>HILVQCSHEL CIRSEKPALESFSEVIEDSFLSGPIVFRPYAKKMRALVNIFLVIT<br>QLGFCCVYFLFVATNLQDTMHLFRINLSVHLYLTL LPLIVALAMVKNLKY<br>LTPVSLVASIMTAWGLAITFYIYLQDLPHSKEVNPIATWHQLPLYFGTAIYAF<br>EGIGVVLPLENNMKTPEDFGGWNGVLNTGMVIVAALYTAVGFFGYLKYG<br>DSVQGSITLNLNPTLLAQSVRFVMAAAIFLSYGLQFYVPMNIVWPYVKS<br>LSENALKHGEAMTRIALISITFLAAAMIPNLSGIISLVGAFSSSALALIFPPL<br>IEIMTFWPDQLGKNDWKFWKDIVIIVFGVTGFLFGTYTSIENILIKS |
| BmAAAP11<br>(XP_004929<br>913.1) | MVNEPNGAIPAPQELETISPDEKNKEKIVSKY NMTKDAESGDFDPFTERK<br>LDTPTSNDLTLHLLKASLGTGILAMPKAFKAAGLINGILFTVIVAVVCTH<br>CSYILVKCAHVLYKTKKTKQMSFAEVGEAALDNGPQPLRKWANAFRIFIV<br>ISLFITYFGTCSVYTVIARNILQIIQFYCGDIINERFLIILLVPLILMAWIRNL<br>KYLAPVSMIANL FMAVGLGITLYLVGTGQLQYDKIKDMLFKHPSEWPEF<br>FSLTIFAMEAIGVVMPLNSMKTPRAMLGICGVLNKGMSGVTLVYILLGF<br>LGYLRFGEVQDSITLSLGDIPAQIVKLSIAIAVYCTFGLQFFVCIDIMWN<br>GIKDKFTKRPELADYIMRTIMVTVCVSIAAAVPQISPLMGVIGAFCSILGLI<br>APAMIEVITYWEPGVGPGKYLIWKNILVIFGTFSLVFGTKDAILAILKDF     |
| BmAAAP12<br>(XP_012550<br>548.1) | MFNLGRFKIPPIKNALDVALQTVRQQMPDKPGPPRPQQNVRFANLDNM<br>GESCELSTMNETTSPSYQSTNPNPFLSGELQAEDSFTSYQNTYPQQDZIA<br>PRTQSMQSVDFYASSEEGGFECCGKPGAKINEFQAAWNVTNAIQGMFV<br>VSLPFAVLQGGYWAIAMIGIAHICCYTGRILVECLYEDDPVSGQRVRVRD<br>SYVGIAKECFGRKYGARIVNLAQIHELLMTCILYVVVCGDLMIGTFPDGSID<br>TRSWMMLTGIFLLPLGFLKSLKSVSMLSFWCTMSHLIINAVLGYCILYIGD                                                                                                                                                                              |

|                                  |                                                                                                                                                                                                                                                                                                                                                                                                                                                                                                                                                                         |
|----------------------------------|-------------------------------------------------------------------------------------------------------------------------------------------------------------------------------------------------------------------------------------------------------------------------------------------------------------------------------------------------------------------------------------------------------------------------------------------------------------------------------------------------------------------------------------------------------------------------|
|                                  | WGWSKVKWNLDNFENFPISLGVVFSYTSQIFLPTLEGNMEDRSRFEWMLK<br>WSHIAAAAFKSVFGYVCFLTFQNDTQQVITNNLRSSGFKGLVNFLLVIKAV<br>LSYPLPYAAACDLLERALFRGKPKTLFPVIYALDGELKVGWGLAWRLGVIM<br>FTILMAIFIPHFTILMGFIGSFTGTMLSFIWPAYFHLKLGKGNQLESKTIADY<br>FIIGLGFLFGIIGMYDAGSALVRAFKIGLPF                                                                                                                                                                                                                                                                                                            |
| BmAAAP13<br>(XP_004923<br>783.2) | MANTNAPSDSTSKYQLKATGEAAKNYDFTKARPPAKTTNVIESIGHLIKSC<br>LGGGIVAIHESYKQCGLWTAFLVNFLLGFCVAYCMYMLARSAQRIYGKIQ<br>VPALSYPDLAEASLAVGPWDNMRKYSKCFRYLVDLTITMDLFGACCVYQ<br>VVIARTIKQLVEGTDLTDSAVGSSPAIRIYIIALLLPCILLCMITSLKYLAPFS<br>IVADFFILIVTVATVYYGKTHATVSPLEMPVFKTVPGLEFIFIGVCVFSMEGV<br>GATMAIENTMTEPKKVAVLLGGMGVVMVLMVAVGFFGYWGYGELSKS<br>PVTLNFPWEPFPIALKVFMGLMIYVTFALNFWVPFDLVWYYLKKRHQPQ<br>KYWLWERYRIIFVTGITLIAVTFPNISKLTALIGSFCLSSMGFMYPAFIELTL<br>DWTDPGLGFLMWRMVKCIIVALFGAVICVVGTYTNARALVHEVFK                                                                     |
| BmAAAP14<br>(XP_004923<br>997.2) | MRFLKSSPRKSEDDLSTQSSLRSMDSCELFGSACSDYSDCEYCDERRRQIK<br>KKYSPSDSYCSAMSRLTPLLGLVLA TRPAYKSLGDSTDTLGPGEVSSDAV<br>LSTYKKNFEKTVKNENKKQSSLV TIFSIWNTIMGSSLLTMAWGVERAGLP<br>AALVLVAVMAALCLYTAYILISVNAYHGSDTCSVQALCRLLLGGWAEALA<br>HVFSVLVLLGANIVYWILITNFFYFTVNYFIDLSVSNATEYNTLLCPNQIV<br>NESLMIPSPAESRYWGLHTTAPLYTALIVFPLLNFNRVVSFFTGFNSLGTLS<br>VFYLLIFVTVKGYAWGINMGALWSETHAARNAAVLSGMLALSFYIHNIIIIE<br>IMSNNARQDKNGRDLTIAFVLVTITYTMVGAVFYVCFPLAKSCIEDVVTV<br>YPLVAYMLRTEAAILLSLRDTPALMLLVNVCIVVMYTGALSGLVHVFPALPA<br>ALHVRSLHLRGELAHWMTLLYCLLVLAGAANLLMQFFITE                |
| BmAAAP15<br>(XP_012544<br>828.1) | MTVKEKIAISHISGS AVSLSQNGSTVTEPYGMFQSREQILPHTKGQLDMES<br>GKTRDGHKVRHPTS YWD TLLHIFKGNISSGLLAMGDAFKNGGIVFAPIMT<br>AILGVICVHAQHLLLN GSEEMHRQTKQDRPPGFAETVYLAFKAGPLRLRP<br>LATTMKIVVNFFLCITQLGFCCVYIVFIANNIKLICDHYEVIDLSIHMIIVVI<br>PVLLACMVRNLKYLT PFTIANIMMAVGVS VVIYQATLDLPSVHTRNYIAS<br>WQQLPLYFGTAVYAFEGIGLVLP LKNEMKNPEEFQKPFGLVNLIGMIIVGSIF<br>ITVGFLGYLKWGEVAGSLTLNLEPGHVLSNVVQVLIGCAVLFTYPLQFY<br>VPVGITWPALKKRCGEKCLIAKELGYRALLVLLTFILAESIPELGLFISLVGA<br>VSSTALALVFPPLVELVVASQKKEGLSVFIIVKDTIILFGLFVFTGTFFQSA<br>SIVRAFRI                                        |
| BmAAAP16<br>(XP_012544<br>833.1) | MPKNILAEMGSQVWLTPARQNKKEAEEWVKRNQTGPMINPSFEPDDFVP<br>HSLSPVKDEKKKPGDKSIFLVNMKEKDLQEVEEYEPYDNRVVDHPTTNT<br>TLLHLLKGS LGT GILAMPRAF SHAGYVVGIGTVIIGVLCTYCIHILLDSCY<br>ALCKRRKVPSLTYTAAAEAALSEGPDWCKACAPYAALIVNVFLLIYQIGT<br>CCVYVVFVSENIHFVLVKRFNVEITVFQVMLCILLPLILINWVRDLKYLAP<br>FSAVANVTIVGFGHILYYIFRETPTLEGKEPVGRLADFPFFGTVLFALAI<br>GVILPLENEMKTPKSFVKGKFGVLN RAMISIIILYVGMGLFGYLRGEE SMG<br>SITLNL PSETETLASV VQCLLAFAIFITHGLACYVAIDILWNEYIGVRLLSK<br>FRVWWEYIVRTIIVLITFGLAAAVPELDFISLFGALCLSALGLAFPAFIQSCT<br>YWYYVSRSERIRMIKNIIVVLFGLVGLIVGTWTSLSQSIQKFSGPHNPIVNG |

|                                  |                                                                                                                                                                                                                                                                                                                                                                                                                                                                                                                                                                           |
|----------------------------------|---------------------------------------------------------------------------------------------------------------------------------------------------------------------------------------------------------------------------------------------------------------------------------------------------------------------------------------------------------------------------------------------------------------------------------------------------------------------------------------------------------------------------------------------------------------------------|
|                                  | THFTMLNETTLP                                                                                                                                                                                                                                                                                                                                                                                                                                                                                                                                                              |
| BmAAAP17<br>(XP_012547<br>368.1) | MIEKCGRGKHLRRRQDKAIMEKNKSQSVKVDNFSSTIGLAANPGFQSTLS<br>IASKGLPQDDKPYNPFHRNVQHPNTTGLSILHLLKSCLGSGILAMPAAFK<br>NSGLVAGVIGTILAGFVCTHTVHILVKTSQQICVEAKRPSLSFAETCGAAF<br>MYGPKRLRSWSGAIQKFVDYSLSVTYLSVLCVYVVFVIGSSLKEALDVYM<br>PGYQLSIQAYCALSLVPLVVVCQIRNLKYLPFSAIANALIFLVFAITLYYMF<br>FDLPPVSDRVMVANVSTWPLFLSTVIFAMEGIGVVMPIVENEMANPRRFLG<br>CPGVLNTSMFIVITLYGVFGFFGYVQFGDDVKGSVTLNLPQDEIIAQS AKLI<br>MAFVIYLYALQFYVPMEIITRMLATRKSNSYENLIQITIRTCLVTLTVAIGA<br>AFPNLELVIGLVGAIFFSTLGLFIPVAVQTIYLWEKDFGRFNYILWKNIIIAIA<br>IIALVSGAYVSDIGILEDGRHTVINIVDENSTVT                     |
| BmAAAP18<br>(XP_012547<br>428.1) | MFYAIFGGECTQHEIVKNHATNIKMGGVEKKDGIVLNNFNSTANLTSNSG<br>FQSTLTLSKEVINEKAYDPFEHRNVEHPTSTMGSLAHLKSSLGSGVLA<br>MPAAFKNAGLVMGVIGNIFIGFICTHCYVVLVKTSQEVCVEAKKPSMGFA<br>ETCGAAFEFGPKLRPWSNFVRIFVDYALTCTYLAALCVYVVFIAENFKQ<br>VLDVYAPNDNLSVQAYCALTLVPLVMSQIRNLKWLVPFSAIANVFLVICF<br>GITLYYIFKDLPVKSEATMVASVSKWPLFISTVVFAMEGIGVVMPIENEMA<br>KPQHFLGCPGVLNVAMTVVVTLYGLVGLFGYMTFGDTVHGSVTLNLPKD<br>DVLAQAAKILMALAILFTYSLQLYVPMEMIWRQLKDKITVRYHNITQIAIR<br>TAAVVGSVILAAAIPNLELVINLCGAIFLSTLGLLTPAIVDTVHNWDRGLGF<br>FYWKLFKNIFIAMISLLAFFAGTFIAIQDMVNKISADPVLEKHLNTRTS                   |
| BmAAAP19<br>(XP_012551<br>575.1) | MGVAGQSITLANSIIGVGILAMPYCFQQCGILLATLILLTMGLVSRLLCCYFL<br>LKSALLARRRNFEFLAFHVFGPAGKMAVEIGIIGFLMGTCIAYFVVVGD LG<br>PQIISKMLNVNQSDILRTSIMVVVSLVCVLPLGLLRNVDSLSNVSAATICFY<br>LCLVVKVITEATSQLFEEELQNRMELWKPSGVLQCVPIFSMALFCQTQLFE<br>IFESLPTLSLEKMNLVTKNAINICTGVYFTLGLFGYIAFCSQDISGNILMSLS<br>PTMASDVIKLGFVMSLAFSFLIIFPCRASLYSFLYKKGIIVLGLIIMVLGTY<br>ANLQAAEGKHERYDEKYITQEKIDKMVEDFFQKREKLEKIIPAAEGEILPD<br>DAQKIIESNIIRESEVQPPNPVPPDSSKEKIPDIALI                                                                                                                             |
| BmAAAP20<br>(XP_012551<br>796.1) | MSKKHLHNQAAIPLAPAVFKKQRLRPMIAEYDSKKKGVRNDLSDVVMIK<br>YNVDPSEIPVEQQAGSTLPLMEIPGKDVEADEDYNPFEHRKLAHPTSDMD<br>TLIHLLKGS LGSGILAMPIAFKNAGLFFGLFATFAIGAICTYCVHVLVKT AH<br>ELCRRMQKPSLGAETAEEAFLSGPPSMHKFSRLAKAMVNWFLVLDLLG<br>CCCYYIVFVSKNVSQVVDYEAEGTSFHNHIRVYMAALLPFLIMMNLIRN<br>LKY LAPFSMIANVLVGTGMGITFY YLFQDIPSVSERDSFAEISTLPIFFGT AI<br>FALEGIGVVMPL ENNMKTP THFIGCPGVLNTGMFFVVTLYAFTGFFGYLK<br>YGDETKGSITLNLPESEKLGQCVKLMIATAIFFTYSLQFYVPMEI IWN NV R<br>HWFGAKKNLAEYSIRIALIVMTVCIAIAIPDLGPFISLVGAVCLSFLGLIFPAI<br>METVTFWDRPNGLGRFNWVLWKNVFMISFGILGFLTGSYVSIVEIIEGSSN |
| BmAAAP21<br>(XP_004934<br>379.2) | MEKTKPSAPPIQLVMDDNYSSKIELAYNGSREDMGPYVPANHRPME SNTS<br>SFGALAHLLKASLGSGVLAMPLAFKNAGLLVGCIGTMLIGLICGHV IHILV<br>KTSQQLCVEVKPALGYADTCEIVFQNGPKPIRKFA SIARELVDW SLAVTH<br>MGACCVYVVVIAESFRQVSVEYGGPDWSVTAYCALTLIVLIPLTQINKLK<br>YLVPFSAVANFVWLVSICISIIYYCLRDPDISERNMATSIDGIPTFISTSLFAM                                                                                                                                                                                                                                                                                       |



|                              |                                                                                                                                                                                                                                                                                                                                                                                                                                                                                                                     |
|------------------------------|---------------------------------------------------------------------------------------------------------------------------------------------------------------------------------------------------------------------------------------------------------------------------------------------------------------------------------------------------------------------------------------------------------------------------------------------------------------------------------------------------------------------|
|                              | EGIGVVMPIENEMLKPPQQLGCPGVLNIAMSAVVVLYGFVGFYGLQFGE<br>NVRGSLTLNPLDEVLAQTAKLLVACVMLLSFALIFYVPVDIAWRRIQDRIP<br>AKTHRWAMSGRLRFGTLFIVGLACAVPKLELFMELVGAVCLSVLGLLLPS<br>VIEIWRWGRDIGPHTHWIVWKNLVICLFAIIMVSGVTFAIKSMLENL                                                                                                                                                                                                                                                                                                   |
| DmAAAP1<br>(FBPP00715<br>39) | MLAHSAHVMTLANSIIGVILAMPFCFQKCGILLSIVLLVLSNGITRVCCH<br>YLIKTSLLTRRRSFEMGLHAFGTSGKLLVELCIIGYLIGTCITYFVVVGD<br>GPQIIAKIFALDVADHLHLRSLVMVVTVVCIVPLGMLRNVDSLSAVCTAS<br>IGFYVCLILKIVLEAQPHITANDWTEKVLWYEPAGVLQCLPIFSMALSCQM<br>QLFEVFESINQSLDKLNGIVRNATWICTFVYISVGGFFGYVAFCTHTFSGNI<br>LVNLSTSGSDIIGKIGFVLSIAFSFPLVIFPCRASLYSLLYRKGHTESSSYIPEQ<br>RFRFITIFVVSFSLCVALVPSVELIIGLVGSTIGVAICIMFPASSFRKIIKESM<br>ERTLAQFVFSVSGFLLMILGTYANLSAIDEKSS                                                                             |
| DmAAAP2<br>(FBPP00727<br>24) | MNDDIKTVTVYPTTLELTPTKTSANGSNDDYDPHQHRELKNPTTNFQTF<br>HFLKASVGTGVLAMPFAFAHAGYVNGTLLTLIIGSLALYCLHILIKCMYIL<br>CKRQRVPYVSFSQAMNLGLKQGPWLRCLAPIAVPFVDGFLAFYHFGICC<br>VYVVFIAESIKQLVDEYLVVWDVRIHMCIIIVPLLLIYSIKNLKLLAPSSAA<br>NLLLLVGFHILYYIFEELPPLSERDPFVAAGKLPTFFGTVLFALAVGVILAI<br>EENMATPKSFVGPCGILNSGMSIVLGLYVLLGFFGYWKYGNESSEGSITLNI<br>PQSEIPAQVVKVFFAITTWISYALQGYVTAHILWDKYLAKRFKETRQTFYE<br>LIFRAIIVLLTFGCAVAIPDLSVFLSLVGSFCLSILGLIFVLLQICVQYTEGYG<br>PFRIKLIINLLLLCFGIFGGVVGTYVSILDIIAVYK                      |
| DmAAAP3<br>(FBPP00741<br>57) | MDAEAPNQLEKNQTATVPRQETAEGGSTGETAVGGAAAKVTKEQDHD<br>YHPPTSYLETIVHLFKGNIGPGLFAMGDAFKNGGLLVAPLLTVVIAVVS<br>QHVLVTCSSKMRDLKGDVSCADYAQTVEQCFENGPSKLRGWSRTMGR<br>VDIFICVTQLGFCCYFVFISTNLKQILQAYDIDMNVHLVMLLAFFVPVLLSS<br>LITNLKWLTPVSMFANVCMILGLAITLYALKDGLPEVEERALWTNGSQL<br>ALFFGTAFAFEGIALVMPLKNAMRKPQFERPLGVLNVGMFLVSVMFMF<br>AGSVGYMKWGEQVGGSLTLNLGDTILAQAVKLMVSAGVLLGYPLQFFV<br>AIQIMWPNAKQMCIEGRSLLGELGFRTFMVLVTLAIAEMVPALGLFISLI<br>GALCSTALALVFPPIELISRSELNKGPGIWCVKNLVILVALLGFFTGSYE<br>SLKQIVKHFGEVEEH         |
| DmAAAP4<br>(FBPP00759<br>28) | MGDKGGFDPYENRNVAHPISDIGAFFSLLKCVVGTGVMAPLSFNYAGIVT<br>GIILLVSVCFMLIHGMQMLIICMIECSRMMQIGYATYPVAMVYSFDQGRFF<br>KYISKAGRYIVDGVLAFSQFGVCVVYNVFAATLKQLVDFYVWVADLRIY<br>IAVIALCLIPPFQIRKLYLVPFNILASILIYTGFSLMMYYLFDLPPITERNIL<br>FGRIDKIPLFFGIALFSITSVGMMLAVEATMAKPRHYLWFGILDRAILLVII<br>SYVTFGLMGYWRYGDETAGSISLNPTDEVLSQVAKGFIAAAIFLTYPLAG<br>FVIIDIIIMNHFWNKNGDLPNAALKESILRACTVVLICITAIIPNLGPLLSLV<br>GALTISLLNLVFPALIEICLYPPEYNYGKLLKVVLVKDIFYVIVGILILVQGT<br>VFSIKDMISEWGGDTTTTGGPETTAEETTANMSATLTALTAAPPDALRFR<br>FL |
| DmAAAP5<br>(FBPP00759<br>31) | MPVMTKNGHSNSAYVADHPDKLELAEKQKKNKAVVAKDPDYNPYHHRD<br>VEHPTTNSSETLFHLLKGLGTGILAMPNAFRNSGYITGSIGTIVIGICTFCI<br>HQLVKAQYELCRRKKMPSPMNYPMVAETAMGEGPKCFRVFAPYIGTVVNT                                                                                                                                                                                                                                                                                                                                                      |

|                              |                                                                                                                                                                                                                                                                                                                                                                                                                                                                                                                                                                                    |
|------------------------------|------------------------------------------------------------------------------------------------------------------------------------------------------------------------------------------------------------------------------------------------------------------------------------------------------------------------------------------------------------------------------------------------------------------------------------------------------------------------------------------------------------------------------------------------------------------------------------|
|                              | FLLIYQLGTCCVYVVFVASNIKAIVDAVADTSIDVRLCMIILLPLILINWVR<br>NLKYLAPFSTLANAITMVSFGIICYIFREPVTTEGKDAFGKPSNFPLFFGT<br>VLEALEAIGVILPLENEMKTPQKFGGSCGVLNVSMVLIVFLYVGMGLFGY<br>LNYGSAVLGSITLNMPEHEVLSMCVKGMLAFIYITHGLACYVAIDITWN<br>DYVAKRLGAQRNALFWEYAVRTGLVLITFLLAVAIPNLELFISLFGALCLSA<br>LGLAFPALIQICTHWYNTKGFQKVLVLSNFVLIIVGILGLVIGTYTSLKEI<br>VLTSE                                                                                                                                                                                                                                     |
| DmAAAP6<br>(FBPP00761<br>56) | MVNIVDSGSKHAPQEMEQLPGEGKVMYKIQPRKSDTEQALAGNDFDPF<br>ALRDNPHPTTDNETLHLLKASLGTGILGMPFAFMCSGLIMGIFSTIFTAFIC<br>THCSYVLVKCGHKLYRTRRTKMTFAEIAEAAAFQKGPKWCRGFAPVAKFS<br>ILFGLFLTYFGTCSVYTVIVASNFEQLISYWTGTAVSLRMLICIMLVPLILIA<br>WVPLNKYLAPVSMVANVFMGLGLGITFYLVQDLPPVEERESVWSTLP<br>QFFSITIFAMEAIGVVMPLNNMKTPQSFLGICGVLVLSQGMMSGVTLIYMLLG<br>FLGYLRYGSATGESITLNLPIEWPAAQTVKVLISLAVYCTFGLQFFVCLEIHW<br>DGIKEKCKKRPTLVNYVLRVTVLTAAVVLAVAVPTIGPFMGLIGAFCSILG<br>LIFPVVIELIVHWESGFGKYNWILWKNAIITLCGIGALVFGTQAAIKDIVKA<br>YSNNENVGE                                                           |
| DmAAAP7<br>(FBPP00792<br>71) | MEDLTPLTNLQQIPEGAPRKKKMTERQPLLLQSDASDYEGSRGSAARPV<br>SSPPDNTLVNVHSEDSLAAASGSGDDEIGSTDKSYNPTHHRDLEHPTSNFDT<br>LVHLLKGNIGTGILAMPDAFKNAGLYVGLFGTMIMGAICTHCHMLVNC<br>SHELRRFQQPSLDFSEVAYCSFESGPLGLRRYSMLARRIVTFLFITQIGFC<br>CVYFLFVALNIKDVMDHYKMPVQIYLLIMLGMILLNLVRNLKYLTPVS<br>LVAALLTVAGLAITFSYMLVDLPDVHTVKPVATWATLPLYFGTAIYAFEGIG<br>VVLPLENNMRTPEDFGGTTGVLNTGMVIVACLYTAVGFFGYLKYGEHVE<br>GSITLNLPGDLSQLVRISMAVAIFLSYTLQFYVPVNIVEPFVRSDFDTR<br>AKDLSATVLRVVLVTFLLATCIPNLGSIISLVGAVSSSALALIAPPIEVITF<br>YNVGYGRFNWMLWKDVLILIFGLCGFVFGTWASLAQILNDRTH                                  |
| DmAAAP8<br>(FBPP00841<br>26) | MFFFRRQNAKPAPRPSRAPSFALPKRRPPVQLTPSHQHDQLPFLRRSRFSA<br>LPHFRAYEDEPENLSLFIAILYVVDLFGIFPFVTLPALLVKLG YFGILLVLSIII<br>LQIYTSFLLSQCWTMAELLDPSIQQKRNYPYAALAEAYGPYMSLLVSVL<br>LDLSIFAMAVPSVVMMAQNLEGVVL RMSAGQYNFSYCYWAIIVGLVICPL<br>MWLGSPKHMRLAIIAVCMIVIVALWFLFAAPAIGTPFEGISLELPGFL<br>TVLNSYSILAFQFDIHPVLLTLQIDMKQKSQVSWAALIGIAITCSVAIFGSIIA<br>AYKFGSMIADNLLQSLPTSVPFYVMLILMALQLCFSVTVASSAMFMQIEN<br>YFKLPESLSFKRMLIRSSVLALEVLVAEFVPSFDALMDVVGTTITGPLVFIL<br>PPLLYRRIRRMERVHQRIAAEASYGSLPLDLNYDPVDLEMEPLLVISPPTP<br>RGCWLRVRLHRLECDV SCTMAVLIFGLLATFLSTYLNIFSLASLFTNNSP<br>CLSNLTKHF |
| DmAAAP9<br>(FBPP00867<br>03) | MSFIAKLLKATPLPLRNILNVAVQTARQQIPERKDYEQPPGSTAQQHHHSQ<br>QAQHKAMEAGMDGGDTTESSNPFNAGSWTNDGEGGGDGDGEYRNE<br>YQSTSFNEYDGRYQQTDGFRQGSIASEGSSFVCEGEGGGGCKIDEFQAAW<br>NVTNAIQGMFIVSLPFAVLHGGYWAIVAMVGIAHICCYTGKVLVQCLYEP<br>DPATGQMVRVRDSYVAIAKVCFGPKL GARAVSIAQLIELLMTCILYVVVCG<br>DLLAGTYPQGSFDSRSWMLFVGIFLLPMGFLKSLK MVSTLSFWCTMSHIV                                                                                                                                                                                                                                                    |

|                               |                                                                                                                                                                                                                                                                                                                                                                                                                                                                                                                                                                                                            |
|-------------------------------|------------------------------------------------------------------------------------------------------------------------------------------------------------------------------------------------------------------------------------------------------------------------------------------------------------------------------------------------------------------------------------------------------------------------------------------------------------------------------------------------------------------------------------------------------------------------------------------------------------|
|                               | <p>INAVILGYCLLQIGDWGWSKVRFSIDMENFPISLGVIVFSYTSQIFLPTLEG<br/> NMIDRSKFNWMLDWSHIAAAVFKAGFGYICFLTQNDTQQVITNNLHSQ<br/> GFKGMVNFLLVIKALLSYPLPYAAACELLERNFFRGPPTKFKPTIWNLDGE<br/> LKVWGLGFRVGVIVSTILMAIFIPHSILMGFIGSFTGTMLSFIWPCYFHIKI<br/> KGHLLDQKEIAKDYLIIIGLVLFVIGIYDSGNALINAFEIGLPIF</p>                                                                                                                                                                                                                                                                                                                    |
| DmAAAP10<br>(FBPP00869<br>94) | <p>MADNKGFTPDGQESLPSAPTVENPPPYTNAINDFNKANKLTKELSLTDDP<br/> YHPFEHRDPNGASAGGALAHLLKSSLGTGILAMPMAFHNAFLAFGMAM<br/> TLIVGFLCTHCVHILVKTSHDICRDAKVSALGFAETAEKVFEYGPKGMRPY<br/> SNFAKQFVDIGLMATYAAACVYIVFIATSFHDVINYDLKINWDVRIYIALT<br/> VIPCLLIGQIRDLKWLVPFSMMANIFIVVTFAITLYYMFDEPLVYSDKPLIA<br/> KAAHIPLFFATVIFAMEGIGVMPVENS MRKPQHFLGCPGVLNIAMVTVV<br/> SLYAIIGFFGYVRFQDQVRGSITLNLPEGAWLGDTAKLLMAVAILFTFGLQF<br/> YVPNEILWRKISHKFSPEKHNTQILLRSGIILLSSGGVAAAIPNLEPFISLVGA<br/> VFFSLLGIFVPSFVETVYLWPDRLGVCKWKLKLVKNIFLGVFSILALVAGAVA<br/> SINEIEMYSDDD</p>                                                     |
| DmAAAP11<br>(FBPP00872<br>94) | <p>MEPKSQDQAPNRDDPDLQTEPLTIAQSITSFYMYNPNYEKRSVEVPLTNC<br/> AFISLLKCVIGTGILAMPLAFRCSGFVMGTVMMSILLMILLTYSIHLLIADMT<br/> ECCRRRRVPQVSMPEAVRIAYEEGPKWINCFGRAAGFMTTCVLFVFGQFL<br/> CTVYLVFVSKNFKEIGDHYIERYNERYYVLVACLILLPLFMIRRLKYLPL<br/> NLISNFLLYAGFALIMYYLNFGLPNINDREMTTPVVEWIEFIAIAAFSLTAVG<br/> SMLVVEAHMAHPQSYLGLFVNLAVL FILLSNMFFGIIGYWRFGDNVHA<br/> SITLNIQDEILSQFIKVFIA SGIFLSYPLNGFVVITVMFSDYENSEPRGRYRT<br/> LIEYVVRLLFLFTGAVAIGVNLAAALTELEGAFSLSNLNLLCPALIDVFLN<br/> YNVGYGRLMWKLRDILLILIGLIFGIVGCTVALMQLIRDFQLTLNSM</p>                                                                           |
| DmAAAP12<br>(FBPP00877<br>43) | <p>MNMNMNDSRRNTATEFSYILQRQGSVSVAEAYAFDDFNIMKNNHQTH<br/> QQQGQPQQPHQQQQPPQQQQQQHRQHSQQQQQAQQDAGLGDTLSS<br/> LPQASFNYSIVGSGVIGIPYALHRAGFGLGLALLILVAYITDYSILMVR<br/> GHICGRFSYPGIMEAAYGKYGYLLSLLQFMYPFLAMISYNVVVGDTL<br/> VLRFFPSWGGSMGAVRLGVVFFVNVGVVMPCLCYKNVSRLLARAFSISL<br/> ACVVFILFAV IIKLMSGDYKVTDAESWRFANS DLIPATGIMVFAFMCHHN<br/> TFLVYQSMRDATMERWEKVTHISIGFAWTVAALFGIAGYSTFRALSQGD<br/> LENYCWDDDLMNFSRVLFSISILLTFPIECFVSREIVRALVHRFVLKEPISE<br/> TQDKDPSLEKGAIDEYSKAITMAIVFSAFVISPMTDCLGSLVLELNGLLAAI<br/> PLAYILPGLAYIQMEPHALLSREKLPALGLVVFVFGALVTILGA AVLLPGLMG<br/> GDCRSDIVMGYCRQEFQNTTSSN</p> |
| DmAAAP13<br>(FBPP02894<br>25) | <p>MRNTRRRRLDQKLPFHQRLLGGVQNSFGSPLANEARLSSKKDNGMSDLE<br/> AFINVLKCGFGTGCLAMPYAFLNSGWLVLGLICTFALGFFVLYAMHILLHHI<br/> NNLGVQHNMPMISYRKAVEL SIRKGPSIFHFLSKPFGYLV DILLCAYHFGV<br/> DCVYVVFIAKSLKHLGDMYLWVWDERLYMALIASPLILTLIRNLKSLVPF<br/> SIISNILLTGYCVILNYLFRDLPEFEHLHAIQPLRNFPPIFGTVLFSIESVGI<br/> LSLGRSMRKPESLMGTCGVLNQGMIVVISFYAVFGFFGYWRYGENTSNSI<br/> LQNMPQNDILPKLATGIFALAIFFSYALQGYVTVDIWRNYLEPELEDRYLR<br/> TVECLLRIALVIASVLVAIQYPDFGLLSLVGSFCLAQLGLILPGIVDICLRY<br/> EEDYGP GKIFLIRSM LFICMGLAGGVAGTVVTLQTLYARYPVVVRG</p>                                                                          |

|                                 |                                                                                                                                                                                                                                                                                                                                                                                                                                                                                                                                                        |
|---------------------------------|--------------------------------------------------------------------------------------------------------------------------------------------------------------------------------------------------------------------------------------------------------------------------------------------------------------------------------------------------------------------------------------------------------------------------------------------------------------------------------------------------------------------------------------------------------|
| DmAAAP14<br>(FBPP03027<br>03)   | MSFHKSDSRTPLAPTEYTKIPTVTAGYGENEKPKGGKGGQSKFIRSDMAD<br>VPVQQAAGSTLPLVISRKKGDDSEDGNYNPFHRKVEHPTSLETFFVHLL<br>KGSLSGILAMPMAFASHAGLWFLVATFAVGTLCYCVHILVKCAHILCRR<br>RKIPMMGFADVAEQAFLDGPPALNRWSRFIRFMVNTFLVIDLLGCCCIYLV<br>FVATNVEQVVRVYMETELSIRVWIMIVTAPLIFMCLVRNLKFLTPFSMIANI<br>LMFVGVITFIYMFSDIPAPVERPGIVSVTEWPLFFGTVIFALEGIGVVMSSLE<br>NDMKNPSHFIGCPSVLNFGMGLVIALYTLVGFFGFLKYGPETQASITLNLPL<br>LEDKLAQSVKLMIAIAIFFTTLQFYVPVTILWKGLEHKIRPEKQNISEYGL<br>RVFLVLLCGGIAVALPNLPGFISLIGAVCLSTLGMIVPATIELAVYHEDPGYG<br>RFNWRLWKNSGLILFGVVGFAVGTYSIIHFHAEFSSGH |
| DmAAAP15<br>(FBPP03065<br>36)   | MPKRDLTVLHRYFSGRLFPARTQQQSDQKAIEAAGEMGRTEITGRQND<br>KSLEKNPERFTKNVTEKGADPENGDPVRRRGHETSELEAATHLFKGSVGA<br>GLFAMGDCFKNGGLAGATILLPIIAVMCVHCERMLIRGSVLAVERTPGVDF<br>LDYPETVEKCFEHGPRPLRKMSRVMKLVEMFLCVTQFGFCAIYFVFITEN<br>LHQVLQONGIVISMSMVMLITLLPAMIPSLMTNLKYISPVSLFANVALLFG<br>LIATLTIASFSDGPMPSVGDRHLFTGGAQLALFFGTALFSYEGIALILPLRNS<br>MRRPEKFSTRFGVLNSTMFFTTALFIFTGFVSYVRWGEEVAGSITLNLVVE<br>EVFSQVVKVIAALGVFLGYPIQFFVMIKILWPPLKRSNNCTQKYPITSQVC<br>LRFFMVMMTFGVALVVPKLNLFISLIGALCSTCLAFVIPVLIDFVTRAQVP<br>KALGVWSYIKNILITVAVLGIVTGTYSIVEIVKEFK       |
| MsAAAP1<br>(MSEX2.013<br>32-RA) | MSKSGLETRAAGSKATETPLVAKTELEGGDGNKGGGLSTTQTAFLIAG<br>EMAGSGVLALPRALVKTGWVGVPIIIVMCMVAAFSGKRLGDCWTHIEDRD<br>PNMRSRKRNPYAIIEAETLGKTWSVIVSMAIIVTLFGASVVYLLAAQIIEQ<br>VFLAIVPSLTICTWYLIVVGAMTPLMFFGTTPRDMTFTGIIAFGSTVIACVLY<br>FIEMMNEIHPFVFRWGIHGFQDFFLAFGTIMFAFGGASTFPTIQNDMTDKT<br>KFSKSLHYSFIEIWDMIVEENAAILLYLPIAIGGYAVYGESVASNVAASLM<br>ATPLTLVANVLMAIHLVFAFIILINPVCQEMEELYSVPQDSIGWRMAVRLSI<br>MAGILFIGESVPRFYTILALVGGSSVALLTYILPSYCYLSLISQAPRPGQAAV<br>ETPGWMKMVCYEVIALGVLGGIASSTYSAISAFSTAQATPCYL                                                   |
| MsAAAP2<br>(MSEX2.013<br>41-RA) | MKDKEPKVEVSHITGSTVTISHDGSNGTDGFGMFQSREQIIRPDSKSQLEL<br>ESGKTTGTQVTHPTSYLDTMLHIFRGNIGSGLLAMGDAFKNGGIVFAPIM<br>TAILGVMCVHAQHLLLNCSEDMHRQTKRDKPPGFAETVHLAFQNGPVRM<br>RPLANTMKILVNTFLCITQLGFCCVYIVFIANNLKMICDQYNINIDLSIHMII<br>VVIPVLLSCMVRNLKYLTPFSTIANIMMAVGAVVVIYKATLDLPPVNTRTY<br>LASWQQPLYPFGTAVYAFEGIGLVPLKNEMKNPEEFQKPFGLNVGMVV<br>VGCIFITVGLFLYKLGEEVAGSLTLNLQPGEVMSNVVQALIALAILFTYP<br>LQFYVPVDITWPPLRKRFRASPVAKELGYRALLVLLTFILAESIPQLGLFIS<br>LVGAVSSTALALIFPPLIELVASSQKPTGITTFMAIKDIVIILLGLFVFTGTYS<br>ESIASIVRAFQK                             |
| MsAAAP3<br>(MSEX2.017<br>60-RB) | MSSTERDERREQQAHEEPQENQEIQEQQNVSQEQREEEGTSSKRERTLE<br>RKTSAYSLSLSQYMECMEMRESTGYQVYPGTEREDYDFNAERFGVYSTN<br>LIESTAHLVKGCLGAGILSMHEAYMFAGLWTSVIVTIILATIMSHTMMMLV<br>KSAQKMYPLLRLPRLTYPDLLEAVATGPWKGLRCFSKCFRYAADFFLFFQ<br>MCGTCCIYEIMIANITLKGVLEAVSDSLQESNYDVRIYILIITVPLLAICLIRS                                                                                                                                                                                                                                                                          |

|                                 |                                                                                                                                                                                                                                                                                                                                                                                                                                                                                                                        |
|---------------------------------|------------------------------------------------------------------------------------------------------------------------------------------------------------------------------------------------------------------------------------------------------------------------------------------------------------------------------------------------------------------------------------------------------------------------------------------------------------------------------------------------------------------------|
|                                 | LKYLAPFAMVADTFVAICVLTIIYYSLKQAQNISDRPAWKSFSGVIRFCGIC<br>LYSMDGIGVTLPVENNMERPRYFYVVVAYGMTIVITSITITGFFGYWGWG<br>EECTSPVTIHMPMTDTLPILQLMAAMLSITFAVNFVWPFRVWVWHYIGRK<br>YKRNRCFWERIFRATHVILITAIITFPHLIQLMIFIGNFPLVFIASFVPLIES<br>LVTWKDDTLFKGVVRWRIVKNCIILFGFTISTSNLVAYGEGE                                                                                                                                                                                                                                                |
| MsAAAP4<br>(MSEX2.017<br>61-RA) | MELNSNCISHTQTLEFKDLSTKPPPQPPPEIEKKKYVLHSEKENYDFVAYR<br>STRKPTNVLESTGHLIKGCLGGGILGIHEAYMKCGLWTSLIVTIVFGFYITY<br>CVHILVKSQAQMLYKRLHIPEMSYPDVAEASLEVGPFPKLRKYSKWFRYAV<br>DITICIDLFGACCVYQIIIAKTIKQLAMNSTEVPAEDLNLRLYIFALLVPILL<br>LCMITTLKYLAPFTLIADVIVACVIATVYYSLREAPNISEVPSWKGVIGFFE<br>FCGIVVFSMEGIGVSLPIENNMKDPKKFPLVLCGGMSVVVSLILVGGFFGY<br>WGFGENSRSPVTLNFPPDVFPITLKCLMAVMIFVTFALNFWAPFNLVWHY<br>VSRKHDPKRYWLWERVYRAIFIVVITAIATAIAFPNIGNLMGLLGAFCLSNMG<br>FIFPAIIELLVWENPGLGRYKRWLWKNVFLVIVGVLLFVAGTYSNAKGLI<br>ANL |
| MsAAAP5<br>(MSEX2.017<br>62-RA) | MATPKPSTGGPGNFTVIAQSEEEEEAFNYVQFRHGVKFTSVTGSVAHIVK<br>GALGGGILSGHVAYMKAGVKVAVPLNVLFGFYMGYCLHLLVQSAQTLYK<br>RTRIPMSYADVGEAALACCPNRRLARFAKVFRHMIDVIICIDLFGACACY<br>HLIIGKSLKQLVENTIETSMEPLHPGYPSLRVYMACMIVPIICILHLKWL<br>APFSLAANMTIVFCIIMAIYYAFEYNPNFENLVGHTSLSLYHYLEFVGMTVFS<br>MSCAGVVIPIENNMREPKKFPLALTIGMSLIVICTFLVSFFGYAGFLEKSEA<br>PITVNFPMTVVALIFKYAVIIMYITHALNFWPPFNLVFHYLKKRHSRPERIVL<br>WELLYRAIFVIIIIVAIIFPNINALMGFLGTFCLSNMAFIWPNVINLLVIWER<br>PGFGQYYWKLWRSIVFILVGIFILFCGSLVNIMELLTVFY                     |
| MsAAAP6<br>(MSEX2.047<br>86-RA) | MVNDNNGTVPAPELETFLSPEEKNKEKIVSKYNMTKDEELGEYDPFADR<br>KLENPTSNMDTLTHLLKASLGTGILAMPYAFKCAGLVLGILFTVLVAVVCT<br>HCSYILVKCAHVLYKKTRRNNMTFAEVGEASLKNQPALRKWAKSFRIFI<br>LVSLFMTYFGTCSVYTVIIAKNILQVVAHYMGVKPEDVEIRIFIIALLPLIL<br>MSWIRNLKYLAPVSMIANLFMALGLGITFYLVGTGKMETENISGMLFKS<br>YHTWPEFFSLTIFAMEAIGVVMPLNSMKTPRSMLGFCGVNLKGMMSGVTL<br>VYILLGLLGYLRFELVADSITLSLDNTQKLAQTVKISIAIAVFCYGLQFY<br>VCVEIMWNGIKDKFTKRPDLADYITRILVTACVLLAVAVPTIGPFMGVIG<br>AFCFSILGLIAPAIIEIVTYWDIGFGTGNYLWKNILVMIFGMFSLVFGTKDA<br>VTSIIMELYKK    |
| MsAAAP7<br>(MSEX2.049<br>28-RA) | MLKSNLFRSPYAAIAELAFGPPARRLVTFLLIDATVFGSGVPNIILAAQSMQ<br>LFWWKITGGNVGITYCVWMLLLGVILCPVMWLGSPKDMKPLALTSVFIV<br>STIAICTWTCIIMDNVTPLSVTNLMNYRPQSGDFLMAYGILAFQFDIHPML<br>LTIQVDMRDSRKINTAVLGGFAVTGFMFTVTLLMATRYGINIDNNILQTIP<br>PSIPLYVIALLVTLQSLSSAVGNSALFQHIEDLLKIPRNFICQRCLIRSSIAL<br>AVFLGESVPRFDLVMGLVGSTLTGPLMFIFPPLIFLRLCYIKSVKDANVDLS<br>NRLKNGVKPNGIANGVQNGRQRWPLIKESLETKYNTFTSTYVEIHPKRYD<br>GYSIKWYDVLLALIVMSMGIGATIVATYSSWSDTIAYAEFSPPCLINATIAA<br>RSFLRISSSVL                                                  |
| MsAAAP8                         | MTNVEKTAPEKADYNPFHRKVEKPNSDLRSTANLIKASLGSGLAGPLA                                                                                                                                                                                                                                                                                                                                                                                                                                                                       |

|                                  |                                                                                                                                                                                                                                                                                                                                                                                                                                                                                                                                      |
|----------------------------------|--------------------------------------------------------------------------------------------------------------------------------------------------------------------------------------------------------------------------------------------------------------------------------------------------------------------------------------------------------------------------------------------------------------------------------------------------------------------------------------------------------------------------------------|
| (MSEX2.056<br>49-RB)             | FANAGWGVGLVGTIFVGVICGHCVQILVETSRGCCKIEKKPMLGYAETCK<br>TAFKNGPKCVRSYADVASFVAEFALLSTYVGVCCIIYILISDSVKQLVDRY<br>VPSVILPVEYYCLILLVPLILLCQIRYLKFLAIFSLVANVLLVATYVICLYYIF<br>GDGFSISDKKIAGDPARYPAFISTVIFAMEGIGMVMMPVENAMKKPQNFLGC<br>PSVLMVAMTAIVFLYSTLGLFGYLQYGDVLRGSITLNLPTDEWPAVCAKIF<br>IALSIFFTFPLQFYVVIDIFTKYTLPRISGKHQNIVQVAARTIGVCCCVGIGM<br>ALPLLEQIINLVGAIFYLGLVIGVETVFKWENLGRYNWIFWKNLLIVVF<br>GLGSLISGCTVTIMDIKILSQKTE                                                                                                         |
| MsAAAP9<br>(MSEX2.056<br>50-RC)  | MIESKDKSDGEYNPFEHRNIKNPNTDIRSLANLLKSSLGTGILAIPLAFASS<br>GWALGIVGTITAFVCGHCVHIFVMTSRGCCKVERKPLLSYSATCKAAFAN<br>GPKATRPLATTAFLFAEFSLFFTYIGVCCIFTVLIADSIKQLFDRYVTTNISV<br>EYYCLFILVPLSLMVQIRHLKWLAPFSLLANILLIATFAICLYYIFRDELNFS<br>DKKPVGDPARFPAYLSTVIFAMEGIGVVMMPVENMMKNPKNFTKILTIAAMA<br>TILILYSALGLFGYFRYGDVLRGSITLNLPIDDWPAICAKSFIALSIFLTYPLH<br>FFVVDIFTRHVEPQIQKKYRSISQVVVRIACVWVCGGIGIALPMLEQIINF<br>VGALFYSILGLIIPGVVETVFRWDNLGKYNWILWKNLIVLFGMCCLLSGC<br>AVTIMDIIDKLHNKTE                                                      |
| MsAAAP10<br>(MSEX2.056<br>51-RA) | MANSYNMKEFSSTAIITENSIYPSTISISTINTKCKEDDLEMTAYDPFQNRKL<br>EHPNSDIRSFANLLKSSLGSGILAMPAAFKNAGTIVGVFGTIIILGYICTHCV<br>YLLVKTSEQEVSKVAKAPSLGYAETIEAVFAHGPQPLRKLRSRIFIDWTM<br>AFTILGACAVYVILLVDSVKQIVDHFYGPDVINKTMYFLMFLVPILLFTQIK<br>NLKYLAPFSGFANVLLILTLICLYYICSEFPDLDSRPMSANIGDLPLFIGTVI<br>FAMEGIGVVLVENTMAKPQHFLGCPGVLNITMTVVLLYVMVMGFLGY<br>VRYGDEAKGSITLNLDTGEIPALMAKIFILAIFFTYTLQFYVPMIEVWRNT<br>KEHIAQKYHNTAQCIMRAIFATLTVA AAAATLPQLEQVIGLEGAFFYSFLGLI<br>APSMMDLIFNWERGFGKYNWILIKDLLLLVFFGTFLIAGVTQSLREIIRTNS                    |
| MsAAAP11<br>(MSEX2.065<br>88-RA) | MRPMIAEYDPKKKGKNDLSDVVMVVKYKVPNEIPVEQQAGSTLPLMEI<br>PGRDIEADEDYNPFEHRKLAHPTSDMDTLIHLLKGSLSGILAMPMAFRN<br>AGLYFGLIATFAIGGICTYCVHVLVKTAEHEL CRRMQKPSLGAETAEEAFL<br>SGPPSMHKFSRLAKAMVNWFLVVDLLGCCCVYIVFIAKNVSQVINHLQ<br>GTVWYDMDIRVYMAMLYPFLIMMNLIRNLKYLAPFSLANVLVGVGMG<br>ITFYYLQDIPSPSDRDAMADFYRLPTFFGTAFALLEGIGVVMPLNNMKTP<br>THFIGCPGVLNTGMFFVVSLYAFVGGFYLYKFGDNTASSITLNPNEILLGE<br>SVKLMIAVAIAFFTYSLQFYVPMIEVIWKNVRHLFGAKKNLAEYSIRIAVITM<br>TVCIAIAIPDLGPFISLVGAVCLSFLGLIFPAVETVTFWDRPNGLGRFNWVL<br>WKNIFMISFGIVGFLTGSYVSILGIIHGEE |
| MsAAAP12<br>(MSEX2.079<br>96-RA) | MGTAGQSITLANSIIGVILAMPFCFQKCGVVLATLILLSMGLVSRLLCCYFL<br>LKSALLARRRNFEFLAFHVFGPAGKMAVEVGIIGFLMGTCIAYFVVVGD<br>GPQIIAKMLNINQSDILRTSIMVIVSLVCVLPGLLRNVDSLSNVSAATIGFY<br>FCLVMKVIAEAASQLLTGEWHTRMEMWKPSGFLQCVPIFSMALFCQTQL<br>FEIFESLPSLSLEKMNLVTKNAINICTGVYFTLGLFGYIAFCSQEISGNILMS<br>LSPTMTSDVIKLGFMVSLAFSPLIIFPCRASLYSFLYKKVHSSHHDHVMN<br>HSIPERSFRCTVAIIAVALFISLLIPNIELVLGLVGSTIGVLICVVFPAACFVNV<br>TFKNTNERVLAKAILLLGLIIMVLGTYANLQAAETQLDRYDDKYITQERID                                                                              |

|                                  |                                                                                                                                                                                                                                                                                                                                                                                                                                                                                                           |
|----------------------------------|-----------------------------------------------------------------------------------------------------------------------------------------------------------------------------------------------------------------------------------------------------------------------------------------------------------------------------------------------------------------------------------------------------------------------------------------------------------------------------------------------------------|
|                                  | KIVEDFFEKRGKLEEIKVKPLPESVNPDPPIIIDNIIKDSEVQPPNPVPPD<br>MSNEKVPNNPIKELKEKHEVIKTSAEKLSLH                                                                                                                                                                                                                                                                                                                                                                                                                    |
| MsAAAP13<br>(MSEX2.095<br>82-RA) | MYFNKSKVVFTKPAEIKCRILLCFSVQVKTSQEVCEAKKPSMGFAETC<br>GAALQFGPKLRPWANFAKTFVDYAMTATYLAALCVYIVFIAENFKEVLD<br>VYMPEYQLPVEAYCALTLVPLVLICQIRNLKYLVPFSAIANVFLVICFGITM<br>YYIFNDLPNPKEREMVASVTQWPLFISTVIFAMEGIGVVMVENEMAKPQ<br>QFLGCPGVLNIAMTIVISLYGIVGFFGYIKYGDDVRGSVTLNLPADDFLSQS<br>AKILMALAILFTYSLQFYVPMEMIWRQLHNKISVRYHNISQISIRTAAVVGS<br>VAIAAFPDELEFINLSGAIFLSSLGLLTPAVIDTIHKWDRGLGRFNWILWK<br>NIFIALISLTALFSGSFTSIKSMHLKFGNTHLEAALNRTSMFNETMAV                                                             |
| MsAAAP14<br>(MSEX2.095<br>83-RA) | MEKERPSAPEIRTVMDNYSSKIELAYNGSREDLDPYVPAEHRPSESNTSSF<br>GALAHLLKASLGSGVLAMPLAFKNAGLLVGCIGTVLIGFICGHVIHVLVRT<br>SQQLCVEVKKPALGYAETCDLVFQNGPKPVRKYATFARELVDWALAVTHI<br>GACCVYVVVIAESFRQVSIFYGGPNWSVTAYCALTLIVLVLPLTQITKLKYL<br>VPFSALANFVWLASICISIIYCLRGTPKISERNMATSISGIPTFISTSLFAMEG<br>IGVVMPIENEMVKPQQFLGCPGVLNIAMTAVVMYAFVGFYGLQFGEEV<br>RGSRTLNLQDEILAQTAKLLVACVMLLSFALIFYVPVDIVWKRVEKIPAR<br>GQRWGLAGIRLVGTLFTVGLACAIPKLELFMELVGAVCLSVLGLLLPSLTE<br>TVWRWGRDIGPCHVWVWKNAILGVFSIVAMISGVAYAIAMIEKL       |
| MsAAAP15<br>(MSEX2.095<br>84-RA) | MEIVKVTDNLRVADSRNMMNSTHSTVTLDRKGVEEPEEYDPFEHRNITH<br>PTSTLGAFHLLKSSLGSGFLAMPAAFRNTGLIPGCIGTALVAVIATHCVHIL<br>VSTSREVCKEARTAAMSYPDTCWVFKLGPKLRKYSTHVRHFVDSAM<br>AGVCLGGTSVYVIFIASSLKDIFDHFPEHKLSVEAYCGILLVPLILITQIRYL<br>KFLVPFSIFANVCLVLTFGITCYTFQDIPWPNEAELVTGVTRWPLFLSTAIF<br>AMEGINVVMPIENEMAKPKHFLGCPGVLNSTMIFVAVVYGIVGIFGYLKY<br>GNTVQGSVTLNLPQGEILALVAKVLVATAVFFTYCLQMYAPMDIHWTRLRG<br>NFSKRYHNVSQIGMRTISVILTVLAAAVPDLELLIGLVGAIFFSTLGLLIPV<br>VVETVHKWHRGLGPGIILWKNFLLLFYFVLLSGCYSASEIVAKYTR       |
| MsAAAP16<br>(MSEX2.095<br>30-RA) | MSDEKQPLLTGPNIPDYIEVQPVELTAGSLATPDEKPKPDYHPASERCLEYP<br>TSNFDTLIHLLKGNIGTGILAMPDAFKNAGLIFGVFCTMVMGAICTHMH<br>VLVQCSHELRCIRSQRPALSFSEVEDSFASGPISFRPYAKKMKKTIVNVFLVT<br>TQLGFCCVYFLFVATNLQDSLRLFHINLPVHVYLVLLFPILALSMVKNLK<br>YLTPVSLIASIMTAWGLVITFYIYLQDLPHTDTVKAIATWHQLPLYFGTAIY<br>AFEGIGVVLPLENNMKTPEDFGGWTGVLNTGMVIVGALYTAGVFFGYLK<br>YGNHVQGSITLNLNPTLLAQSVRSVMAAAIFLSYGLQFYVPMNIVWPYV<br>KSKLTSEQALKYGETVTRFVLISTTFLAAALIPNLSGIISLVGAFSSSALALIF<br>PPIIEIMTFWPDQLGKYDWKLWKDVVHIFGITGFVFGTYTSIENIIIHT |
| MsAAAP17<br>(MSEX2.099<br>62-RB) | MAAFEAVSRIRIQPMNRASFIDFRTARLPLQTPEIDDFDPSLQREPKNPIKL<br>WMAYFNLLRTVFGAGVLGLPLAISQAGIILGPILTIAIGFLIVHTRMLLRC<br>LNEVSRQLKIPYISYRYGFRIALLHGPICQFFGHFGPAIATFMILSQLGICT<br>VFVCFSTSDSLRDIMDWQSSQTALLALLPYLLLQFFMKTLKIVSYVSLMG<br>NLLNLIGLILVFYHIFDDPHGEYIDATTDALPVLMSIGSFLFNLSAVGVVLSL<br>DKALQNPVKVLTEKFGVLDIGILIPTLVATIFGVLYWVSGTMEENILRSLPY<br>DDDTAMAAIGLYLIAIAFAHPIQSYPGIILQIILEVIKNRDLMHPPSEQSMKLV                                                                                                      |

|                                   |                                                                                                                                                                                                                                                                                                                                                                                                                                                                                                                                                                                                                   |
|-----------------------------------|-------------------------------------------------------------------------------------------------------------------------------------------------------------------------------------------------------------------------------------------------------------------------------------------------------------------------------------------------------------------------------------------------------------------------------------------------------------------------------------------------------------------------------------------------------------------------------------------------------------------|
|                                   | MVVRPCFVLASFIICYLIPFQGPFIQVGNLCTTLLALVFPATMEICLMPYPGP<br>YGKYKIYLYKNLFIILGLFTWAYGVVLSGYLIYVRLVARSPNDLDT                                                                                                                                                                                                                                                                                                                                                                                                                                                                                                           |
| MsAAAP18<br>(MSEX2.104<br>25-RA)  | MPKNILAE LGSQVGLTPARQNKKEAE EWSRRQSGPKINPSFEPDDFVPHSL<br>SPVKDEKKRPGDAGIFMVMNMEKKNLQEV EYEPYDNRVVAHPTTNTETL<br>LHLLKGS LGTGILAMP HAFSNAGY MVGSIGTVVIGVLCTYCIHVLLDSTY<br>ALCKRRKVPSLTYTAAAEAAALSEGPAWCKACAPYAAHIVNVFLLIYQIGT<br>CCVYVLFVSENIKYVLTKKFGIDISLEHVMLCVLLPLILINWVRDLKYLAP<br>FSAVANAVTIVSFGIILYYIFRDTPSLEGKSAAGAISKFPLFFGTVLFALFAIG<br>MILPLENEMKTPKDFVGVKFGVNL RAMVTIILYVGMGLFGYLQYGN EAE G<br>TITLNLPTETEILASVVQGLLAFAIFITHGLACYVAIDIVWNDYVGNRLLNS<br>KHRIIWEYIVRTLIVLITFGLAAAVPALDLFISLFGALCLSALGLAFPFIQTC<br>TYWYYYVSRSERIRMLIKNIIVVLFVGLGLIVGTWTSLQGIIEKFCNTDSGLE<br>SVVNTTEASGFNGTTAH              |
| MsAAAP19<br>(MSEX2.104<br>10-RA)  | MTGERSGAGPTALRAFRGTGVSHREFPDSELRLNYILITNDRMVKPEKNNI<br>DLN NFSSTAELTAHPGFQSSINIISSKEDKPYNPF EHRMLEHPNTTIGSIVHL<br>LKACLGSGILAMPAAFKNAGLVTGSIGVLLAGFISTHTVHILVKTSQEVCV<br>DAKKPSMSYAETCEAAFNYGPKGVRK WGHFVKNVVDYSMV LAYISVLC<br>VYVVFVGS SFKETLDAYMPDNKLSIQTYCALTLVPLVLLCQIRNLKYLVPF<br>SAIANVLIFIVFAITLYYVFVDL PPLKEREMVAEVTQWPLFLSTVIFAMGSIG<br>VVMPVENEMAKPQQFLSCPGVLNITMIIVVALYGFVGFVGGYVQFGDQVK<br>GSVTLNLPQDELMAQSAKFLMALVIYLYALQFYVPM EWITRMLKKRES<br>DRYENVIQISIRIVIVSISVAVAAFPNLELVISFFGAIFFSTLGLLIPAVVDTV<br>YHWDKDLGKYNVVLWKNTILGIISLAALVSGTHGDQSQRKAARYAGDII<br>MRKSVRNQVHSLFLHSHSPVCICTNCFILKLIMDVIPV |
| MsAAAP20<br>(MSEX2.104<br>10-RA1) | MYSGYPKLCHVSKFTVRLITKDRMAKPAKNNIDLNNCSSTAELTAHPGFQ<br>SSISIENKEDKPYNPF EHRMLEHPNTTIGTIVHLFKASIGSGILAMPAAFK<br>NAGLVTGSIGTLLAGLICHTVHILVKTSQEVCVDAKKPSMSFAETCEAAF<br>TYGPKGVRK WGHFVKNVVDYSMV LTYISVLCVYVVFVGS SFKETLDVYM<br>PDNKLSIQTYCALTLVPLVLLCQIRNLKYLVPFSAIANVLIFVVF AITLYYVF<br>LDL PPLKEREMVAEVTQWPLFLSTVVFAMEGIGVMMMPMVNEMANPQQF<br>LGCPGVLNITMTVVIPLYGIVGFFGYVQFGDQAKGSVTLNLPQDELMAQS<br>AKILMALVIYLSYGLQFYVPM EWITRMLKKRESEKYENVIQISLRILIVTVS<br>VAVAAFPDLELVINFGAIFSTLGLLTPAVVDTVYHWDKDLGKYNVVL<br>WKNTIIGIIALVALVSGAYVSILGMVEEFGQQELEGSHSNVTSL                                                        |
| MsAAAP21<br>(MSEX2.104<br>11-RA)  | MRGKRFKMDDKIRLITNDRMAKSEKNNIDLN NFSSTAELTAHPGFQSSISII<br>SKGKEDKPYNPF EHRMVEHPNTTIGSIVHLLKACLGSGILAMPAAFKNAG<br>LVTGSIGTLLAGFICTHTVHILVKTSQEVCVDAKKPSMSFAETCEAAFTYG<br>PKGVRK WGHFVKNVVDYSMV LAYISVLCVYVVFVGS SFKETLDAYMPDS<br>ELSIQTYCALTLVPLVLLCQIRNLKYLVPFSAIANVLIFVVF AITLYYVFVDL<br>PPLKEREMVAEVTQWPLFLSTVVFAMEGIGVMPVENEMAKPQQFLGCP<br>GVLNISMVIVISLYGIVGFFGYVQFGDQVKGSVTLNLPQDELMAQSAKIL<br>MAFVIYLSYALQFYVPM EWITRMLKKRES DRYENVIQISIRIVIVTISVAVA<br>AAFPNLELVISFVGAIFSTLGLLIPAVVDTVYHWDKDLGKYNVVLWKNT<br>MIGIISLVALVSGAYVSILGMVEEFGHQELEGSHSNVTSL                                                        |



|                                  |                                                                                                                                                                                                                                                                                                                                                                                                                                                                                                                                                                                                                                                                     |
|----------------------------------|---------------------------------------------------------------------------------------------------------------------------------------------------------------------------------------------------------------------------------------------------------------------------------------------------------------------------------------------------------------------------------------------------------------------------------------------------------------------------------------------------------------------------------------------------------------------------------------------------------------------------------------------------------------------|
| MsAAAP22<br>(MSEX2.114<br>74-RA) | MINLGRFKIPPLKNALDVALQTVRQQMPDKPGPPRPPQNVRFANLDNMG<br>ESCELSTMNETQSPSYQSTNPTNPFLSGELQAEDSFTSYQNTYPQQDGAPR<br>TQSMQSVDFYASSEEGGFEEGGGKPGAKINEFQAAWNVTNAIQGMFVVS<br>LPFAVLQGGYWAIAAMVGIAHICCYTGKILVECLYEDDPVSGQRVIRDSY<br>VSIACECFGRKYGARIVNMAQIHELLMTCILYVVVCGDLMIGTFPDGSIDT<br>RSWMMLTGYFSLAFSILEVFKERQYAIILVYHEPFDHKRHCSWLLYTLHRR<br>LGLV                                                                                                                                                                                                                                                                                                                           |
| MsAAAP23<br>(MSEX2.118<br>54-RA) | MKRFLRVLSRGQYLLRMCSTVPQCVRTPRASCHRSTDPSYCHKHTTVCLI<br>LKIFCEGDVNEADGFRAAPRPPRARPGGSLKEGGVGAAGGAHSQCSRAS<br>QSRPRRCVVVSPSTYSDTTHCTTTTTYHRDLHTTLMVEDNKAETVHLR<br>AVAEQGQGEPPGGDQLTGDYDPHLHRNLPKPTNNWETLVHLLKCSLGTGI<br>LAMPQAFARAGLVTAVVSTVVVGVLVTHCLHVLVQSQAACKRLRVPLL<br>TYPESMAAALQAGPAPLRSLARPAAITVDVFLVVYQLGICCVYIVFIAENIK<br>KIVDPHYGMPVEVHMLIILVPLIAFNLPKLLAPFSALANVLTFVGLGIV<br>VYYLLAGKKSTQPLDLWGSPASFPLFFGTILFALTAVGVVIALENNMKTPK<br>SFGSACGVLNNGMSIIVLLYVVVGALGYVYCVSECSDSVTLDLPPGPLATS<br>VIVMFAVAIFISYGLHCYVPVEVVWRGYVLPRLQAAGVSAARRTLAEYAL<br>RVALCLITFVLAVSVPQLGLFISLFGALCLSALGICFPALMELCISFPDKSGA<br>ARLRLVKDAALFVVGVVGLLAGTYTALLGIIRTFQITPSSSTESPLHA |
| MsAAAP24<br>(MSEX2.118<br>55-RA) | MFIYEFMAGIVETITGGDEETYEPHAHRKVEKPTSYSDTMIHLLKGSIGA<br>GILAMPDAVCRLGIMYSIIGLLVCIFATYCIQLLIAAQYLCKRWRRGYIA<br>YPKSMRLALQDGPPCMRWAAGMSYFVDVTLVTWQLGICVIYFVFAEN<br>LKQVCDYYGLELSIRIHLSCLLAPLTVLNLVKDLKLLTPLSTISNVVTVFGL<br>ILVFFYLVEDDVTLEDEKLQMKRYEDIPVFIGITLFALEAVGVVLALEYNM<br>EHPRQFVGLFGLFNIGMAIICLLYLLGVFGYLKFGNEVEASITLNLPFNQK<br>KAQVAKVTFALAIFLSFPLQNFVGYNIMWRKIKKKINPSRQCPIDYTLRVV<br>LVIIPWLLAVAAPHLGPFIALFGALCSLLAMVFPVMDACLWYPDRYGLC<br>HYKLLRDIVIIIIVGMLCLVSGVYTSMLIEVES                                                                                                                                                                                  |
| MsAAAP25<br>(MSEX2.119<br>64-RA) | MTDDVSFESLRRTGISFQPD SHIPEVIANKYQVKATGEEARKYDFVTARPP<br>ARTTNVLESIGYLTKSCLGAGVVAIHESYKDCGLWTGLILNIVLGLAISYG<br>MYTLAKSAQKIYGRQLQIPALSYPDLAQATLEIGPWKSLKRFSKCFRYTVDF<br>ILHIEIAGCCCIYQIVVARAIKQLVEGLDVTDSRVGTSPSIRVYIISLMIPCILL<br>CMITNLKYLAPFSTVADFFIVIMAIATVYFAVKSANISPLEMSFFKSVPGVFE<br>FIGVCGFSMDGVGVILTIENTSMTEPKLPTVLIGGMTLVMLLVTTVGGFFGY<br>WFGENTTTPVTINFPWEPFPIIMKVFLALMIYITFGLNFWVACDVMWFY<br>LKS RHEPKKHWLWERYRAVLVVFITIVAAFPNVTKFIGLIGSFCLSNLGF<br>IYPAFIELSLDWEDPGPGVFYWRWLKFWVIFLWGLVLCIAGSYVNARELIIR<br>VFHKKNES                                                                                                                                     |
| MsAAAP26<br>(MSEX2.129<br>99-RA) | MEASLKYCSISGTLVLYLLIFVIVKGYAWGINVGTAWTETRAFKNAAVLS<br>GMLALSFYIHNIIDIMRNARQDKNGRDLTIAFLLVITITYTMVGAVFYICF<br>PLAKSCIEDNILNNFEMHDIMTAVARVLLLFQVVTVYPLVAYMLRTETMLL<br>LSLQETRCYTMNTIVIMCVLVACFCPNVGTIIRYTGAIISGLVHVFAVPSL<br>LQVRSLLRGRLTWWKSLFYFLIVVFGTVNLLMQFFITE                                                                                                                                                                                                                                                                                                                                                                                                   |
| NvAAAP1                          | MAYFRGFFIPSLSATMNVAWETIKAKWPENSPCMELIRGPGPGARPPPGAG                                                                                                                                                                                                                                                                                                                                                                                                                                                                                                                                                                                                                 |

|                      |                                                                                                                                                                                                                                                                                                                                                                                                                                                                                                                                                                        |
|----------------------|------------------------------------------------------------------------------------------------------------------------------------------------------------------------------------------------------------------------------------------------------------------------------------------------------------------------------------------------------------------------------------------------------------------------------------------------------------------------------------------------------------------------------------------------------------------------|
| (NV15949)            | YDQQGEYREGADGAEMAELNVDAGGSYNGDQRHVTMAEDSFSYQRSG<br>DKVRTGSVSSGFSEFDEGGGEGFGSGVKINEWQAAWNVTNAIQGMFIVSLP<br>FAVLRGGYWAIAMIGVAHICCYTGKILVECLYELDPATGQRRVRVDSYVS<br>IAKECFGPRVGARVVNIAQIHELLMTCILYVVVCGDLMIGTFPEGAIDTRSW<br>MMLIGIFLIPLGFLKSLHHVSVLSFWCTMAHLFINAIIIGYCILEIGDWGWS<br>KVKWSLDMKTFPISLGVIVFSYTSQIFLPTLEGNLIDRSKFDWMLNWSHIA<br>AAAFKSIFGWVCFLTFQNDTQQVITNNLHSAGFKGLVNFCLVVKAVLSYP<br>LPYYAACELLERALFRGKPKTLFPTIWTLDRELKVVWGLAWRVGVILFTIL<br>MAIFIPHSILMGFIGSFTGTMLSFIWPCYFHLKLRNSMETSQVAYDCFVI<br>FLGVLFGIIGVYDSGKELIRAFEIGLPF                                 |
| NvAAAP2<br>(NV18592) | MSRSEDTLPVHGGNFKKTQMRPMIAEYDPKKHGVKTELSDMVLVKYK<br>CEKNEVPITLTNGSTLPLVERPNDEEAALYNPFHRKLAHPTSMDMTLIHL<br>LKGSLGSGILAMPAAFKSAGLFFGLFATFFIGAVCTYCVHILVKCAHVLCR<br>RTQTPSLGFAEVAEAAFLIGPEPVQKYARLAKATINSFLVLDLVGCCCVYV<br>LFVSQNVKQVVEFYTPPEHHMDLRIYMAMLLPLLIVFSLVRNLKYLAPFS<br>MVANGLIAAGLGITFYIFTDLPAVSTVRPVASITEMPLFFGIAIFALEGIGV<br>VMPLENNMKTPTHFIGCPGVLNIGMFFVVTLYSTVGFFGYLKYQDKTQGS<br>ITLNLDEHDVLAQSVKLMIAAAIFFTYGLQFYVPMEIWKNIKHRFGARKL<br>AAEYAVRISLVIFTVCMAIAIPNLSPFISLVGALCLSTLGLMFPSIHELVTVWE<br>QENGLGRCYWRLWKNILIAFGVLGLLTGTYSIGEITAGPHPTPAAANLTD<br>ALVGH |
| NvAAAP3<br>(NV11499) | MSQDNYGFTGSTD SIDPKRQNPFFENNGSKYTAKDNSNFSVVELEDKRKI<br>AKELEGDYDPYKHREVQHPTTFWETLFHLMKGS LGTGILAMPKAFENAG<br>YVVG TIGTIIIIGLLCTY CIRVLKSEYELCKRRKVPSMTYPGTMQASLEEGP<br>KCLRRFSKYCPHICNTFLMVYQLGTCCVYTVFIAENLKKAMDNYVNPDI<br>DLRFYMLALLLPLILINWVRNLKLLAPLSTIANFVTFASFAILYLFRDPID<br>FTGRQTIGDVANFPLFLGTVLFLEAIGVIMPLENEMKQPKKFMNPCGVL<br>NIGMALNIIYVGIGFFGYIKYGDKVYGTITTNLPEDEVLSSVVQILLALAI<br>VTHSLQCYVAIDISWNEYIQPRMKHTSNLNQLIWEYVVRTCIVILTFILAVSI<br>P LLELFISLFGALCLAMLGISFPALIQICAFWKVKSSKERVFLATRNIIVILF<br>GLLGLVIGTYTSLEKIVIELGKMK                             |
| NvAAAP4<br>(NV16821) | MESMELHTKNATDMPDRLSKIAREIPLKDD SAGNGSSYGAFQSKDPILRL<br>DKDVEARSGGDDGHGTGSSHSTSYFETLMHHFKGNV GSGIFALGDAFKN<br>AGLV LAPPLTIFLGVICHAQHILLNCNQEVRRLGSSLETNPGYAATVELC<br>FATGPLALRKYSVFMRKL VNLFLCVTQLGFCCVYFVFISSNMQVMK VV<br>GVDLDVHVHMVIALIPILLSTWIRNLKFLVPLSSVANALIISGYIASIYIMCH<br>DLPPVSERRYIADWSKLPLFFGTVIYSFEGITLV LPLKNEMKKPKNFDRPL<br>GVLNVGMVIVGGMFVTIGFLAYLKYGDEIAGSVTLNLEPKEDMLQGEGY<br>TFYNSLPQCIKL AISLSILLTYALQFYVPVAIMWPEFVRQFGPFNYPVVGEV<br>LFR TILCIITFILAEAIQGLFISLVGAVSSTALALIFPPIISIVICWQNAKLDKI<br>TFIKDIFILTIGFLGCFTGTYYVSVTEIVQAFSEGK              |
| NvAAAP5<br>(NV16853) | MVEENLKAPTELDTFLPTDGSSLKDGALTAKYKVQV ASRDVETAAQRDG<br>KSFDPFTERKVS NPTTDCDTLTHLLKASLGTGILAMPVAFQSAGLLGVFA<br>TILVAFVCTHCAYILVKCAHVLYYKTRKTQMGFADVAETAFA SGPKWARP                                                                                                                                                                                                                                                                                                                                                                                                       |

|                      |                                                                                                                                                                                                                                                                                                                                                                                                                                                                                                                                                                             |
|----------------------|-----------------------------------------------------------------------------------------------------------------------------------------------------------------------------------------------------------------------------------------------------------------------------------------------------------------------------------------------------------------------------------------------------------------------------------------------------------------------------------------------------------------------------------------------------------------------------|
|                      | FAGPSRYLIQISLFITYYYGTCSVYAVIVAANFNKVISYYMTPTGEPLVEINPRI<br>IIAILLLPLILLSWIPDLKYLAPVSMANVFMGTGLGITFYLVKSIENFDN<br>VSYIAPISEFPNFFSITIFAMEAIGVVMPLNSMKTQHFVVICGVLNKGMS<br>GVTMIYILLGFLGYAAFPGKAEGSITLNLPTTEEIPAQIVQILIGLAVYCTFGL<br>QFYVCLDIAWQGLKDRFQKKPNLANYVLRTVLVTGSVLIAIAVPTIAPFIG<br>LIGAFCSILGLLIPVFVETVITYWDIGFGRFHWVAMKNVIICVIGLMALVFG<br>SSNAVKDILKEYAPKDAEDAISRNVNTNIAVNATAAVVNATV GALNTTVGN<br>F                                                                                                                                                                   |
| NvAAAP6<br>(NV16822) | MDLHTKNGTDTPGSLSQTISREISLKDVGARKDSGCGVFQSKDPIVQLDK<br>DIEARTGGDDVHGSGSSHPTSYFETLMHHFKCNVSGIFALGD AFKNAGL<br>VLAP TLMVFLGIICVHAQYILLKCNEEVRRRLGSSLEASPGYATTVELCFAT<br>GPLAVRKYSVFMRKSVNLFCLITQLGFCCVYFVFISSNVKQVMGVWGV<br>LDLHVHMAIMLVPILLSTWIRNLKLLVPLSSLANVLIVFGYVATIYVISHDL<br>PAISERRYVADWSQLPLFFGTAIYAFEGIALVLPLKNEMIKPNFDRPLGVL<br>NVGMIIVGCMFIAIGFLSYLRYGEEVAGSVTLNLPEKELLSQCICKLAISLSIL<br>LTYALQFYVPIGIMWPEFVHQFGPFNYPVVGEILFRITTFCLITFILAEVIPQL<br>GLFISLVGAVSSSALALIFPAIIEIVISWQDAKLNKFTFFKDIVILGIGFLGCF<br>TTYASIAEIIHVFNKGE                                     |
| NvAAAP7<br>(NV12580) | MGKKEEANEAPGEQMRDFSSTTKIAPVIGQYHEKDELYDPDHRDKKHT<br>TSDVGSATHLIKSSLGTGILAMP SAIKNGLLVGGIGTHIIGILCSHCVHILVR<br>SSHVLCRRTKTPQMTYAETAGAAFESGPLAVRKYAAFAKNLVN WALCATY<br>VGGACVYIVFIADA IKVLGDEYSIDIPKRTYMLCLIPAVLLGQIRHLKIL<br>VPFSVIANMSLTIGFSITLYYIFSDLKPLSEIHVYSTWAQMPKFFATVIFAIEG<br>IGTVMPIENSMANPNHFIGCPGV LNISM TVVISLYTMMGVFGYLSFGDDA<br>KGSITLNLPPGDILAQVVNIIALAVILTYGLQFFVPLEI IWN SIKHKF SHRW<br>EVLGETVMRILMVLLTVSVAMLVPRLEPFISLVGAIFFSFLGIFIPAVVETVS<br>CWECHLGT CNWRLWKNCF LALVAVCALISGTWISLLDIISLYTTPASGLVD<br>SGNK TIVNAAVQTILSTTLGVINSTTTLSPVDLTTTVSPVDVITLLP |
| NvAAAP8<br>(NV10096) | MESSEPKNSMNEKS YILDNSRKPFEDEDEPENSGKFTSLPLASFNFINSIIGS<br>GVIGIPYALHQAGFLGIALLVIVAILTDYSLILMVRSGHLCGEMSYQGLM<br>RASFG RPFYILTALQFIYPIAMVSYNVVVGD TVTKVLIRVTGLDPDSFIV<br>KREVVIFLATLLVVIPLCLYRNVAKLAKISFLSLVCVGFILLAI FIRMDSMSSI<br>VPSHPDSWKFGNIAGIVPAVGIMAFAMCHHNTFLIYGSIERATQEKWDVV<br>THWSLFTSFLIAAAFAGIAGYATFTGYVQGDLMENYCWDDDLMNFSRIMFS<br>GTILLTFPIECFVTREVIMTAIRGTDEVENHDAYIAGSDRKYLIITMAIISVAY<br>LISMSTDCLGIVLELNGILAAVPLAYVLPALCYLKLEEGSLLSQKLPALAL<br>LVAGVFAAVSGLLLLIFNNTSAASCVHGQIMSYCQSPNSTDVTSTTFKPSST<br>TASSILTSLLTSPASATTVTTTAATTAATSTLASTTTSTTTTLLPR     |
| NvAAAP9<br>(NV18067) | MISHIMTLANGIIGVSVLAMPFCFKQCGIVLATLVLLSSILSRLACHFLIKS<br>AVMCRRRNFEFLAFHAFGPMAKILVELCIIGFLLGT CIAFFVVVGD LGPQIV<br>GEMINKNPGDIRTSFLITTGIFIVLPLGLLRNIDSLASVSTASIAFYICLVFKVI<br>AESTHHIFAADWFDKVDYWRPAGILQCLPIFALALFCQTQLFEIYEAMPNA<br>TLEKMNQVVKGALNICTTVYISVGGFFGYVAFCTQPFTGNILMSFEPNLTSEI<br>IKIGFVLSVAFSFLVIFPCRASLNSLLFRRGYAHETTTSYITEARFRCLTTFI                                                                                                                                                                                                                          |

|                                  |                                                                                                                                                                                                                                                                                                                                                                                                                                                                                                                                                                                                                                                                                                                   |
|----------------------------------|-------------------------------------------------------------------------------------------------------------------------------------------------------------------------------------------------------------------------------------------------------------------------------------------------------------------------------------------------------------------------------------------------------------------------------------------------------------------------------------------------------------------------------------------------------------------------------------------------------------------------------------------------------------------------------------------------------------------|
|                                  | VIIALTIGVLPINIELVLGIVGSTIGVIIICLIFPAAFFISINTKNTNERLLAQILVF<br>TGVWIMILGTYANLYAIEQSSNSRVTATTMKLPSQINNMPHSLINKDMLHR<br>PDQPEQSDILIHNEVDAERLKPVPDKLPDDENVRQEPPVPERVPETEKL<br>KIKQEPNIFETVTISPKEIVDKINMDNELIKETNRGYDSLKKTKETNEL<br>PKKIEDNSIPVKDNDKTDGTGQKNDVIAVDAIKKEDSELAADKEMSNVDSV<br>QRREQLEKTLKKHLIEQKEMLQEQKELLKDIEQQKELQLDKKPEIVKEN<br>KKNEMIKENAEHHIGDELRVPIKANQVNVKADQVNEKLNNNQDTLQTKL<br>EMLGDGANSPIKSKDILLEVENSCKNEGIQNNEIPNNEKPIKNEQLDNIN<br>GPNNSNRNSSLVSNLNDGPDNVLIKKSEDPPIKALTRQSNKIANGNEVIDIPS<br>DDRKINVNLNDKKVEDKVRDKNDKYSIPIVLKMNNQTKLVLDSEHSSINK<br>SSPDVAGVGRDILEEHQREKRTISLETDTAKLNHETNSPDGKSNAMIEHSIV<br>DKEICTKDETKSENSNLNVKTEPRKSTEEPENLIKTSAYLSEQNIVKRVL<br>IDPDLNLGNNHVKLKKRDLKTLDFNEDSKK |
| NvAAAP10<br>(XP_016840<br>414.1) | MENKNGEVLNMQRVQNSCKANGLPDSGSLKPTAVSSSSLESPEYDPHQH<br>RNRPHPTTNTETLIHLLKGS LGTGILAMPNAFCNSGLVTGTVATVIIGILCT<br>YCLHILVKAQYELCKRLKVPILNYPQSMKVALEQGPPSLRKFHSSPIVD<br>AFLIVYQLGICCVYIVFVATNIKQVADQYCEPIDVKLHMLILLIPLTVINYIR<br>NLKLLAPFSSVANIITFVGLGMILAYVFDDLPSITEREMFGSVRNFSLYFGT<br>TLFALEAVGVIALENMKTQPFRGTGVLNVGMLVIVVLYILVGGFYI<br>KYGPDASGSITLNLPMDAVMAQSIKVMFAVAIFITYALQAYVPVEIHWTTYL<br>DHRIKKNLFWYIVRTLVTLTCTCKCTVCTKYNRSKNLPLFSAESISGGF<br>ESKRDSLQANSTHITAKGPPAKLTSSRPFRGR                                                                                                                                                                                                                               |
| NvAAAP11<br>(XP_008216<br>698.1) | MQKFECDTRNAQTGTDYDPEEHRPPEQLTTGTFAVFMHLIKAAGSGILF<br>LPYAFRRTGYLAAILCSIFIGTISIHTAVITVQCCQILCKRSHVPSLNFAETA<br>ASFKLGPEPFRKYAGAFALATNVIVCFVQYETAVVYSIYVASSFQQVFEYL<br>SGWNHQDVRIYLLVFLPIFCALSLIPNFKYLVPFTIIGSICLLLGFTTLYYMI<br>DQFPSPSRLEMYTDIEHLAIYCSVFLFAVHNMSMLMPLMENTMRHPRRMGL<br>VLGVSMIVNVIVNVTFGLGYNKYQNACDVIKLNPLDELPAQMVKVAV<br>SLSVLLTYGLQYYVPITILWPMIAKRIGNKRVYETFFRLGGVIACTSLAIAL<br>PHLAQLLGLFAALSMTTVMLLIPAMIEITTKWNDPGRARHYLMLVKNVFI<br>LFVWLMIMVFGTIENIRDILREYSGAEDPDAACG                                                                                                                                                                                                                          |
| NvAAAP12<br>(XP_001607<br>294.1) | MNYPSEEDNIIQNDIVLSTA AVENSTRESNPGRRQTAGTGS LGTIFLMVN<br>ATLGAGLLNFPEAFDKSGGVATAIIAQLFFLVFITATLVILANCGDVTNTTT<br>MQAAAFAGLCGPNLFFCGICVAIYSFGCCITFLIVIGDQFDRVFATLYGLDY<br>CHTWYLARPFVTCSSALFILPLSFFKRLDALNYASSIGCVTILYVWLVIVY<br>ESFDNYKLPKPMHIWPEEPLQVLQIVPIICFAYQSHMTAIPTYACMKDRQI<br>GKFTLCAIISMIVCFAYSIVGGFYATFGIGKVPDILQGYTDKSTTLTIAIV<br>AIAVKNFTTYPIVLYCGRDAILSLFGRDVDCQFSIRFTITIIWYALSIVAILV<br>PDIGPVINIMGSLSAAFIVFPGICLLQSTLYKDPLLHLNKDRFLVFIAIFITA<br>LGAFVCGVVFVEALQDLQTMSLDQPAKVTGFKAE LGSSLCQ                                                                                                                                                                                                         |
| NvAAAP13<br>(XP_008209<br>128.1) | MDNRPKRSNGGKSRQPPPGFYRKTLAQQQRDSGSESAPLLSSGCSHASL<br>DQPIIMFQDSETS DLSSTAGNSSRDGKEQCRSVIDRLVSTGGGINNYSIS<br>NLLPKRLPPLVNERVPSLNASLHADIERDKCYEIRNADLLEDDPFDLME<br>GRTEKGLLSDFFTQSLPMQGNIGDTEEIKPKQSSLVTIFSVWNTILGSSML                                                                                                                                                                                                                                                                                                                                                                                                                                                                                              |

|                                             |                                                                                                                                                                                                                                                                                                                                                                                                                                                                                                                                                                                                                                                 |
|---------------------------------------------|-------------------------------------------------------------------------------------------------------------------------------------------------------------------------------------------------------------------------------------------------------------------------------------------------------------------------------------------------------------------------------------------------------------------------------------------------------------------------------------------------------------------------------------------------------------------------------------------------------------------------------------------------|
|                                             | <p>TMPWGIYMAGFVPAIILILAMSGLCLFTAYKLLQVHKYHGGGERIEVMEL<br/> SRAFLGSWAEHMAKIFSISVLMGANIAYWILMSNFFYNSVNFLYDIIAGIPV<br/> LPDTYNRTDGDLLCPKYELNGTANYDKSYDNLGPAWDLYKTVPIFLALLV<br/> FPVLNFNTTFFTKFNSLGTVAIVYLVVFLVKSGSWGIMDKTAWQESW<br/> VLRSTFPVLSGMLSLSFFIHNIIITIMQSNRNQKKNRDLTIAYILVTITYIIV<br/> GIVFYVCFPLAKVCIEDNLLNMFQKNDGLTVGARVVLLFQLFTVYPLITY<br/> MLRIQLLSSVFKTTKRRRFVLLVNLIIVTICVLFMMPHVGTIIRYTGAIISG<br/> LVYVFTLPSLLHLMISYRQGTMTVMQVMCHACVPIIGVNLISQLFIQAN</p>                                                                                                                                                                            |
| <p>NvAAAP14<br/> (XP_001601<br/> 210.1)</p> | <p>MREDIPLLLSRKDSGLSLLFATLCVVDIFGVFPIIALPRAIVQCGWLGIPLVF<br/> VVFQFIYASLLGKSWNIANVVDPSISRKNRYPLAAVTELTGRRASKW<br/> VAILDLTVFAGGVPNLLVASYNLQLFGLKVSQMQLNSFCYWLLVVGVL<br/> LCPVMWLGSPRDMKWVVTISVCAVSATAVLIWWSIVHDQEPMNYSVPVT<br/> SPSWDTFISGYGMLAFQFDVHPTIMTVQVDMKKPKDINKAVIFSMISGTL<br/> FAVTAGLAVWRYGGNTSTNILQVMPPGIMVQTAILISAVQLCLSSAIGHASL<br/> FQHLEDQLRVDSSFSWKRCATRSIVFLGVALGESVPRFDIVMSLIGGTLV<br/> GPLVFLPPLMYSKARALCSASLRRTSAPEYLCSGPERRAGLAARELFADP<br/> RVHSRSTHFGRYGDDEKNDGYYFTYYEDEDQVEVNPYTESVECFVND<br/> SGARKKQSDDELSRSGSLPVMADASRPSVRPPRRQEALQNPANRPRNF<br/> CTKQRIIDWFGYCVAFVTGILITVSSTYINIRNTIRYVQFIPPCIVNATANIPEL<br/> G</p> |

**Table S10.** CDS sequences of the AAAP transporters of the *B. tabaci*.

| Gene    | CDS sequences                                                                                                                                                                                                                                                                                                                                                                                                                                                                                                                                                                                                                                                                                                                                                                                                                                                                                                                                                                                                                                                                                                                                                                                                                                                                                                                                                                                                                                                                                                                             |
|---------|-------------------------------------------------------------------------------------------------------------------------------------------------------------------------------------------------------------------------------------------------------------------------------------------------------------------------------------------------------------------------------------------------------------------------------------------------------------------------------------------------------------------------------------------------------------------------------------------------------------------------------------------------------------------------------------------------------------------------------------------------------------------------------------------------------------------------------------------------------------------------------------------------------------------------------------------------------------------------------------------------------------------------------------------------------------------------------------------------------------------------------------------------------------------------------------------------------------------------------------------------------------------------------------------------------------------------------------------------------------------------------------------------------------------------------------------------------------------------------------------------------------------------------------------|
| BtAAAP1 | <p>ATGGAGATGAAATCTTCTGAAAGTGCCTCCAACGTGACTCAAGTCATGA<br/> CAAGAAGTCAACAGGAGAAAGTATTTCTCCCCGTCAGTTCAAACACGC<br/> AACATCAGATTTTCGAAACGTTTCTGCACATAGTAAAAAGTTCACTAGGCT<br/> CTGGCCTACTAGCGACACCGGATGCCTTCAAAAATGCAGGTATCGGCCTG<br/> GGATTGGTTGGTATGGCCGTAGCTGTTCTGGTGATCACTCATGCTACCTC<br/> AATTTTAGTTAGGAGTTCTCAAGCAATATGTTGCACGCTGCAAAAACAC<br/> ATTTAACGTATGCTGATACAGCAGAATATGCCTTTGAATATGGCAACATTC<br/> CTGCAGTCAGACCGTATGCCGGCTTTGCGAGGAAGTTTGTA AAAAGTGT<br/> CTCGGTAATTACGTATTACGGTGTAATAACAGTTTATGTAGTGTTAATAGC<br/> ATCATCCGCAAAACAGCTCATAGAGAACCATATAGAATGGTCTTTGAACA<br/> TCCGGTGGTATATTCTTCTAGTACTCGTGTGATACTACCATTGGGAATCAT<br/> TAAGCTCATGAAGTTCTTGGCGCCCTTCTCTGCCATAGCGAACGTATGTC<br/> TCTTCGTCGGTCTAGGAATCATTCTTCAAAATCATGGACGATCTCCAC<br/> CTCTTTCCGAGCGACCTTTTGTGCTCCCATCGAGAAAGTCCCTCTATTCT<br/> TTGCCACCATGTTATTTGGACTAGAGGGTATCGGAACTGTCTTACCAGTT<br/> GAAAATGAAATGAAAATCCCGATCATTTCTAGGATGGACCGGGGTGTT<br/> GAGCGTGTCCATGTTCTTCATCGGCCTCGTCAATGCCATCGTCGGGCTCT<br/> TCGGTACTGGAAGTACGGCGATGCTGTGTGCGGCAGCATCTCATTGAAC<br/> ATGGAGCAAGACTGGCTCTCTGAATTAGTCAAATTCCTTATCGCAGTGGC<br/> TATTTTGTTACATATGGCCTCCAGATGACGGTAACCTCTGAAGTTGTTTG<br/> GGATAGTGTACAGGATTATTTTCATAAGGACAATTCAAAGTAGCTTATTA<br/> TTGCGTAAGAGCGTCCCTAGTCGTTGGCACAGCTATTGTTGCTGCGATAA<br/> TACCAAATCTCGCCCCTATCATATCTCTGTTTGGTGGCATTGGTTTCTCGA<br/> TGTTGGGACTTTTCTGCCCGCTGTGATAGATTTTCGTGCTGTTTACGATG<br/> TTGAGAAAGGCCTAACGGACTGGCGCTGTTGGAAAAATATTCTGCTCATA<br/> ATTGCCGCTTTTTCGGCTACATTCCTCGGCGCTTACACGAGTTTGGCCGAT<br/> ATCATTTC AATTATAGTTGA</p> |
| BtAAAP2 | <p>ATGTCCGAGCTAGACGTAATTCAGTTTTTCGTTTTTCCAGGAGCCAAGCAC<br/> AGGCGAGCCGCAGGCCACTGAGCTCGACACCTTCCTTCCCCAAGATGGA<br/> TCTAACAAAGATGGATCATCAGCAAAGTACAAAGTGCAAGTGCTGCCAA<br/> CGCGGCCGCGGGACGCGGAGGCCCGCCGAGGGACCGGGCACCACGAG<br/> AAGGGCTACTGGGACCCGTTCAAGGAGCGGAAGCTAGACCACGCCACC<br/> ACCGATGGCGAGACGCTCACCCATCTCCTCAAGGCCTCCCTCGGCACCG<br/> GGATCCTGGCCATGCCGGCCGCTTCAAGAACGCAGGGATGATCACCGG<br/> CATCTTCGCCACCATCATCGTCTCTCTCGTCTGCACCCATTGCTCATACTG<br/> CCTGGTAAAATGTGCACACTCGCTGTATCATAGGAAGAAAGTGACTACA<br/> ATGACCTTTGCAGATGTGGGAGAGGTTGCTTTTGCGAACGGACCTCCAT<br/> GGGGCCGGAATTCTCCAAATGGGCTAGATTCTCCATTCTTTCGGTCTAT<br/> TCTTAGCGTACTTCGGAACATGCAGTGTCTACACTGTTATCATAGCCAAA<br/> AATTTCAAGATTGTGATAGAGCATCATTCTCACTACAATGCAGACATACG<br/> GTTTTACATAGCGGTTCTGCTTGTCCCTCTCATTCTGCTCAGTTGGATCCC</p>                                                                                                                                                                                                                                                                                                                                                                                                                                                                                                                                                                                                                                                                                                                                   |

|         |                                                                                                                                                                                                                                                                                                                                                                                                                                                                                                                                                                                                                                                                                                                                                                                                                                                                                                                                                                                                                                                                                                                                                                                                                                                                                                                                                                                                                                                                                                                                                                        |
|---------|------------------------------------------------------------------------------------------------------------------------------------------------------------------------------------------------------------------------------------------------------------------------------------------------------------------------------------------------------------------------------------------------------------------------------------------------------------------------------------------------------------------------------------------------------------------------------------------------------------------------------------------------------------------------------------------------------------------------------------------------------------------------------------------------------------------------------------------------------------------------------------------------------------------------------------------------------------------------------------------------------------------------------------------------------------------------------------------------------------------------------------------------------------------------------------------------------------------------------------------------------------------------------------------------------------------------------------------------------------------------------------------------------------------------------------------------------------------------------------------------------------------------------------------------------------------------|
|         | <p>TAATCTGAAGTACTTAGCGCCGATTTCTATGCTGGCCAACCTTCCTCATGGC<br/> CGGTGGTCTGGGCATAACTTTCTGGTATCTTGTTTGGGACTTGCCAAGTG<br/> TCTGGGAGCGCCCCAGTTTGCCTCCTGGGAGACCCTGCCTGATTTCTTC<br/> AGTACGACTATCTTTGCCATCGAAGCCATTGGTGTGATAATGCCTTTGGA<br/> AAACGCCATGGAACTCCTCAACACTTCGTTGGCATTGTGGTGTTCTTA<br/> ACCGAGGGATGAGTGGAGTTACGATGATTACATCTTACTAGGTTTCCTT<br/> GGTTTTCTCAAGTTTGGAGACGCTGCTCAAGACAACATCACAAATAACT<br/> TGGATATCACACAAATAGCTCCTCAAGTTGCCAATATCTTCGTAGCAATTG<br/> CTGTTTTCTGCACATTTGGTCTTCAATTCTTCGTATGCCTAGAAATTGGCT<br/> GGGATTCTGTCAAGGGCTACTTCCGAAGAGACAAAGATTCTACAATTAT<br/> ATCGTCAGAACTGTGCTTGTTTCAGGAGCTGTGTTCTTGGCTATTGCAGT<br/> GCCAACAATAGGCCATTCATCAATCTAATCGGAGCCCTCTGTTTCTCACT<br/> CCTGGGGCTCATAATTCCTGTTTTCAATTGAATTCGTGACGTATTGGGACGT<br/> TGGATTTGGCTCCTTCAATTGGATAGTGTGGAAGAATATCCTAGTCCTCAT<br/> TTTTGGAGTTTTAGCCCTAGTCTTTGGCTCGGCCACTAGTATCAAAGGGA<br/> TTGCGGCACTGTATGCCCCGCAAGGTCCTGTGGCTGATGGATTCAACAA<br/> GACTTTAGAAAACCTATCAAGTTACAACACAACAAGTGTTTGA</p>                                                                                                                                                                                                                                                                                                                                                                                                                                                                                                                                                                                     |
| BtAAAP3 | <p>ATGAGTGATAACACTCCTCTGCGCATTTTGAAAACCAACTGGGCATAAA<br/> ATTGAAGAAAATGAAACCGGAAGAACGGCAACCTCTCATTGGGGTGGCC<br/> TACCCCATCCCATCAGTGAAAATTTGATGATCGAGCCATGCCGAGGCC<br/> AGATATCAGAGATTCACCAGAAAACCTGAGCGTGAATATTGACGGTGGA<br/> CCAATGAACGATCAGTTTGTCAATGCAACGAAAGAGGAGGAAGTTAAGA<br/> ATGATTTTCAATCGGCAAGGGATTTAGCTCATCCTACTTCGAATTTGGATA<br/> CGCTCATACATTTACTGAAAGGTAACATTGGGACTGGCATCCTTGCAATG<br/> GCTGATGCATTCAGAAATGCTGGTCTTTACCTTGGGCTAGTGTGTACCCT<br/> TTGTCTGGGAGCAATCTGTACACATTGCATGCATATGTTGATTGGATGTGA<br/> AAAAGAGCTATGTGAACGAACCAGCGTTCCTGCCCTGGACTTTGCGGAA<br/> GTTGCAGAGACAGCTTTTGCGACAGGTCCTGAAAGGTTACGGAAATTTT<br/> CAACTGTGTTTAGAATGCTTGTAATACATTTTAAATCATAACTCAGATTG<br/> GGTTTTGCTGTGCCTACTTCGTTTTTGTCTCGCAGAACTTGCATGATGAA<br/> ATAAAATATTTCTTCTTCGATATCGAGCTTATCTGGGTGCTGATACTTATGC<br/> TCGTTCCAATGATCTTATTGAATTGGATAAAATCACTTAAGTATATGATGCC<br/> GATTTCCCTTCTGGCATCCATCCTGACAACCTCAGGCTGGGCATCATTTT<br/> CTACTACGTGCTGCAAGATTTGCCAACACAAATACAGTTCCCAAGGTTG<br/> CGTCTTGGGGTCAGTTACCTCTATATTTGGCACTGCTGTTTATGCCTTTG<br/> AAGGCATCGGTGTTATCTTGCCTTTAGAGAATAGTATGAAGAGTCCAGAA<br/> CATATGAGAGGTTACGTTGGTATTCTCAACACTGGAATGGTAATTGTGAC<br/> CTGCCCTACACAGCAGTTGGATTCTTCGGCTACCTCAAATATGGTGATG<br/> CGGCGACTCGAGGCTCTATTACCTTCTACATGGGTGCTGAACTATTTGCTT<br/> CTCACGTTGTGAGATTAACCATGGCTCTGGCAATTTTCTCTCGTACTGTC<br/> TTCAGTTTTATGTTCTGCAAATATCATTTGGCCTCAATTAGTGTCAAGGT<br/> TTGCATTCCTCCAACCAGAAGAACGCCAGTATTTGGAGAGTACATTTTC<br/> CGTACTTTGCTGGTTCTTTACATTTTTGTTGGCTGTAATCATTTCCCGATC<br/> TAAGCGCAGTTATTTCTTGGTTCGGTGCTGTGAGTAGTTCTACGCTAGCC</p> |

|         |                                                                                                                                                                                                                                                                                                                                                                                                                                                                                                                                                                                                                                                                                                                                                                                                                                                                                                                                                                                                                                                                                                                                                                                                                                                                                                                                                                                                                                                                                                                                                                                                                            |
|---------|----------------------------------------------------------------------------------------------------------------------------------------------------------------------------------------------------------------------------------------------------------------------------------------------------------------------------------------------------------------------------------------------------------------------------------------------------------------------------------------------------------------------------------------------------------------------------------------------------------------------------------------------------------------------------------------------------------------------------------------------------------------------------------------------------------------------------------------------------------------------------------------------------------------------------------------------------------------------------------------------------------------------------------------------------------------------------------------------------------------------------------------------------------------------------------------------------------------------------------------------------------------------------------------------------------------------------------------------------------------------------------------------------------------------------------------------------------------------------------------------------------------------------------------------------------------------------------------------------------------------------|
|         | <p>CTTATTTTTCCACCACTATTAGAGATGGTAACATTTTACGAGAAAGACTTC<br/> AGCTACCGGACGCTCATCAAGGATCTGTTAATAATGCTTTTTGGCATATGT<br/> GGATTCCTTGTAGGGTCTTACACTTCCATATTGAACATTCTCAATCCCCCG<br/> GAAAACCTCTTTAG</p>                                                                                                                                                                                                                                                                                                                                                                                                                                                                                                                                                                                                                                                                                                                                                                                                                                                                                                                                                                                                                                                                                                                                                                                                                                                                                                                                                                                                                           |
| BtAAAP4 | <p>ATGCCTGGCCCTGGCGGCGAGCTAAAAATGCACAACATAAGCCAAAATT<br/> CTCCGGAGGGAGGAAACGGGCACAAAGTACAACGAATTTTCAATAAACGT<br/> TCCACCTCATGAGTCACCCCGGATGGAGATTATGATCCGCACACACATC<br/> GAGTTTTAGACGCACCCACAACACTAACAACGAGACGCTAATCACTTGCT<br/> GAAAGGAAGTCTTGGAACGGGAATTCTTGCCATGCCAAAGGCGTTCTAC<br/> CAAGCAGGTCTCCTCATTGGAACAATTGGCACAATCCTCATAGGATTTTT<br/> ATGTACATATTGTCTTCACGTTCTCGTTCGTTCCCAGTACATCCTGTGTAA<br/> ACGGAAACGAGTTCCAATCCTTAGTTATCCTGACTCAATGAAAATTGCCT<br/> TGCAAGAGGGTCCCTCGGGATTGAGGATGTTTGCTGACGCTTCATATGTC<br/> ATAGTCGATGGGTTCCCTCATTGTATATCAACTTGGAAATTTGCTGCGTTTAC<br/> ATCGTTTTCGTTGCAACTACCGTAAAGCAGGTCGCTGACGAGTTAGCTGA<br/> CCCGATCGATCTACGCGTGCACATGCTCATCCTGCTCCTCCCTCTGATCCT<br/> CATCAATTACGTTCCTAATTTGAAAATGTTAGCGCCTTTCTCGCAAGTGGC<br/> CAACTTCATAACTTTTGCCGGATTGGCGATAACGTTGTACTACATCCTCCA<br/> AGATCTGCCACCGGTGTCGTCGCGGCCGTTAGTCGGTGAGCCCCGAAAC<br/> TACTCTTTTTGTGCGGGACTACGCTTTTCGCTCTCGAAGCTGTTGGAGT<br/> GATGCTAGCATTGGAAAATAACATGAAGACCCCTGCGTCTTCGGTGGCT<br/> ATGGAGGTGTACTIONAATAAGGAATGGTCATCATCGTGTTCCTGTATGTG<br/> GCTATGGGTTTCCCTGGATACGTCAAGTATGGAGAGCTCATTGCCGGAAG<br/> TGTCACTTTGAATCTGCCCAAGGAATGCTTGCACAATCTGTGAAATTGA<br/> TTTTTGCAGTGGCCATATTTATAACATACGCCCTTCAAGCATATGTTCCGG<br/> TCGACATCATCTGGAGAACATACATGAAGCAGTATCATAGCCATAAAAAT<br/> AAAATGTTGATCGAGTACATTCTCAGGACGGCAGTTGTACTCATAACATT<br/> CGTGCTAGCCGTGCTGATCCCGCGGCTGGAGCTGTTTCATCTCCCTGTTCCG<br/> GGGCGCTGTGCCTGTCGGCGCTGGGCATTGCGTTCCCGGCCATCATCGA<br/> GCTGTGCGTCCTGTGGCCAGACCAATTGGGCACTCTCAACTACGTCCTCT<br/> GGCGGGACGTCTTCTCGTCGTCATCGGGATCCTTGCCCTCGTCATCGGC<br/> ACATCCATCAGTGTTAACGATATCATCGTGTCTTCCAATGA</p> |
| BtAAAP5 | <p>ATGCATAGTAATTCAGTCATAACGCTGTCCAACAGCATCATTGGTGTGAG<br/> CATACTTGCTATGCCATTTTGCTTCCAACAGTGTGGGATCATTTTGTCCCT<br/> CATCATTTTATTTTTCATCAGTATCATATCACGACTTGCTTGTCAATTTCTC<br/> CTGAAATCAGCAGTAATTTCAAGATGTAGAAGTTTCAATTTCTGGCTTT<br/> CCACATGTTTGGACCAGCTGGTAAAACAGTGATCGAATTAAGCATTGTGG<br/> GTTTTTTGATGGGATCTTGTGTCGCATTTTTTGTGGTTGTCGGCGATTAG<br/> GTCCTGCAATAGTCAAAAGTGTGTTTGAACCTGGAAATGTCTGTTCAAGCT<br/> CTCCGTCCAGCTCTATTAATTGGTGTAGCAGTTTTTCAATTTTGGCACTG<br/> GGACTGGTCAGAGACATTGACAGTTTGAAGTTCTATCTGCACTCTTTCCAT<br/> AGGTTTCTACATAATATTAGTTTTGAAGATAATAGCAGAGGCAACTCCACC<br/> TATTTTTGACTCTTCTTGGGCGGACAAAGTAAACTACTGGCGACCAGCTG<br/> GAATTCTCAATGTCTGCCAATTTTCTCCTCAGCTCTCTCATGTCAAACGC</p>                                                                                                                                                                                                                                                                                                                                                                                                                                                                                                                                                                                                                                                                                                                                                                                                                                                                                                                     |



AACTTTTTGAAATTTTCGGAAGTTATTTGAATGGGCCATTAGACAAAATA  
AACGGTGAATAAAATCATCAGTCAACATGTGTACAGCAGTATACATGGG  
TGTCGGACTTTTTGGATATATTGCCTTCTGTAGTCAACCTCTTACTGGTAA  
TGCCTTGATGAATTTTCCTCCATCTGTAAGTGGAGATATCATCAAATTAGG  
ATTTGTTGTCTCTGTAGCTCTCAGTTTTCCGCTTGTCATATTCCCATGCAG  
AGCCAGTCTTTACTCATTFTTTGTATCATCAGAATCATTCCCTCTCACTATGA  
ACTTTTAACTCGAAATACTGGTGGTTCGAGTCAAATGTCCTGACGCTAT  
TGATTGTAACGGTTTCACTGATCCTTGCTTTACTGGTTCCAAGTATTGAGC  
TAGTTCTTGGACTTCTGGGATCCACCATCGGTGTAATTCTCTGTTACATTT  
TACCTTCAGTGTCTTTACTAGACTGTTGAAGAAAAACACTAATGAAAGG  
CTTTTAGCCCAGGTTGTGATTATTGTTGGGGTTTTTATTATGGTGTGGGA  
ACTTACACCAACTTATTTGCAGCAGAAAAAGCTATTTCTGGTCCAGAGAA  
AGATATGCAGCTTAATATTGCTATTTCTCCTGAAAAAGAATTTCCATCGGA  
GATTAAACATGGTTTGGAAGAAATGAGAGAACACAGTATGGAAGCATTT  
CATAATGTGCCGGAGAAGTTACACCTTGACCAGGCAAACCTTGGACTTGA  
AAGAAAATGCTGACCAGGTGAAGGAAAGTGATGATAAAAAAATCAAG  
TCAGTTTGGTTGATAGCAACAAAGACTTGGACCAAAGCCAAGGTGATGC  
CAAGAAGGAGCCAGTGAAAATAAGTCAGAGAACCTCATGAAAGCAAC  
ACGGAAAGAACCACCAGAACCTGTTGAGCCTGTTGAGACAAAACATTTT  
GACAATCCCCAAAAAATTGAAGTTGATGCAAATTTGAAGCCCGACTTAC  
CTGAAAATATGAACCAAGCAAAGTCTGAGGCAGTAAAAAAGAATCAT  
TGTAGATCAACCAAAAATAGTGGCTGATGAATCTCTTAGACAAGAGAAG  
CCTGCCGAAAAGCAGGTAGAATCTCCTAATGAAATCAATGTTCCAAAA  
AGGATAAGGAAAAAATATACATCCCAAAAGGAGGGAAGATTTTCAAGAA  
GCTTCATGAAATCCCCCAAAGAATCCTCCTTCAAAGAAAGATAGTGTTG  
TCAACAATGTGAACCTAGAAGGAAATCTACGACCAGAAATTATGGATAA  
ATTAAGATACTCCTCCATTGCCGATCGCTCTTCAGAAAAATATCAATGT  
TTTCAATGTCTCTCATAACCAGAAAAACACCAGAGAATGACGATAAG  
GTCAAGAATAGAGAGCTGTTGGATCATCAAAACAAAATGAGCCTCACC  
CTCGAGAGCGGAGAGATGTGCTGACTCTGGCTGAAGAAGAGTTATCCAA  
TGGTAAAGGAATAAGTGTCAAAGGCATTCATGAAAATGAGGGCTCTGAA  
ACTGTAAAATTAGTCACAAGGAGCTTAGGTTCTGTTGACACAGATGTGAT  
TGAAAACCTCAGAGAAAGTTGTGTTAATACTCTCTGAGGTAGGGGACAAG  
GATCTAAAAATGAAGAATAATGGAGAGAATGAGACCTCAGACAAGTCGC  
ATTCCAGTCTGTCAGCTTCGAAGGCAGATTTTATTCTGGACGTTGAAGAG  
GAATATCAGTCTGCTAGAAAGTTAAGCCCCGATTTTGGCAATCAAAGTC  
TGCCAAGTTTACCGCTAAGCCAGAACAATCTCGGAAATAAATTAATTG  
ATGAATCAACTCAAACTTAGATTTTAGCCCAGATATCCAAAATCTGAC  
CAGTTTGCTATAAAGTCAGATTTTAATTTTGATAATCAAAGTCTGGTGG  
TCTTCTGTTAAGTCAGTTGTTGAGCCAGGTTCTCAAAAATATGACGCCTC  
TATCCCAAAAACAGATTTAAACATAAGCTTCCATCAAAGCGATGAATCCG  
CTCCAAAGTCAGATTTAAATTTTGACAATCACAAGGTATGCCTGAAGTG  
AAAACCTCAAATCCATTCCAAGTTCTGATTCTAATTTGGTGAACCTACA  
GAGTCTCCGGAACCTCAAATCACAACCTCTGCTCCAAGTTCAGACTCC

|         |                                                                                                                                                                                                                                                                                                                                                                                                                                                                                                                                                                                                                                                                                                                                                                                                                                                                                                                                                                                                                                                                                                                                                                                                                                                                                                                                                                                                                                                                                                                                                                                                                                                         |
|---------|---------------------------------------------------------------------------------------------------------------------------------------------------------------------------------------------------------------------------------------------------------------------------------------------------------------------------------------------------------------------------------------------------------------------------------------------------------------------------------------------------------------------------------------------------------------------------------------------------------------------------------------------------------------------------------------------------------------------------------------------------------------------------------------------------------------------------------------------------------------------------------------------------------------------------------------------------------------------------------------------------------------------------------------------------------------------------------------------------------------------------------------------------------------------------------------------------------------------------------------------------------------------------------------------------------------------------------------------------------------------------------------------------------------------------------------------------------------------------------------------------------------------------------------------------------------------------------------------------------------------------------------------------------|
|         | <p>AATCTAGGCAATGAAAGGAATAATTCTGCTTCCAAGTTAAAATCAATGTC<br/> TGACAATGCATCAGGAGATATCACACTGAAAGAACTTTGAGAAGTGTG<br/> AATTCAGTCGAAATGAAAGGAGTGGATTTCATGTCCAAAAAATCAAGTG<br/> CTAAAAAATCTATTCAACCAAATAGAACGTCAAACCTCAAGCAAGAGTAA<br/> TTCATCAGATAAACTCTTGAATATTCAAGCTCCAGATAGGCTGTCAAGTC<br/> CTGATAACATATTTAATGATATTGAATCAGTGAACGTTGAAATTAGCAACG<br/> CTTTTCACGATGTTCCAAAATCATTCAAGCGTGACTTAAAATCTGTGAG<br/> CTTGTGGCTGAAAATGACGAGCAAATACTTGATAACATTCTTAGTGTAAG<br/> GAAAGAAATAGATTCTATTAGTAAAACAATTGAAATTTAAAATGACAGGT<br/> AG</p>                                                                                                                                                                                                                                                                                                                                                                                                                                                                                                                                                                                                                                                                                                                                                                                                                                                                                                                                                                                                                                                                                                                          |
| BtAAAP6 | <p>ATGGGTAACGAAAAAATGGAGAAGGGGGAGTACCTAGAAAAAACCCAA<br/> TCAATGGTTACCATTGATGGAAGTTTTAACACCTCCTCTACACTGAAATT<br/> GACTGATAATGGAACGAAAAAAGGCATCGAGGCCGACGACACGTACGA<br/> GCCTTTTTTCGAATCGAGATATGACGCATGCCACATCGAATTCGGGTGCCT<br/> TCTTTCACTTGCTCAAAGTAGTTTAGGGTCTGGCATTGCGGATGCCG<br/> AACGCTTTCAAAAATGGCGGTCTCATATTTGGAATTGTCCGAAACGATACT<br/> CACGGGAATTATTTGTACATACTGCGTACACATGCTGGTCATATGTTTCGA<br/> AATTTTATCAGCCCGTGTGAAGAAACCTACGCTAGGCTTCGCAGAAACG<br/> GCAGAGGTCGCTTTTCAAACGGGACCAACCAAGTATAAAACAATGGGCTG<br/> GTTTTGCAAGAGAGTTCGTGTATGGAGCTCTATTTGCAACGTATTATTTTG<br/> GAAATACGGTATACGTAGTGCTTATCGCAACATCGTTTAAACAGGTGATG<br/> GACAGCAATTTGGGACTAGACTGGGACATTCGGATTTACATCCTCTTCTCCT<br/> GGCCCTTCCACTGGTTCCCGTGGGAATCATCAGGACTCTGAAATACCTCG<br/> TGCCTTTTTCCGCGATGGCTACAGTTTTTCATCATGGTTCGGGTTAGGGTTCA<br/> CGATCGCCTACACGCTAGAGGATCTACCCCGGTCACAAGCAGGCATTAT<br/> TTCACATCGTGGCACCAGCTGCCTCTGTTTTTCTCGACCGTGCTTTTTGC<br/> CATGGAGGGCATCGGAACGGTGTATCCCATCGAGAATTCGATGAAAAAC<br/> CCCGGACACTTCTTGGGCTGCCCGGAGTCCTGAACATCGCCATGATCAT<br/> CGTCGTAAATCTGTATGGATGTGTTGGCTTCTTCGGATATTTGAAATACGG<br/> AGATGAAACGAAAGGCAGCGTCACTCTCAATCTACCTGCAACAGCATTAA<br/> GCTGAGAGCATAAAAATCCTCGTCGCTCTGTGCGATTCTTTTCACGTACGG<br/> ACTTCAGTTCACCGTGCCGACCGAAATCGTGTGGAAAAGGATCAGCCAT<br/> AAATTTTCGGAAGAAAATCAAGAAAAAGGGTACTATATCATGAGAGCGT<br/> TCATGATTCTGGGCACAGTGGTGGTAGCGGCGGCGATCCCGAACCTGTC<br/> GCCGGCGATCTCCCTCGTGGGCGCCATTTGCTTTTTCGACGCTGGGCCTCT<br/> TCTGTCCGGCGATAATCGAGACGATCACCTTCTGGGACGATGACGTCCGC<br/> ACGCCGGGCATCCCGTGGAGGTGGATCAAAAATATGGTCCTCGTCGTCG<br/> TCTCCATATTCGCTCTCGTTTTCGGGCACCTACGCCAGCATCATAGAAATGA<br/> GTCACGAGTACTCGTAA</p> |
| BtAAAP7 | <p>ATGGAGCGGTTGAAGGATTCCGTACAGCCGGATTACCAGGCGACCAGTC<br/> CTCGAACTCCCCTCCGCATCAATGAGCCATCGAACGACAGTGCATCTCCT<br/> TCCACTAATGCAAATGCAAGAAGTCCTAATTTTGAACTGGAGCTCCTCA<br/> GAATGCCGGAATCAATGTTCTCACCGCAGCCGTCTTTGTGGCAGGAGAG<br/> ATGGCAGGAAGTGGTGTACTTGCATTACCCAAAGCTGTCGTAGATTCCGG</p>                                                                                                                                                                                                                                                                                                                                                                                                                                                                                                                                                                                                                                                                                                                                                                                                                                                                                                                                                                                                                                                                                                                                                                                                                                                                                                                                                                  |

|         |                                                                                                                                                                                                                                                                                                                                                                                                                                                                                                                                                                                                                                                                                                                                                                                                                                                                                                                                                                                                                                                                                                                                                                                                                                                                                                                                     |
|---------|-------------------------------------------------------------------------------------------------------------------------------------------------------------------------------------------------------------------------------------------------------------------------------------------------------------------------------------------------------------------------------------------------------------------------------------------------------------------------------------------------------------------------------------------------------------------------------------------------------------------------------------------------------------------------------------------------------------------------------------------------------------------------------------------------------------------------------------------------------------------------------------------------------------------------------------------------------------------------------------------------------------------------------------------------------------------------------------------------------------------------------------------------------------------------------------------------------------------------------------------------------------------------------------------------------------------------------------|
|         | <p>TTGGATAGGAATTTTCATCGTGATCATCTGCTGCATCAATGCAGGGTACGG<br/> CGGTTCTCGTCTTGGAGAGTGCTGGGCAATACTGGAGGAGCGGTACCCT<br/> GAGTACAGGGGGAACACACGCAACCCGTATGCCACTATTGCAGAAAGGG<br/> CTGTTCGAAAGTGGGGCAGTTACTTAGTCTCTGTGTGTATGCAGATCACG<br/> CTATTTGGTGCCAGTATCGTGTATCTCTTGCTGGCAGCGCAGTTGGTTCA<br/> AGATCTCCTCATTGTGGTGTTCCCGTCCGGTTGGTTTCTGCTGGTGGTTTCT<br/> CATCTTTGCTGTGGGGCTAATACCGGCCATGTGGCTGGGTTACCCAAGG<br/> ACTTTTGGTTAGTGGGAGTTGGAGCACTGCTTTCGACGACTGTGGCTGTT<br/> GTTTTCATAGCCACGCAGATGTTGATCGACGGTCTGAACCTGGAAAAGC<br/> TTCCACGACACAGGCCACATTCGTTCAAGGAGTTTTTCCTTGC GTTCCGGC<br/> ACTATCCTCTTTGCTTTCGGCGGGGCCTCCACGTTTCCCACCATCCAGAA<br/> CGATATGGTTCATCGTGAGAAGTTCTCAAAGTCGGTGATGATTGCTTTCA<br/> TAGCTATCACCGGTCTGTACAGCCCTCTGGTGATCGGAGGCTATTATATTT<br/> ACGGCGATAGTATTCAACCAAATGTAGTCATGTCGCTGAGTCATACAACT<br/> CTCGTTTCCTTAGCGAATATTGCCATGGCAATTCATCTGATCCTAGCGTTT<br/> TTAATTATCATCAATCCTGTTTGCCAGGATCTAGAAGAAATGCTCCAAGTT<br/> CCTCCCGAGTTCTGTCTAAAGCGTTGCATCGTGCGCACGTGCATGATAAT<br/> GCTCATGATAATCGTGGGGGCGACTGTTCCCGGTTTTTCGAAAATCCTCT<br/> CGCTAGTCGGAGGCTCGACCATCACCTTACAACTTTCGTTCTGCCAAAC<br/> TATTTCTACCTGAAGCTCAGCGACCAAAGGGCACCGAACTGGCCAGTTA<br/> GAGAGGTGCCGTTACACATGCGTGTGTACATGTACGAACTGATCGGAATT<br/> GGTCTGGTCGGTGGTTGCTGCTCGACATACAGTGCCTCATTGACATGGT<br/> CGGACCAGACTCCTTCACCAAGCCTTGCTATTGGCCCAACTGA</p> |
| BtAAAP8 | <p>ATGGGTGAAATAAAAAAGCCAGCCAATGAAAAAACCTACATATTAGAGC<br/> AACAGTTTCAGTCTCCTGTTAGTGATGGTCCAATAGTGATACAGAGCAG<br/> CTTTTTTCGGAATGAAAAAGATCCGCACAAGTCTGGATTGGAGGTTGCCA<br/> GTTTCAATTATGTCAACTCCATCATCGGTAGCGGAGTTATCGGCATACCTT<br/> ATGCATTTAAAGAAGCTGGATTGGATTGGGGATCATGATGTTGGCGTTC<br/> GTAGCCTTAGTGACTGATTATTCTCTTGTTGATGGTCCGATCAGCTCAT<br/> ATAAGTGGTGTTTATTCCTATCAAGGACTAATGGAAGCTGCATTTGGGTCT<br/> GCAGGGTTCATCATACTTTCATTTCTTCAATTTATTTATCCATTTATAGCGA<br/> TGGTGAGTTATAACATAGTGGTTGGAGATACAATTACCAAAGTTTTAATG<br/> AGGGTATTCAATTTATACCCTCACTCTTACTTGCCCGGCGGGATGTAGTT<br/> GTAGCTCTTGCAACAATATTTGTGACATTACCCCTCTGTTTGATGAAGAAT<br/> TTAGCAGGCCTGGCAAAGCCTCCATCCTCTCAATGGTTTTTGTCTTTTTT<br/> ATTCTGCTGGCGATTTTTATCCGATTCTTCACTCTCCAAGATGTAGTACCA<br/> CCAAGTTTTGATGCCTGGGAATTTGCGAACTGGGATGTTATTCCTGCTCT<br/> TGGAATCATGGCTTTTGCTTTATGTGCCATCACAACTATTCTTTTGTAT<br/> GAATCCATTGAAAGAGCTGATCAAACAAAGTGGGACAAGATAACGCACT<br/> TTTCGCTCTCTGTTTCTTTTGCTATATCAGCAATGTTTGGTGTGGCAGGCT<br/> ATGCCACTTTCAGTGGATACTCCCAAGGAGATCTGTTGGAAAATTATTGT<br/> TGGGACGACGACCTGATGAACCTTGCTAGACTGTTTTTCAGCTGCACCAT<br/> TTTATTTACTTACCCAATTGAATGCCTTG TGACAAGGTCTGT CATATATCA<br/> AATAATGGGGAATGAAAATAACGTGTCTGATCTCCAACACTTGCTAATCA</p>                                                                                                       |

|          |                                                                                                                                                                                                                                                                                                                                                                                                                                                                                                                                                                                                                                                                                                                                                                                                                                                                                                                                                                                                                                                                                                                                                                                                                                                                                                                                                                                                                                                                                                                                                                                                                                                                                                                                                                                                                                                                                                                                                |
|----------|------------------------------------------------------------------------------------------------------------------------------------------------------------------------------------------------------------------------------------------------------------------------------------------------------------------------------------------------------------------------------------------------------------------------------------------------------------------------------------------------------------------------------------------------------------------------------------------------------------------------------------------------------------------------------------------------------------------------------------------------------------------------------------------------------------------------------------------------------------------------------------------------------------------------------------------------------------------------------------------------------------------------------------------------------------------------------------------------------------------------------------------------------------------------------------------------------------------------------------------------------------------------------------------------------------------------------------------------------------------------------------------------------------------------------------------------------------------------------------------------------------------------------------------------------------------------------------------------------------------------------------------------------------------------------------------------------------------------------------------------------------------------------------------------------------------------------------------------------------------------------------------------------------------------------------------------|
|          | <p>CATGTGGGATTGTTGGGACTACATTTTTACTGTCCATAATGACGGATTGTT<br/> TAGGAGTTGTTTTAGAACTAAACGGTGTGCTTTCAGCCGTACCCTTGCCA<br/> TTATTTTGCCTGCAGCTAGTTACCTGAAATTGGAGCCAGGGTCTGTGTT<br/> CTCCGATAGAAAACCTGCCCGCATTAGGTCTTGGCATAATTTGGATGCCTTGT<br/> AGCTGTAATTGGTGTGTATTGATTATTTTGGATTTTGAAGATAAC<br/> GTGCAGTCATGGAAGAGTCATGCCGTAAGTGTCTCAACCACACTTTGTACA<br/> CTTAA</p>                                                                                                                                                                                                                                                                                                                                                                                                                                                                                                                                                                                                                                                                                                                                                                                                                                                                                                                                                                                                                                                                                                                                                                                                                                                                                                                                                                                                                                                                                                                                                                                    |
| BtAAAP9  | <p>ATGACAGACGGATTTGACGATCACCCATCGAACAGGCCACGGCGAAAGT<br/> CTTTGGACTCTGACAGTGAATCTCAGCCTCTTTTAAAGCTCCGACCACAGC<br/> TGTACCAGTTTATATGATCCAACAACCACTGGCGTGTTTCGGTACGATTCC<br/> GAGAGCGAGTGGGACAACGAAGCAAACAACAAGATGTACAAAGTAAG<br/> AAAGAAACAACAGTTTGGGCGCATTGAGTCCATCAGTTTACAACATA<br/> AAAAGCCCGATGTTCCAGTATTCAACCGAAAAGCATTTCCTACACACCA<br/> GCGCCAGATACGCTGAGTTTTGGCGATCCGAGCCGGTGACAACGTGCT<br/> TCTCGCCTCCTGTGATCAGCCAATCCATGCATAAGGTGGCAACCCAAAGC<br/> AGTATTGTAACAATTTTTTCAATATGGAACACGATGATGGGTACATCCCTG<br/> CTGGCGATGCCATGGGAGTCGGCCGAGCTGGAATACTCATGAGCGTATT<br/> TCTTTTCTTCATGATGGGTATGATTGTCTATACACCGCGCAAAGATGAT<br/> CCAAGTGCAAAAAAAGTACGGCGACAAGCATGTCGGTGAAATGGCCGA<br/> ATTATGTCGTGTCTTGCTAGGTTCGGCCGGTGAGATCATAGCCAAAGTGT<br/> CGTCAATAATCGTCCTTCTTGGAGCTAATATTATTATTACGTCCTGATGTC<br/> CAACTTCTTGTATTATTCAGTGACATTCATTTACCATTTTGGGGATGGAAT<br/> TATAGTCAGTCCGAACCTCTACATTATCTGGAGTGGAGGCATGTCCTAGAA<br/> ATGTGACAGTGCCAGTGGTTCGAATATCAACGGGTGCCTGGTTCGACGTT<br/> CGATCAGTTGTGGCAGCTGAACAACACAGTGCCCTTATTTTTGGCTTTAA<br/> TCCTGGGACCACTCTTAAATTTAAGAGCGTGACGTTCTTCACCAAATTC<br/> AATTCTTTCGGCACTCTTTCGGCCATGTATCTCGTGCTCTTCGTTTTAGTG<br/> AAGTCGATCTTTTGGGACTCCATGTTGACTTCGACCACGAAGATAGCCC<br/> TTATTTTTCTCCACTGGTATCCAGCAACCTCGCGGCCACTTCCGGCATGTT<br/> ACCTCTATCATTCTTCATTCAATTGTGATAACTTTGATGAGGCACAA<br/> CAAGGATCAGACGAAGAATGACCGAGACTTGTCTATCGCATATGGCCTCG<br/> TTGGATTAACCTACTGCCTGGTTGGAGTATTATTTATCTCTGCTTCCGTT<br/> GGCGAAAAGTTGTATTGATGACAATTTGCTGAACAATTTCAAACCCGG<br/> GACTTGATGACAGTAATAGCAAGAGGATTTATTTTCTCCAACTTTTGAC<br/> GGTGTTCCTACTCATAATGTATATGCTTCGGATACAAATATTTGCAGCGAT<br/> GCAGCTGAACCATTACCCTAGTTTATTCATGTTATCCTGCTGAATATCAC<br/> CATCGTTGGAATATGTGTTTCATTTGCCGTTTTCTTCCGAAAATTGGTGC<br/> TCTTTTGGAGTTCACTGGTGCTTGGGTGGCTTCATCTGCGTCTTTACAC<br/> TCCCCTGTTTGTGTACATAGCCTCAGAGATTAAGGAGGATAGGTAACT<br/> TGGCAGACGGTCGTGGTTCATTCGATAATCCCTCTCACTGGGTTCATCAA<br/> TTTTGTGGCGCAGTTCTTCGTAAATGATTAA</p> |
| BtAAAP10 | <p>ATGGATACTCAATTGGCAACGATACAAACCACCCTGGAAATAAAAACCTG<br/> CAGAAAGCAATTCTTGTGCCGATCTTGTGCCGAGAAAAGAGGAACAACA<br/> AGAGAAAAATCCAAATACTCGAGAATTTAAACATGCAACAACAGATTTT</p>                                                                                                                                                                                                                                                                                                                                                                                                                                                                                                                                                                                                                                                                                                                                                                                                                                                                                                                                                                                                                                                                                                                                                                                                                                                                                                                                                                                                                                                                                                                                                                                                                                                                                                                                                                        |

|          |                                                                                                                                                                                                                                                                                                                                                                                                                                                                                                                                                                                                                                                                                                                                                                                                                                                                                                                                                                                                                                                                                                                                                                                                                                                                                                                                                                                                                     |
|----------|---------------------------------------------------------------------------------------------------------------------------------------------------------------------------------------------------------------------------------------------------------------------------------------------------------------------------------------------------------------------------------------------------------------------------------------------------------------------------------------------------------------------------------------------------------------------------------------------------------------------------------------------------------------------------------------------------------------------------------------------------------------------------------------------------------------------------------------------------------------------------------------------------------------------------------------------------------------------------------------------------------------------------------------------------------------------------------------------------------------------------------------------------------------------------------------------------------------------------------------------------------------------------------------------------------------------------------------------------------------------------------------------------------------------|
|          | <p>GAAACGTTCTTGCATATTATAAAGGCTTCTCTGGGGTCCGGGCTGCTAGC<br/> AACACCAGATGCCTTTAAAAATGCAGGAATCGCCTTGGGTCTTATCGGCA<br/> CGGCAATGGCTGTCGCGGCCATCACTCATACCACCGCAATGCTTGTGAGG<br/> AACTCTCAAACATTGTGTTACATGTTAAAAAAGCCATTTCTGACATATTT<br/> GAAACAGCCGAGTATGCATTTGAATATGGAAACCTACCCGCTGCCAAAG<br/> GTCATGGTGGTCTTGCCAGGAGATTTGTAAAGCTGTTTTCTTTAATCACCT<br/> ACTATGGTGTAAACACAATTTATATGGTCTTAATCGCATCAACAATCAAGC<br/> AGCTCGTCGAGACTCGGATAGACTCAATGGAACATTCGATGGTACATT<br/> TTGTTGGCTCTCATCATAATTCTTCCTGTTGGAGTTATCAAACCTCATGAAA<br/> TTCTTGGCCCCTTTCTCAGCCTTCGCTAACGTTTGCCTTTTTGGTGGTCTC<br/> GGGATTATTCTCTGTAGAATCCTGAGGGATTTACCCCTGTCTCCTCTAGG<br/> CCTTTGGTGGCTCCCATTGAGAAAATCCCTTTATTCAATTCGACAATACTT<br/> TTGGTTGTGAGGGCATTGGAATTGTGTTGCCGGCCGAAAATGAGATGA<br/> AAAACCCCGATCATTTCCTGGGGTGGACCGGGGTCTTAAGCTGGTCGAT<br/> GTTCTGCATCGGGATTTCAAACGCCATTGTCGGGTCTTCGGGTACCTTA<br/> AATTCGGTGACGAGGTACAAGGTAGCATCTCCTTAAACATGCAAGACGA<br/> TTGGATCTCAGAATTAGTAAAATACTCATTGCGCTGGCAATCCTCTTCTC<br/> TTATGGGCTTCAAATGACAGTAACCTCCGAGGTTGTGTGGGACAGCGTG<br/> AAGGATCGATTCACAAGGACAACCTCGAAAAAGGCCTACTATTGTGTCA<br/> GAAGCTCTCTAGTTGTTGGAACAGCCGTTGTTGCAGCTGTGATACCCAAC<br/> CTGGCACCAATCATATCGCTGTTTGGAGCAGTTGGTTTTTCAATGATGGG<br/> ACTTTTCTGCCCTGCTGTTATAGATCTAGTGCTTTACTATGATCCAGAAAG<br/> AGGTTGGACCGACTGGCGTTGCTTAAAAAATATTCTCCTCATGTTAGCTG<br/> CTTTAGCTGCGACTTTGCTCGGCACATATTCAAGTATGGTTGACATCATT<br/> CCAACCTACGAATGA</p> |
| BtAAAP11 | <p>ATGAGTGACGGCGGCGTTCGGTGTGCGCGGATTGGGCTTCTGATTCGCCATC<br/> CGCGCGCTCAACGAGTCGGCCCGGCCGGTCTGCCCTTGTCTCCCCGAG<br/> ATCCAGATCGAGAGAGTGTGCGCCCTTCGCCCTTCATCGTGGACCTGTCAC<br/> GCTCGCCACGCACAACATGCGGCTCACGCTCGAGGGAAAAAATGTGCG<br/> GCCAATCATTACAGAATTTGACCCAAAGAAAAGCGGAGTCCGGACGGAA<br/> AGGGCGGATCTCGTCATGGTCAAGTACAAATGCCAGTCAAATGGGGTGC<br/> CTATCACGATGACAACAGGATCGACGCTCCCTCTAGTATCGAGTACGAAC<br/> AAGGATGCCGAATCGGGAGGCTACAACCCCTTCGAGCATCGGAAAGTGC<br/> CCCATCCGACTTCGGACATGGAGACATTCATTACCTGTTGAAAGGTAGT<br/> TTAGGCACTGGCATCCTTGCCATGCCGCTAGCTTTTTCAAATGCTGGACT<br/> ATGGTTCGGTTTTGGCCGCCACGTTTACTATTGGTTTAAATCTGCACATACTG<br/> TGTTACATTCTAGTAAAATCCTCGCATATATTGTGTAGGAGAATGAAAGT<br/> TCCGTCCTTGAGTTTTGCGGATATTGCTGAAGTTGCTTTCCTAGCAGGAC<br/> CTACTTCTGTTCAAGGTTTTGCTGCCTTCTCTAGGTCTATGGTTAATTTGT<br/> TCCTCGTAATTGATTTGCTTGGTTGCTGTTGTGTCTATTTGGTTTTTGTGCG<br/> TAAAAATATCAAGCAGGTTGTTGATGTATACGCAGGGGCAGAGTTTGATG<br/> TACGATGGTACATCCTGTCCATTCTGCCTCTATTGATTGCAATCAACTGA<br/> TCCGGAACCTGAAATATTTAGCCCCGTTTTCCATGATTTCAAACCTGCTG<br/> GTTGGAATTGGGATAACGATTACTTTCTACTACATGTTCAAGGACTTACCT</p>                                                                                                                                                                                                                                                                                                         |

|          |                                                                                                                                                                                                                                                                                                                                                                                                                                                                                                                                                                                                                                                                                                                                                                                                                                                                                                                                                                                                                                                                                                                                                                                                                                                                                                                                                                                                                                                                                                                                                                                                                                                                                                                                      |
|----------|--------------------------------------------------------------------------------------------------------------------------------------------------------------------------------------------------------------------------------------------------------------------------------------------------------------------------------------------------------------------------------------------------------------------------------------------------------------------------------------------------------------------------------------------------------------------------------------------------------------------------------------------------------------------------------------------------------------------------------------------------------------------------------------------------------------------------------------------------------------------------------------------------------------------------------------------------------------------------------------------------------------------------------------------------------------------------------------------------------------------------------------------------------------------------------------------------------------------------------------------------------------------------------------------------------------------------------------------------------------------------------------------------------------------------------------------------------------------------------------------------------------------------------------------------------------------------------------------------------------------------------------------------------------------------------------------------------------------------------------|
|          | <p>TCGTTGGACTCGGTTCCACACCAGCACTTCTCATCCTTTGAGCAGCTTCC<br/> GCTCTTTTTTGGCACAGCTATTTTTGCCTTGGAAGGAATCGGTGTTGTGA<br/> TGCCATTGGAGAATAACATGAAAAAGCCACAGCATTGTGATCGGATGTCCA<br/> GGAGTGTGAAACACAGGCATGTTTTTGGTCATCAGTTTGTATTCTGGAGT<br/> CGGATTCTTTGGATACTTGAAGTATGGCAGTAAAACGGAACCGAGCATCA<br/> CGTTGAACCTGCCTCAACATGAGCTGTTAGGGCAAAGTGTAAACTTAT<br/> GATGGCTGTTGCTATTTTCTTGACGTACGCTCTGCAGTTCTACGTACCATT<br/> CGAAATCATCTGGAAATCAGTAAAACATCGATTACCTCCAAGCCAAAG<br/> ACTGCCGAATACAGCTTGCCTGTAGGACTGGTGGTCGGAACAGTTGTTT<br/> TGGCTATAACTTTCCAGAAGTGGGTCTTTCATCTCTTTGGTGGGTGCAT<br/> TGTGTTTATCGACGCTTGGACTCATGTTCCCTGCAATCATTGAACTGGTAA<br/> TCTACTGGGAAGAACCTGGAATGGGCGCCTACAAGTGGAGGCTATACAA<br/> GAACCTCGCCATTATCGCTTTTGGACTTCTTGGCCTGGTAACAGGGACAT<br/> ACACGAGTCTCTGGGAAATGGGAATGGGTAATGCCATTAA</p>                                                                                                                                                                                                                                                                                                                                                                                                                                                                                                                                                                                                                                                                                                                                                                                                                                                                                                                                  |
| BtAAAP12 | <p>ATGGATGAAGGCTATTCAACATGGACTGGTTTACTGTACGTTTTCAATTTA<br/> ATTGTTGGGACTGGAGTGTGACTCTACCGCATGCATTTGTCCAGGCAGG<br/> ATGGGTCTTTGGAATTCTGCTTCTCTCAGCACTCGCTTTCACAAGTTATAT<br/> GGCTGTAACATTCGTCATAGAGGCAATGTCTCGGGCCAATGCTGTAAAAA<br/> TGACACTAAGATTGCGCCATCTTCAGAAATCCAAAGCAGCCTTTTTGAAG<br/> CAAATACAAGGAGACTCTGACGTAAGTGTGTCTGGGGGATGAAGAAGGT<br/> GATCATTCAAGGATACCTCCTGAAACATCTCCCTTAGTTCCGAATGAATAT<br/> ATTGATAAATTTCCAGCTGCACCAAGATCACTTTTCTCTGTTGATACTAAA<br/> GTTGAAATGGTGGAAATGGCTGAGCTCTTCTTTCCTCCATGGGGCAAGGT<br/> TTTCTTTTTTATAAATTTCTGCCTCTATTTATGTGGAGATTTGACGGTCTAT<br/> GCAGCAGCAGTTGGAAAATCTTTGGTTGATGTCTCATGTATGACCACCTC<br/> AATAAACTCAACTCATCCTGACAATGAATTGTGTTGGGAAGGGGCAACC<br/> ATCACTAGAAGAGGAGCTTATGCTATATTTTTGTTGCTATTTCGTGCTTACT<br/> CTTGACCGTTCGCCTTTTTTAATGTTTCAGAAAACGAAATACATCCAGAT<br/> GTTTACTACCCTCATGAGAACGCTTGCTTTCAGTGTCATGATTGTGCTGTC<br/> GGTGCAAAGAATCATAGACCCACACAGGATCATGGCGCCCCACCTGTC<br/> GTACGACCTGCTGGGATGCCTGCTTTATTCGGCGCATGCATCTACTCCTTT<br/> ATGTGCCACCACTCGTTACCAGCTCTCATCACACCAATCAAAGACAAGA<br/> GCAAGCTAAGCCGCTTCTTTCTTTTGATTTTATTCTCATTCTGACATTTTA<br/> TTTCATCCTCATCCTTACAAGCATTTTTGCTTTCCCAACATTGAGCAACT<br/> TCTTACACTGAATTTAGACCAGATTTAACACTAAGCTAGATCTAGAAAT<br/> AATCGATTATTTCTGATGTTATTCCCTGTTTTAACATTAAAGCGCCAGTTTC<br/> CCTATCATTGCTATCACATTAAGATACTTACAAGCTGCATCGGTTGGA<br/> GAGGATGGCCCCTGGGTGGTGGCAGGTTAGTTCTTCCAACAATCGCTG<br/> TAACCGTACCTATTATTGTCGCGCTTTTATTCACAAATATTGAAACAATTGT<br/> TGGCATTAAATGGATCTTATGCTGGGGCAGGAATACAATATGTTATTCTGT<br/> GTTTCTACTTCTTAGATCTCGTGCTTTAACTCCAGAAGCCCTCAAAAATG<br/> AAGTAAATCCACATCAATCGCCATTCAGTTCACCAATTTGGCCGCGTGCT<br/> CTTCTTTTGTGGGCAGTTTGTGTGTGTCATTTTTGTCTCGGTGAACCTAGCT<br/> GATAAGTTTCTGAACGTATCAGTTTTTTAA</p> |

|          |                                                                                                                                                                                                                                                                                                                                                                                                                                                                                                                                                                                                                                                                                                                                                                                                                                                                                                                                                                                                                                                                                                                                                                                                                                                                                                                                                                                                                                                                                                                                                                                                                                     |
|----------|-------------------------------------------------------------------------------------------------------------------------------------------------------------------------------------------------------------------------------------------------------------------------------------------------------------------------------------------------------------------------------------------------------------------------------------------------------------------------------------------------------------------------------------------------------------------------------------------------------------------------------------------------------------------------------------------------------------------------------------------------------------------------------------------------------------------------------------------------------------------------------------------------------------------------------------------------------------------------------------------------------------------------------------------------------------------------------------------------------------------------------------------------------------------------------------------------------------------------------------------------------------------------------------------------------------------------------------------------------------------------------------------------------------------------------------------------------------------------------------------------------------------------------------------------------------------------------------------------------------------------------------|
| BtAAAP13 | <p>ATGGCGACTGATCAGAAGACCAATCCACCCCAATTTGGATCTGATGAAG<br/> AGATCGGATATGTCGGTGATTCCATGAAGGCCCGATTATTAAGATGAC<br/> TATGACCCGGACAAAGACACAGGCGATAAAAATTTGACAACGTATTTTCG<br/> AGACATTGATTCACATGCTGAAAGTTAGTTTAGGTAAGTGAATTTTAGCG<br/> ATGCCCAAGGCGTTTTCCAATGCGGGTTATTTGCTGGGCATTATAGGCAC<br/> TCTTGCTGTTGGAGCCCTCAGTACTTATACAATGCAAATGCTTGTGCGGT<br/> CAGAATATGAGCTGTGTA AAAAGCGACGAGTTCCCAGAATGACGTATGC<br/> TCAAACATTGAGGCAGCATTGCGAGAAGGACCCAAGACATTTAGACCT<br/> TTAGCAGGAGCTGCGGGGGTGGTGTGCAAATAATTCTCTTTTTGTTTCA<br/> AGGCGGTGCTTGTGCGTGTACATTGTATTTCGTGGCTGAAAATCTGAAAG<br/> CGGTGGGAGATCAATACTTTGGCAAACGGATATCCGGCTCTACATGGCA<br/> TACTTGTGGGACCTTTGATCCTGATCTGTTGGTTGCGTAACTTTAAATAT<br/> TTGGCACCCGTTTCGTCCTTCGGTAACGTAATGACGTTGATCTGCTACTG<br/> CATTACGTTTTACTATATGCTCTCCGATTTGCCGAGTTTCTCCACCAGACA<br/> AGCGGTTGTTGAGTTGGATCGGTTTCTCTTTTTGAATTGGATCGTTTTCC<br/> TCTTTTATCGGAACGGCTCTTTTCGCGATGGAAGCGGTTGGGGTGGTGA<br/> TGCCTCTGAAGAGTGAGATGAAAAATCCACGCCAGTTTCGGGGCTGGTT<br/> TGGTGTGCTCAACTGTGCTATGGTGCCAATTACGATCCTCTACCTTCTGGT<br/> CGGTCTTGCCGGATATCTGAAGTATGGAGACTCAGCCAGGGGCAGCATCT<br/> CACTCAATTTGCCGGATAATGAAGTTCCCGCGCAATGCGTCAAAGTGATG<br/> TTGGCCTTCTCTGTCTACATTTGTTATGCAATCTGCGCCTATGTAACGTT<br/> CAAATGCTGTGGGGTGATTATCTGGAACCAAATTTGAAGAATCGAAGA<br/> AAAAATTAGTCTACGAATATATTGGAAGGACATTACTCGTTTTGGTGACAT<br/> TCGGACTGGCAGTTTCGATCCCGAACTTGGAGTTATTTATATCGTAATCG<br/> GTGCCCTAGGATTAGCGAATTTGGGCGTCGCTTTTCCA ACTATAATGGAG<br/> TTGCTCACACGTTGGGACAAATATCACGGCTGCCTTTTCGCTCTCTTCTT<br/> GCTCAAAAATATCTGTCTGTTATTCGTAGCCGTTTACGCATTTTTCATTGG<br/> AGGATCCACCAGTATTATCAACATCTACAAGAAAGTAATCGTAGGCTCGT<br/> GA</p> |
| BtAAAP14 | <p>ATGGCAAGCGATCAGAAAAATGGAAGCACACCCGCACAGCAAGAAAGA<br/> GGTGACGTCATCAAACCCCAGGAGACACGGATTATGATCCAGATGAAG<br/> ACCTAGGAGAGAAAAATCTGACA ACTTACTTCGAGACATTACTTCATATG<br/> CTGAAAGTCAGCCTGGGCACTGGAGTTTTGGCGATGCCGAAAGCTTTTG<br/> CCAATGCTGGCTATCTTTTGGGTATGATTGGCACAATCATAGTCGGAGTTC<br/> TTTGTACTTACACAACGCAGATGCTTGTCCAATCAGAATACGAGCTGAGT<br/> AGAAGACTGCGAGTGCCCAGTATGACGTATCCTCAA ACTTTTGAAGCAG<br/> CGTTCTCAGAGGGACCGAAGCGATGCAGACCATTGCTAAAGCCGCGGG<br/> CGTTACGTGCAATCTGATTCTATTCCTTCTTCAATGCGGTCTCAGTTGTGT<br/> TTACATGGTATTCGTAGCTGACAATCTAAAGGCGGTATTGGACCAGTACAT<br/> CGGGACAACAGACATCAGACTATA CATGGCGTGTCTCTTGGGCCCACTG<br/> ATCATTCTCTGCTGGTTCGGTAACCTGAAATACTTGGCACCAGTGTCTTTC<br/> TTTGGTAATTCCATGACCATGATCTGCTACTGCATTACCTTCTGGTACGTT<br/> CTCACTGACCTGCCAAGCTTTTCCACCAGGAAAGCTGTTGTGCGATCTCA<br/> AACAGTTCCCACTCTTCATCGGCACGGCGCTGTTGCAATGGAGGCTATC</p>                                                                                                                                                                                                                                                                                                                                                                                                                                                                                                                                                                                                                                                                                                                                                             |

|          |                                                                                                                                                                                                                                                                                                                                                                                                                                                                                                                                                                                                                                                                                                                                                                                                                                                                                                                                                                                                                                                                                                                                                                                                                                                                                                                                                                                                                                                                                                                                                                                                               |
|----------|---------------------------------------------------------------------------------------------------------------------------------------------------------------------------------------------------------------------------------------------------------------------------------------------------------------------------------------------------------------------------------------------------------------------------------------------------------------------------------------------------------------------------------------------------------------------------------------------------------------------------------------------------------------------------------------------------------------------------------------------------------------------------------------------------------------------------------------------------------------------------------------------------------------------------------------------------------------------------------------------------------------------------------------------------------------------------------------------------------------------------------------------------------------------------------------------------------------------------------------------------------------------------------------------------------------------------------------------------------------------------------------------------------------------------------------------------------------------------------------------------------------------------------------------------------------------------------------------------------------|
|          | <p>AGCGTGGTTATACCTCTGAAGAACGAAATGAAAAGACCAGCACAGTTTC<br/> GCGGGTCGTTTCGGCGTGCTCAACTGCTCAATGGTGCCCATCACAATCTTG<br/> TATCTCCTTGTTGGACTTGGCGGGTATTTGAAATACGGGGATGCAGCAAG<br/> AGGAAGTATCTCTCAATTTACCAACAAGTGAAGTGCCAGCTCAATGTG<br/> TAAAATTGATGTTAGCTTTCTCAGTCTTGATTAGCAACACCGTACTAACGT<br/> ACGTAACGTCAACTATCCTTTGGGAAGAATTTCTAAAGTCAAGGTTTCGAA<br/> AATTTCGAAGAGAAAAGTTGTATGGGAGCTCTCTGCCAGAGCTTTCTTAGT<br/> TTAGCAACATTTGTTATAGCTGCTTCAATCCCTAACCTGGAGTTGTTTCAT<br/> ATCATTAATTGGAGCTCTGGGATTGGCAAACCTTGGCCTCGCTTTTCCAG<br/> TAATAGCGGAGACCCTCACATTCTGGGACAGATACCATGGTTGCTGGTTT<br/> TTCTTCTTCATTCTCAAAAATATCTGCTTGCTGCTCGCGGCGATCTACGCA<br/> TTCTTCATCGGCGGAGCAACCAGCATCATCACCATCTACGAAAAATTAAT<br/> GGATGGAACCTTATTTTAG</p>                                                                                                                                                                                                                                                                                                                                                                                                                                                                                                                                                                                                                                                                                                                                                                                                                                                                                 |
| BtAAAP15 | <p>ATGACGAAAACGGAGAGCAAGGATATGATGTCGAAGATCAGCGAGGCG<br/> GAGAGGAACGGCTCGAAAACCAAATCATCGATGACAAATATGATTACG<br/> ACCCGTACGACCAGCCTGCGCCAGAAAATGCCACCTCATACGCAGATTC<br/> CCTCACGATCTTGCTCAAGTTCAGTTTGGGAACGGGGATTTTGGCAATGC<br/> CTCGATCATTTCACAACGCTGGTTACGTGGTTCGGTTTTATTGGAACCATG<br/> GTTATCGGATTTCTGACAACATACACGATTCACATGATCATGTCTGCCGAA<br/> TACGAGTTATGCAAAGGAAACGTGTCCCTAATATGTCTATCCTGAGAC<br/> CATGGAAGCAGCTTTTGAGTACGGACCACGAAAAATGCGAAAATTCAAA<br/> AATGCTGCGTGGTTTATGTGTTATATTTTCTACTCATCTATCAGACTGGTA<br/> CAAGTTGTATTTACTTGGTCTTCATTGCAGACAACCTTGAAAGAGGAATTA<br/> GATCTCTTTTTTGGTGGCTCCACGGACATCAGGATGGTGATTGTTTATCTT<br/> CTAATTCCTCTTATACTAATTTCAATGGTTCGAAATTTGAAACTCATATCAC<br/> CCCTTGCCTCGCTGGGACACATTTTCGTGATGATCTGCTTTAGTATCATCT<br/> TCTACTACATTTTCAGAGATATACCCAACATTGCTGAACGCAAACCAGTT<br/> GGAACCATGCAAGGCATTCTCTGTTCTTTGGCACTGTGCTTTTTGCAAT<br/> GGAAGCAATCGGAAGTGTGATGCCCGTCAAAAATGAGATGGCGAAACCT<br/> GAACAATTCACCAGCAGATTTGGAGTCATTAACATGGCCATGGTTCCAAT<br/> TGTTCTCTTGACACGATTATTGGTTTGTTCGGCTATTTGCAATACGGAGA<br/> CAAAACCAAAGGCAGTATCACATTGAATATGCCCCAACACAATCTGTTTG<br/> GACATACAGTGAAATTGCTCCTGGCAGCGTCTGTTTACATCAATTACGCT<br/> ATTTCAAACACTACGTCATTTACGACTTGGTGTGGCCCTGCCTGACCAGTAA<br/> GATGGAGAAGAAGTTCGCACAAGTTATCCTACGAGTATTGCGTGAGGATA<br/> GCTATCGTGCTAATTACATTTGGGTTCTCGATAGCCATTCCTAACTTGGAA<br/> CTGTTCAATTCGTTCCCTAGGATCTCTATGTTTAGTTAATTTAGGTATATTTTT<br/> CCCGTCAATTTACAAACCCTGACATTCTGGGACGAATTCAGGGGTCTTA<br/> GGTTTTACACGTTCCCTTATAAAAAATATTTTCTTGATTATAATTGCTATTTTA<br/> GGATTTGTTATCGGGGTTGGCAGGAGCTCCATTGAAATTTACAACACCGT<br/> AATTTTACCATCTTTCTCATAG</p> |
| BtAAAP16 | <p>ATGGGTTTTAAAGAAAAATCAGACTCACAAGCAGTTCTCGATGTGGAAG<br/> TGAGCGGAGATAGCCCTGATTTGGATGAACATTATGAGCCACACGATTAC<br/> CAGCCACCTGGTAAATCAGCCTCGTACTGCGAGGCGCTTTTCATTTGGT</p>                                                                                                                                                                                                                                                                                                                                                                                                                                                                                                                                                                                                                                                                                                                                                                                                                                                                                                                                                                                                                                                                                                                                                                                                                                                                                                                                                                                                                                       |



|          |                                                                                                                                                                                                                                                                                                                                                                                                                                                                                                                                                                                                                                                                                                                                                                                                                                                                                                                                                                                                                                                                                                                                                                                                                                                                                                                                                                                                  |
|----------|--------------------------------------------------------------------------------------------------------------------------------------------------------------------------------------------------------------------------------------------------------------------------------------------------------------------------------------------------------------------------------------------------------------------------------------------------------------------------------------------------------------------------------------------------------------------------------------------------------------------------------------------------------------------------------------------------------------------------------------------------------------------------------------------------------------------------------------------------------------------------------------------------------------------------------------------------------------------------------------------------------------------------------------------------------------------------------------------------------------------------------------------------------------------------------------------------------------------------------------------------------------------------------------------------------------------------------------------------------------------------------------------------|
|          | <p>AAAAGCCAGTTTGGGGACCGGAATTCTATGTATGCCGAGAGCTTTCTATA<br/> ATGCAGGCTATGTTCTAGGTGCGGTCGGCACGATCTTTGCAGGCGTGATA<br/> TCTGTGCTCAGCGTTCATCTAATTGCAAACACAGAGCATGAGCTTTGCAG<br/> GAGAAAGAGAATCCCTCGCATGACGTATCCGGAGACACTCGAAGCATCA<br/> TTTGAGATGGGCCCTGGGAATGTTAAACGATACAAAGGTATTGCAAGGG<br/> TGGTATGCACTGTAGCTTTAACTATGCAGGCATTTGGTAGTGA CTGTGTGT<br/> ATGCAATCTTTATAGCTGTAAATATCAAAGAGATTTGTGACCATTTTTTCA<br/> CCCCGCCCGCTGAAATTTTATCTGCTATGCCTGCTCGGACCCTTCATAG<br/> TAATTTGTTGGATACGGAATCTAAAATACTTGGCACCAGGATCCACAATA<br/> GGCACCGCCTGTAGCATATGCTGTATTGGTGCTGCCTACTATTATATATTTT<br/> CGCAGCCCATCACGACTGAAGGACGGAAAACCGTAGGATCCCTCAGGG<br/> ATTTTGCTCTCTTTTTCGGTGCTGCATTGTTTGCGCAAGGAGATTTTGGAG<br/> TTGTTGTACCTTTAAAAAACAGGATGACAAAACCGGCACAGTTTGGATC<br/> AGTTTGTGGTGTCTGTAACGTGGCGATGATTCCAGATGTTTTCCTCTACG<br/> TGATCATTGGTGTTTTCGGATATTTAGCATACGGTGATAACACGCGCGATC<br/> CAATCACACTAAACATGCCACAACTGGATTTGCTGGCGATTTAATCCGA<br/> TTCCTGTTGGCCGTCTCCGTTTTTTCGATGTATCCATTTGTAATTACGTT<br/> GTCATCGAGTTGCTCTGGGACAAAACTTGAAGCTAAAACTTCAAGATG<br/> TCAAGCATCGAAGCAAGTGGGAGTACGCTTTTCGAACAGCAGTGA CTTG<br/> CGCAAATATTCTATTCTGCATCGCCGTTCCAGTTTGGAAATTGGTTATGTC<br/> ACTAGTGGGATCATTGATGGTGCTGCCCTTTCATTATGGTTCCCCGCCAT<br/> CATGTACACGCTCACGTTTTGGGATGAGTACAGGGGCATTAAATTTGCAT<br/> TCTTCCACTCAGGTCCTCCATCCTTCTACTCACCGGAGTTTTCGCACTTG<br/> TAGTTTCCGTTAGCATCACGTTTTTTGAAATTTATGAAACCATGCTCTAG</p> |
| BtAAAP17 | <p>ATGGGTCTTGAGAAAAAATCAGAATCACGAACAGTTCTCGACGTAGGGG<br/> TAAACGAGGATATTCCTGATTTTTTCGGATGAAA ACTATGAGCCACATGAT<br/> CATGAACCGGATGGCAAATCAGCCTCATACTTTCAGGCATTCAGCGTCTT<br/> GATGAAAGCTAGTTTAGGAACCGGTATACTAGGAATGCCGAGAGCTTTTT<br/> ACAAAGCAGGATACATTCTCGGTACAATAAGTACGATAATCTCTGGAGGA<br/> TTAACAATACTCAGCGTTCATTTAATCGCAAGAACAGAACATGAACTGTG<br/> CAGGCGGAAAAGAATACCGCGCATGACTTATCCTGAAGTAGCCGAAGCT<br/> GCATTTGAAAAGGGCGTTTTTCAGACGTTTTTAAGAGAGTTTCAAGAAATAT<br/> ATGTTTTTACGGCTTGGTTTTAACGGAATTTGGA ACTACCGCTGCGTATGC<br/> GATTGCCATTGCTGAAAATTTAAAAGCGGTCTGTGATAATAACTTTCCCC<br/> GGCTCCTCTGAGATTTTACCTTCTTTCCTCTTGGGACCCTTAGTTGTATT<br/> ATGCTGGATAAAAAATCTGAAGTCGCTAGCACCTGTGACATCGTTAGGGA<br/> CGTGTGTCAGTATTGGTTGCATCGGCACTATCTATTACTTCATCTTCTCGC<br/> AGCCAATCTCGCTCGAACACAGAAAGGCGTCCGGGTCATTCAATGACTT<br/> TGCCCTCTCCTTCGGCACTACATTGTTTCGCACTGGAAGCTTTCCAGAGA<br/> TTCTGCCGATCAAAAATAGGATGACGAAACCGGGGAGAATTTGGATCCAC<br/> TTTCGGTGTGCTAAACGCAGCAATGGTTCCCAACTGCATTGTGCGTGC<br/> TTTTCGGGTTTTTCGGGTATCTAGCCTACGGAAAAAATACTCTCAGTCCC<br/> ATCACTCTGAACTTGCCACAGACCGGAATGGTTGGAGACTTAATCAGGT<br/> TCCTCTTGGGTGCATCCATCTTCATGTCTTATCCAATCGGCAATTACGTTG</p>                                                                                                                                                                                                                              |

|          |                                                                                                                                                                                                                                                                                                                                                                                                                                                                                                                                                                                                                                                                                                                                                                                                                                                                                                                                                                                                                                                                                                                                                                                                                                                                                                                                                                                                                                                                                                                                                                                                                                           |
|----------|-------------------------------------------------------------------------------------------------------------------------------------------------------------------------------------------------------------------------------------------------------------------------------------------------------------------------------------------------------------------------------------------------------------------------------------------------------------------------------------------------------------------------------------------------------------------------------------------------------------------------------------------------------------------------------------------------------------------------------------------------------------------------------------------------------------------------------------------------------------------------------------------------------------------------------------------------------------------------------------------------------------------------------------------------------------------------------------------------------------------------------------------------------------------------------------------------------------------------------------------------------------------------------------------------------------------------------------------------------------------------------------------------------------------------------------------------------------------------------------------------------------------------------------------------------------------------------------------------------------------------------------------|
|          | <p>TTGTTGAGCTTCTTTGGCACAAGAATTTGAAACTGAGATACGAAAAATA<br/> CCAGATTATTGGGAGTACGTATTCCGAACATGCGTGACGTGCTCTAACAT<br/> CTTATGCTGCATTGCTGTGCCAACTTGGAGCTAATCATGTCGTTGGTGG<br/> GATCTCTCATGGTGCCTGCTCTCGAGCTTTGGCTCCCTGCCATCATGCAC<br/> ACTATCACGTTCTGGAATGAGTACACAGGGATTAAATTCCTCATCTACGT<br/> GATAGGACCTTTCATTTCTAGTTATACTATTTGATAATGTTGAATGTTTGT<br/> CTTGTAACGATATTGTTAATTTTGTA</p>                                                                                                                                                                                                                                                                                                                                                                                                                                                                                                                                                                                                                                                                                                                                                                                                                                                                                                                                                                                                                                                                                                                                                                                                                                                          |
| BtAAAP18 | <p>ATGTTATATTTTGCAGACCCAGCAATTGCGAAAATGGAGCTGGGTTGCAA<br/> TCGTGGCAAGATGGGCTTCAATAAAACAACGGACTCGCAGGCAGCCTTG<br/> GATGTAGATTTGAATGAGAAAAATCCAGAAATTGGTGAGAATTACGAGC<br/> CGTACAATCATGAACCAGCCGGTAAAACTGCCTCGTACATCGAGGCTCTG<br/> CTCATTTTGATAAAAGCCAGTGTTGGGACTGGCGTCTTGGGCATGCCAAG<br/> AGCTTTTTACAACGCGGGATACGTTCTTGGAAACCATGGGCACCGTTTTTG<br/> CTGGAATTTTAACCACCGTCACAGTTCATTTGATCTCAAACAGTGAACAT<br/> GAACTATGTAGACGGAAACGAATCCACAAATGAGTTACCCAGAAACTG<br/> TAGAGGCCGCATTTGAACATGGCCCTGGGAATCTAAACGGTTTAAAA<br/> CACGGCAAGGATAATATGTCAATTGGCTTTAGTGATGCTGGAGTTTGGCG<br/> CAGACTGCGCTTATGCGATATTCATAGCTGATAATATCAAAGAGATTGTG<br/> ACCACATCTTCTACCAGCTCCTGTGCGATTTTACCTGTTGTGCTTACTCG<br/> GGCCTTTGATCTTCATGTGTTGGATCAGGAATTTGAAGTTCCTGGCGCCA<br/> GGGTCAACTTTAGGGACTGGCTGCGCAATAGGGTGCCTGGGAGTTGTAT<br/> TTTATTTCATTTTCTCGCAGCCATCACGCTCGAGGGGAGAAAAGCGGCC<br/> GGATCACTAAAGGACTTTGCGCTTTTCTTTGGGCAAGTCTCTTCGCATT<br/> TGGAGCTTACGGAATGGTTGTTTCGTTAAAGAATAGAATGAGGAGGCC<br/> GCCAGTTTCGGATCTCCCTTCGGTGTGTAAATGTAGCGATGGTCCCAA<br/> TCTGGTCCTCTACGTTATCATGGGCTTCTTCGGTTATCTGGCATAACGGAAA<br/> CCAAACTAAAAGCTCCGTCACATTGAATCTACCGCAGACTGGATTCATCG<br/> GAGATTTGATTCGGATACTGATGGCAGGATCCATTTTACGACCTACCCAC<br/> TGTGTAATTACATTGTTGTTGAGCAACTTTGGCACAAAATTTGGCATTG<br/> AGATTTGAGGACAACAAACGTGTGATTTTCTGGGAGTATGTGTTTCGCAC<br/> GGCTTTAACTTGTGCAAATATCGCCTGCTGTATTGCAATACCAAATTTGGA<br/> GTTAGTCATGGCATTACGGGATCACTGATGGTTCCTACCCTTGGTATATG<br/> GTTTCCCAGCATCATATACACCCTCACATTCTGGAACAAATACACAGGGA<br/> TTAAATTTGCTTTCTTCCTTTCAAGAACCATTATCATAATGATCGTAGGTGT<br/> ATTTGCGTCCGTAATATCTCTCAGCACAACCGTCCGAGAAATTTATGGAA<br/> CTGCTTTCTAG</p> |
| BtAAAP19 | <p>ATGGAGCTGGGTTGCAATCGTGGCAAGATGGGCTTCAATAAAACAACGG<br/> ACTCGCAGGCAGCCTTGGATGTAGATTTGAATGAGAAAAATCCAGAAAT<br/> TGGTGAGAATTACGAGCCGTACAATCATGAACCAGCCGGTAAAACTGCC<br/> TCGTACATCGAGGCTCTGCTCATTTTGATAAAAGCCAGTGTTGGGACTGG<br/> CGTCTTGGGCATGCCAAGAGCTTTTTACAACGCGGGATATATTCTTGGAA<br/> CCATGGGCACCGTTTTTGCTGGAATTTAACCACCGTCACCGTTCATTTG<br/> ATCTCAAACAGTGAACATGAACTATGTAGACGGAAACGAATCCACAAA<br/> TGACCTATCCGGAACCGTGGAAGCCGCATTTGAATATGGCCCTGGAAAT</p>                                                                                                                                                                                                                                                                                                                                                                                                                                                                                                                                                                                                                                                                                                                                                                                                                                                                                                                                                                                                                                                                                                                                                                                |

|          |                                                                                                                                                                                                                                                                                                                                                                                                                                                                                                                                                                                                                                                                                                                                                                                                                                                                                                                                                                                                                                                                                                                                                                                                                                                                                                                                                                                 |
|----------|---------------------------------------------------------------------------------------------------------------------------------------------------------------------------------------------------------------------------------------------------------------------------------------------------------------------------------------------------------------------------------------------------------------------------------------------------------------------------------------------------------------------------------------------------------------------------------------------------------------------------------------------------------------------------------------------------------------------------------------------------------------------------------------------------------------------------------------------------------------------------------------------------------------------------------------------------------------------------------------------------------------------------------------------------------------------------------------------------------------------------------------------------------------------------------------------------------------------------------------------------------------------------------------------------------------------------------------------------------------------------------|
|          | <p>TCTAGACGATTTAAAAATACTGCAAGGATAATATGTTATTCAGCTTTAGTG<br/> CTGCTAGAGTTTGGCGCAGACTGCGCTTATGCGATATTCATAGCTGATAAT<br/> ATCAAAGAGATATGTGACCACATCTTCTCTCCAGCTCCTGTGCGATTTTAC<br/> CTGTTGTGCTTACTCGGGCCTTTGATCTTGATGTGTTGGATCAGAAATTTG<br/> AAGTTCCTGGCGCCAGGGTCGACTTTAGGAACTGGCTGCGCAATAGGGT<br/> GCGTGGGGGTTGTATTTTATTTCAATTTCTCGCAGCCATCACGCTCGAGG<br/> GGAGAAAAGCGGCCGGATCACTAAAGGACTTTGCGCTTTTCTTTGGGCA<br/> AGTTCTCTTCGCATTTGGAGCTTTTCGGAATGGTCGTACCGTTAAAGAACA<br/> GAATGAGGAGACCCGCCAGTTTCGGATCCCCCTTCGGTGTTGTAATGTA<br/> GCGATGGTCCCAAATCTAGTCCTCTATGTTATCATGGGCTTCTTCGGTTAT<br/> CTGGCATAACGAAACCAAACTAAAGCTCCGTCACATTGAATCTACCGC<br/> AGACTGGATTCATCGGAGATTTGATTCGGATACTGATGGCAGGATCCATT<br/> TTTACGACCTACCCACTGTGTAATTACATTGTTGTTGAGCAACTTTGGCAC<br/> AAAAATTTGGCATTGAGATTTGAGGACAACAAACGTGTGATTTTCTGGG<br/> AGTATGTGTTTCGTACGGCTTTAACTTGTGCAAATATCGCCTGTTGTATTG<br/> CAATACCAAATTTAGAGTTAGTCATGGCATTACGGGATCACTGATGGTT<br/> CCTACCCTTGGTATATGGTTTCCCTAGTATCATATACACCCTCACATTCTGGA<br/> ACAAATACACAGGGATTAAATTCGCTTTCTTCCTCTCAAGAACTATCATC<br/> ATAATGCTCGTGGGTGTATTTGCGTCCGTAATATCTCTCAGCACAAACCGTC<br/> CGAGAAATTTATGGAAGTCTTTCTAG</p>                                                                                                                                                                                                                                 |
| BtAAAP20 | <p>ATGCGTTTCAATAAAAATTCAGATTCGCAAGCAGCCATCGATGTGGAGGG<br/> AAGCGATAGTGTACCAACAATAGTGATGACTACGAGCCGCATGACCAA<br/> CTACCTCCTGCGAAATCAGCCTCGTATATCGAGTCTCTATTCTGATA<br/> AAAGCGACTTTAGGAACTGGAATCCTGGGCATGCCAGAGCCTTTTACA<br/> CCGCAGGGTATGTACTTGGAGCTGTGGAACACTTTTCGCTGGAATATTA<br/> ACAACAGGGAGCATGATCTTAATCGGCAAATCAGAGCATGAGCTTTGCA<br/> GGCGGAAAAGAATCCCCGTATGACGTATCCAGAAACAATGGAGGGCGGC<br/> ATTTGAGTTAGGCCCGGGATGTTTGAGGCGATTTAAAGGCGCTGCAAGG<br/> TTCCTAACGACAACCTGCAATAGTCATGTTGGAATTTGGCACGGACTGTGC<br/> GTATGCGATTTTCATCGCTGTAAATATTAAGAGATCTGTGAGCAACACTT<br/> CTCCCCGCGCCGCTAAGATTTTACCTCTTGCTTACTGGGACCACTAAT<br/> CGTGATGTGTTGGGTCCGCAATTTGAAGTATCTGGCCCCAGGGTCGACTT<br/> TAGGTAGTTTTTTCGCTGTGCGGTGCGTCGCTGCCGTTTATTACTACATAT<br/> TTTCCCAACCAATGACGCTGGAGGGGAAAAAAGCGGTCCGGTCTGTAA<br/> GAGACTTCTCTCTTCTTCGGTCAAGTCCTCTTCGCTCTAGGAGCGTTT<br/> GGTGTGGTTCGTGCCTTTGAAAAATAAGATGACAAGACCGGCACAATACG<br/> GATCGGTCTGCGGTGTAGTTAACGCAGCAACGATCCCAGATATATTTCTCT<br/> ACATCATCATCGGCGTTTTTGGGTATTTGGCTTACGGAGAAAACACACAA<br/> AACCAATCACTTTGAATATGCCGCAAACCTGGAATCGTTGGCGATTTGAT<br/> TCGGATTCTGTTAGCGTGCTCAATTTTACGACCTACCCTCTTTGCAATTA<br/> CGTTGTGATCGAACAACCTCTGGCACAAAACTTGAGGCTATGGCTTGGT<br/> GATGTCAAAAATCCACACCAATGGGAGTACGCATTCCGGACAGTTGTAA<br/> CGTGGCAAACGTCCTTTTTTGTATCGTGGTGCCAAGCTTGGAGTTGGTG<br/> ATGTCCCTCGTGGGATCCCTGATGGTGCCGGCACTTGGTCTCTGGTCCC</p> |

|          |                                                                                                                                                                                                                                                                                                                                                                                                                                                                                                                                                                                                                                                                                                                                                                                                                                                                                                                                                                                                                                                                                                                                                                                                                                                                                                                                                                                                                                                                                                                                                                                                                                                                          |
|----------|--------------------------------------------------------------------------------------------------------------------------------------------------------------------------------------------------------------------------------------------------------------------------------------------------------------------------------------------------------------------------------------------------------------------------------------------------------------------------------------------------------------------------------------------------------------------------------------------------------------------------------------------------------------------------------------------------------------------------------------------------------------------------------------------------------------------------------------------------------------------------------------------------------------------------------------------------------------------------------------------------------------------------------------------------------------------------------------------------------------------------------------------------------------------------------------------------------------------------------------------------------------------------------------------------------------------------------------------------------------------------------------------------------------------------------------------------------------------------------------------------------------------------------------------------------------------------------------------------------------------------------------------------------------------------|
|          | GGCCATCATGTACACACTCACGTTTTGGAACGAGTACAGAGGTGTGAAA<br>TTCGCTCTCTTCTTACTCACATCCATCGTTCTCGCTTTGACCGGTATGTT<br>GCCCTTGTTGTATCTCTGAGCACCCTCTCACTGAGATCTACGAACTGT<br>TCTCTAG                                                                                                                                                                                                                                                                                                                                                                                                                                                                                                                                                                                                                                                                                                                                                                                                                                                                                                                                                                                                                                                                                                                                                                                                                                                                                                                                                                                                                                                                                                   |
| BtAAAP21 | ATGACACGTGACAATCATGTCCGCCTACACTTAGAAAATAGGCAATCGGT<br>TAAACATGGGATTGACAACCCAGCAATGCTTGAAAACGGATCTACAGAG<br>CAAGTTTGTACACCGGAAAAGAACGAGAAGAAGGTTTCAGAATCAAAG<br>GAAGTTCTGACAAGGATAACCGTAGTAAAATCTCCAAGCAGTCTCGAAA<br>AACCTCCTCTTGATGATGACTACGACCCCTATCTACACAGAGATGTTAAA<br>CACCCAACATCATACTCCGACACATTCTTCCATATGCTGAAAGCAAGTTT<br>AGGAACAGGAATCTTAGCCATGCCAACGCTTCCACAATGCTGGATTCA<br>CCGTTGGGACGATAGGAACGCTTGTGATTGGATTCTTGTGTACATACGCC<br>ATCACTCTCTGATCGGTGCAGGATACGAACTTTGCAGGGCGGCGAAAAG<br>TCCCCAGTATGACGTACCCTCAAACGTCGGAGGCCGCCTTTGAGGAGGG<br>CCCACAATGGCTTCGGTGGTTTACGCCTTATGCTGCGTTCCTACCCAATT<br>GTTCCCTCATATTGTACCAAATCGGAGCCAGCTGTATCTACGTCGTTTTCAT<br>GGCTAGTAACATCAAAGCGGTTTTCGACGAATACTACGCGGAAACAGAC<br>GTGCGACTCTACATGGTTTACATCCTGATCCCTCTCATTCTGATCTGTTGG<br>ATTCGAAACCTGAAGCTCCTAGCACCGTTTTCTTCGGCTGCCAACTTCGT<br>GACCATCGTCAGTTTTGGAATCACCTTTTACTACATTTTCTCGGATATCCC<br>GCACATTTACAACGACAGGCTGTTCGGGAAAGTGGAGAATATGCCGCTG<br>TTTTTTGGAAGTGTGTTGTTTCGCCATGGAAGCCATTGGAGTGATTCTTCC<br>TCTTGAGAACGAGATGGGCAATCCGAAAAGGTTTGCAAGTCCTTTCGGC<br>GTCCTGAATACTTCTATGATACCCATTACTCTTCTGTACACTTTTGTGGGT<br>TTTTTCGGCTACATGAAATTTGGAGAGAAAGCGGAAGGAAGCATAACTTT<br>GAATCTTCCGAAAGATGAAGTGCTAGCTCAAAGTGTGAAGCTTATGTTG<br>GCTGCTTCTATCTACATGTGCTACGCGTTATCTTGCTACGTAGCTTTTGATC<br>TCATGTGGAATGGATGGATTGCGGCTAAATTGGAGAAAATGAACATAAA<br>ACATTCTGGGAATACGTTACCAGAACCTCAATTGTCTTAGTCACATTCAC<br>CCTGGCCGTGGCCATCCCCAACTTGGAACTGTTTCATCTCCCTGATCGGCG<br>CCCTGTGCCTGGCCACGATGGGCATCGCCTTCCCGGCGATCATCCAGATG<br>CTCACCTTCTGGGACTACTACCGCGGCTTCAGCTTCGTCCTCTTCTCAC<br>GAAGAACATGATCCTTATCCTCATCGCCCTCCTCGGCTTCTTCATCGGCAC<br>CAGCACCAGTCTGAACAAGATCTACCACGAGTTCTTTCTCAGCTGA |
| BtAAAP22 | ATGAGCAATGAAGAAGTGCCTCTGTTGAGCGGTGTCGGAGGTGGTGTGCG<br>GAAAATCGAAATGTTCCCTCAAAGGCCTGTCCCTGTTTTTCGCCTCCCTG<br>TGCGTGATCGACCTCTTCGGGGTCTTCCCGATCGTAGCCCTTCCGAGAGC<br>GATTGTCGATTGTGGTTGGCTGGGCCTTCTCTAGCATTACCGTATTTAC<br>TTTACAAATTTACACAGCCCTCCTCCTCGGCCGATCATGGGTCATGGCTG<br>AGATGATCGAGCCCTCAATCGTGAAAAGAGTAGGTATCCATATGCCGCA<br>TTGGCAGAACTAATTTCAACACACGAATGAGAAAAGTTCGTACATTCC<br>TGCTGGATATTACGATATTTGGGGGTGGAGTCCCTAATCTCCTAGTCGCCT<br>CACAAAATTTGCAAAATTTGGGATTGAAGATAAGCAATTTTGAATGGGAT<br>GTTTCTTATTGTTACTGGATGCTCCTGTTAGGAGTAGCTCTATGTCCTGCC                                                                                                                                                                                                                                                                                                                                                                                                                                                                                                                                                                                                                                                                                                                                                                                                                                                                                                                                                                                                                                                                                                                   |

|          |                                                                                                                                                                                                                                                                                                                                                                                                                                                                                                                                                                                                                                                                                                                                                                                                                                                                                                                                                                                                                                                                                                                                                                                                                                                                                                                                                                      |
|----------|----------------------------------------------------------------------------------------------------------------------------------------------------------------------------------------------------------------------------------------------------------------------------------------------------------------------------------------------------------------------------------------------------------------------------------------------------------------------------------------------------------------------------------------------------------------------------------------------------------------------------------------------------------------------------------------------------------------------------------------------------------------------------------------------------------------------------------------------------------------------------------------------------------------------------------------------------------------------------------------------------------------------------------------------------------------------------------------------------------------------------------------------------------------------------------------------------------------------------------------------------------------------------------------------------------------------------------------------------------------------|
|          | <p>ATGTGGCTTGGCAGTCCAAAGGATATGAAGTGGTTAGCTGCGTCATCAGT<br/> CTGTATTGTGGTGA CTGTGGGTGCTCTAACCTGGTATTTGCTATTGCATGA<br/> ACCGTTGCCCCAGGTGCTGTGCCTCCCGATCTACCAGAAGTCTCATGGC<br/> AGTCTCTAGCTATAGCATATGGGATTCTCGCCTTCCAGTTTGATATCCATCC<br/> AATGATATTGACAGTGCAAGTAGATATGGAAAAGAAAAATAAACTAGGG<br/> CATGCAATTTTAGCCGGATTTCTAGTGAGTGGTGGTCTCTCAATCGTGAC<br/> ATGCATCATCATCTACTTGC GGTTCCGGAACCAGCATCAATTACAATATCTT<br/> GCCGGGGCTTCAGCCGCACATCTTGCTCTACGTTGATGCTTTTCTGGTAA<br/> CCCTTCAAATTTGCTTATCAATGGTCGTTGGAGGCACAGCGCTTTTTCAA<br/> GACGTTGAGGACAAACTTGGGGTTCGAGAGATTTC AATTGGAAACGAT<br/> GTGTGGTACGAAGTAGTATCCTGATGACGGCCGTATTAATCGGTGAGGCG<br/> GTGCCGCGGTTTGACCTGGTCATGGGGCTCCTCGGCGGTGCCCTCACCG<br/> GGCCTCTTATGTTTCATCCTACCTCCGATCATACTACAGACTTCGCTCCA<br/> TTCTTTGGCGCAAACA ACTTATTGCCCGGATTGATAGGTACGAAGCTGAC<br/> GGCGCTCGTCTCCGGAAGAGCTCCTCCGAAAACAACGCTGCCTCCTC<br/> AACAACTGAGCTACGCGCCTAACGCTTTCGGGTTGGTGACAAACGACAT<br/> GTCAACGGGCAAGGAGCCGATACCCACAGGCCCGGCTTCAGGGAGCTT<br/> CAGCTCGGAGACCTCCAGCAGCTGGGGTCCCTGCCGCAGCCCTACTTG<br/> CCCCCTCGGAGCTGCTCGACCCCCACTGGCGCCTCGGTCCCTGGTGC<br/> AACACCTCGTGGGACTCGTATCCACGGAAGTCGACGAGTCGGTGTCCCA<br/> ACTGGGATGCTGCGAGCTGGCTATGACGTTCTGTGATCGTGGGTGCTGGG<br/> ATAACGGCTACGGTCGTTGCCACGTACTACGCCCTCGTCGGGAACATCGC<br/> GTATGCCACGTTCTCGCCGCCGTGTATCGTCAGTGTGAACGAGGCTTCTA<br/> GGGCCATTTTCGACGAGCTCGTGACGTAG</p> |
| BtAAAP23 | <p>ATGACGTATTTCCGACGATTTTATATAACCCCGATAAGTGCAGCGGTGAAT<br/> GTGGCATGGGCGACGATAAAAAGCGGTCAATCCGGAGGACAGCCCTTGCG<br/> TCGAACTTATCCAAAAAATGACGGGTCAGCGGACAGGTGAGGAGGCCG<br/> GAGGTGCCCAAGGCAAACAAGAGCCCAATGAGCACGTCAATTTCCGCC<br/> AGTTCAATGGCCCCAAGGCAACCGACAACACGGAAATGGCCACCATGTC<br/> TGGCTACGGCTCGGCCGATCGAGGCGACGAAGATGGTTTTCGGAGGCAAG<br/> CAAGTCAATTTTCCAAATCCAGGGCCACTACATTCGAGAGTGGGTGCA<br/> GCTTTGATGAGTTCGGGGAGAGGGGCAGGCACAAGATCAACGAATGGC<br/> AAGCAGCTTGGAATGTGACCAATGCAATTCAGGGAATGTTTCATCGTATCC<br/> CTGCCATTCAACGTGCTCCGAGGAGGTTACTGGGCAATCGGAGCGATGA<br/> TAGGAACCGCGTACATCTGCTGCTACACAGGTAAGATTCTGGTGGAGTGC<br/> TTGTACGAGCTGGACACGATGACCGGGGAGCGAGTCCGCGTGCGTGACT<br/> CATACTGTCCATCGCGCGGGAATGTTTCGGACCCTTGTGGGGCGCCAG<br/> GATCGTCAACATGGCTCAGATGATCGAGCTTCTCATGACGTGCATCCTCT<br/> ACGTCGTCGCTGCGGTGACCTCCTCATCGGAACCTTTCCCGAAGGCGT<br/> CATCGACACCCGGAGTTGGATGATGCTCGTCCGTTGCTTCCTGGTCCCTT<br/> TGGGCTTCCCTAAAATCTCTCCACCACGTCTCGACTCTCAGCTTCTGGTGC<br/> ACCATGTCCCACATCTTCATCAACGTCATCATCCTAGGCTACTGTTTGCTC<br/> GAGCTCCCCAGCTGGGGCTGGAGCAAAGTCAAGTGGACTCTGGACTTG<br/> GAGAACTTCCCCATCTCCCTGGGCGTCATCGTCTTCAGTTACACCTCTCA</p>                                                                                                                                                                                                                 |

|          |                                                                                                                                                                                                                                                                                                                                                                                                                                                                                                                                                                                                                                                                                                                                                                                                                                                                                                                                                                                                                                                                                                                                                                                                                                                                                                                                                                                                                                                                                                                                                                                                                   |
|----------|-------------------------------------------------------------------------------------------------------------------------------------------------------------------------------------------------------------------------------------------------------------------------------------------------------------------------------------------------------------------------------------------------------------------------------------------------------------------------------------------------------------------------------------------------------------------------------------------------------------------------------------------------------------------------------------------------------------------------------------------------------------------------------------------------------------------------------------------------------------------------------------------------------------------------------------------------------------------------------------------------------------------------------------------------------------------------------------------------------------------------------------------------------------------------------------------------------------------------------------------------------------------------------------------------------------------------------------------------------------------------------------------------------------------------------------------------------------------------------------------------------------------------------------------------------------------------------------------------------------------|
|          | <p>GATATTCTTGCCCAACCTCGAGGGGAACCTCATCGACCGCTCCAAGTTCCG<br/> ACTGGATGCTCGACTGGTCGCACATCGCCGCCGCAATTTCAAGTCCCTC<br/> TTCGGCTACATCTGCTTCTGACCTTCCAGAACGACACGCAGCAGGTCAT<br/> CACCAACAACCTCCACTCGCCCGCTTCAAGGGGCTCGTCAATTTTTTCC<br/> TCGTAATCAAAGCAATACTCTTATCCTCTGCCCTACTACGCTGCCTGCG<br/> ACCTCCTCGAGAAGTCCTTCTTCAAGGGTGCCCCGGAGACCCGGTCCC<br/> GACGATATGGCACATGGACGGCGAGCTCAAGGTCTGGGGTCTCGCCTTC<br/> CGAGTCGGCATCATCGTCGGCACCGTTCTCATGGCCATCCTCATCCCGCA<br/> TTTCATCATTTCTCATGGGTTTCATCGGGAATTTACAGGTACCATGTTGTC<br/> TTTCATCTGGCCGTGCTATTTCCATCTCAAGTTGAAGGGGGATACACTCG<br/> AGAGAAAGACTGTCATCTTCGACTGTTTTGTAATATGTTGGGCTGCCTT<br/> TTCGGGATCATCGGGATTTACGACTCCGGCTCGGCGATGATCAAGGCTTT<br/> TGAAATAGGACTTCCATTTAG</p>                                                                                                                                                                                                                                                                                                                                                                                                                                                                                                                                                                                                                                                                                                                                                                                                                                                                                            |
| BtAAAP24 | <p>ATGGGTTTCAATAAGAAAACAGAATCTCAAAACACACTTGATCTCAGCG<br/> TGAATGATGAAAAGCCGAAAAGGATCTTGAAGGAGCAGGAGGAAG<br/> AGTATGATCCGTACAAACAGGAGCAGACAGGAAAACTACATCTTATTTT<br/> GAAGCCCTGCTAATTTTGATAAAAGCAAGTTTAGGAACAGGAATCTTAGG<br/> TATGCCGAGAGCTTTTTACAATGCTGGCTATCTCCTAGGAACAATCGGAA<br/> CTATTGTTGCCGGGGTTCTTACCACGCAAACGGCTCACATGATCTCAAGC<br/> ACGGAGTATGAATTGAGCAGGCGGAAGAGAGTTCCTCGGCTGACATATC<br/> CCGAGACAATAGAGGCAGCTTTTGAAGTGGGTCCGGGAAATTTTGGTTCG<br/> CTTCAAACGACTCGCTGGGCAAATTTGTTACGTATATATGATTCTGCTTGA<br/> GTTTGGCGGTGACTGTGTCTACGCAATTTTCATTGCAGAAAATGTGAAGG<br/> CGATCTGCGACCATAGGTACGGAACGCACAGTCTGCGGTGGTACCAGAC<br/> GTGGCTGATGATCCCTTTGATCCTGATCTGTTGGATCAAGAACCTGAAAT<br/> ACCTGGCCCCCGGCTCGACGCTGGGCACCGGCTGCGCCGTGGGTTGTTT<br/> CGGTGTCATCTACTACTTTCATATTTTCTCAGCCGATCGCCCTCGAGGGCCG<br/> CAAGGCCATCGGCTCCTTCCGGGAGTTCGCCCTCTTTTTTGGTACCGCCC<br/> TCTTTGCTATGGGCGCCTTCGGCATTGTTGTGCCTTTGAAGAACAAGATG<br/> ACAAACCCAAAACGATTTGGTGGCACCTTTGGAGTTGTCAATGCCACTAT<br/> GATTCCCAACATGACAATGTATGTGTTGATGGGATTTTTTGGTTATTTGGC<br/> ATACGGCAATTTACCCAAAGCAGCATCACACTAAATCTACCTCAGACCG<br/> GAGCGATTGGTGATGTAATAAGGATTTTGATGGCCGGATCTATTTTCACGA<br/> CGTATCCATTGTGCAATTACGTGGTTACCGACATGGTGTGGCATAAGTGG<br/> ATGAAGCTCAAATTCGGGGACAACAAACATTTGGACAAGTGGGAATACG<br/> TTTTCAGGACCTGCTTGTGTTTACCAATTAATTGTGCTGCATCGCGATT<br/> CGAACTTGGAGCTGTTTCATGTCCCTGAGCGGCTCGTTGTGCCTCCCTGCC<br/> CTGGGTATCTTCTTCCCGATCATCATCCACACCCTCACCTTCTGGCACTCC<br/> TACACCGGCTGGCGCTTCTTCTTCTCCTCTTCCGGGCTGCCCTCATCGTC<br/> GCGCTCGGCCCTTTGCCTTCTCGTCTCTTTCAGCACCACCGTTTACGA<br/> GATCGTCACCTCAATTTTCTCGCCGAGGACAATCATGTCTGA</p> |
| BtAAAP25 | <p>ATGAGCAATGAAGAAGTACCTCTGTTGAGCGGTGTCGGAGGTGGTGTCCG<br/> GAAATTCGAAATGTTCCCTTCAAAGGCCGTGCCCTGTTCTTCGCCCTCCCTG<br/> TGCGTGATCGACCTATTCGGGGTCTTCCCGATCGTAGCCCTTCCGAGAGC</p>                                                                                                                                                                                                                                                                                                                                                                                                                                                                                                                                                                                                                                                                                                                                                                                                                                                                                                                                                                                                                                                                                                                                                                                                                                                                                                                                                                                                                                       |

GATTGTCGATTGTGGTTGGCTGGGCCTTCCTCTAGCATTACCGTATTTAC  
TTTACAAATTTACACAGCCCTCCTCCTCGGCCGATCATGGGTCATGGCTG  
AGATGATCGAGCCCTCTATCGTGGAAAAGAGTAGGTATCCATATGCCGCA  
TTGGCAGAACTAACTTTCAACACACGAATGAGAAAAGTTTCGTACATTCC  
TGCTGGATATTACGATATTTGGGGGTGGAGTCCCTAATCTCCTAGTCGCCT  
CACAAAATTTGCAAATATTGGGATTGAAGATAAGCAATTTTGAATGGGAT  
GTTTCTTATTGTTACTGGATGCTCTTGTTAGGAGTAGCTCTGTGTCCTGCC  
ATGTGGCTTGGCAGTCCAAAGGATATGAAGTGGTTAGCTGCGTCATCAGT  
CTGTATTGTGGTAACTGTGGGTGCTCTAACCTGGTATTTGCTATTGCATGA  
ACCGTTGCCCCAGGTGCTGTGCCTCCCGTTCTACCAGAAGTCTCATGGC  
AGTCTCTAGCTATAGCATATGGGATTCTCGCCTTCCAGTTTGATATCCATCC  
AATGATATTGACAGTGCAAGTAGATATGGAAAAGAAAAATAAACTAGGG  
CATGCAATTTAGCCGGATTTCTAGTGAGCGGTGGTCTCTATCGTGAC  
ATGCATCATCTACTTGCGGTTCGGAACCAGCATCAATTACAATATCTT  
GCCGGGGCTTCAGCCGCACATCTTGCTCTACGTTGATGCTTTTCTGGTAA  
CCCTTCAAATTTGCTTATCAATGGTGGTTGGAGGCACAGCGCTTTTTCAA  
GACGTCGAAGACAACTTGGGGTTCGAGAGATTTCAATTGGAAACGAT  
GCGTGGTACGAAGTAGTATCCTGATGACGGCCGTATTAATCGGTGAGGCG  
GTGCCGCGTTTTGACCTGGTCATGGGGCTCTTGGGTGGTGCCTCACTG  
GACCTCTTATGTTTCATCCTACCTCCAATCATACTACAGACTTCGCTCCA  
TTCTTTGGCGCAAACAACCTTATCGCCCGGATTGACAGGTACGAAGCTGA  
CGGCGCTCGTCTCCGAGAAGAGCTCCTACGGAAAACAACGCTGCCTCCT  
CAACAACCTGAGCTACGCGCCCAACGCTTTCGGGGTTGGTGACCAACGACA  
TGTCAACGGGCAAGGAGCCCATACCCACGGGCCCGGCCTCAGGGAGCTT  
CAGCTCGGAGACCTCTAGCAGCCTGGGGTCCCTGCCGCAGCCCTACTTG  
CCCCGTCGGAGCTGCTCGACCCCCACTGGCGCCTCGGTCCCTGGTAC  
AACACCTCGTGGGACTCGTATCCACGGAAGTCGACGAGTCGGTGTCCCA  
ACTGGGATGCTGCGAGCTGGCTATGACGTTTCGTGATCGTGGGTGCTGGG  
ATAACAGCTACCGTCGTTGCCACGTACTACGCCCTTGTCGGGAACATCGC  
GTATGCTACGTTCTCGCCCGCGTGTATCGTCAGTGTGAACGAGGCCTCTA  
GGGCCATTTTCGACGAGCTCGTGACGTAG
